# Supplementary material for: Abscisic Acid Regulates Carbohydrate Metabolism, Redox Homeostasis and Hormonal Regulation to Enhance Cold Tolerance in Spring Barley
Source: MDPI journal article supplement (doi:10.3390/ijms241411348), 2023-07-12
Supplement: s1 [file s1]

Table S1. MS/MS spectrum database search analysis summary

| Total spectrum | Matched<br>spectrum | Peptides | Unique<br>peptides | Identified<br>proteins | Quantifiable<br>proteins |
|----------------|---------------------|----------|--------------------|------------------------|--------------------------|
| 2061695        | 226165 (11.0%)      | 24722    | 21770              | 3879                   | 3200                     |

Table S4. List all of the differently abundant proteins between the four comparable groups (WT\_LT/WT\_OT, *Az34*\_LT/WT\_OT, *Az34*\_LT/*Az34*\_OT, *Az34*\_OT/WT\_OT). WO1, WT\_OT-1; WO2, WT\_OT-2; WO3, WT\_OT-3; WL1, WT\_LT-1; WL2, WT\_LT-2; WL3, WT\_LT-3; AO1, *Az34*\_OT-1; AO2, *Az34*\_OT-2; AO3, *Az34*\_OT-3; AL1, *Az34*\_LT-1; AL2, *Az34*\_LT-2; AL3, *Az34*\_LT-3; OT, optimum temperature; LT, low temperature.

Table S3. The calibration curve of phytohormone quantification in barley leaves

| Compounds | Calibration curve                 | Correlation coefficient R |
|-----------|-----------------------------------|---------------------------|
| ABA       | $y = 17606.93313 x + 1648.63773$  | $r = 0.99165$             |
| IAA       | $y = 19126.28403 x + 3720.99540$  | $r = 0.9950$              |
| IBA       | $y = 493.11550 x + (-805.69827)$  | $r = 0.99379$             |
| IPA       | $y = 3.20808e5 x + 19022.90460$   | $r = 0.99183$             |
| JA        | $y = 1208.45440 x + (-1.54468)$   | $r = 0.99817$             |
| MeSA      | $y = 4.57663e5 x + (-1113.60729)$ | $r = 0.99798$             |
| SA        | $y = 415.65675 x + 772.64317$     | $r = 0.99608$             |
| Zeatin    | $y = 1922.94177 x + (-120.11671)$ | $r = 0.99776$             |
