# Supplementary material for: Abscisic Acid Regulates Carbohydrate Metabolism, Redox Homeostasis and Hormonal Regulation to Enhance Cold Tolerance in Spring Barley
Source: Int J Mol Sci. 2023 Jul 12;24(14):11348. doi: 10.3390/ijms241411348 (PMC10379442; doi:10.3390/ijms241411348)
Supplement: Supplementary file 1 [file ijms-24-11348-s001.zip]

Archive with 4 entries (4 files):
- SUPPL FIG.pdf
- SUPPL Table.pdf
- Table S2.xlsx
- Table S4.xlsx
