# Supplementary material for: Abscisic Acid Regulates Carbohydrate Metabolism, Redox Homeostasis and Hormonal Regulation to Enhance Cold Tolerance in Spring Barley
Source: Int J Mol Sci. 2023 Jul 12;24(14):11348. doi: 10.3390/ijms241411348 (PMC10379442; doi:10.3390/ijms241411348)
Supplement: Supplementary file 1 [file ijms-24-11348-s001.zip › Table S2.xlsx]

## Sheet: Sheet1
Table S2 List all of the differently abundant proteins between the four comparable groups
Cluster	Protein accession	Protein description	Gene name	WO1	WO2	WO3	WL1	WL2	WL3	AO1	AO2	AO3	AL1	AL2	AL3	Az34_OT/WT_OT Ratio	Az34_OT/WT_OT P value	WT_LT/WT_OT Ratio	WT_LT/WT_OT P value	Az34_LT/WT_LT Ratio	Az34_LT/WT_LT P value	Az34_LT/Az34_OT Ratio	Az34_LT/Az34_OT P value	Subcellular localization	Biological Process	Cellular Component	Molecular Function	KEGG KO No.	KEGG Gene	KEGG pathway	Pfam ID	Domain description	KOG category	KOG NO.	KOG description	ID	Pro ID	Membership
Cluster1	Q40077	Seed imbibition protein OS=Hordeum vulgare subsp. vulgare OX=112509 GN=Sip1 PE=4 SV=1	Sip1	0.681	0.715	0.762	0.809	0.516	0.836	1.427	1.278	1.428	1.23	1.12	1.197	1.915	0.000184932	1.001	0.90402	1.641	0.030683	0.858	0.030004	cytoplasm	GO:0005975 carbohydrate metabolic process; GO:0006950 response to stress; GO:0006979 response to oxidative stress; GO:0008152 metabolic process; GO:0009056 catabolic process; GO:0009311 oligosaccharide metabolic process; GO:0009313 oligosaccharide catabolic process; GO:0009628 response to abiotic stimulus; GO:0016052 carbohydrate catabolic process; GO:0033530 raffinose metabolic process; GO:00344…	GO:0005911 cell-cell junction; GO:0009506 plasmodesma; GO:0030054 cell junction; GO:0055044 symplast;	GO:0003824 catalytic activity; GO:0004553 hydrolase activity, hydrolyzing O-glycosyl compounds; GO:0004557 alpha-galactosidase activity; GO:0015925 galactosidase activity; GO:0016787 hydrolase activity; GO:0016798 hydrolase activity, acting on glycosyl bonds; GO:0052692 raffinose alpha-galactosidase activity;	K06617	E2.4.1.82; raffinose synthase [EC:2.4.1.82]	osa00052 Galactose metabolism - Oryza sativa japonica (Japanese rice) (RefSeq); osa01100 Metabolic pathways - Oryza sativa japonica (Japanese rice) (RefSeq);						M0Z8T3	Q40077	0.407748
Cluster1	M0Z6C2	Malate dehydrogenase, chloroplastic(predicted) OS=Hordeum vulgare subsp. vulgare OX=112509 PE=3 SV=1	---	0.451	0.447	0.443	0.477	0.485	0.441	1.474	1.408	1.473	1.652	1.716	1.532	3.248	1.0244e-7	1.046	0.21044	3.493	4.7276e-06	1.125	0.033018	chloroplast	GO:0000003 reproduction; GO:0003006 developmental process involved in reproduction; GO:0006950 response to stress; GO:0007275 multicellular organism development; GO:0008152 metabolic process; GO:0009266 response to temperature stimulus; GO:0009409 response to cold; GO:0009628 response to abiotic stimulus; GO:0009719 response to endogenous stimulus; GO:0009725 response to hormone; GO:0009735 respo…	GO:0005576 extracellular region; GO:0005622 intracellular; GO:0005623 cell; GO:0005737 cytoplasm; GO:0005739 mitochondrion; GO:0005773 vacuole; GO:0005774 vacuolar membrane; GO:0009507 chloroplast; GO:0009526 plastid envelope; GO:0009532 plastid stroma; GO:0009536 plastid; GO:0009570 chloroplast stroma; GO:0009941 chloroplast envelope; GO:0010319 stromule; GO:0016020 membrane; GO:0031090 organell…	GO:0003824 catalytic activity; GO:0008746 NAD(P)+ transhydrogenase activity; GO:0016491 oxidoreductase activity; GO:0016614 oxidoreductase activity, acting on CH-OH group of donors; GO:0016615 malate dehydrogenase activity; GO:0016616 oxidoreductase activity, acting on the CH-OH group of donors, NAD or NADP as acceptor; GO:0016651 oxidoreductase activity, acting on NAD(P)H; GO:0016652 oxidoreduct…	K00026	MDH2; malate dehydrogenase [EC:1.1.1.37]	osa00020 Citrate cycle (TCA cycle) - Oryza sativa japonica (Japanese rice) (RefSeq); osa00270 Cysteine and methionine metabolism - Oryza sativa japonica (Japanese rice) (RefSeq); osa00620 Pyruvate metabolism - Oryza sativa japonica (Japanese rice) (RefSeq); osa00630 Glyoxylate and dicarboxylate metabolism - Oryza sativa japonica (Japanese rice) (RefSeq); osa00710 Carbon fixation in photosynthetic…	PF02866	lactate/malate dehydrogenase, alpha/beta C-terminal domain	C	KOG1494	NAD-dependent malate dehydrogenase	M0Y746	M0Z6C2	0.649204
Cluster1	M0YUD2	Serine decarboxylase 1(predicted) OS=Hordeum vulgare subsp. vulgare OX=112509 PE=3 SV=1	---	0.717	0.723	0.62	0.582	0.724	0.642	1.498	1.463	1.289	1.213	1.308	1.221	2.063	0.00044363	0.946	0.5147	1.921	0.00062483	0.88	0.074803	cytoplasm				K01590	hdc, HDC; histidine decarboxylase [EC:4.1.1.22]	osa00340 Histidine metabolism - Oryza sativa japonica (Japanese rice) (RefSeq); osa01100 Metabolic pathways - Oryza sativa japonica (Japanese rice) (RefSeq); osa01110 Biosynthesis of secondary metabolites - Oryza sativa japonica (Japanese rice) (RefSeq);	PF00282	Pyridoxal-dependent decarboxylase conserved domain	E	KOG0629	Glutamate decarboxylase and related proteins	A0A287FDJ7	M0YUD2	0.544726
Cluster1	M0YNW0	Alpha-1,4 glucan phosphorylase OS=Hordeum vulgare subsp. vulgare OX=112509 PE=3 SV=1	---	0.91	0.845	0.865	0.741	0.811	0.803	1.126	1.245	1.113	1.243	1.159	1.14	1.33	0.0024385	0.899	0.041061	1.504	0.00046495	1.017	0.71984	cytoplasm	GO:0000272 polysaccharide catabolic process; GO:0001101 response to acid chemical; GO:0005975 carbohydrate metabolic process; GO:0005976 polysaccharide metabolic process; GO:0005977 glycogen metabolic process; GO:0005980 glycogen catabolic process; GO:0006073 cellular glucan metabolic process; GO:0006091 generation of precursor metabolites and energy; GO:0006112 energy reserve metabolic process; …	GO:0005622 intracellular; GO:0005623 cell; GO:0005737 cytoplasm; GO:0009501 amyloplast; GO:0009507 chloroplast; GO:0009532 plastid stroma; GO:0009536 plastid; GO:0009570 chloroplast stroma; GO:0043226 organelle; GO:0043227 membrane-bounded organelle; GO:0043229 intracellular organelle; GO:0043231 intracellular membrane-bounded organelle; GO:0044422 organelle part; GO:0044424 intracellular part; G…	GO:0003824 catalytic activity; GO:0004645 phosphorylase activity; GO:0005488 binding; GO:0005515 protein binding; GO:0008144 drug binding; GO:0008184 glycogen phosphorylase activity; GO:0016740 transferase activity; GO:0016757 transferase activity, transferring glycosyl groups; GO:0016758 transferase activity, transferring hexosyl groups; GO:0019842 vitamin binding; GO:0030170 pyridoxal phosphate…	K00688	PYG, glgP; glycogen phosphorylase [EC:2.4.1.1]	osa00500 Starch and sucrose metabolism - Oryza sativa japonica (Japanese rice) (RefSeq); osa01100 Metabolic pathways - Oryza sativa japonica (Japanese rice) (RefSeq); osa01110 Biosynthesis of secondary metabolites - Oryza sativa japonica (Japanese rice) (RefSeq);			G	KOG2099	Glycogen phosphorylase	A0A287MK04	M0YNW0	0.469207
Cluster1	M0YMY2	UDP-glucose 6-dehydrogenase OS=Hordeum vulgare subsp. vulgare OX=112509 PE=3 SV=1	---	0.677	0.677	0.88	0.612	0.486	1.233	1.357	1.012	1.076	1.286	1.288	1.418	1.542	0.025755	1.043	0.91912	1.713	0.159184	1.159	0.179262	extracellular	GO:0005975 carbohydrate metabolic process; GO:0005976 polysaccharide metabolic process; GO:0006022 aminoglycan metabolic process; GO:0006023 aminoglycan biosynthetic process; GO:0006024 glycosaminoglycan biosynthetic process; GO:0006065 UDP-glucuronate biosynthetic process; GO:0006082 organic acid metabolic process; GO:0006139 nucleobase-containing compound metabolic process; GO:0006725 cellular …	GO:0005576 extracellular region; GO:0005618 cell wall; GO:0005622 intracellular; GO:0005623 cell; GO:0005634 nucleus; GO:0005737 cytoplasm; GO:0005829 cytosol; GO:0030312 external encapsulating structure; GO:0043226 organelle; GO:0043227 membrane-bounded organelle; GO:0043229 intracellular organelle; GO:0043231 intracellular membrane-bounded organelle; GO:0044424 intracellular part; GO:0044444 cy…	GO:0003824 catalytic activity; GO:0003979 UDP-glucose 6-dehydrogenase activity; GO:0016491 oxidoreductase activity; GO:0016614 oxidoreductase activity, acting on CH-OH group of donors; GO:0016616 oxidoreductase activity, acting on the CH-OH group of donors, NAD or NADP as acceptor;	K00012	UGDH, ugd; UDPglucose 6-dehydrogenase [EC:1.1.1.22]	osa00040 Pentose and glucuronate interconversions - Oryza sativa japonica (Japanese rice) (RefSeq); osa00053 Ascorbate and aldarate metabolism - Oryza sativa japonica (Japanese rice) (RefSeq); osa00520 Amino sugar and nucleotide sugar metabolism - Oryza sativa japonica (Japanese rice) (RefSeq); osa01100 Metabolic pathways - Oryza sativa japonica (Japanese rice) (RefSeq);	PF03721; PF00984; PF03720	UDP-glucose/GDP-mannose dehydrogenase family, NAD binding domain; UDP-glucose/GDP-mannose dehydrogenase family, central domain; UDP-glucose/GDP-mannose dehydrogenase family, UDP binding domain	GT	KOG2666	UDP-glucose/GDP-mannose dehydrogenase	A0A287SY52	M0YMY2	0.318673
Cluster1	M0YIV9	Lipoxygenase OS=Hordeum vulgare subsp. vulgare OX=112509 PE=3 SV=1	---	0.339	0.321	0.307	0.318	0.334	0.287	1.696	1.869	1.771	1.542	1.647	1.569	5.518	9.1176e-7	0.971	0.59594	5.067	2.4359e-06	0.892	0.029138	chloroplast	GO:0001101 response to acid chemical; GO:0006082 organic acid metabolic process; GO:0006629 lipid metabolic process; GO:0006631 fatty acid metabolic process; GO:0006690 icosanoid metabolic process; GO:0008152 metabolic process; GO:0009719 response to endogenous stimulus; GO:0009725 response to hormone; GO:0009751 response to salicylic acid; GO:0009753 response to jasmonic acid; GO:0009987 cellula…	GO:0005622 intracellular; GO:0005623 cell; GO:0005737 cytoplasm; GO:0009507 chloroplast; GO:0009536 plastid; GO:0043226 organelle; GO:0043227 membrane-bounded organelle; GO:0043229 intracellular organelle; GO:0043231 intracellular membrane-bounded organelle; GO:0044424 intracellular part; GO:0044444 cytoplasmic part; GO:0044464 cell part;	GO:0003824 catalytic activity; GO:0016165 linoleate 13S-lipoxygenase activity; GO:0016491 oxidoreductase activity; GO:0016701 oxidoreductase activity, acting on single donors with incorporation of molecular oxygen; GO:0016702 oxidoreductase activity, acting on single donors with incorporation of molecular oxygen, incorporation of two atoms of oxygen; GO:0051213 dioxygenase activity;	K00454	LOX2S; lipoxygenase [EC:1.13.11.12]	osa00591 Linoleic acid metabolism - Oryza sativa japonica (Japanese rice) (RefSeq); osa00592 alpha-Linolenic acid metabolism - Oryza sativa japonica (Japanese rice) (RefSeq); osa01100 Metabolic pathways - Oryza sativa japonica (Japanese rice) (RefSeq); osa01110 Biosynthesis of secondary metabolites - Oryza sativa japonica (Japanese rice) (RefSeq);	PF01477; PF00305	PLAT/LH2 domain; Lipoxygenase				A0A287DTW2	M0YIV9	0.723334
Cluster1	M0Y746	RNase S-like protein(predicted) OS=Hordeum vulgare subsp. vulgare OX=112509 PE=3 SV=1	---	0.467	0.328	0.447	0.335	0.208	0.266	2.084	1.965	1.811	1.132	1.445	1.513	4.718	0.000195482	0.651	0.069539	5.056	0.00057972	0.698	0.020783	extracellular				K01166	E3.1.27.1; ribonuclease T2 [EC:3.1.27.1]		PF00445	Ribonuclease T2 family	A	KOG1642	Ribonuclease, T2 family	A0A287FA93	M0Y746	0.527169
Cluster1	M0XYI8	UDP-arabinose mutase 3(predicted) OS=Hordeum vulgare subsp. vulgare OX=112509 PE=4 SV=1	---	0.818	0.811	0.751	0.611	0.587	0.722	1.5	1.267	1.294	1.211	1.211	1.217	1.706	0.00087632	0.807	0.034082	1.895	0.0095755	0.896	0.181996	cytoplasm	GO:0005975 carbohydrate metabolic process; GO:0005996 monosaccharide metabolic process; GO:0006139 nucleobase-containing compound metabolic process; GO:0006725 cellular aromatic compound metabolic process; GO:0006793 phosphorus metabolic process; GO:0006807 nitrogen compound metabolic process; GO:0006950 response to stress; GO:0006970 response to osmotic stress; GO:0007275 multicellular organism …	GO:0000138 Golgi trans cisterna; GO:0005618 cell wall; GO:0005622 intracellular; GO:0005623 cell; GO:0005737 cytoplasm; GO:0005773 vacuole; GO:0005774 vacuolar membrane; GO:0005794 Golgi apparatus; GO:0005795 Golgi stack; GO:0005829 cytosol; GO:0005840 ribosome; GO:0005844 polysome; GO:0012505 endomembrane system; GO:0016020 membrane; GO:0022626 cytosolic ribosome; GO:0030312 external encapsulati…	GO:0003735 structural constituent of ribosome; GO:0003824 catalytic activity; GO:0005198 structural molecule activity; GO:0008194 UDP-glycosyltransferase activity; GO:0016740 transferase activity; GO:0016757 transferase activity, transferring glycosyl groups; GO:0016758 transferase activity, transferring hexosyl groups; GO:0016759 cellulose synthase activity; GO:0016760 cellulose synthase (UDP-fo…	K13379	RGP, UTM; reversibly glycosylated polypeptide / UDP-arabinopyranose mutase [EC:2.4.1.- 5.4.99.30]	osa00520 Amino sugar and nucleotide sugar metabolism - Oryza sativa japonica (Japanese rice) (RefSeq); osa01100 Metabolic pathways - Oryza sativa japonica (Japanese rice) (RefSeq);						D2CVR3	M0XYI8	0.472476
Cluster1	M0XT32	Diphosphomevalonate decarboxylase OS=Hordeum vulgare subsp. vulgare OX=112509 PE=3 SV=1	---	0.915	0.988	0.587	0.788	0.883	0.862	1.028	0.973	1.107	1.333	1.072	1.464	1.248	0.21492	1.017	0.8178	1.527	0.0134392	1.245	0.100278	chloroplast	GO:0006066 alcohol metabolic process; GO:0006084 acetyl-CoA metabolic process; GO:0006139 nucleobase-containing compound metabolic process; GO:0006163 purine nucleotide metabolic process; GO:0006464 cellular protein modification process; GO:0006486 protein glycosylation; GO:0006487 protein N-linked glycosylation; GO:0006488 dolichol-linked oligosaccharide biosynthetic process; GO:0006489 dolichyl…	GO:0005622 intracellular; GO:0005623 cell; GO:0005737 cytoplasm; GO:0005777 peroxisome; GO:0005829 cytosol; GO:0042579 microbody; GO:0043226 organelle; GO:0043227 membrane-bounded organelle; GO:0043229 intracellular organelle; GO:0043231 intracellular membrane-bounded organelle; GO:0044424 intracellular part; GO:0044444 cytoplasmic part; GO:0044464 cell part;	GO:0003824 catalytic activity; GO:0004163 diphosphomevalonate decarboxylase activity; GO:0005488 binding; GO:0005515 protein binding; GO:0016829 lyase activity; GO:0016830 carbon-carbon lyase activity; GO:0016831 carboxy-lyase activity; GO:0030544 Hsp70 protein binding; GO:0031072 heat shock protein binding; GO:0042802 identical protein binding; GO:0042803 protein homodimerization activity; GO:00…	K01597	MVD, mvaD; diphosphomevalonate decarboxylase [EC:4.1.1.33]	osa00900 Terpenoid backbone biosynthesis - Oryza sativa japonica (Japanese rice) (RefSeq); osa01100 Metabolic pathways - Oryza sativa japonica (Japanese rice) (RefSeq); osa01110 Biosynthesis of secondary metabolites - Oryza sativa japonica (Japanese rice) (RefSeq);			I	KOG2833	Mevalonate pyrophosphate decarboxylase	A0A287IHS1	M0XT32	0.308629
Cluster1	M0XGG9	Actin-3(predicted) OS=Hordeum vulgare subsp. vulgare OX=112509 PE=3 SV=1	---	0.665	0.72	0.679	0.711	0.672	0.687	1.438	1.327	1.334	1.292	1.249	1.225	1.986	4.0438e-05	1.003	0.91712	1.819	1.60595e-05	0.919	0.0495	cytoskeleton		GO:0005622 intracellular; GO:0005623 cell; GO:0005856 cytoskeleton; GO:0043226 organelle; GO:0043228 non-membrane-bounded organelle; GO:0043229 intracellular organelle; GO:0043232 intracellular non-membrane-bounded organelle; GO:0044424 intracellular part; GO:0044464 cell part;		K10355	ACTF; actin, other eukaryote				Z	KOG0676	Actin and related proteins	A0A287GM11	M0XGG9	0.627863
Cluster1	M0XDX5	Gln-synt_C domain-containing protein OS=Hordeum vulgare subsp. vulgare OX=112509 PE=3 SV=1	---	0.716	0.753	0.728	0.761	0.711	0.674	1.348	1.251	1.403	1.224	1.249	1.183	1.822	8.1414e-05	0.977	0.55544	1.704	0.000158758	0.914	0.073515	chloroplast	GO:0000003 reproduction; GO:0000905 sporocarp development involved in asexual reproduction; GO:0001896 autolysis; GO:0003006 developmental process involved in reproduction; GO:0006725 cellular aromatic compound metabolic process; GO:0007275 multicellular organism development; GO:0008152 metabolic process; GO:0008219 cell death; GO:0009058 biosynthetic process; GO:0009403 toxin biosynthetic proces…	GO:0005622 intracellular; GO:0005623 cell; GO:0005737 cytoplasm; GO:0044424 intracellular part; GO:0044464 cell part;					PF04909; PF00120	Amidohydrolase; Glutamine synthetase, catalytic domain	E	KOG0683	Glutamine synthetase	A0A287T475	M0XDX5	0.595812
Cluster1	M0VUE3	PKS_ER domain-containing protein OS=Hordeum vulgare subsp. vulgare OX=112509 PE=3 SV=1	---	0.858	0.86	0.826	0.785	0.589	0.912	1.168	1.233	1.307	1.107	1.022	1.334	1.458	0.00042309	0.899	0.44142	1.515	0.047724	0.934	0.437	cytoplasm				K23232		osa00902 Monoterpenoid biosynthesis - Oryza sativa japonica (Japanese rice) (RefSeq); osa01100 Metabolic pathways - Oryza sativa japonica (Japanese rice) (RefSeq); osa01110 Biosynthesis of secondary metabolites - Oryza sativa japonica (Japanese rice) (RefSeq);	PF08240	Alcohol dehydrogenase GroES-like domain	Q	KOG0023	Alcohol dehydrogenase, class V	A0A287L7M0	M0VUE3	0.365659
Cluster1	M0USD8	GLOBIN domain-containing protein OS=Hordeum vulgare subsp. vulgare OX=112509 PE=3 SV=1	---	0.678	0.688	0.649	0.508	0.529	0.522	1.371	1.314	1.296	1.461	1.517	1.468	1.976	4.8792e-06	0.774	0.00026397	2.852	1.9724e-7	1.117	0.0058583	mitochondria	GO:0001666 response to hypoxia; GO:0006950 response to stress; GO:0009628 response to abiotic stimulus; GO:0036293 response to decreased oxygen levels; GO:0050896 response to stimulus; GO:0070482 response to oxygen levels;	GO:0005618 cell wall; GO:0005622 intracellular; GO:0005623 cell; GO:0005737 cytoplasm; GO:0005829 cytosol; GO:0005886 plasma membrane; GO:0005911 cell-cell junction; GO:0009506 plasmodesma; GO:0016020 membrane; GO:0030054 cell junction; GO:0030312 external encapsulating structure; GO:0044424 intracellular part; GO:0044444 cytoplasmic part; GO:0044464 cell part; GO:0055044 symplast; GO:0071944 cel…	GO:0005488 binding; GO:0008144 drug binding; GO:0019825 oxygen binding; GO:0036094 small molecule binding;				PF00042	Globin	C	KOG3378	Globins and related hemoproteins	A0A287XKW2	M0USD8	0.542992
Cluster1	M0UFC7	Mitochondrial transcription termination factor family protein(predicted) OS=Hordeum vulgare subsp. vulgare OX=112509 PE=4 SV=1	---	0.62	0.72	0.661	0.654	0.709	0.707	1.367	1.226	1.258	1.361	1.379	1.338	1.925	0.00027562	1.034	0.52738	1.97	1.84281e-05	1.059	0.161519	chloroplast												A0A287E9Q4	M0UFC7	0.598117
Cluster1	F2E1P5	Predicted protein OS=Hordeum vulgare subsp. vulgare OX=112509 PE=2 SV=1	---	0.765	0.867	0.814	0.591	0.635	1.178	1.384	0.984	1.394	1.068	1.088	1.23	1.538	0.025364	0.983	0.77896	1.408	0.154836	0.9	0.48516	cytoplasm							PF13344; PF13242	Haloacid dehalogenase-like hydrolase; HAD-hyrolase-like				A0A287PII9	F2E1P5	0.313918
Cluster1	F2DXF4	Predicted protein OS=Hordeum vulgare subsp. vulgare OX=112509 PE=2 SV=1	---	0.863	1.009	0.571	0.728	0.834	0.811	1.036	1.301	1.072	1.226	1.276	1.273	1.395	0.125504	0.971	0.9861	1.591	0.000424	1.107	0.2121	cytoplasm							PF00561	alpha/beta hydrolase fold	I	KOG4178	Soluble epoxide hydrolase	A0A287UW51	F2DXF4	0.350729
Cluster1	F2DNM8	Predicted protein OS=Hordeum vulgare subsp. vulgare OX=112509 PE=2 SV=1	---	0.745	0.65	0.725	0.919	0.803	0.833	1.103	0.933	1.079	1.341	1.246	1.622	1.469	0.0046043	1.205	0.032242	1.647	0.0049951	1.351	0.034615	nucleus	GO:0001101 response to acid chemical; GO:0006950 response to stress; GO:0006970 response to osmotic stress; GO:0009628 response to abiotic stimulus; GO:0009651 response to salt stress; GO:0009719 response to endogenous stimulus; GO:0009725 response to hormone; GO:0009735 response to cytokinin; GO:0009737 response to abscisic acid; GO:0009787 regulation of abscisic acid-activated signaling pathway…	GO:0005622 intracellular; GO:0005623 cell; GO:0005634 nucleus; GO:0005737 cytoplasm; GO:0005777 peroxisome; GO:0005829 cytosol; GO:0005886 plasma membrane; GO:0016020 membrane; GO:0042579 microbody; GO:0043226 organelle; GO:0043227 membrane-bounded organelle; GO:0043229 intracellular organelle; GO:0043231 intracellular membrane-bounded organelle; GO:0044424 intracellular part; GO:0044444 cytoplas…	GO:0003676 nucleic acid binding; GO:0003723 RNA binding; GO:0003729 mRNA binding; GO:0005488 binding; GO:0097159 organic cyclic compound binding; GO:1901363 heterocyclic compound binding;	K13199	SERBP1; plasminogen activator inhibitor 1 RNA-binding protein				S	KOG2945	Predicted RNA-binding protein	M0XGG9	F2DNM8	0.357511
Cluster1	F2DMU6	Phospho-2-dehydro-3-deoxyheptonate aldolase OS=Hordeum vulgare subsp. vulgare OX=112509 PE=2 SV=1	---	0.639	0.525	0.471	0.603	0.659	0.69	1.002	0.919	1.297	1.603	1.86	1.734	1.968	0.0078572	1.194	0.133038	2.662	7.7084e-05	1.615	0.0120643	chloroplast				K01626	E2.5.1.54, aroF, aroG, aroH; 3-deoxy-7-phosphoheptulonate synthase [EC:2.5.1.54]	osa00400 Phenylalanine, tyrosine and tryptophan biosynthesis - Oryza sativa japonica (Japanese rice) (RefSeq); osa01100 Metabolic pathways - Oryza sativa japonica (Japanese rice) (RefSeq); osa01110 Biosynthesis of secondary metabolites - Oryza sativa japonica (Japanese rice) (RefSeq); osa01230 Biosynthesis of amino acids - Oryza sativa japonica (Japanese rice) (RefSeq);	PF01474	Class-II DAHP synthetase family				M0USD8	F2DMU6	0.392654
Cluster1	F2DI93	Predicted protein OS=Hordeum vulgare subsp. vulgare OX=112509 PE=2 SV=1	---	0.72	0.604	0.684	0.988	0.66	0.519	1.454	1.297	1.285	1.218	1.322	1.25	2.01	0.00043894	1.079	0.83616	1.749	0.088295	0.939	0.25414	chloroplast	GO:0000027 ribosomal large subunit assembly; GO:0006412 translation; GO:0006518 peptide metabolic process; GO:0006807 nitrogen compound metabolic process; GO:0006996 organelle organization; GO:0008152 metabolic process; GO:0009058 biosynthetic process; GO:0009059 macromolecule biosynthetic process; GO:0009987 cellular process; GO:0010467 gene expression; GO:0016043 cellular component organization…	GO:0005618 cell wall; GO:0005622 intracellular; GO:0005623 cell; GO:0005634 nucleus; GO:0005730 nucleolus; GO:0005737 cytoplasm; GO:0005773 vacuole; GO:0005774 vacuolar membrane; GO:0005829 cytosol; GO:0005840 ribosome; GO:0005844 polysome; GO:0005886 plasma membrane; GO:0005911 cell-cell junction; GO:0009506 plasmodesma; GO:0015934 large ribosomal subunit; GO:0016020 membrane; GO:0022625 cytosol…	GO:0003676 nucleic acid binding; GO:0003723 RNA binding; GO:0003729 mRNA binding; GO:0003735 structural constituent of ribosome; GO:0005198 structural molecule activity; GO:0005488 binding; GO:0097159 organic cyclic compound binding; GO:1901363 heterocyclic compound binding;	K02925	RP-L3e, RPL3; large subunit ribosomal protein L3e	osa03010 Ribosome - Oryza sativa japonica (Japanese rice) (RefSeq);			J	KOG0746	60S ribosomal protein L3 and related proteins	F2DMU6	F2DI93	0.409183
Cluster1	F2DGW2	Predicted protein OS=Hordeum vulgare subsp. vulgare OX=112509 PE=2 SV=1	---	0.735	0.787	0.848	0.753	0.79	0.767	1.269	1.196	1.275	1.149	1.25	1.181	1.578	0.00058045	0.975	0.60938	1.55	0.000102225	0.957	0.24468	chloroplast				K03787	surE; 5'-nucleotidase [EC:3.1.3.5]	osa00230 Purine metabolism - Oryza sativa japonica (Japanese rice) (RefSeq); osa00240 Pyrimidine metabolism - Oryza sativa japonica (Japanese rice) (RefSeq); osa00760 Nicotinate and nicotinamide metabolism - Oryza sativa japonica (Japanese rice) (RefSeq); osa01100 Metabolic pathways - Oryza sativa japonica (Japanese rice) (RefSeq); osa01110 Biosynthesis of secondary metabolites - Oryza sativa jap…						A0A287V7D1	F2DGW2	0.590812
Cluster1	F2DGS0	Predicted protein OS=Hordeum vulgare subsp. vulgare OX=112509 PE=2 SV=1	---	1.065	0.675	0.8	0.524	0.837	0.673	1.246	1.253	1.185	1.329	1.299	1.114	1.45	0.101097	0.801	0.30638	1.84	0.0129205	1.016	0.83516	chloroplast												A0A287PRV9	F2DGS0	0.332147
Cluster1	F2D0E7	UDP-glucose 6-dehydrogenase OS=Hordeum vulgare subsp. vulgare OX=112509 PE=2 SV=1	---	0.785	0.736	0.733	0.862	0.902	0.822	1.08	1.023	1.094	1.318	1.311	1.332	1.418	0.00032023	1.147	0.016942	1.532	9.8166e-05	1.239	0.00052197	extracellular	GO:0005975 carbohydrate metabolic process; GO:0005976 polysaccharide metabolic process; GO:0006022 aminoglycan metabolic process; GO:0006023 aminoglycan biosynthetic process; GO:0006024 glycosaminoglycan biosynthetic process; GO:0006065 UDP-glucuronate biosynthetic process; GO:0006082 organic acid metabolic process; GO:0006139 nucleobase-containing compound metabolic process; GO:0006725 cellular …	GO:0005576 extracellular region; GO:0005618 cell wall; GO:0005622 intracellular; GO:0005623 cell; GO:0005634 nucleus; GO:0005737 cytoplasm; GO:0005829 cytosol; GO:0030312 external encapsulating structure; GO:0043226 organelle; GO:0043227 membrane-bounded organelle; GO:0043229 intracellular organelle; GO:0043231 intracellular membrane-bounded organelle; GO:0044424 intracellular part; GO:0044444 cy…	GO:0003824 catalytic activity; GO:0003979 UDP-glucose 6-dehydrogenase activity; GO:0016491 oxidoreductase activity; GO:0016614 oxidoreductase activity, acting on CH-OH group of donors; GO:0016616 oxidoreductase activity, acting on the CH-OH group of donors, NAD or NADP as acceptor;	K00012	UGDH, ugd; UDPglucose 6-dehydrogenase [EC:1.1.1.22]	osa00040 Pentose and glucuronate interconversions - Oryza sativa japonica (Japanese rice) (RefSeq); osa00053 Ascorbate and aldarate metabolism - Oryza sativa japonica (Japanese rice) (RefSeq); osa00520 Amino sugar and nucleotide sugar metabolism - Oryza sativa japonica (Japanese rice) (RefSeq); osa01100 Metabolic pathways - Oryza sativa japonica (Japanese rice) (RefSeq);	PF03721; PF00984; PF03720	UDP-glucose/GDP-mannose dehydrogenase family, NAD binding domain; UDP-glucose/GDP-mannose dehydrogenase family, central domain; UDP-glucose/GDP-mannose dehydrogenase family, UDP binding domain	GT	KOG2666	UDP-glucose/GDP-mannose dehydrogenase	A0A287JMQ3	F2D0E7	0.399753
Cluster1	F2CWX3	Predicted protein OS=Hordeum vulgare subsp. vulgare OX=112509 PE=2 SV=1	---	0.552	0.477	0.491	0.325	0.404	0.467	1.665	1.701	1.553	1.483	1.404	1.479	3.236	2.1705e-05	0.787	0.095463	3.651	0.00025877	0.888	0.022197	chloroplast	GO:0006082 organic acid metabolic process; GO:0006629 lipid metabolic process; GO:0006950 response to stress; GO:0006952 defense response; GO:0008152 metabolic process; GO:0008202 steroid metabolic process; GO:0009058 biosynthetic process; GO:0009694 jasmonic acid metabolic process; GO:0009695 jasmonic acid biosynthetic process; GO:0009987 cellular process; GO:0010817 regulation of hormone levels…	GO:0005622 intracellular; GO:0005623 cell; GO:0005737 cytoplasm; GO:0009507 chloroplast; GO:0009526 plastid envelope; GO:0009534 chloroplast thylakoid; GO:0009535 chloroplast thylakoid membrane; GO:0009536 plastid; GO:0009579 thylakoid; GO:0009941 chloroplast envelope; GO:0016020 membrane; GO:0031967 organelle envelope; GO:0031975 envelope; GO:0031976 plastid thylakoid; GO:0031984 organelle subco…	GO:0003824 catalytic activity; GO:0004497 monooxygenase activity; GO:0016491 oxidoreductase activity;	K01723	AOS; hydroperoxide dehydratase [EC:4.2.1.92]	osa00592 alpha-Linolenic acid metabolism - Oryza sativa japonica (Japanese rice) (RefSeq); osa01100 Metabolic pathways - Oryza sativa japonica (Japanese rice) (RefSeq); osa01110 Biosynthesis of secondary metabolites - Oryza sativa japonica (Japanese rice) (RefSeq);	PF00067	Cytochrome P450				A0A287K2I6	F2CWX3	0.631052
Cluster1	F2CWD2	Lipoxygenase OS=Hordeum vulgare subsp. vulgare OX=112509 PE=2 SV=1	---	0.438	0.413	0.514	0.588	0.627	0.589	1.401	1.355	1.468	1.481	1.542	1.585	3.095	8.1076e-05	1.322	0.0146629	2.554	2.6858e-06	1.091	0.045865	cytoplasm	GO:0006950 response to stress; GO:0008152 metabolic process; GO:0009605 response to external stimulus; GO:0009607 response to biotic stimulus; GO:0009611 response to wounding; GO:0043207 response to external biotic stimulus; GO:0050896 response to stimulus; GO:0051704 multi-organism process; GO:0051707 response to other organism; GO:0055114 oxidation-reduction process;	GO:0005622 intracellular; GO:0005623 cell; GO:0005737 cytoplasm; GO:0044424 intracellular part; GO:0044464 cell part;	GO:0003824 catalytic activity; GO:0016165 linoleate 13S-lipoxygenase activity; GO:0016491 oxidoreductase activity; GO:0016701 oxidoreductase activity, acting on single donors with incorporation of molecular oxygen; GO:0016702 oxidoreductase activity, acting on single donors with incorporation of molecular oxygen, incorporation of two atoms of oxygen; GO:0051213 dioxygenase activity;	K15718	LOX1_5; linoleate 9S-lipoxygenase [EC:1.13.11.58]	osa00591 Linoleic acid metabolism - Oryza sativa japonica (Japanese rice) (RefSeq);	PF01477; PF00305	PLAT/LH2 domain; Lipoxygenase				A0A287N943	F2CWD2	0.465152
Cluster1	F2CSC9	Predicted protein OS=Hordeum vulgare subsp. vulgare OX=112509 PE=2 SV=1	---	0.761	0.797	0.887	0.648	0.599	0.693	1.356	1.387	1.052	1.157	1.325	1.339	1.552	0.0120607	0.793	0.020262	1.97	0.00042397	1.007	0.90862	vacuolar membrane	GO:0006810 transport; GO:0006869 lipid transport; GO:0006950 response to stress; GO:0006952 defense response; GO:0007275 multicellular organism development; GO:0009605 response to external stimulus; GO:0009607 response to biotic stimulus; GO:0009620 response to fungus; GO:0010876 lipid localization; GO:0032501 multicellular organismal process; GO:0032502 developmental process; GO:0033036 macromol…	GO:0005618 cell wall; GO:0005622 intracellular; GO:0005623 cell; GO:0005737 cytoplasm; GO:0005783 endoplasmic reticulum; GO:0005794 Golgi apparatus; GO:0005886 plasma membrane; GO:0009505 plant-type cell wall; GO:0012505 endomembrane system; GO:0016020 membrane; GO:0030312 external encapsulating structure; GO:0031224 intrinsic component of membrane; GO:0031225 anchored component of membrane; GO:0…	GO:0005488 binding; GO:0008289 lipid binding;									A0A287F7D4	F2CSC9	0.39158
Cluster1	F2CPX2	Ferredoxin OS=Hordeum vulgare subsp. vulgare OX=112509 PE=2 SV=1	---	0.62	0.738	0.751	0.745	0.727	0.862	1.103	1.17	1.115	1.333	1.362	1.473	1.606	0.00170412	1.107	0.27608	1.786	0.00068217	1.23	0.0042762	chloroplast				K02639	petF; ferredoxin	osa00195 Photosynthesis - Oryza sativa japonica (Japanese rice) (RefSeq);	PF00111	2Fe-2S iron-sulfur cluster binding domain				Q70DK2	F2CPX2	0.438327
Cluster1	F2CPM8	Predicted protein OS=Hordeum vulgare subsp. vulgare OX=112509 PE=2 SV=1	---	0.675	0.698	0.681	0.665	0.659	0.654	1.228	1.267	1.333	1.346	1.364	1.43	1.864	1.89433e-05	0.963	0.027722	2.093	1.3079e-06	1.082	0.059636	chloroplast	GO:0000096 sulfur amino acid metabolic process; GO:0000097 sulfur amino acid biosynthetic process; GO:0001887 selenium compound metabolic process; GO:0006082 organic acid metabolic process; GO:0006520 cellular amino acid metabolic process; GO:0006555 methionine metabolic process; GO:0006790 sulfur compound metabolic process; GO:0006807 nitrogen compound metabolic process; GO:0008152 metabolic pro…	GO:0005622 intracellular; GO:0005623 cell; GO:0005737 cytoplasm; GO:0009507 chloroplast; GO:0009532 plastid stroma; GO:0009536 plastid; GO:0009570 chloroplast stroma; GO:0043226 organelle; GO:0043227 membrane-bounded organelle; GO:0043229 intracellular organelle; GO:0043231 intracellular membrane-bounded organelle; GO:0044422 organelle part; GO:0044424 intracellular part; GO:0044434 chloroplast p…	GO:0003824 catalytic activity; GO:0003962 cystathionine gamma-synthase activity; GO:0005488 binding; GO:0008144 drug binding; GO:0016740 transferase activity; GO:0016765 transferase activity, transferring alkyl or aryl (other than methyl) groups; GO:0019842 vitamin binding; GO:0030170 pyridoxal phosphate binding; GO:0036094 small molecule binding; GO:0043167 ion binding; GO:0043168 anion binding;…	K01739	metB; cystathionine gamma-synthase [EC:2.5.1.48]	osa00270 Cysteine and methionine metabolism - Oryza sativa japonica (Japanese rice) (RefSeq); osa00450 Selenocompound metabolism - Oryza sativa japonica (Japanese rice) (RefSeq); osa00920 Sulfur metabolism - Oryza sativa japonica (Japanese rice) (RefSeq); osa01100 Metabolic pathways - Oryza sativa japonica (Japanese rice) (RefSeq); osa01110 Biosynthesis of secondary metabolites - Oryza sativa jap…	PF01053	Cys/Met metabolism PLP-dependent enzyme	E	KOG0053	Cystathionine beta-lyases/cystathionine gamma-synthases	A0A287LWI2	F2CPM8	0.673069
Cluster1	A0A287XXT2	UPF0047 protein C4A8.02c isoform X1(predicted) OS=Hordeum vulgare subsp. vulgare OX=112509 PE=4 SV=1	---	0.811	0.791	0.612	0.818	0.829	0.811	1.199	1.084	1.145	1.286	1.289	1.326	1.548	0.0093362	1.11	0.33906	1.587	1.2452e-06	1.138	0.0134045	chloroplast									S	KOG3267	Uncharacterized conserved protein	A0A287T696	A0A287XXT2	0.430548
Cluster1	A0A287XMI9	Carbonic anhydrase(predicted) OS=Hordeum vulgare subsp. vulgare OX=112509 PE=4 SV=1	---	0.452	0.425	0.376	0.349	0.383	0.424	1.669	1.573	1.472	1.572	1.485	1.821	3.762	3.7165e-05	0.923	0.35866	4.22	6.2123e-05	1.035	0.67672	cytoplasm	GO:0002376 immune system process; GO:0006950 response to stress; GO:0006952 defense response; GO:0006955 immune response; GO:0008152 metabolic process; GO:0009266 response to temperature stimulus; GO:0009409 response to cold; GO:0009605 response to external stimulus; GO:0009607 response to biotic stimulus; GO:0009617 response to bacterium; GO:0009620 response to fungus; GO:0009628 response to abi…	GO:0005576 extracellular region; GO:0005622 intracellular; GO:0005623 cell; GO:0005737 cytoplasm; GO:0005829 cytosol; GO:0005886 plasma membrane; GO:0009507 chloroplast; GO:0009526 plastid envelope; GO:0009532 plastid stroma; GO:0009534 chloroplast thylakoid; GO:0009535 chloroplast thylakoid membrane; GO:0009536 plastid; GO:0009570 chloroplast stroma; GO:0009579 thylakoid; GO:0009941 chloroplast …	GO:0003824 catalytic activity; GO:0004089 carbonate dehydratase activity; GO:0016829 lyase activity; GO:0016835 carbon-oxygen lyase activity; GO:0016836 hydro-lyase activity;	K01673	cynT, can; carbonic anhydrase [EC:4.2.1.1]	osa00910 Nitrogen metabolism - Oryza sativa japonica (Japanese rice) (RefSeq); osa01100 Metabolic pathways - Oryza sativa japonica (Japanese rice) (RefSeq);	PF00484	Carbonic anhydrase	P	KOG1578	Predicted carbonic anhydrase involved in protection against oxidative damage	F2EAD0	A0A287XMI9	0.695944
Cluster1	A0A287XI88	Xyloglucan endotransglucosylase/hydrolase OS=Hordeum vulgare subsp. vulgare OX=112509 PE=3 SV=1	---	0.578	0.557	0.678	0.713	0.679	0.773	1.237	0.911	1.206	1.643	1.386	1.64	1.85	0.0060998	1.194	0.065043	2.157	0.00035512	1.392	0.040744	extracellular				K08235	E2.4.1.207; xyloglucan:xyloglucosyl transferase [EC:2.4.1.207]		PF00722	Glycosyl hydrolases family 16				M0XYI8	A0A287XI88	0.403769
Cluster1	A0A287XFT6	Oxidored_FMN domain-containing protein OS=Hordeum vulgare subsp. vulgare OX=112509 PE=4 SV=1	---	0.793	0.61	0.797	0.629	0.772	0.381	1.378	1.409	1.368	1.193	1.333	1.337	1.889	0.0185025	0.81	0.34276	2.168	0.0187828	0.93	0.126542	chloroplast	GO:0000003 reproduction; GO:0000302 response to reactive oxygen species; GO:0001101 response to acid chemical; GO:0003006 developmental process involved in reproduction; GO:0006082 organic acid metabolic process; GO:0006629 lipid metabolic process; GO:0006631 fatty acid metabolic process; GO:0006633 fatty acid biosynthetic process; GO:0006950 response to stress; GO:0006979 response to oxidative s…	GO:0005622 intracellular; GO:0005623 cell; GO:0005737 cytoplasm; GO:0005777 peroxisome; GO:0042579 microbody; GO:0043226 organelle; GO:0043227 membrane-bounded organelle; GO:0043229 intracellular organelle; GO:0043231 intracellular membrane-bounded organelle; GO:0044424 intracellular part; GO:0044444 cytoplasmic part; GO:0044464 cell part;	GO:0003824 catalytic activity; GO:0005488 binding; GO:0005515 protein binding; GO:0016491 oxidoreductase activity; GO:0016627 oxidoreductase activity, acting on the CH-CH group of donors; GO:0016628 oxidoreductase activity, acting on the CH-CH group of donors, NAD or NADP as acceptor; GO:0016629 12-oxophytodienoate reductase activity; GO:0042802 identical protein binding;	K05894	OPR; 12-oxophytodienoic acid reductase [EC:1.3.1.42]	osa00592 alpha-Linolenic acid metabolism - Oryza sativa japonica (Japanese rice) (RefSeq); osa01100 Metabolic pathways - Oryza sativa japonica (Japanese rice) (RefSeq); osa01110 Biosynthesis of secondary metabolites - Oryza sativa japonica (Japanese rice) (RefSeq);	PF00724	NADH:flavin oxidoreductase / NADH oxidase family	C	KOG0134	NADH:flavin oxidoreductase/12-oxophytodienoate reductase	F2EHA8	A0A287XFT6	0.384836
Cluster1	A0A287X237	Phosphoenolpyruvate carboxylase (Fragment)(predicted) OS=Hordeum vulgare subsp. vulgare OX=112509 PE=4 SV=1	---	0.664	0.675	0.669	0.644	0.656	0.618	1.405	1.413	1.423	1.294	1.244	1.295	2.112	1.2513e-8	0.955	0.064925	1.998	3.0742e-06	0.904	0.00181829	cytoplasm	GO:0001101 response to acid chemical; GO:0009719 response to endogenous stimulus; GO:0009725 response to hormone; GO:0009735 response to cytokinin; GO:0010033 response to organic substance; GO:0010035 response to inorganic substance; GO:0010167 response to nitrate; GO:0042221 response to chemical; GO:0050896 response to stimulus; GO:0060359 response to ammonium ion; GO:1901698 response to nitroge…	GO:0005622 intracellular; GO:0005623 cell; GO:0005737 cytoplasm; GO:0044424 intracellular part; GO:0044464 cell part;	GO:0003824 catalytic activity; GO:0004611 phosphoenolpyruvate carboxykinase activity; GO:0008964 phosphoenolpyruvate carboxylase activity; GO:0016829 lyase activity; GO:0016830 carbon-carbon lyase activity; GO:0016831 carboxy-lyase activity;	K01595	ppc; phosphoenolpyruvate carboxylase [EC:4.1.1.31]	osa00620 Pyruvate metabolism - Oryza sativa japonica (Japanese rice) (RefSeq); osa00710 Carbon fixation in photosynthetic organisms - Oryza sativa japonica (Japanese rice) (RefSeq); osa01100 Metabolic pathways - Oryza sativa japonica (Japanese rice) (RefSeq); osa01200 Carbon metabolism - Oryza sativa japonica (Japanese rice) (RefSeq);						A0A287S3M6	A0A287X237	0.706961
Cluster1	A0A287X1U8	Phosphoenolpyruvate carboxylase 1(predicted) OS=Hordeum vulgare subsp. vulgare OX=112509 PE=4 SV=1	---	0.611	0.644	0.63	0.584	0.542	0.53	1.527	1.482	1.433	1.393	1.338	1.286	2.356	1.7934e-06	0.879	0.0170011	2.426	1.93116e-05	0.904	0.026824	chloroplast	GO:0001101 response to acid chemical; GO:0009719 response to endogenous stimulus; GO:0009725 response to hormone; GO:0009735 response to cytokinin; GO:0010033 response to organic substance; GO:0010035 response to inorganic substance; GO:0010167 response to nitrate; GO:0042221 response to chemical; GO:0050896 response to stimulus; GO:0060359 response to ammonium ion; GO:1901698 response to nitroge…	GO:0005622 intracellular; GO:0005623 cell; GO:0005737 cytoplasm; GO:0044424 intracellular part; GO:0044464 cell part;	GO:0003824 catalytic activity; GO:0004611 phosphoenolpyruvate carboxykinase activity; GO:0008964 phosphoenolpyruvate carboxylase activity; GO:0016829 lyase activity; GO:0016830 carbon-carbon lyase activity; GO:0016831 carboxy-lyase activity;	K01595	ppc; phosphoenolpyruvate carboxylase [EC:4.1.1.31]	osa00620 Pyruvate metabolism - Oryza sativa japonica (Japanese rice) (RefSeq); osa00710 Carbon fixation in photosynthetic organisms - Oryza sativa japonica (Japanese rice) (RefSeq); osa01100 Metabolic pathways - Oryza sativa japonica (Japanese rice) (RefSeq); osa01200 Carbon metabolism - Oryza sativa japonica (Japanese rice) (RefSeq);						M0UZP5	A0A287X1U8	0.702728
Cluster1	A0A287WT02	Transmembrane 9 superfamily member OS=Hordeum vulgare subsp. vulgare OX=112509 PE=3 SV=1	---	0.895	0.834	0.915	0.744	0.789	0.761	1.156	1.263	1.168	1.047	1.199	1.229	1.357	0.00151902	0.868	0.0124605	1.515	0.00142347	0.969	0.59038	nucleus				K17086	TM9SF2_4; transmembrane 9 superfamily member 2/4				U	KOG1278	Endosomal membrane proteins, EMP70	A0A287VB41	A0A287WT02	0.435869
Cluster1	A0A287WPW8	Polyadenylate-binding protein OS=Hordeum vulgare subsp. vulgare OX=112509 PE=3 SV=1	---	0.805	0.948	0.914	0.748	0.808	0.678	1.101	1.278	1.181	1.26	1.119	1.161	1.335	0.0116193	0.838	0.066801	1.585	0.0017028	0.994	0.93238	nucleus	GO:0006412 translation; GO:0006413 translational initiation; GO:0006417 regulation of translation; GO:0006446 regulation of translational initiation; GO:0006518 peptide metabolic process; GO:0006807 nitrogen compound metabolic process; GO:0006950 response to stress; GO:0006970 response to osmotic stress; GO:0008152 metabolic process; GO:0009058 biosynthetic process; GO:0009059 macromolecule biosy…	GO:0005622 intracellular; GO:0005623 cell; GO:0005737 cytoplasm; GO:0005829 cytosol; GO:0044424 intracellular part; GO:0044444 cytoplasmic part; GO:0044464 cell part;	GO:0003676 nucleic acid binding; GO:0003723 RNA binding; GO:0003729 mRNA binding; GO:0003743 translation initiation factor activity; GO:0005488 binding; GO:0008135 translation factor activity, RNA binding; GO:0097159 organic cyclic compound binding; GO:1901363 heterocyclic compound binding;	K13126	PABPC; polyadenylate-binding protein	osa03013 RNA transport - Oryza sativa japonica (Japanese rice) (RefSeq); osa03015 mRNA surveillance pathway - Oryza sativa japonica (Japanese rice) (RefSeq); osa03018 RNA degradation - Oryza sativa japonica (Japanese rice) (RefSeq);	PF00076	RNA recognition motif. (a.k.a. RRM, RBD, or RNP domain)	AJ	KOG0123	Polyadenylate-binding protein (RRM superfamily)	A0A287L2P7	A0A287WPW8	0.365717
Cluster1	A0A287WL38	Reticulocyte-binding protein 2 a(predicted) OS=Hordeum vulgare subsp. vulgare OX=112509 PE=4 SV=1	---	0.837	0.865	0.816	0.84	0.818	0.745	1.104	1.004	1.069	1.417	1.159	1.327	1.262	0.0020592	0.954	0.2996	1.624	0.0022554	1.229	0.036037	nucleus												A0A287S060	A0A287WL38	0.370277
Cluster1	A0A287VPE5	Glycosyltransferase(predicted) OS=Hordeum vulgare subsp. vulgare OX=112509 PE=4 SV=1	---	0.92	0.556	0.776	0.642	0.754	0.504	1.498	1.639	1.343	1.02	1.196	1.152	1.989	0.0112795	0.844	0.4382	1.773	0.0099391	0.752	0.0192609	chloroplast									H	KOG1192	UDP-glucuronosyl and UDP-glucosyl transferase	A0A287GHC1	A0A287VPE5	0.373057
Cluster1	A0A287VJQ7	3-phosphoshikimate 1-carboxyvinyltransferase OS=Hordeum vulgare subsp. vulgare OX=112509 PE=3 SV=1	---	0.858	0.825	0.808	0.622	0.639	0.636	1.378	1.312	1.238	1.178	1.219	1.286	1.577	0.00021837	0.762	0.000155913	1.941	1.79833e-05	0.938	0.185424	cytoplasm	GO:0006082 organic acid metabolic process; GO:0008152 metabolic process; GO:0009058 biosynthetic process; GO:0009423 chorismate biosynthetic process; GO:0009987 cellular process; GO:0016053 organic acid biosynthetic process; GO:0019752 carboxylic acid metabolic process; GO:0043436 oxoacid metabolic process; GO:0043648 dicarboxylic acid metabolic process; GO:0043650 dicarboxylic acid biosynthetic …	GO:0005622 intracellular; GO:0005623 cell; GO:0005737 cytoplasm; GO:0009507 chloroplast; GO:0009532 plastid stroma; GO:0009536 plastid; GO:0009570 chloroplast stroma; GO:0043226 organelle; GO:0043227 membrane-bounded organelle; GO:0043229 intracellular organelle; GO:0043231 intracellular membrane-bounded organelle; GO:0044422 organelle part; GO:0044424 intracellular part; GO:0044434 chloroplast p…	GO:0003824 catalytic activity; GO:0003866 3-phosphoshikimate 1-carboxyvinyltransferase activity; GO:0016740 transferase activity; GO:0016765 transferase activity, transferring alkyl or aryl (other than methyl) groups;	K00800	aroA; 3-phosphoshikimate 1-carboxyvinyltransferase [EC:2.5.1.19]	osa00400 Phenylalanine, tyrosine and tryptophan biosynthesis - Oryza sativa japonica (Japanese rice) (RefSeq); osa01100 Metabolic pathways - Oryza sativa japonica (Japanese rice) (RefSeq); osa01110 Biosynthesis of secondary metabolites - Oryza sativa japonica (Japanese rice) (RefSeq); osa01230 Biosynthesis of amino acids - Oryza sativa japonica (Japanese rice) (RefSeq);			E	KOG0692	Pentafunctional AROM protein	F2CPX2	A0A287VJQ7	0.412269
Cluster1	A0A287VC78	Vacuolar invertase1(predicted) OS=Hordeum vulgare subsp. vulgare OX=112509 PE=3 SV=1	---	0.788	0.821	0.755	0.838	0.819	0.843	1.167	1.205	1.177	1.123	1.227	1.236	1.501	9.8889e-05	1.058	0.093458	1.434	0.00035905	1.01	0.78256	peroxisome	GO:0001101 response to acid chemical; GO:0007275 multicellular organism development; GO:0009605 response to external stimulus; GO:0009607 response to biotic stimulus; GO:0009617 response to bacterium; GO:0009719 response to endogenous stimulus; GO:0009725 response to hormone; GO:0009739 response to gibberellin; GO:0009987 cellular process; GO:0010033 response to organic substance; GO:0022622 root…	GO:0000325 plant-type vacuole; GO:0005618 cell wall; GO:0005622 intracellular; GO:0005623 cell; GO:0005737 cytoplasm; GO:0005773 vacuole; GO:0009505 plant-type cell wall; GO:0030312 external encapsulating structure; GO:0043226 organelle; GO:0043227 membrane-bounded organelle; GO:0043229 intracellular organelle; GO:0043231 intracellular membrane-bounded organelle; GO:0044424 intracellular part; GO…	GO:0003824 catalytic activity; GO:0004553 hydrolase activity, hydrolyzing O-glycosyl compounds; GO:0004564 beta-fructofuranosidase activity; GO:0016787 hydrolase activity; GO:0016798 hydrolase activity, acting on glycosyl bonds;	K21351	SST; sucrose:sucrose fructosyltransferase [EC:2.4.1.99]		PF00251; PF08244	Glycosyl hydrolases family 32 N-terminal domain; Glycosyl hydrolases family 32 C terminal	G	KOG0228	Beta-fructofuranosidase (invertase)	A0A287T0X1	A0A287VC78	0.533315
Cluster1	A0A287V7D1	Aconitate hydratase OS=Hordeum vulgare subsp. vulgare OX=112509 PE=3 SV=1	---	0.667	0.665	0.664	0.72	0.7	0.692	1.277	1.301	1.306	1.322	1.347	1.34	1.946	3.7935e-8	1.058	0.041537	1.898	5.1212e-7	1.032	0.023584	cytoplasm				K01681	ACO, acnA; aconitate hydratase [EC:4.2.1.3]	osa00020 Citrate cycle (TCA cycle) - Oryza sativa japonica (Japanese rice) (RefSeq); osa00630 Glyoxylate and dicarboxylate metabolism - Oryza sativa japonica (Japanese rice) (RefSeq); osa01100 Metabolic pathways - Oryza sativa japonica (Japanese rice) (RefSeq); osa01110 Biosynthesis of secondary metabolites - Oryza sativa japonica (Japanese rice) (RefSeq); osa01200 Carbon metabolism - Oryza sativ…	PF00694	Aconitase C-terminal domain	AJ	KOG0452	RNA-binding translational regulator IRP (aconitase superfamily)	A0A287PQ89	A0A287V7D1	0.638269
Cluster1	A0A287UZC3	Eukaryotic translation initiation factor 3 subunit G OS=Hordeum vulgare subsp. vulgare OX=112509 PE=3 SV=1	---	0.856	0.792	0.686	0.791	0.667	0.726	1.206	1.196	1.269	1.218	1.259	1.334	1.573	0.0024808	0.936	0.47134	1.745	0.00056289	1.038	0.31642	nucleus				K03248	EIF3G; translation initiation factor 3 subunit G	osa03013 RNA transport - Oryza sativa japonica (Japanese rice) (RefSeq);	PF00076	RNA recognition motif. (a.k.a. RRM, RBD, or RNP domain)	J	KOG0122	Translation initiation factor 3, subunit g (eIF-3g)	A0A287DVG9	A0A287UZC3	0.544336
Cluster1	A0A287UW51	Ferredoxin-nitrate reductase(predicted) OS=Hordeum vulgare subsp. vulgare OX=112509 PE=4 SV=1	---	0.642	0.646	0.629	0.717	0.69	0.696	1.283	1.27	1.292	1.358	1.375	1.403	2.006	1.0286e-7	1.097	0.0028202	1.967	7.2524e-7	1.076	0.0024552	cytoplasm	GO:0001101 response to acid chemical; GO:0008152 metabolic process; GO:0010035 response to inorganic substance; GO:0010167 response to nitrate; GO:0042221 response to chemical; GO:0050896 response to stimulus; GO:0055114 oxidation-reduction process; GO:1901698 response to nitrogen compound; GO:1901700 response to oxygen-containing compound;	GO:0005576 extracellular region; GO:0005622 intracellular; GO:0005623 cell; GO:0005737 cytoplasm; GO:0005739 mitochondrion; GO:0009507 chloroplast; GO:0009532 plastid stroma; GO:0009536 plastid; GO:0009570 chloroplast stroma; GO:0016020 membrane; GO:0043226 organelle; GO:0043227 membrane-bounded organelle; GO:0043229 intracellular organelle; GO:0043231 intracellular membrane-bounded organelle; GO…	GO:0003824 catalytic activity; GO:0016491 oxidoreductase activity; GO:0016661 oxidoreductase activity, acting on other nitrogenous compounds as donors; GO:0016662 oxidoreductase activity, acting on other nitrogenous compounds as donors, cytochrome as acceptor; GO:0050421 nitrite reductase (NO-forming) activity; GO:0098809 nitrite reductase activity;	K00366	nirA; ferredoxin-nitrite reductase [EC:1.7.7.1]	osa00910 Nitrogen metabolism - Oryza sativa japonica (Japanese rice) (RefSeq); osa01100 Metabolic pathways - Oryza sativa japonica (Japanese rice) (RefSeq);			P	KOG0560	Sulfite reductase (ferredoxin)	A0A287LL26	A0A287UW51	0.584879
Cluster1	A0A287U928	GrpE protein homolog OS=Hordeum vulgare subsp. vulgare OX=112509 PE=3 SV=1	---	0.982	0.617	0.661	0.682	0.429	0.78	1.317	1.17	1.065	1.335	1.33	1.632	1.572	0.040382	0.837	0.46412	2.272	0.011856	1.21	0.106642	cytoplasm				K03687	GRPE; molecular chaperone GrpE				O	KOG3003	Molecular chaperone of the GrpE family	A0A287FCC2	A0A287U928	0.34227
Cluster1	A0A287U4Y9	Tr-type G domain-containing protein OS=Hordeum vulgare subsp. vulgare OX=112509 PE=4 SV=1	---	0.801	0.81	0.789	0.683	0.603	0.696	1.271	1.209	1.276	1.292	1.256	1.313	1.565	1.95335e-05	0.826	0.0133156	1.948	0.000139886	1.028	0.27028	cytoplasm	GO:0006139 nucleobase-containing compound metabolic process; GO:0006364 rRNA processing; GO:0006396 RNA processing; GO:0006725 cellular aromatic compound metabolic process; GO:0006807 nitrogen compound metabolic process; GO:0006950 response to stress; GO:0008152 metabolic process; GO:0009266 response to temperature stimulus; GO:0009409 response to cold; GO:0009628 response to abiotic stimulus; GO…	GO:0005622 intracellular; GO:0005623 cell; GO:0005737 cytoplasm; GO:0009507 chloroplast; GO:0009536 plastid; GO:0043226 organelle; GO:0043227 membrane-bounded organelle; GO:0043229 intracellular organelle; GO:0043231 intracellular membrane-bounded organelle; GO:0044424 intracellular part; GO:0044444 cytoplasmic part; GO:0044464 cell part;		K06207	typA, bipA; GTP-binding protein		PF00009; PF03144	Elongation factor Tu GTP binding domain; Elongation factor Tu domain 2	J	KOG0462	Elongation factor-type GTP-binding protein	A0A287U4Y9	A0A287U4Y9	0.506843
Cluster1	A0A287U4U9	EFG_C domain-containing protein OS=Hordeum vulgare subsp. vulgare OX=112509 PE=4 SV=1	---	0.849	0.881	0.846	0.689	0.692	0.731	1.232	1.171	1.228	1.239	1.167	1.276	1.41	8.0377e-05	0.82	0.00099559	1.743	6.4138e-05	1.014	0.68484	chloroplast	GO:0006139 nucleobase-containing compound metabolic process; GO:0006364 rRNA processing; GO:0006396 RNA processing; GO:0006725 cellular aromatic compound metabolic process; GO:0006807 nitrogen compound metabolic process; GO:0006950 response to stress; GO:0008152 metabolic process; GO:0009266 response to temperature stimulus; GO:0009409 response to cold; GO:0009628 response to abiotic stimulus; GO…	GO:0005622 intracellular; GO:0005623 cell; GO:0005737 cytoplasm; GO:0009507 chloroplast; GO:0009536 plastid; GO:0043226 organelle; GO:0043227 membrane-bounded organelle; GO:0043229 intracellular organelle; GO:0043231 intracellular membrane-bounded organelle; GO:0044424 intracellular part; GO:0044444 cytoplasmic part; GO:0044464 cell part;		K06207	typA, bipA; GTP-binding protein		PF00679	Elongation factor G C-terminus	J	KOG0462	Elongation factor-type GTP-binding protein	F2DP49	A0A287U4U9	0.418722
Cluster1	A0A287U3X4	Phosphoenolpyruvate carboxylase(predicted) OS=Hordeum vulgare subsp. vulgare OX=112509 PE=3 SV=1	---	0.742	0.803	0.77	0.688	0.649	0.611	1.396	1.356	1.414	1.205	1.188	1.177	1.8	2.1272e-05	0.841	0.0136016	1.833	6.2244e-05	0.857	0.00040093	cytoplasm		GO:0005622 intracellular; GO:0005623 cell; GO:0005737 cytoplasm; GO:0044424 intracellular part; GO:0044464 cell part;		K01595	ppc; phosphoenolpyruvate carboxylase [EC:4.1.1.31]	osa00620 Pyruvate metabolism - Oryza sativa japonica (Japanese rice) (RefSeq); osa00710 Carbon fixation in photosynthetic organisms - Oryza sativa japonica (Japanese rice) (RefSeq); osa01100 Metabolic pathways - Oryza sativa japonica (Japanese rice) (RefSeq); osa01200 Carbon metabolism - Oryza sativa japonica (Japanese rice) (RefSeq);						A0A287Q8X7	A0A287U3X4	0.540441
Cluster1	A0A287TPD0	Tubulin beta chain OS=Hordeum vulgare subsp. vulgare OX=112509 PE=3 SV=1	---	0.489	0.771	0.524	0.337	0.573	0.702	1.778	1.978	0.845	1.444	1.366	1.193	2.579	0.040536	0.904	0.6552	2.483	0.0135954	0.87	0.79016	cytoplasm				K07375	TUBB; tubulin beta	osa04145 Phagosome - Oryza sativa japonica (Japanese rice) (RefSeq);	PF00091; PF03953	Tubulin/FtsZ family, GTPase domain; Tubulin C-terminal domain	Z	KOG1375	Beta tubulin	A0A287XXT2	A0A287TPD0	0.371284
Cluster1	A0A287TM13	Peroxisomal fatty acid beta-oxidation multifunctional protein(predicted) OS=Hordeum vulgare subsp. vulgare OX=112509 PE=3 SV=1	---	0.881	0.838	0.876	0.675	0.562	0.655	1.474	1.491	1.312	1.133	1.048	1.056	1.648	0.00034041	0.729	0.0056386	1.711	0.00095765	0.757	0.0043785	plasma membrane	GO:0006082 organic acid metabolic process; GO:0006629 lipid metabolic process; GO:0006631 fatty acid metabolic process; GO:0006635 fatty acid beta-oxidation; GO:0008152 metabolic process; GO:0009056 catabolic process; GO:0009062 fatty acid catabolic process; GO:0009987 cellular process; GO:0016042 lipid catabolic process; GO:0016054 organic acid catabolic process; GO:0019395 fatty acid oxidation;…	GO:0005622 intracellular; GO:0005623 cell; GO:0005737 cytoplasm; GO:0005777 peroxisome; GO:0042579 microbody; GO:0043226 organelle; GO:0043227 membrane-bounded organelle; GO:0043229 intracellular organelle; GO:0043231 intracellular membrane-bounded organelle; GO:0044424 intracellular part; GO:0044444 cytoplasmic part; GO:0044464 cell part;	GO:0003676 nucleic acid binding; GO:0003723 RNA binding; GO:0003729 mRNA binding; GO:0003824 catalytic activity; GO:0003857 3-hydroxyacyl-CoA dehydrogenase activity; GO:0004165 dodecenoyl-CoA delta-isomerase activity; GO:0004300 enoyl-CoA hydratase activity; GO:0005488 binding; GO:0005515 protein binding; GO:0008017 microtubule binding; GO:0008092 cytoskeletal protein binding; GO:0008692 3-hydrox…	K10527	MFP2; enoyl-CoA hydratase/3-hydroxyacyl-CoA dehydrogenase [EC:4.2.1.17 1.1.1.35 1.1.1.211]	osa00071 Fatty acid degradation - Oryza sativa japonica (Japanese rice) (RefSeq); osa00592 alpha-Linolenic acid metabolism - Oryza sativa japonica (Japanese rice) (RefSeq); osa01100 Metabolic pathways - Oryza sativa japonica (Japanese rice) (RefSeq); osa01110 Biosynthesis of secondary metabolites - Oryza sativa japonica (Japanese rice) (RefSeq); osa01212 Fatty acid metabolism - Oryza sativa japon…	PF00378; PF02737; PF00725	Enoyl-CoA hydratase/isomerase family; 3-hydroxyacyl-CoA dehydrogenase, NAD binding domain; 3-hydroxyacyl-CoA dehydrogenase, C-terminal domain	I	KOG1683	Hydroxyacyl-CoA dehydrogenase/enoyl-CoA hydratase	F2E1P5	A0A287TM13	0.343558
Cluster1	A0A287T0X1	Arf-GAP domain-containing protein OS=Hordeum vulgare subsp. vulgare OX=112509 PE=4 SV=1	---	0.692	0.705	0.856	0.727	0.799	0.817	1.158	1.257	1.188	1.299	1.221	1.28	1.599	0.0027961	1.04	0.60864	1.622	0.00027797	1.055	0.155401	nucleus	GO:0000003 reproduction; GO:0001101 response to acid chemical; GO:0003006 developmental process involved in reproduction; GO:0007275 multicellular organism development; GO:0009555 pollen development; GO:0009719 response to endogenous stimulus; GO:0009725 response to hormone; GO:0009737 response to abscisic acid; GO:0009790 embryo development; GO:0009791 post-embryonic development; GO:0009793 embr…	GO:0005622 intracellular; GO:0005623 cell; GO:0005737 cytoplasm; GO:0005829 cytosol; GO:0044424 intracellular part; GO:0044444 cytoplasmic part; GO:0044464 cell part;		K12493	ARFGAP2_3; ADP-ribosylation factor GTPase-activating protein 2/3	osa04144 Endocytosis - Oryza sativa japonica (Japanese rice) (RefSeq);	PF01412	Putative GTPase activating protein for Arf	T	KOG0706	Predicted GTPase-activating protein	A0A287TZY4	A0A287T0X1	0.497054
Cluster1	A0A287SUL6	AB hydrolase-1 domain-containing protein OS=Hordeum vulgare subsp. vulgare OX=112509 PE=4 SV=1	---	0.805	0.743	0.307	0.745	0.462	0.657	1.361	1.418	1.38	1.263	1.426	1.432	2.242	0.10212	1.005	0.84834	2.211	0.0054994	0.991	0.81526	cytoplasm							PF12697	Alpha/beta hydrolase family	I	KOG4178	Soluble epoxide hydrolase	A0A287LEJ5	A0A287SUL6	0.377869
Cluster1	A0A287SIW8	Ferredoxin--NADP reductase, chloroplastic OS=Hordeum vulgare subsp. vulgare OX=112509 PE=3 SV=1	---	0.498	0.519	0.51	0.527	0.548	0.555	1.466	1.402	1.433	1.524	1.514	1.502	2.817	2.4919e-7	1.067	0.029441	2.785	1.842e-7	1.056	0.0161212	nucleus		GO:0005622 intracellular; GO:0005623 cell; GO:0005737 cytoplasm; GO:0009507 chloroplast; GO:0009534 chloroplast thylakoid; GO:0009535 chloroplast thylakoid membrane; GO:0009536 plastid; GO:0009579 thylakoid; GO:0016020 membrane; GO:0031976 plastid thylakoid; GO:0031984 organelle subcompartment; GO:0032991 macromolecular complex; GO:0034357 photosynthetic membrane; GO:0042651 thylakoid membrane; G…		K02641	petH; ferredoxin--NADP+ reductase [EC:1.18.1.2]	osa00195 Photosynthesis - Oryza sativa japonica (Japanese rice) (RefSeq); osa01100 Metabolic pathways - Oryza sativa japonica (Japanese rice) (RefSeq);	PF00175	Oxidoreductase NAD-binding domain	C	KOG1158	NADP/FAD dependent oxidoreductase	A0A287X6N5	A0A287SIW8	0.657387
Cluster1	A0A287SHW0	Tubulin beta chain OS=Hordeum vulgare subsp. vulgare OX=112509 PE=3 SV=1	---	0.634	0.598	0.616	0.469	0.531	0.513	1.593	1.649	1.616	1.273	1.233	1.274	2.629	5.084e-7	0.819	0.0077965	2.498	1.92563e-05	0.778	6.4689e-05	mitochondria		GO:0005622 intracellular; GO:0005623 cell; GO:0005856 cytoskeleton; GO:0043226 organelle; GO:0043228 non-membrane-bounded organelle; GO:0043229 intracellular organelle; GO:0043232 intracellular non-membrane-bounded organelle; GO:0044424 intracellular part; GO:0044464 cell part;		K07375	TUBB; tubulin beta	osa04145 Phagosome - Oryza sativa japonica (Japanese rice) (RefSeq);	PF00091; PF03953	Tubulin/FtsZ family, GTPase domain; Tubulin C-terminal domain	Z	KOG1375	Beta tubulin	A0A287MQ83	A0A287SHW0	0.578215
Cluster1	A0A287RR21	Glycosyltransferase OS=Hordeum vulgare subsp. vulgare OX=112509 PE=3 SV=1	---	0.674	0.732	0.733	0.744	0.84	0.664	1.255	1.272	1.292	1.257	1.288	1.249	1.785	3.8372e-05	1.051	0.56568	1.688	0.0164385	0.993	0.6283	cytoplasm				K13030	UGT85B1; cyanohydrin beta-glucosyltransferase [EC:2.4.1.85]				CG	KOG1192	UDP-glucuronosyl and UDP-glucosyl transferase	F2D1J5	A0A287RR21	0.526768
Cluster1	A0A287R987	Bifunctional aspartokinase/homoserine dehydrogenase 2, chloroplastic(predicted) OS=Hordeum vulgare subsp. vulgare OX=112509 PE=4 SV=1	---	0.587	0.587	0.592	0.625	0.62	0.652	1.336	1.302	1.335	1.475	1.449	1.441	2.25	4.4125e-8	1.074	0.0108585	2.301	5.3255e-7	1.099	0.00102417	chloroplast	GO:0006082 organic acid metabolic process; GO:0006520 cellular amino acid metabolic process; GO:0006793 phosphorus metabolic process; GO:0006796 phosphate-containing compound metabolic process; GO:0006807 nitrogen compound metabolic process; GO:0008152 metabolic process; GO:0008652 cellular amino acid biosynthetic process; GO:0009058 biosynthetic process; GO:0009069 serine family amino acid metab…	GO:0005622 intracellular; GO:0005623 cell; GO:0005737 cytoplasm; GO:0009507 chloroplast; GO:0009532 plastid stroma; GO:0009536 plastid; GO:0009570 chloroplast stroma; GO:0043226 organelle; GO:0043227 membrane-bounded organelle; GO:0043229 intracellular organelle; GO:0043231 intracellular membrane-bounded organelle; GO:0044422 organelle part; GO:0044424 intracellular part; GO:0044434 chloroplast p…	GO:0003824 catalytic activity; GO:0004072 aspartate kinase activity; GO:0004412 homoserine dehydrogenase activity; GO:0016301 kinase activity; GO:0016491 oxidoreductase activity; GO:0016614 oxidoreductase activity, acting on CH-OH group of donors; GO:0016616 oxidoreductase activity, acting on the CH-OH group of donors, NAD or NADP as acceptor; GO:0016740 transferase activity; GO:0016772 transfera…	K12524	thrA; bifunctional aspartokinase / homoserine dehydrogenase 1 [EC:2.7.2.4 1.1.1.3]	osa00260 Glycine, serine and threonine metabolism - Oryza sativa japonica (Japanese rice) (RefSeq); osa00261 Monobactam biosynthesis - Oryza sativa japonica (Japanese rice) (RefSeq); osa00270 Cysteine and methionine metabolism - Oryza sativa japonica (Japanese rice) (RefSeq); osa00300 Lysine biosynthesis - Oryza sativa japonica (Japanese rice) (RefSeq); osa01100 Metabolic pathways - Oryza sativa …	PF01842; PF03447; PF00742	ACT domain; Homoserine dehydrogenase, NAD binding domain; Homoserine dehydrogenase				A0A287EUP1	A0A287R987	0.6179
Cluster1	A0A287Q8X7	Cysteine synthase OS=Hordeum vulgare subsp. vulgare OX=112509 PE=3 SV=1	---	0.782	0.785	0.797	0.814	0.764	0.818	1.224	1.24	1.229	1.183	1.172	1.193	1.562	1.7688e-7	1.014	0.59824	1.481	6.1993e-05	0.961	0.0033243	mitochondria	GO:0000003 reproduction; GO:0000096 sulfur amino acid metabolic process; GO:0000097 sulfur amino acid biosynthetic process; GO:0000902 cell morphogenesis; GO:0000904 cell morphogenesis involved in differentiation; GO:0003006 developmental process involved in reproduction; GO:0006082 organic acid metabolic process; GO:0006520 cellular amino acid metabolic process; GO:0006534 cysteine metabolic pro…	GO:0005576 extracellular region; GO:0005622 intracellular; GO:0005623 cell; GO:0005634 nucleus; GO:0005737 cytoplasm; GO:0005773 vacuole; GO:0005774 vacuolar membrane; GO:0005777 peroxisome; GO:0005829 cytosol; GO:0005886 plasma membrane; GO:0009507 chloroplast; GO:0009532 plastid stroma; GO:0009536 plastid; GO:0009570 chloroplast stroma; GO:0016020 membrane; GO:0031090 organelle membrane; GO:004…	GO:0003824 catalytic activity; GO:0004124 cysteine synthase activity; GO:0005488 binding; GO:0008144 drug binding; GO:0016740 transferase activity; GO:0016765 transferase activity, transferring alkyl or aryl (other than methyl) groups; GO:0019842 vitamin binding; GO:0030170 pyridoxal phosphate binding; GO:0036094 small molecule binding; GO:0043167 ion binding; GO:0043168 anion binding; GO:0048037…	K01738	cysK; cysteine synthase A [EC:2.5.1.47]	osa00270 Cysteine and methionine metabolism - Oryza sativa japonica (Japanese rice) (RefSeq); osa00920 Sulfur metabolism - Oryza sativa japonica (Japanese rice) (RefSeq); osa01100 Metabolic pathways - Oryza sativa japonica (Japanese rice) (RefSeq); osa01110 Biosynthesis of secondary metabolites - Oryza sativa japonica (Japanese rice) (RefSeq); osa01200 Carbon metabolism - Oryza sativa japonica (J…			E	KOG1252	Cystathionine beta-synthase and related enzymes	A0A287T1I8	A0A287Q8X7	0.647969
Cluster1	A0A287Q396	AP-2 complex subunit alpha OS=Hordeum vulgare subsp. vulgare OX=112509 PE=3 SV=1	---	0.886	0.836	0.726	0.688	0.636	0.726	1.394	1.206	1.402	1.288	1.154	1.058	1.635	0.0030608	0.837	0.067642	1.707	0.00148189	0.875	0.14762	cytoplasm		GO:0005623 cell; GO:0005886 plasma membrane; GO:0016020 membrane; GO:0044464 cell part; GO:0071944 cell periphery;		K11824	AP2A; AP-2 complex subunit alpha	osa04144 Endocytosis - Oryza sativa japonica (Japanese rice) (RefSeq);	PF02883	Adaptin C-terminal domain	U	KOG1077	Vesicle coat complex AP-2, alpha subunit	J7GP58	A0A287Q396	0.434644
Cluster1	A0A287PYU0	NAC-A/B domain-containing protein OS=Hordeum vulgare subsp. vulgare OX=112509 PE=4 SV=1	---	0.646	0.609	0.648	0.631	0.59	0.616	1.285	1.306	1.293	1.448	1.503	1.425	2.041	2.1261e-06	0.965	0.27882	2.382	2.1208e-06	1.127	0.00194368	chloroplast				K03626	EGD2, NACA; nascent polypeptide-associated complex subunit alpha				K	KOG2239	Transcription factor containing NAC and TS-N domains	A0A287TN02	A0A287PYU0	0.648381
Cluster1	A0A287PWE6	Anthranilate phosphoribosyltransferase, chloroplastic(predicted) OS=Hordeum vulgare subsp. vulgare OX=112509 PE=3 SV=1	---	0.686	0.677	0.682	0.523	0.535	0.541	1.428	1.435	1.42	1.363	1.35	1.359	2.094	5.6944e-9	0.782	2.0443e-05	2.547	4.5057e-8	0.951	0.00026111	cytoplasm	GO:0000162 tryptophan biosynthetic process; GO:0006082 organic acid metabolic process; GO:0006520 cellular amino acid metabolic process; GO:0006568 tryptophan metabolic process; GO:0006576 cellular biogenic amine metabolic process; GO:0006586 indolalkylamine metabolic process; GO:0006725 cellular aromatic compound metabolic process; GO:0006807 nitrogen compound metabolic process; GO:0008152 metab…	GO:0005622 intracellular; GO:0005623 cell; GO:0005737 cytoplasm; GO:0009507 chloroplast; GO:0009526 plastid envelope; GO:0009532 plastid stroma; GO:0009536 plastid; GO:0009570 chloroplast stroma; GO:0009941 chloroplast envelope; GO:0031967 organelle envelope; GO:0031975 envelope; GO:0043226 organelle; GO:0043227 membrane-bounded organelle; GO:0043229 intracellular organelle; GO:0043231 intracellu…	GO:0003824 catalytic activity; GO:0004048 anthranilate phosphoribosyltransferase activity; GO:0016740 transferase activity; GO:0016757 transferase activity, transferring glycosyl groups; GO:0016763 transferase activity, transferring pentosyl groups;	K00766	trpD; anthranilate phosphoribosyltransferase [EC:2.4.2.18]	osa00400 Phenylalanine, tyrosine and tryptophan biosynthesis - Oryza sativa japonica (Japanese rice) (RefSeq); osa01100 Metabolic pathways - Oryza sativa japonica (Japanese rice) (RefSeq); osa01110 Biosynthesis of secondary metabolites - Oryza sativa japonica (Japanese rice) (RefSeq); osa01230 Biosynthesis of amino acids - Oryza sativa japonica (Japanese rice) (RefSeq);	PF02885	Glycosyl transferase family, helical bundle domain	E	KOG1438	Anthranilate phosphoribosyltransferase	A0A287T8X6	A0A287PWE6	0.628966
Cluster1	A0A287PUD3	ATP phosphoribosyltransferase(predicted) OS=Hordeum vulgare subsp. vulgare OX=112509 PE=4 SV=1	---	0.76	0.74	0.725	0.682	0.54	0.571	1.261	1.144	1.235	1.482	1.528	1.333	1.636	0.000116366	0.806	0.036983	2.422	0.00040277	1.193	0.025936	nucleus	GO:0000105 histidine biosynthetic process; GO:0006082 organic acid metabolic process; GO:0006520 cellular amino acid metabolic process; GO:0006547 histidine metabolic process; GO:0006725 cellular aromatic compound metabolic process; GO:0006807 nitrogen compound metabolic process; GO:0008152 metabolic process; GO:0008652 cellular amino acid biosynthetic process; GO:0009058 biosynthetic process; GO…	GO:0005622 intracellular; GO:0005623 cell; GO:0005737 cytoplasm; GO:0009507 chloroplast; GO:0009532 plastid stroma; GO:0009536 plastid; GO:0009570 chloroplast stroma; GO:0043226 organelle; GO:0043227 membrane-bounded organelle; GO:0043229 intracellular organelle; GO:0043231 intracellular membrane-bounded organelle; GO:0044422 organelle part; GO:0044424 intracellular part; GO:0044434 chloroplast p…	GO:0003824 catalytic activity; GO:0003879 ATP phosphoribosyltransferase activity; GO:0016740 transferase activity; GO:0016757 transferase activity, transferring glycosyl groups; GO:0016763 transferase activity, transferring pentosyl groups;	K00765	hisG; ATP phosphoribosyltransferase [EC:2.4.2.17]	osa00340 Histidine metabolism - Oryza sativa japonica (Japanese rice) (RefSeq); osa01100 Metabolic pathways - Oryza sativa japonica (Japanese rice) (RefSeq); osa01110 Biosynthesis of secondary metabolites - Oryza sativa japonica (Japanese rice) (RefSeq); osa01230 Biosynthesis of amino acids - Oryza sativa japonica (Japanese rice) (RefSeq);	PF08029	HisG, C-terminal domain	E	KOG2831	ATP phosphoribosyltransferase	A0A287SGW4	A0A287PUD3	0.417477
Cluster1	A0A287PQ89	Putative O-methyltransferase 2(predicted) OS=Hordeum vulgare subsp. vulgare OX=112509 PE=3 SV=1	---	0.806	0.781	0.797	0.772	0.803	0.825	1.258	1.284	1.263	1.111	1.166	1.134	1.596	9.6508e-7	1.007	0.77938	1.421	0.000121294	0.896	0.0020394	cytoskeleton							PF08100; PF00891	Dimerisation domain; O-methyltransferase	S	KOG3178	Hydroxyindole-O-methyltransferase and related SAM-dependent methyltransferases	F2CRC1	A0A287PQ89	0.471508
Cluster1	A0A287N3H4	Dynamin-related protein 1C(predicted) OS=Hordeum vulgare subsp. vulgare OX=112509 PE=3 SV=1	---	0.829	0.748	0.816	0.78	0.704	0.71	1.214	1.224	1.297	1.215	1.225	1.238	1.561	0.00030326	0.917	0.130855	1.676	9.9934e-05	0.985	0.52468	chloroplast	GO:0000266 mitochondrial fission; GO:0006996 organelle organization; GO:0007005 mitochondrion organization; GO:0007275 multicellular organism development; GO:0009555 pollen development; GO:0009987 cellular process; GO:0010152 pollen maturation; GO:0016043 cellular component organization; GO:0021700 developmental maturation; GO:0032501 multicellular organismal process; GO:0032502 developmental pro…	GO:0005622 intracellular; GO:0005623 cell; GO:0005737 cytoplasm; GO:0005886 plasma membrane; GO:0005911 cell-cell junction; GO:0005938 cell cortex; GO:0009504 cell plate; GO:0009506 plasmodesma; GO:0016020 membrane; GO:0030054 cell junction; GO:0044424 intracellular part; GO:0044444 cytoplasmic part; GO:0044464 cell part; GO:0055044 symplast; GO:0071944 cell periphery; GO:0099568 cytoplasmic regi…	GO:0003824 catalytic activity; GO:0003924 GTPase activity; GO:0005488 binding; GO:0005515 protein binding; GO:0008017 microtubule binding; GO:0008092 cytoskeletal protein binding; GO:0015631 tubulin binding; GO:0016462 pyrophosphatase activity; GO:0016787 hydrolase activity; GO:0016817 hydrolase activity, acting on acid anhydrides; GO:0016818 hydrolase activity, acting on acid anhydrides, in phos…				PF00350	Dynamin family	U	KOG0446	Vacuolar sorting protein VPS1, dynamin, and related proteins	M0YMB3	A0A287N3H4	0.631834
Cluster1	A0A287N0S2	Expressed protein(predicted) OS=Hordeum vulgare subsp. vulgare OX=112509 PE=4 SV=1	---	0.847	0.911	0.678	0.806	0.755	0.811	1.237	1.274	1.208	1.13	1.133	1.209	1.527	0.008804	0.974	0.84256	1.464	0.00027928	0.934	0.062519	cytoplasm												A0A287HUJ6	A0A287N0S2	0.460947
Cluster1	A0A287MWM4	40S ribosomal protein S25 OS=Hordeum vulgare subsp. vulgare OX=112509 PE=3 SV=1	---	0.976	0.813	0.87	0.634	0.578	0.848	1.351	1.44	1.394	1.145	1.1	0.85	1.574	0.00127643	0.775	0.104641	1.502	0.049983	0.74	0.031185	nucleus				K02975	RP-S25e, RPS25; small subunit ribosomal protein S25e	osa03010 Ribosome - Oryza sativa japonica (Japanese rice) (RefSeq);			J	KOG1767	40S ribosomal protein S25	A0A287HIL4	A0A287MWM4	0.309236
Cluster1	A0A287LTT9	Tubulin beta chain OS=Hordeum vulgare subsp. vulgare OX=112509 PE=3 SV=1	---	0.546	0.543	0.506	0.503	0.399	0.393	1.596	1.707	1.644	1.377	1.424	1.362	3.102	1.7395e-06	0.812	0.062262	3.215	0.000135763	0.842	0.0018776	nucleus		GO:0005622 intracellular; GO:0005623 cell; GO:0005856 cytoskeleton; GO:0043226 organelle; GO:0043228 non-membrane-bounded organelle; GO:0043229 intracellular organelle; GO:0043232 intracellular non-membrane-bounded organelle; GO:0044424 intracellular part; GO:0044464 cell part;		K07375	TUBB; tubulin beta	osa04145 Phagosome - Oryza sativa japonica (Japanese rice) (RefSeq);	PF00091; PF03953	Tubulin/FtsZ family, GTPase domain; Tubulin C-terminal domain	Z	KOG1375	Beta tubulin	A0A287M050	A0A287LTT9	0.649076
Cluster1	A0A287LHF7	HABP4_PAI-RBP1 domain-containing protein OS=Hordeum vulgare subsp. vulgare OX=112509 PE=4 SV=1	---	0.64	0.639	0.654	0.772	0.784	0.776	0.985	1.237	1.09	1.498	1.429	1.495	1.713	0.0150631	1.206	2.3983e-05	1.896	1.1839e-06	1.335	0.0123241	chloroplast	GO:0001101 response to acid chemical; GO:0006950 response to stress; GO:0006970 response to osmotic stress; GO:0009628 response to abiotic stimulus; GO:0009651 response to salt stress; GO:0009719 response to endogenous stimulus; GO:0009725 response to hormone; GO:0009735 response to cytokinin; GO:0009737 response to abscisic acid; GO:0009787 regulation of abscisic acid-activated signaling pathway…	GO:0005622 intracellular; GO:0005623 cell; GO:0005634 nucleus; GO:0005737 cytoplasm; GO:0005777 peroxisome; GO:0005829 cytosol; GO:0005886 plasma membrane; GO:0016020 membrane; GO:0042579 microbody; GO:0043226 organelle; GO:0043227 membrane-bounded organelle; GO:0043229 intracellular organelle; GO:0043231 intracellular membrane-bounded organelle; GO:0044424 intracellular part; GO:0044444 cytoplas…	GO:0003676 nucleic acid binding; GO:0003723 RNA binding; GO:0003729 mRNA binding; GO:0005488 binding; GO:0097159 organic cyclic compound binding; GO:1901363 heterocyclic compound binding;	K13199	SERBP1; plasminogen activator inhibitor 1 RNA-binding protein				S	KOG2945	Predicted RNA-binding protein	F2DE22	A0A287LHF7	0.410701
Cluster1	A0A287LB74	NADH-dependent glutamate synthase (Fragment)(predicted) OS=Hordeum vulgare subsp. vulgare OX=112509 PE=4 SV=1	---	0.733	0.748	0.693	0.681	0.685	0.657	1.428	1.46	1.428	1.213	1.123	1.15	1.985	4.4576e-06	0.931	0.052803	1.723	3.6068e-05	0.808	0.00086425	cytoplasm	GO:0006082 organic acid metabolic process; GO:0006520 cellular amino acid metabolic process; GO:0006536 glutamate metabolic process; GO:0006537 glutamate biosynthetic process; GO:0006541 glutamine metabolic process; GO:0006807 nitrogen compound metabolic process; GO:0008152 metabolic process; GO:0008652 cellular amino acid biosynthetic process; GO:0009058 biosynthetic process; GO:0009064 glutamin…	GO:0005622 intracellular; GO:0005623 cell; GO:0005737 cytoplasm; GO:0009507 chloroplast; GO:0009532 plastid stroma; GO:0009536 plastid; GO:0009570 chloroplast stroma; GO:0043226 organelle; GO:0043227 membrane-bounded organelle; GO:0043229 intracellular organelle; GO:0043231 intracellular membrane-bounded organelle; GO:0044422 organelle part; GO:0044424 intracellular part; GO:0044434 chloroplast p…	GO:0003824 catalytic activity; GO:0015930 glutamate synthase activity; GO:0016040 glutamate synthase (NADH) activity; GO:0016491 oxidoreductase activity; GO:0016638 oxidoreductase activity, acting on the CH-NH2 group of donors; GO:0016639 oxidoreductase activity, acting on the CH-NH2 group of donors, NAD or NADP as acceptor; GO:0045181 glutamate synthase activity, NAD(P)H as acceptor;	K00264	GLT1; glutamate synthase (NADPH/NADH) [EC:1.4.1.13 1.4.1.14]	osa00250 Alanine, aspartate and glutamate metabolism - Oryza sativa japonica (Japanese rice) (RefSeq); osa00910 Nitrogen metabolism - Oryza sativa japonica (Japanese rice) (RefSeq); osa01100 Metabolic pathways - Oryza sativa japonica (Japanese rice) (RefSeq); osa01110 Biosynthesis of secondary metabolites - Oryza sativa japonica (Japanese rice) (RefSeq); osa01230 Biosynthesis of amino acids - Ory…	PF07992	Pyridine nucleotide-disulphide oxidoreductase	E	KOG0399	Glutamate synthase	A0A287JHB0	A0A287LB74	0.492185
Cluster1	A0A287LB65	Glutamine amidotransferase type-2 domain-containing protein OS=Hordeum vulgare subsp. vulgare OX=112509 PE=4 SV=1	---	0.82	0.784	0.764	0.668	0.747	0.668	1.386	1.372	1.443	1.114	1.091	1.144	1.774	2.2083e-05	0.88	0.038678	1.608	0.00027869	0.797	0.00039534	chloroplast	GO:0006082 organic acid metabolic process; GO:0006520 cellular amino acid metabolic process; GO:0006536 glutamate metabolic process; GO:0006537 glutamate biosynthetic process; GO:0006541 glutamine metabolic process; GO:0006807 nitrogen compound metabolic process; GO:0008152 metabolic process; GO:0008652 cellular amino acid biosynthetic process; GO:0009058 biosynthetic process; GO:0009064 glutamin…	GO:0005622 intracellular; GO:0005623 cell; GO:0005737 cytoplasm; GO:0009507 chloroplast; GO:0009532 plastid stroma; GO:0009536 plastid; GO:0009570 chloroplast stroma; GO:0043226 organelle; GO:0043227 membrane-bounded organelle; GO:0043229 intracellular organelle; GO:0043231 intracellular membrane-bounded organelle; GO:0044422 organelle part; GO:0044424 intracellular part; GO:0044434 chloroplast p…	GO:0003824 catalytic activity; GO:0015930 glutamate synthase activity; GO:0016040 glutamate synthase (NADH) activity; GO:0016491 oxidoreductase activity; GO:0016638 oxidoreductase activity, acting on the CH-NH2 group of donors; GO:0016639 oxidoreductase activity, acting on the CH-NH2 group of donors, NAD or NADP as acceptor; GO:0045181 glutamate synthase activity, NAD(P)H as acceptor;	K00264	GLT1; glutamate synthase (NADPH/NADH) [EC:1.4.1.13 1.4.1.14]	osa00250 Alanine, aspartate and glutamate metabolism - Oryza sativa japonica (Japanese rice) (RefSeq); osa00910 Nitrogen metabolism - Oryza sativa japonica (Japanese rice) (RefSeq); osa01100 Metabolic pathways - Oryza sativa japonica (Japanese rice) (RefSeq); osa01110 Biosynthesis of secondary metabolites - Oryza sativa japonica (Japanese rice) (RefSeq); osa01230 Biosynthesis of amino acids - Ory…	PF00310; PF04898; PF01645	Glutamine amidotransferases class-II; Glutamate synthase central domain; Conserved region in glutamate synthase	E	KOG0399	Glutamate synthase	A0A287SHQ9	A0A287LB65	0.450959
Cluster1	A0A287L247	PNP_UDP_1 domain-containing protein OS=Hordeum vulgare subsp. vulgare OX=112509 PE=4 SV=1	---	0.728	0.714	0.68	0.584	0.609	0.642	1.411	1.556	1.387	1.277	1.21	1.201	2.052	6.1722e-05	0.865	0.0129207	2.01	3.5688e-05	0.847	0.0153839	chloroplast							PF01048	Phosphorylase superfamily				M0XXR9	A0A287L247	0.584958
Cluster1	A0A287KXN1	Sad1(predicted) OS=Hordeum vulgare subsp. vulgare OX=112509 PE=3 SV=1	---	0.778	0.869	0.747	0.737	0.654	0.699	1.457	1.389	1.43	1.099	1.074	1.067	1.786	0.00025528	0.873	0.076717	1.55	0.00025514	0.758	7.7096e-05	cytoplasm	GO:0000003 reproduction; GO:0003006 developmental process involved in reproduction; GO:0006082 organic acid metabolic process; GO:0007275 multicellular organism development; GO:0008152 metabolic process; GO:0009058 biosynthetic process; GO:0009423 chorismate biosynthetic process; GO:0009790 embryo development; GO:0009791 post-embryonic development; GO:0009793 embryo development ending in seed dor…	GO:0005622 intracellular; GO:0005623 cell; GO:0005737 cytoplasm; GO:0009507 chloroplast; GO:0009532 plastid stroma; GO:0009536 plastid; GO:0009570 chloroplast stroma; GO:0043226 organelle; GO:0043227 membrane-bounded organelle; GO:0043229 intracellular organelle; GO:0043231 intracellular membrane-bounded organelle; GO:0044422 organelle part; GO:0044424 intracellular part; GO:0044434 chloroplast p…	GO:0003824 catalytic activity; GO:0004764 shikimate 3-dehydrogenase (NADP+) activity; GO:0016491 oxidoreductase activity; GO:0016614 oxidoreductase activity, acting on CH-OH group of donors; GO:0016616 oxidoreductase activity, acting on the CH-OH group of donors, NAD or NADP as acceptor;	K13832	aroDE, DHQ-SDH; 3-dehydroquinate dehydratase / shikimate dehydrogenase [EC:4.2.1.10 1.1.1.25]	osa00400 Phenylalanine, tyrosine and tryptophan biosynthesis - Oryza sativa japonica (Japanese rice) (RefSeq); osa01100 Metabolic pathways - Oryza sativa japonica (Japanese rice) (RefSeq); osa01110 Biosynthesis of secondary metabolites - Oryza sativa japonica (Japanese rice) (RefSeq); osa01230 Biosynthesis of amino acids - Oryza sativa japonica (Japanese rice) (RefSeq);	PF01487; PF08501	Type I 3-dehydroquinase; Shikimate dehydrogenase substrate binding domain	E	KOG0692	Pentafunctional AROM protein	A0A287FIT6	A0A287KXN1	0.402862
Cluster1	A0A287K2I6	Non-specific lipid-transfer protein OS=Hordeum vulgare subsp. vulgare OX=112509 PE=3 SV=1	---	0.695	0.873	0.85	0.598	0.733	0.651	1.32	1.563	1.474	0.997	1.095	1.151	1.802	0.0024822	0.82	0.101416	1.636	0.0024216	0.744	0.0105617	chloroplast	GO:0001101 response to acid chemical; GO:0006810 transport; GO:0006869 lipid transport; GO:0006950 response to stress; GO:0006970 response to osmotic stress; GO:0009414 response to water deprivation; GO:0009415 response to water; GO:0009628 response to abiotic stimulus; GO:0009651 response to salt stress; GO:0009719 response to endogenous stimulus; GO:0009725 response to hormone; GO:0009737 respo…	GO:0005576 extracellular region; GO:0005618 cell wall; GO:0005623 cell; GO:0016020 membrane; GO:0030312 external encapsulating structure; GO:0044464 cell part; GO:0048046 apoplast; GO:0071944 cell periphery;										A0A287EUD7	A0A287K2I6	0.378266
Cluster1	A0A287JMQ3	Amidohydro-rel domain-containing protein OS=Hordeum vulgare subsp. vulgare OX=112509 PE=4 SV=1	---	0.733	0.744	0.697	0.74	0.743	0.595	1.365	1.28	1.356	1.236	1.191	1.32	1.84	2.3904e-05	0.956	0.54632	1.803	0.00170015	0.937	0.143182	chloroplast	GO:0000255 allantoin metabolic process; GO:0000256 allantoin catabolic process; GO:0006139 nucleobase-containing compound metabolic process; GO:0006144 purine nucleobase metabolic process; GO:0006145 purine nucleobase catabolic process; GO:0006725 cellular aromatic compound metabolic process; GO:0006807 nitrogen compound metabolic process; GO:0006950 response to stress; GO:0006995 cellular respon…	GO:0005622 intracellular; GO:0005623 cell; GO:0005737 cytoplasm; GO:0005783 endoplasmic reticulum; GO:0012505 endomembrane system; GO:0043226 organelle; GO:0043227 membrane-bounded organelle; GO:0043229 intracellular organelle; GO:0043231 intracellular membrane-bounded organelle; GO:0044424 intracellular part; GO:0044444 cytoplasmic part; GO:0044464 cell part;	GO:0003824 catalytic activity; GO:0004038 allantoinase activity; GO:0016787 hydrolase activity; GO:0016810 hydrolase activity, acting on carbon-nitrogen (but not peptide) bonds; GO:0016812 hydrolase activity, acting on carbon-nitrogen (but not peptide) bonds, in cyclic amides;	K07456	mutS2; DNA mismatch repair protein MutS2	osa03430 Mismatch repair - Oryza sativa japonica (Japanese rice) (RefSeq);	PF01979	Amidohydrolase family	F	KOG2584	Dihydroorotase and related enzymes	A0A287KGB3	A0A287JMQ3	0.574038
Cluster1	A0A287JHV1	4-hydroxy-tetrahydrodipicolinate synthase OS=Hordeum vulgare subsp. vulgare OX=112509 PE=3 SV=1	---	0.71	0.777	0.616	0.657	0.527	0.714	1.26	1.257	1.386	1.186	1.478	1.431	1.856	0.00114322	0.903	0.4012	2.158	0.0024444	1.049	0.58894	cytoplasm		GO:0005622 intracellular; GO:0005623 cell; GO:0005737 cytoplasm; GO:0009507 chloroplast; GO:0009536 plastid; GO:0043226 organelle; GO:0043227 membrane-bounded organelle; GO:0043229 intracellular organelle; GO:0043231 intracellular membrane-bounded organelle; GO:0044424 intracellular part; GO:0044444 cytoplasmic part; GO:0044464 cell part;	GO:0003824 catalytic activity; GO:0008840 4-hydroxy-tetrahydrodipicolinate synthase; GO:0016829 lyase activity; GO:0016835 carbon-oxygen lyase activity; GO:0016836 hydro-lyase activity;	K01714	dapA; 4-hydroxy-tetrahydrodipicolinate synthase [EC:4.3.3.7]	osa00261 Monobactam biosynthesis - Oryza sativa japonica (Japanese rice) (RefSeq); osa00300 Lysine biosynthesis - Oryza sativa japonica (Japanese rice) (RefSeq); osa01100 Metabolic pathways - Oryza sativa japonica (Japanese rice) (RefSeq); osa01110 Biosynthesis of secondary metabolites - Oryza sativa japonica (Japanese rice) (RefSeq); osa01230 Biosynthesis of amino acids - Oryza sativa japonica (…	PF00701	Dihydrodipicolinate synthetase family				A0A287K274	A0A287JHV1	0.517001
Cluster1	A0A287IHS1	PEROXIDASE_4 domain-containing protein OS=Hordeum vulgare subsp. vulgare OX=112509 PE=3 SV=1	---	0.532	0.519	0.541	0.652	0.658	0.669	1.378	1.362	1.438	1.48	1.308	1.463	2.624	6.0245e-7	1.243	0.000103061	2.148	4.2485e-05	1.017	0.72596	mitochondria	GO:0000302 response to reactive oxygen species; GO:0006950 response to stress; GO:0006979 response to oxidative stress; GO:0007154 cell communication; GO:0007165 signal transduction; GO:0008152 metabolic process; GO:0009056 catabolic process; GO:0009266 response to temperature stimulus; GO:0009409 response to cold; GO:0009628 response to abiotic stimulus; GO:0009631 cold acclimation; GO:0009636 r…	GO:0005622 intracellular; GO:0005623 cell; GO:0005737 cytoplasm; GO:0005739 mitochondrion; GO:0009507 chloroplast; GO:0009532 plastid stroma; GO:0009534 chloroplast thylakoid; GO:0009535 chloroplast thylakoid membrane; GO:0009536 plastid; GO:0009570 chloroplast stroma; GO:0009579 thylakoid; GO:0016020 membrane; GO:0031976 plastid thylakoid; GO:0031984 organelle subcompartment; GO:0034357 photosyn…	GO:0003824 catalytic activity; GO:0004130 cytochrome-c peroxidase activity; GO:0004601 peroxidase activity; GO:0016209 antioxidant activity; GO:0016491 oxidoreductase activity; GO:0016684 oxidoreductase activity, acting on peroxide as acceptor;	K00434	E1.11.1.11; L-ascorbate peroxidase [EC:1.11.1.11]	osa00053 Ascorbate and aldarate metabolism - Oryza sativa japonica (Japanese rice) (RefSeq); osa00480 Glutathione metabolism - Oryza sativa japonica (Japanese rice) (RefSeq); osa01100 Metabolic pathways - Oryza sativa japonica (Japanese rice) (RefSeq);	PF00141	Peroxidase				A0A287QXL1	A0A287IHS1	0.467888
Cluster1	A0A287IF33	H0321H01.13 protein(predicted) OS=Hordeum vulgare subsp. vulgare OX=112509 PE=4 SV=1	---	0.677	0.662	0.735	0.531	0.731	0.613	1.571	1.199	1.459	1.079	1.257	1.486	2.039	0.00122419	0.904	0.32954	2.038	0.005516	0.904	0.4468	chloroplast							PF12899	Alkaline and neutral invertase				A0A287XBG1	A0A287IF33	0.478571
Cluster1	A0A287HPR5	C2 domain containing protein(predicted) OS=Hordeum vulgare subsp. vulgare OX=112509 PE=4 SV=1	---	0.864	0.81	0.836	0.754	0.738	0.715	1.219	1.244	1.217	1.156	1.225	1.221	1.466	4.1594e-05	0.879	0.006035	1.632	3.7951e-05	0.979	0.34024	nucleus												A0A287PGT0	A0A287HPR5	0.5962
Cluster1	A0A287HJI7	Phospho-2-dehydro-3-deoxyheptonate aldolase OS=Hordeum vulgare subsp. vulgare OX=112509 PE=3 SV=1	---	0.798	0.746	0.748	0.599	0.636	0.628	1.25	1.213	1.25	1.413	1.395	1.325	1.62	3.8618e-05	0.813	0.00193536	2.218	3.8167e-06	1.113	0.0083614	cytoplasm		GO:0005622 intracellular; GO:0005623 cell; GO:0005737 cytoplasm; GO:0009507 chloroplast; GO:0009534 chloroplast thylakoid; GO:0009536 plastid; GO:0009579 thylakoid; GO:0031976 plastid thylakoid; GO:0031984 organelle subcompartment; GO:0043226 organelle; GO:0043227 membrane-bounded organelle; GO:0043229 intracellular organelle; GO:0043231 intracellular membrane-bounded organelle; GO:0044422 organe…		K01626	E2.5.1.54, aroF, aroG, aroH; 3-deoxy-7-phosphoheptulonate synthase [EC:2.5.1.54]	osa00400 Phenylalanine, tyrosine and tryptophan biosynthesis - Oryza sativa japonica (Japanese rice) (RefSeq); osa01100 Metabolic pathways - Oryza sativa japonica (Japanese rice) (RefSeq); osa01110 Biosynthesis of secondary metabolites - Oryza sativa japonica (Japanese rice) (RefSeq); osa01230 Biosynthesis of amino acids - Oryza sativa japonica (Japanese rice) (RefSeq);	PF01474	Class-II DAHP synthetase family				A0A287R221	A0A287HJI7	0.483114
Cluster1	A0A287HID7	OBG-type G domain-containing protein OS=Hordeum vulgare subsp. vulgare OX=112509 PE=4 SV=1	---	0.739	0.777	0.796	0.616	0.702	0.775	1.263	1.331	1.471	1.243	1.208	1.081	1.758	0.00034453	0.905	0.2136	1.688	0.0026406	0.869	0.085516	cytoplasm									S	KOG1487	GTP-binding protein DRG1 (ODN superfamily)	A0A287G0Y2	A0A287HID7	0.476958
Cluster1	A0A287H1S6	Glucose-6-phosphate 1-dehydrogenase OS=Hordeum vulgare subsp. vulgare OX=112509 PE=3 SV=1	---	0.308	0.283	0.287	0.271	0.306	0.314	1.443	1.587	1.569	1.818	1.852	1.962	5.238	9.9935e-7	1.015	0.81144	6.321	1.7245e-06	1.225	0.0057835	chloroplast	GO:0005975 carbohydrate metabolic process; GO:0005996 monosaccharide metabolic process; GO:0006006 glucose metabolic process; GO:0006081 cellular aldehyde metabolic process; GO:0006098 pentose-phosphate shunt; GO:0006139 nucleobase-containing compound metabolic process; GO:0006725 cellular aromatic compound metabolic process; GO:0006732 coenzyme metabolic process; GO:0006733 oxidoreduction coenzy…	GO:0005622 intracellular; GO:0005623 cell; GO:0005737 cytoplasm; GO:0009507 chloroplast; GO:0009532 plastid stroma; GO:0009536 plastid; GO:0009570 chloroplast stroma; GO:0043226 organelle; GO:0043227 membrane-bounded organelle; GO:0043229 intracellular organelle; GO:0043231 intracellular membrane-bounded organelle; GO:0044422 organelle part; GO:0044424 intracellular part; GO:0044434 chloroplast p…	GO:0003824 catalytic activity; GO:0004345 glucose-6-phosphate dehydrogenase activity; GO:0016491 oxidoreductase activity; GO:0016614 oxidoreductase activity, acting on CH-OH group of donors; GO:0016616 oxidoreductase activity, acting on the CH-OH group of donors, NAD or NADP as acceptor;	K00036	G6PD, zwf; glucose-6-phosphate 1-dehydrogenase [EC:1.1.1.49 1.1.1.363]	osa00030 Pentose phosphate pathway - Oryza sativa japonica (Japanese rice) (RefSeq); osa00480 Glutathione metabolism - Oryza sativa japonica (Japanese rice) (RefSeq); osa01100 Metabolic pathways - Oryza sativa japonica (Japanese rice) (RefSeq); osa01110 Biosynthesis of secondary metabolites - Oryza sativa japonica (Japanese rice) (RefSeq); osa01200 Carbon metabolism - Oryza sativa japonica (Japan…	PF00479; PF02781	Glucose-6-phosphate dehydrogenase, NAD binding domain; Glucose-6-phosphate dehydrogenase, C-terminal domain	G	KOG0563	Glucose-6-phosphate 1-dehydrogenase	A0A287K7S7	A0A287H1S6	0.660731
Cluster1	A0A287GP94	Ketol-acid reductoisomerase(predicted) OS=Hordeum vulgare subsp. vulgare OX=112509 PE=3 SV=1	---	0.831	0.835	0.849	0.805	0.833	0.797	1.08	1.069	1.089	1.231	1.273	1.309	1.287	3.6701e-06	0.968	0.094385	1.566	3.7852e-05	1.178	0.00092081	mitochondria				K00053	ilvC; ketol-acid reductoisomerase [EC:1.1.1.86]	osa00290 Valine, leucine and isoleucine biosynthesis - Oryza sativa japonica (Japanese rice) (RefSeq); osa00770 Pantothenate and CoA biosynthesis - Oryza sativa japonica (Japanese rice) (RefSeq); osa01100 Metabolic pathways - Oryza sativa japonica (Japanese rice) (RefSeq); osa01110 Biosynthesis of secondary metabolites - Oryza sativa japonica (Japanese rice) (RefSeq); osa01210 2-Oxocarboxylic aci…						F2CUU6	A0A287GP94	0.444144
Cluster1	A0A287GGY5	Tubulin alpha chain OS=Hordeum vulgare subsp. vulgare OX=112509 PE=3 SV=1	---	0.772	0.736	0.787	0.566	0.595	0.603	1.384	1.474	1.513	1.189	1.179	1.201	1.905	4.0601e-05	0.769	0.00068339	2.023	1.9316e-06	0.817	0.00170089	chloroplast		GO:0005622 intracellular; GO:0005623 cell; GO:0005856 cytoskeleton; GO:0043226 organelle; GO:0043228 non-membrane-bounded organelle; GO:0043229 intracellular organelle; GO:0043232 intracellular non-membrane-bounded organelle; GO:0044424 intracellular part; GO:0044464 cell part;		K07374	TUBA; tubulin alpha	osa04145 Phagosome - Oryza sativa japonica (Japanese rice) (RefSeq);	PF00091; PF03953	Tubulin/FtsZ family, GTPase domain; Tubulin C-terminal domain	Z	KOG1376	Alpha tubulin	M0YNU2	A0A287GGY5	0.480316
Cluster1	A0A287GGJ8	Starch synthase, chloroplastic/amyloplastic OS=Hordeum vulgare subsp. vulgare OX=112509 PE=3 SV=1	---	0.652	0.511	0.51	0.375	0.513	0.559	1.718	1.692	1.815	1.192	1.305	1.158	3.123	0.000164958	0.865	0.35578	2.526	0.00175865	0.7	0.00102058	chloroplast	GO:0000271 polysaccharide biosynthetic process; GO:0005975 carbohydrate metabolic process; GO:0005976 polysaccharide metabolic process; GO:0005982 starch metabolic process; GO:0006073 cellular glucan metabolic process; GO:0008152 metabolic process; GO:0009058 biosynthetic process; GO:0009059 macromolecule biosynthetic process; GO:0009250 glucan biosynthetic process; GO:0009987 cellular process; G…	GO:0005622 intracellular; GO:0005623 cell; GO:0005737 cytoplasm; GO:0009507 chloroplast; GO:0009536 plastid; GO:0043226 organelle; GO:0043227 membrane-bounded organelle; GO:0043229 intracellular organelle; GO:0043231 intracellular membrane-bounded organelle; GO:0044424 intracellular part; GO:0044444 cytoplasmic part; GO:0044464 cell part;	GO:0003824 catalytic activity; GO:0009011 starch synthase activity; GO:0016740 transferase activity; GO:0016757 transferase activity, transferring glycosyl groups; GO:0016758 transferase activity, transferring hexosyl groups; GO:0046527 glucosyltransferase activity;	K00703	glgA; starch synthase [EC:2.4.1.21]	osa00500 Starch and sucrose metabolism - Oryza sativa japonica (Japanese rice) (RefSeq); osa01100 Metabolic pathways - Oryza sativa japonica (Japanese rice) (RefSeq); osa01110 Biosynthesis of secondary metabolites - Oryza sativa japonica (Japanese rice) (RefSeq);	PF08323	Starch synthase catalytic domain				A0A287TVN4	A0A287GGJ8	0.462017
Cluster1	A0A287GFX8	6-phosphogluconate dehydrogenase, decarboxylating OS=Hordeum vulgare subsp. vulgare OX=112509 PE=3 SV=1	---	0.516	0.513	0.47	0.547	0.578	0.558	1.493	1.462	1.526	1.43	1.468	1.438	2.989	2.3461e-06	1.123	0.027255	2.576	3.8981e-7	0.968	0.089721	chloroplast	GO:0001101 response to acid chemical; GO:0006081 cellular aldehyde metabolic process; GO:0006098 pentose-phosphate shunt; GO:0006139 nucleobase-containing compound metabolic process; GO:0006725 cellular aromatic compound metabolic process; GO:0006732 coenzyme metabolic process; GO:0006733 oxidoreduction coenzyme metabolic process; GO:0006739 NADP metabolic process; GO:0006753 nucleoside phosphate…	GO:0005622 intracellular; GO:0005623 cell; GO:0005737 cytoplasm; GO:0005739 mitochondrion; GO:0005829 cytosol; GO:0005911 cell-cell junction; GO:0009506 plasmodesma; GO:0009507 chloroplast; GO:0009532 plastid stroma; GO:0009536 plastid; GO:0009570 chloroplast stroma; GO:0016020 membrane; GO:0030054 cell junction; GO:0043226 organelle; GO:0043227 membrane-bounded organelle; GO:0043229 intracellula…	GO:0003824 catalytic activity; GO:0008114 phosphogluconate 2-dehydrogenase activity; GO:0016491 oxidoreductase activity; GO:0016614 oxidoreductase activity, acting on CH-OH group of donors; GO:0016616 oxidoreductase activity, acting on the CH-OH group of donors, NAD or NADP as acceptor;	K00033	PGD, gnd, gntZ; 6-phosphogluconate dehydrogenase [EC:1.1.1.44 1.1.1.343]	osa00030 Pentose phosphate pathway - Oryza sativa japonica (Japanese rice) (RefSeq); osa00480 Glutathione metabolism - Oryza sativa japonica (Japanese rice) (RefSeq); osa01100 Metabolic pathways - Oryza sativa japonica (Japanese rice) (RefSeq); osa01110 Biosynthesis of secondary metabolites - Oryza sativa japonica (Japanese rice) (RefSeq); osa01200 Carbon metabolism - Oryza sativa japonica (Japan…	PF03446; PF00393	NAD binding domain of 6-phosphogluconate dehydrogenase; 6-phosphogluconate dehydrogenase, C-terminal domain	G	KOG2653	6-phosphogluconate dehydrogenase	M0WSH8	A0A287GFX8	0.589918
Cluster1	A0A287FYT4	Cold shock protein-1(predicted) OS=Hordeum vulgare subsp. vulgare OX=112509 PE=4 SV=1	---	0.654	0.626	0.621	0.694	0.672	0.671	1.392	1.356	1.322	1.299	1.323	1.371	2.141	2.0526e-06	1.072	0.023738	1.96	2.0106e-06	0.981	0.42862	nucleus	GO:0000003 reproduction; GO:0001101 response to acid chemical; GO:0003006 developmental process involved in reproduction; GO:0006950 response to stress; GO:0006996 organelle organization; GO:0007275 multicellular organism development; GO:0009266 response to temperature stimulus; GO:0009269 response to desiccation; GO:0009409 response to cold; GO:0009414 response to water deprivation; GO:0009415 r…	GO:0005622 intracellular; GO:0005623 cell; GO:0005634 nucleus; GO:0005730 nucleolus; GO:0005737 cytoplasm; GO:0005829 cytosol; GO:0005886 plasma membrane; GO:0016020 membrane; GO:0031974 membrane-enclosed lumen; GO:0031981 nuclear lumen; GO:0043226 organelle; GO:0043227 membrane-bounded organelle; GO:0043228 non-membrane-bounded organelle; GO:0043229 intracellular organelle; GO:0043231 intracellu…	GO:0003676 nucleic acid binding; GO:0003677 DNA binding; GO:0003690 double-stranded DNA binding; GO:0003697 single-stranded DNA binding; GO:0003723 RNA binding; GO:0003729 mRNA binding; GO:0005488 binding; GO:0097159 organic cyclic compound binding; GO:1901363 heterocyclic compound binding;				PF00313; PF00098	'Cold-shock' DNA-binding domain; Zinc knuckle	J	KOG3070	Predicted RNA-binding protein containing PIN domain and invovled in translation or RNA processing	F2EF48	A0A287FYT4	0.619973
Cluster1	A0A287FF64	Cytochrome P450 84A1(predicted) OS=Hordeum vulgare subsp. vulgare OX=112509 PE=3 SV=1	---	0.581	0.643	0.724	0.619	0.559	0.54	1.428	1.641	1.243	1.384	1.351	1.288	2.214	0.00149996	0.882	0.178484	2.342	5.5218e-05	0.933	0.48716	cytoplasm	GO:0006725 cellular aromatic compound metabolic process; GO:0008152 metabolic process; GO:0009058 biosynthetic process; GO:0009314 response to radiation; GO:0009411 response to UV; GO:0009416 response to light stimulus; GO:0009628 response to abiotic stimulus; GO:0009698 phenylpropanoid metabolic process; GO:0009699 phenylpropanoid biosynthetic process; GO:0009808 lignin metabolic process; GO:000…	GO:0005622 intracellular; GO:0005623 cell; GO:0005737 cytoplasm; GO:0005783 endoplasmic reticulum; GO:0012505 endomembrane system; GO:0016020 membrane; GO:0043226 organelle; GO:0043227 membrane-bounded organelle; GO:0043229 intracellular organelle; GO:0043231 intracellular membrane-bounded organelle; GO:0044424 intracellular part; GO:0044444 cytoplasmic part; GO:0044464 cell part;	GO:0003824 catalytic activity; GO:0004497 monooxygenase activity; GO:0016491 oxidoreductase activity; GO:0016705 oxidoreductase activity, acting on paired donors, with incorporation or reduction of molecular oxygen; GO:0016709 oxidoreductase activity, acting on paired donors, with incorporation or reduction of molecular oxygen, NAD(P)H as one donor, and incorporation of one atom of oxygen;	K09755	CYP84A, F5H; ferulate-5-hydroxylase [EC:1.14.-.-]	osa00940 Phenylpropanoid biosynthesis - Oryza sativa japonica (Japanese rice) (RefSeq); osa01100 Metabolic pathways - Oryza sativa japonica (Japanese rice) (RefSeq); osa01110 Biosynthesis of secondary metabolites - Oryza sativa japonica (Japanese rice) (RefSeq);	PF00067	Cytochrome P450	Q	KOG0156	Cytochrome P450 CYP2 subfamily	A0A287X199	A0A287FF64	0.579048
Cluster1	A0A287FDJ7	Glutamyl-tRNA reductase OS=Hordeum vulgare subsp. vulgare OX=112509 PE=3 SV=1	---	0.387	0.429	0.463	0.162	0.291	0.323	1.987	1.722	1.88	1.091	1.684	1.581	4.37	2.228e-05	0.607	0.071016	5.613	0.0023202	0.779	0.134725	chloroplast	GO:0006725 cellular aromatic compound metabolic process; GO:0006778 porphyrin-containing compound metabolic process; GO:0006779 porphyrin-containing compound biosynthetic process; GO:0006783 heme biosynthetic process; GO:0006807 nitrogen compound metabolic process; GO:0006950 response to stress; GO:0006979 response to oxidative stress; GO:0008152 metabolic process; GO:0009058 biosynthetic process…	GO:0005622 intracellular; GO:0005623 cell; GO:0005737 cytoplasm; GO:0009507 chloroplast; GO:0009536 plastid; GO:0043226 organelle; GO:0043227 membrane-bounded organelle; GO:0043229 intracellular organelle; GO:0043231 intracellular membrane-bounded organelle; GO:0044424 intracellular part; GO:0044444 cytoplasmic part; GO:0044464 cell part;	GO:0003824 catalytic activity; GO:0008883 glutamyl-tRNA reductase activity; GO:0016491 oxidoreductase activity; GO:0016620 oxidoreductase activity, acting on the aldehyde or oxo group of donors, NAD or NADP as acceptor; GO:0016903 oxidoreductase activity, acting on the aldehyde or oxo group of donors;	K02492	hemA; glutamyl-tRNA reductase [EC:1.2.1.70]	osa00860 Porphyrin and chlorophyll metabolism - Oryza sativa japonica (Japanese rice) (RefSeq); osa01100 Metabolic pathways - Oryza sativa japonica (Japanese rice) (RefSeq); osa01110 Biosynthesis of secondary metabolites - Oryza sativa japonica (Japanese rice) (RefSeq);	PF05201; PF00745	Glutamyl-tRNAGlu reductase, N-terminal domain; Glutamyl-tRNAGlu reductase, dimerisation domain				M0XRY1	A0A287FDJ7	0.481774
Cluster1	A0A287F7D4	U-box domain-containing protein 72(predicted) OS=Hordeum vulgare subsp. vulgare OX=112509 PE=4 SV=1	---	0.662	0.698	0.768	0.764	0.687	0.788	1.253	1.237	1.331	1.25	1.28	1.282	1.796	0.00027912	1.052	0.44368	1.703	0.0002239	0.998	0.94038	cytoplasm	GO:0000209 protein polyubiquitination; GO:0000349 generation of catalytic spliceosome for first transesterification step; GO:0000375 RNA splicing, via transesterification reactions; GO:0000377 RNA splicing, via transesterification reactions with bulged adenosine as nucleophile; GO:0000393 spliceosomal conformational changes to generate catalytic conformation; GO:0000398 mRNA splicing, via spliceo…	GO:0000151 ubiquitin ligase complex; GO:0000974 Prp19 complex; GO:0005618 cell wall; GO:0005622 intracellular; GO:0005623 cell; GO:0005634 nucleus; GO:0005681 spliceosomal complex; GO:0005684 U2-type spliceosomal complex; GO:0005730 nucleolus; GO:0005737 cytoplasm; GO:0009507 chloroplast; GO:0009536 plastid; GO:0030312 external encapsulating structure; GO:0031461 cullin-RING ubiquitin ligase comp…	GO:0003824 catalytic activity; GO:0004842 ubiquitin-protein transferase activity; GO:0016740 transferase activity; GO:0019787 ubiquitin-like protein transferase activity; GO:0061630 ubiquitin protein ligase activity; GO:0061659 ubiquitin-like protein ligase activity;	K10599	PRPF19, PRP19; pre-mRNA-processing factor 19 [EC:2.3.2.27]	osa03040 Spliceosome - Oryza sativa japonica (Japanese rice) (RefSeq); osa04120 Ubiquitin mediated proteolysis - Oryza sativa japonica (Japanese rice) (RefSeq);	PF08606	Prp19/Pso4-like	J	KOG0289	mRNA splicing factor	M0W5F2	A0A287F7D4	0.549483
Cluster1	A0A287EKK9	YTH domain-containing protein OS=Hordeum vulgare subsp. vulgare OX=112509 PE=4 SV=1	---	0.609	0.685	0.764	0.99	0.793	0.825	1.066	1.138	1.059	1.315	1.395	1.361	1.586	0.0025831	1.267	0.066924	1.561	0.0030838	1.248	0.0015035	nucleus							PF04146	YT521-B-like domain	S	KOG1901	Uncharacterized high-glucose-regulated protein	A0A287NUN2	A0A287EKK9	0.369723
Cluster1	A0A287EGT4	Actin(predicted) OS=Hordeum vulgare subsp. vulgare OX=112509 PE=3 SV=1	---	0.739	0.821	0.785	0.798	0.717	0.728	1.395	1.378	1.159	1.07	1.202	1.207	1.677	0.00156143	0.957	0.37934	1.551	0.00106101	0.885	0.168283	cytoskeleton		GO:0005622 intracellular; GO:0005623 cell; GO:0005856 cytoskeleton; GO:0043226 organelle; GO:0043228 non-membrane-bounded organelle; GO:0043229 intracellular organelle; GO:0043232 intracellular non-membrane-bounded organelle; GO:0044424 intracellular part; GO:0044464 cell part;		K10355	ACTF; actin, other eukaryote				Z	KOG0676	Actin and related proteins	M0UZ78	A0A287EGT4	0.483183
Cluster1	A0A287E549	H1005F08.7 protein(predicted) OS=Hordeum vulgare subsp. vulgare OX=112509 PE=3 SV=1	---	0.574	0.947	0.665	0.953	0.64	0.82	0.98	1.257	1.118	1.3	1.432	1.314	1.535	0.054017	1.104	0.59668	1.677	0.0116206	1.206	0.070419	chloroplast	GO:0006996 organelle organization; GO:0009314 response to radiation; GO:0009416 response to light stimulus; GO:0009628 response to abiotic stimulus; GO:0009637 response to blue light; GO:0009657 plastid organization; GO:0009658 chloroplast organization; GO:0009902 chloroplast relocation; GO:0009987 cellular process; GO:0010020 chloroplast fission; GO:0016043 cellular component organization; GO:00…	GO:0005622 intracellular; GO:0005623 cell; GO:0005737 cytoplasm; GO:0009507 chloroplast; GO:0009532 plastid stroma; GO:0009536 plastid; GO:0009570 chloroplast stroma; GO:0043226 organelle; GO:0043227 membrane-bounded organelle; GO:0043229 intracellular organelle; GO:0043231 intracellular membrane-bounded organelle; GO:0044422 organelle part; GO:0044424 intracellular part; GO:0044434 chloroplast p…	GO:0000166 nucleotide binding; GO:0001882 nucleoside binding; GO:0001883 purine nucleoside binding; GO:0003824 catalytic activity; GO:0003924 GTPase activity; GO:0005488 binding; GO:0005515 protein binding; GO:0005525 GTP binding; GO:0016462 pyrophosphatase activity; GO:0016787 hydrolase activity; GO:0016817 hydrolase activity, acting on acid anhydrides; GO:0016818 hydrolase activity, acting on a…	K03531	ftsZ; cell division protein FtsZ		PF00091; PF12327	Tubulin/FtsZ family, GTPase domain; FtsZ family, C-terminal domain				A0A287WP26	A0A287E549	0.354443
Cluster1	A0A287DTW2	Lipase_3 domain-containing protein OS=Hordeum vulgare subsp. vulgare OX=112509 PE=4 SV=1	---	0.52	0.488	0.448	0.587	0.507	0.527	1.53	1.541	1.574	1.352	1.483	1.444	3.19	1.61169e-05	1.113	0.156238	2.64	4.365e-05	0.921	0.045196	cytoplasm	GO:0006629 lipid metabolic process; GO:0006638 neutral lipid metabolic process; GO:0006639 acylglycerol metabolic process; GO:0008152 metabolic process; GO:0009056 catabolic process; GO:0009987 cellular process; GO:0010029 regulation of seed germination; GO:0010187 negative regulation of seed germination; GO:0010876 lipid localization; GO:0016042 lipid catabolic process; GO:0019915 lipid storage;…	GO:0005622 intracellular; GO:0005623 cell; GO:0005737 cytoplasm; GO:0044424 intracellular part; GO:0044464 cell part;	GO:0003824 catalytic activity; GO:0004620 phospholipase activity; GO:0008970 phosphatidylcholine 1-acylhydrolase activity; GO:0016298 lipase activity; GO:0016787 hydrolase activity; GO:0016788 hydrolase activity, acting on ester bonds; GO:0047372 acylglycerol lipase activity; GO:0052689 carboxylic ester hydrolase activity;						I	KOG4569	Predicted lipase	M0WU58	A0A287DTW2	0.571216
Cluster2	S4Z1V8	Photosystem II protein D1 OS=Hordeum vulgare subsp. vulgare OX=112509 GN=psbA PE=3 SV=1	psbA	1.182	1.174	1.207	1.169	1.232	1.156	0.859	0.858	0.872	0.737	0.757	0.796	0.727	2.6853e-06	0.998	0.92968	0.644	0.000121882	0.885	0.0060164	plasma membrane		GO:0005622 intracellular; GO:0005623 cell; GO:0005737 cytoplasm; GO:0009507 chloroplast; GO:0009532 plastid stroma; GO:0009534 chloroplast thylakoid; GO:0009535 chloroplast thylakoid membrane; GO:0009536 plastid; GO:0009570 chloroplast stroma; GO:0009579 thylakoid; GO:0010287 plastoglobule; GO:0016020 membrane; GO:0031976 plastid thylakoid; GO:0031984 organelle subcompartment; GO:0034357 photosyn…	GO:0005488 binding; GO:0016168 chlorophyll binding; GO:0043167 ion binding; GO:0043168 anion binding; GO:0046906 tetrapyrrole binding; GO:0048037 cofactor binding; GO:0097159 organic cyclic compound binding; GO:1901363 heterocyclic compound binding;	K02703	psbA; photosystem II P680 reaction center D1 protein [EC:1.10.3.9]	osa00195 Photosynthesis - Oryza sativa japonica (Japanese rice) (RefSeq); osa01100 Metabolic pathways - Oryza sativa japonica (Japanese rice) (RefSeq);						M0YIV9	S4Z1V8	0.389984
Cluster2	M0Z4N7	Glutamine amidotransferase type-2 domain-containing protein OS=Hordeum vulgare subsp. vulgare OX=112509 PE=3 SV=1	---	1.051	0.967	0.99	1.283	1.245	1.266	0.858	0.895	0.982	0.818	0.795	0.85	0.909	0.110003	1.261	0.00089899	0.649	3.7206e-05	0.901	0.079779	nucleus				K00764	purF, PPAT; amidophosphoribosyltransferase [EC:2.4.2.14]	osa00230 Purine metabolism - Oryza sativa japonica (Japanese rice) (RefSeq); osa00250 Alanine, aspartate and glutamate metabolism - Oryza sativa japonica (Japanese rice) (RefSeq); osa01100 Metabolic pathways - Oryza sativa japonica (Japanese rice) (RefSeq); osa01110 Biosynthesis of secondary metabolites - Oryza sativa japonica (Japanese rice) (RefSeq);	PF13537	Glutamine amidotransferase domain	F	KOG0572	Glutamine phosphoribosylpyrophosphate amidotransferase	A0A287XXN6	M0Z4N7	0.419412
Cluster2	M0YMF7	Expressed protein(predicted) OS=Hordeum vulgare subsp. vulgare OX=112509 PE=4 SV=1	---	0.911	1.02	1.258	1.301	1.337	1.135	0.787	0.943	0.884	0.846	0.747	0.832	0.82	0.150185	1.183	0.178739	0.643	0.0023184	0.928	0.3245	nucleus												M0Z6C2	M0YMF7	0.343048
Cluster2	M0Y3R7	Carboxypeptidase OS=Hordeum vulgare subsp. vulgare OX=112509 PE=3 SV=1	---	0.838	0.805	0.888	1.238	1.263	1.338	1.086	1.021	1.057	0.823	0.826	0.817	1.25	0.0026442	1.517	0.00034292	0.642	0.002818	0.779	0.000161854	peroxisome				K16297	SCPL-II; serine carboxypeptidase-like clade II [EC:3.4.16.-]		PF00450	Serine carboxypeptidase	O	KOG1282	Serine carboxypeptidases (lysosomal cathepsin A)	A0A287MBI6	M0Y3R7	0.322838
Cluster2	M0XZZ4	Glutamate decarboxylase OS=Hordeum vulgare subsp. vulgare OX=112509 PE=3 SV=1	---	1.398	1.417	1.343	1.135	1.128	1.181	0.929	0.972	0.901	0.547	0.564	0.485	0.674	0.000136294	0.828	0.000956	0.463	8.4835e-05	0.57	0.00038031	cytoskeleton	GO:0010035 response to inorganic substance; GO:0010038 response to metal ion; GO:0042221 response to chemical; GO:0046686 response to cadmium ion; GO:0050896 response to stimulus;	GO:0005622 intracellular; GO:0005623 cell; GO:0005634 nucleus; GO:0005737 cytoplasm; GO:0005829 cytosol; GO:0043226 organelle; GO:0043227 membrane-bounded organelle; GO:0043229 intracellular organelle; GO:0043231 intracellular membrane-bounded organelle; GO:0044424 intracellular part; GO:0044444 cytoplasmic part; GO:0044464 cell part;	GO:0003824 catalytic activity; GO:0004351 glutamate decarboxylase activity; GO:0005488 binding; GO:0005515 protein binding; GO:0005516 calmodulin binding; GO:0016829 lyase activity; GO:0016830 carbon-carbon lyase activity; GO:0016831 carboxy-lyase activity;	K01580	E4.1.1.15, gadB, gadA, GAD; glutamate decarboxylase [EC:4.1.1.15]	osa00250 Alanine, aspartate and glutamate metabolism - Oryza sativa japonica (Japanese rice) (RefSeq); osa00410 beta-Alanine metabolism - Oryza sativa japonica (Japanese rice) (RefSeq); osa00430 Taurine and hypotaurine metabolism - Oryza sativa japonica (Japanese rice) (RefSeq); osa00650 Butanoate metabolism - Oryza sativa japonica (Japanese rice) (RefSeq); osa01100 Metabolic pathways - Oryza sat…	PF00282	Pyridoxal-dependent decarboxylase conserved domain	E	KOG1383	Glutamate decarboxylase/sphingosine phosphate lyase	A0A287PFT1	M0XZZ4	0.516455
Cluster2	M0XRX1	Fn3_like domain-containing protein OS=Hordeum vulgare subsp. vulgare OX=112509 PE=4 SV=1	---	1.527	1.416	1.411	1.014	0.962	0.962	1.061	1.081	0.977	0.536	0.556	0.497	0.716	0.00116322	0.675	0.00022395	0.541	7.993e-05	0.509	0.000119483	vacuolar membrane							PF00933; PF01915	Glycosyl hydrolase family 3 N terminal domain; Glycosyl hydrolase family 3 C-terminal domain				A0A287NKN4	M0XRX1	0.401353
Cluster2	M0XN17	CCD-B4(predicted) OS=Hordeum vulgare subsp. vulgare OX=112509 PE=3 SV=1	---	1.282	1.266	1.221	1.157	1.231	1.17	0.864	0.877	0.879	0.692	0.664	0.696	0.695	2.0005e-05	0.944	0.074062	0.577	2.1008e-05	0.783	0.000100528	nucleus		GO:0005622 intracellular; GO:0005623 cell; GO:0005737 cytoplasm; GO:0009507 chloroplast; GO:0009532 plastid stroma; GO:0009536 plastid; GO:0009570 chloroplast stroma; GO:0010287 plastoglobule; GO:0043226 organelle; GO:0043227 membrane-bounded organelle; GO:0043229 intracellular organelle; GO:0043231 intracellular membrane-bounded organelle; GO:0044422 organelle part; GO:0044424 intracellular part…		K09840	NCED; 9-cis-epoxycarotenoid dioxygenase [EC:1.13.11.51]	osa00906 Carotenoid biosynthesis - Oryza sativa japonica (Japanese rice) (RefSeq); osa01100 Metabolic pathways - Oryza sativa japonica (Japanese rice) (RefSeq); osa01110 Biosynthesis of secondary metabolites - Oryza sativa japonica (Japanese rice) (RefSeq);			Q	KOG1285	Beta, beta-carotene 15,15'-dioxygenase and related enzymes	A0A287R3U8	M0XN17	0.518726
Cluster2	M0WMB6	39 kDa EF-Hand containing protein, putative, expressed(predicted) OS=Hordeum vulgare subsp. vulgare OX=112509 PE=4 SV=1	---	1.066	1.051	1.113	1.185	1.399	1.16	0.89	0.893	0.936	0.772	0.743	0.791	0.842	0.00190314	1.159	0.079244	0.616	0.00147934	0.848	0.0025173	cytoplasm												A0A287KIE2	M0WMB6	0.551835
Cluster2	M0UYT8	Alpha-galactosidase OS=Hordeum vulgare subsp. vulgare OX=112509 PE=3 SV=1	---	1.217	1.169	1.13	1.699	1.581	1.574	0.728	0.712	0.756	0.487	0.456	0.491	0.625	7.5085e-05	1.381	0.00059909	0.295	1.8211e-06	0.653	0.000124188	extracellular		GO:0005576 extracellular region; GO:0005618 cell wall; GO:0005623 cell; GO:0009505 plant-type cell wall; GO:0030312 external encapsulating structure; GO:0044464 cell part; GO:0048046 apoplast; GO:0071944 cell periphery;		K07407	E3.2.1.22B, galA, rafA; alpha-galactosidase [EC:3.2.1.22]	osa00052 Galactose metabolism - Oryza sativa japonica (Japanese rice) (RefSeq); osa00561 Glycerolipid metabolism - Oryza sativa japonica (Japanese rice) (RefSeq); osa00600 Sphingolipid metabolism - Oryza sativa japonica (Japanese rice) (RefSeq); osa00603 Glycosphingolipid biosynthesis - globo and isoglobo series - Oryza sativa japonica (Japanese rice) (RefSeq); osa01100 Metabolic pathways - Oryza…			G	KOG2366	Alpha-D-galactosidase (melibiase)	A0A287H1L2	M0UYT8	0.670998
Cluster2	J7GP58	Sucrose:fructan 6-fructosyltransferase OS=Hordeum vulgare subsp. vulgare OX=112509 PE=3 SV=1	---	1.764	1.748	1.789	0.652	0.73	0.699	1.155	1.078	1.129	0.423	0.448	0.387	0.634	2.4342e-05	0.393	4.9348e-06	0.605	0.00072187	0.374	3.5575e-05	endoplasmic reticulum	GO:0001101 response to acid chemical; GO:0007275 multicellular organism development; GO:0009605 response to external stimulus; GO:0009607 response to biotic stimulus; GO:0009617 response to bacterium; GO:0009719 response to endogenous stimulus; GO:0009725 response to hormone; GO:0009739 response to gibberellin; GO:0009987 cellular process; GO:0010033 response to organic substance; GO:0022622 root…	GO:0000325 plant-type vacuole; GO:0005618 cell wall; GO:0005622 intracellular; GO:0005623 cell; GO:0005737 cytoplasm; GO:0005773 vacuole; GO:0009505 plant-type cell wall; GO:0030312 external encapsulating structure; GO:0043226 organelle; GO:0043227 membrane-bounded organelle; GO:0043229 intracellular organelle; GO:0043231 intracellular membrane-bounded organelle; GO:0044424 intracellular part; GO…	GO:0003824 catalytic activity; GO:0004553 hydrolase activity, hydrolyzing O-glycosyl compounds; GO:0004564 beta-fructofuranosidase activity; GO:0016787 hydrolase activity; GO:0016798 hydrolase activity, acting on glycosyl bonds;	K21351	SST; sucrose:sucrose fructosyltransferase [EC:2.4.1.99]		PF00251; PF08244	Glycosyl hydrolases family 32 N-terminal domain; Glycosyl hydrolases family 32 C terminal	G	KOG0228	Beta-fructofuranosidase (invertase)	A0A287Q0E8	J7GP58	0.296411
Cluster2	F2DDC9	Predicted protein OS=Hordeum vulgare subsp. vulgare OX=112509 PE=2 SV=1	---	1.104	1.135	1.137	1.29	1.414	1.278	0.869	0.866	0.876	0.724	0.593	0.713	0.773	1.71691e-05	1.18	0.0081649	0.51	0.00070308	0.777	0.057678	extracellular				K01373	CTSF; cathepsin F [EC:3.4.22.41]	osa04626 Plant-pathogen interaction - Oryza sativa japonica (Japanese rice) (RefSeq);	PF08246; PF00112	Cathepsin propeptide inhibitor domain (I29); Papain family cysteine protease	O	KOG1542	Cysteine proteinase Cathepsin F	A0A287XCJ3	F2DDC9	0.635414
Cluster2	F2D6G1	Predicted protein OS=Hordeum vulgare subsp. vulgare OX=112509 PE=2 SV=1	---	1.124	1.058	1.154	1.276	1.229	1.226	0.822	0.848	0.959	0.682	0.776	0.846	0.788	0.0110636	1.118	0.0174642	0.618	0.00161515	0.876	0.163259	chloroplast		GO:0005622 intracellular; GO:0005623 cell; GO:0005737 cytoplasm; GO:0009507 chloroplast; GO:0009526 plastid envelope; GO:0009534 chloroplast thylakoid; GO:0009535 chloroplast thylakoid membrane; GO:0009536 plastid; GO:0009579 thylakoid; GO:0009941 chloroplast envelope; GO:0016020 membrane; GO:0031090 organelle membrane; GO:0031967 organelle envelope; GO:0031969 chloroplast membrane; GO:0031975 en…							C	KOG2614	Kynurenine 3-monooxygenase and related flavoprotein monooxygenases	A0A287F411	F2D6G1	0.459932
Cluster2	F2D5X1	Purple acid phosphatase OS=Hordeum vulgare subsp. vulgare OX=112509 PE=2 SV=1	---	1.122	1.172	1.109	1.344	1.245	1.176	0.929	0.867	0.89	0.728	0.735	0.683	0.789	0.00083749	1.106	0.077004	0.57	0.00023912	0.799	0.00183642	nucleus				K22390			PF00149; PF14008	Calcineurin-like phosphoesterase; Iron/zinc purple acid phosphatase-like protein C	G	KOG1378	Purple acid phosphatase	F2DDP7	F2D5X1	0.641736
Cluster2	F2D479	Predicted protein OS=Hordeum vulgare subsp. vulgare OX=112509 PE=2 SV=1	---	1.042	1.184	1.118	1.145	1.123	1.051	1.122	1.011	1.041	0.692	0.74	0.73	0.949	0.34352	0.993	0.88738	0.651	0.00020204	0.681	0.00049905	chloroplast												A0A287JHV1	F2D479	0.524803
Cluster2	F2CZT3	Predicted protein OS=Hordeum vulgare subsp. vulgare OX=112509 PE=2 SV=1	---	0.995	1.031	1	1.246	1.116	1.185	1.066	1.054	1.096	0.738	0.719	0.752	1.063	0.0192754	1.172	0.0094224	0.623	0.000161289	0.687	2.373e-05	cytoplasm							PF08100; PF00891	Dimerisation domain; O-methyltransferase	S	KOG3178	Hydroxyindole-O-methyltransferase and related SAM-dependent methyltransferases	M0XDX5	F2CZT3	0.530539
Cluster2	F2CQD4	Predicted protein OS=Hordeum vulgare subsp. vulgare OX=112509 PE=2 SV=1	---	1.048	1.01	1.406	1.389	1.302	1.09	1.169	1.077	1.069	0.326	0.272	0.841	0.957	0.77286	1.092	0.50254	0.381	0.037882	0.434	0.110976	nucleus							PF00168	C2 domain				A0A287RR21	F2CQD4	0.433587
Cluster2	F2CPU0	Glycosyltransferase OS=Hordeum vulgare subsp. vulgare OX=112509 PE=2 SV=1	---	0.914	1.054	1.081	1.415	1.059	1.313	0.969	1.037	1.008	0.778	0.669	0.702	0.989	0.87644	1.242	0.104557	0.567	0.004538	0.713	0.0022155	chloroplast									CG	KOG1192	UDP-glucuronosyl and UDP-glucosyl transferase	A0A287LB65	F2CPU0	0.50603
Cluster2	A0A287X9B0	Peroxidase OS=Hordeum vulgare subsp. vulgare OX=112509 PE=3 SV=1	---	1.381	1.343	1.325	1.186	1.267	1.377	0.84	0.704	0.779	0.584	0.605	0.609	0.574	0.00044337	0.946	0.27064	0.469	7.7465e-05	0.774	0.008605	extracellular				K00430	E1.11.1.7; peroxidase [EC:1.11.1.7]	osa00940 Phenylpropanoid biosynthesis - Oryza sativa japonica (Japanese rice) (RefSeq); osa01100 Metabolic pathways - Oryza sativa japonica (Japanese rice) (RefSeq); osa01110 Biosynthesis of secondary metabolites - Oryza sativa japonica (Japanese rice) (RefSeq);	PF00141	Peroxidase				A0A287PJ55	A0A287X9B0	0.390615
Cluster2	A0A287X4U5	Peroxidase OS=Hordeum vulgare subsp. vulgare OX=112509 PE=3 SV=1	---	1.001	0.974	0.978	1.208	1.192	1.217	1.101	1.057	1.138	0.709	0.721	0.704	1.116	0.0088814	1.225	4.0817e-05	0.59	2.9186e-7	0.647	4.1213e-05	chloroplast				K00430	E1.11.1.7; peroxidase [EC:1.11.1.7]	osa00940 Phenylpropanoid biosynthesis - Oryza sativa japonica (Japanese rice) (RefSeq); osa01100 Metabolic pathways - Oryza sativa japonica (Japanese rice) (RefSeq); osa01110 Biosynthesis of secondary metabolites - Oryza sativa japonica (Japanese rice) (RefSeq);	PF00141	Peroxidase				F2DF14	A0A287X4U5	0.497266
Cluster2	A0A287WPW9	Glutaredoxin domain-containing protein OS=Hordeum vulgare subsp. vulgare OX=112509 PE=4 SV=1	---	0.574	0.58	0.606	1.275	1.068	2.54	0.983	0.877	1.056	0.771	0.99	0.682	1.657	0.00088477	2.774	0.070037	0.5	0.092002	0.838	0.20224	chloroplast	GO:0006790 sulfur compound metabolic process; GO:0008152 metabolic process; GO:0009636 response to toxic substance; GO:0009987 cellular process; GO:0016043 cellular component organization; GO:0016226 iron-sulfur cluster assembly; GO:0022607 cellular component assembly; GO:0031163 metallo-sulfur cluster assembly; GO:0042221 response to chemical; GO:0044085 cellular component biogenesis; GO:0044237…	GO:0005622 intracellular; GO:0005623 cell; GO:0005737 cytoplasm; GO:0009507 chloroplast; GO:0009536 plastid; GO:0043226 organelle; GO:0043227 membrane-bounded organelle; GO:0043229 intracellular organelle; GO:0043231 intracellular membrane-bounded organelle; GO:0044424 intracellular part; GO:0044444 cytoplasmic part; GO:0044464 cell part;	GO:0003824 catalytic activity; GO:0004362 glutathione-disulfide reductase activity; GO:0015036 disulfide oxidoreductase activity; GO:0015037 peptide disulfide oxidoreductase activity; GO:0015038 glutathione disulfide oxidoreductase activity; GO:0016209 antioxidant activity; GO:0016491 oxidoreductase activity; GO:0016651 oxidoreductase activity, acting on NAD(P)H; GO:0016667 oxidoreductase activit…	K03676	grxC, GLRX, GLRX2; glutaredoxin 3		PF00462	Glutaredoxin	O	KOG1752	Glutaredoxin and related proteins	A0A287QBH6	A0A287WPW9	0.221432
Cluster2	A0A287W263	Putative phi-1(predicted) OS=Hordeum vulgare subsp. vulgare OX=112509 PE=4 SV=1	---	1.291	1.214	1.247	0.803	0.824	0.957	1.133	1.226	1.091	0.7	0.733	0.78	0.92	0.093623	0.689	0.0028391	0.856	0.072296	0.641	0.00067706	chloroplast													A0A287W263	0.26059
Cluster2	A0A287W1F4	Kinesin motor domain-containing protein OS=Hordeum vulgare subsp. vulgare OX=112509 PE=3 SV=1	---	1.129	1.104	1.11	1.201	1.179	1.241	0.87	0.858	0.921	0.785	0.786	0.816	0.792	0.00050363	1.083	0.0083392	0.659	2.4609e-05	0.901	0.0144617	cytoplasm	GO:0000278 mitotic cell cycle; GO:0000281 mitotic cytokinesis; GO:0000910 cytokinesis; GO:0000911 cytokinesis by cell plate formation; GO:0000913 preprophase band assembly; GO:0006810 transport; GO:0006928 movement of cell or subcellular component; GO:0006996 organelle organization; GO:0007017 microtubule-based process; GO:0007018 microtubule-based movement; GO:0007049 cell cycle; GO:0007097 nucl…	GO:0005622 intracellular; GO:0005623 cell; GO:0005634 nucleus; GO:0005694 chromosome; GO:0005737 cytoplasm; GO:0005819 spindle; GO:0005829 cytosol; GO:0005856 cytoskeleton; GO:0005871 kinesin complex; GO:0005875 microtubule associated complex; GO:0005886 plasma membrane; GO:0009504 cell plate; GO:0009507 chloroplast; GO:0009524 phragmoplast; GO:0009526 plastid envelope; GO:0009536 plastid; GO:000…	GO:0003774 motor activity; GO:0003777 microtubule motor activity; GO:0003824 catalytic activity; GO:0005488 binding; GO:0005515 protein binding; GO:0008017 microtubule binding; GO:0008092 cytoskeletal protein binding; GO:0015631 tubulin binding; GO:0016462 pyrophosphatase activity; GO:0016787 hydrolase activity; GO:0016817 hydrolase activity, acting on acid anhydrides; GO:0016818 hydrolase activi…				PF00225	Kinesin motor domain	Z	KOG0239	Kinesin (KAR3 subfamily)	A0A287Q396	A0A287W1F4	0.457047
Cluster2	A0A287V5B6	Abhydrolase_3 domain-containing protein OS=Hordeum vulgare subsp. vulgare OX=112509 PE=4 SV=1	---	0.935	0.976	1.021	0.957	0.877	0.995	1.238	1.374	1.353	0.746	0.667	0.863	1.352	0.00186151	0.965	0.46418	0.805	0.056483	0.574	0.0023398	cytoplasm							PF07859	alpha/beta hydrolase fold	V	KOG1515	Arylacetamide deacetylase		A0A287V5B6	0.218137
Cluster2	A0A287UB46	PIP aquaporin(predicted) OS=Hordeum vulgare subsp. vulgare OX=112509 PE=3 SV=1	---	0.998	1.086	1.071	1.237	1.294	1.334	0.944	0.946	0.954	0.688	0.69	0.755	0.901	0.059562	1.225	0.0039991	0.552	9.6471e-05	0.75	0.0111037	plasma membrane	GO:0006810 transport; GO:0006811 ion transport; GO:0006833 water transport; GO:0034220 ion transmembrane transport; GO:0042044 fluid transport; GO:0051179 localization; GO:0051234 establishment of localization; GO:0055085 transmembrane transport;	GO:0005623 cell; GO:0005886 plasma membrane; GO:0005887 integral component of plasma membrane; GO:0016020 membrane; GO:0016021 integral component of membrane; GO:0031224 intrinsic component of membrane; GO:0031226 intrinsic component of plasma membrane; GO:0044425 membrane part; GO:0044459 plasma membrane part; GO:0044464 cell part; GO:0071944 cell periphery;	GO:0005215 transporter activity; GO:0005372 water transmembrane transporter activity; GO:0015250 water channel activity; GO:0015267 channel activity; GO:0015318 inorganic solute uptake transmembrane transporter activity; GO:0022803 passive transmembrane transporter activity; GO:0022838 substrate-specific channel activity; GO:0022857 transmembrane transporter activity;	K09872	PIP; aquaporin PIP				G	KOG0223	Aquaporin (major intrinsic protein family)	M0WA98	A0A287UB46	0.662851
Cluster2	A0A287U945	Sister chromatid cohesion protein PDS5 B-B(predicted) OS=Hordeum vulgare subsp. vulgare OX=112509 PE=4 SV=1	---	1.238	1.116	0.856	1.489	1.054	0.915	0.911	1.18	1.065	0.688	0.801	0.688	0.983	0.93908	1.077	0.73966	0.63	0.044275	0.69	0.0153376	nucleus									D	KOG1525	Sister chromatid cohesion complex Cohesin, subunit PDS5	A0A287U928	A0A287U945	0.372029
Cluster2	A0A287TVN4	Lipoxygenase OS=Hordeum vulgare subsp. vulgare OX=112509 PE=3 SV=1	---	0.899	0.911	0.916	1.295	1.366	1.366	0.957	0.965	0.95	0.779	0.798	0.797	1.054	0.00189683	1.477	3.5438e-05	0.59	1.54549e-05	0.827	3.5031e-05	cytoplasm	GO:0001101 response to acid chemical; GO:0006082 organic acid metabolic process; GO:0006629 lipid metabolic process; GO:0006631 fatty acid metabolic process; GO:0006690 icosanoid metabolic process; GO:0008152 metabolic process; GO:0009719 response to endogenous stimulus; GO:0009725 response to hormone; GO:0009751 response to salicylic acid; GO:0009753 response to jasmonic acid; GO:0009987 cellula…	GO:0005622 intracellular; GO:0005623 cell; GO:0005737 cytoplasm; GO:0009507 chloroplast; GO:0009536 plastid; GO:0043226 organelle; GO:0043227 membrane-bounded organelle; GO:0043229 intracellular organelle; GO:0043231 intracellular membrane-bounded organelle; GO:0044424 intracellular part; GO:0044444 cytoplasmic part; GO:0044464 cell part;		K00454	LOX2S; lipoxygenase [EC:1.13.11.12]	osa00591 Linoleic acid metabolism - Oryza sativa japonica (Japanese rice) (RefSeq); osa00592 alpha-Linolenic acid metabolism - Oryza sativa japonica (Japanese rice) (RefSeq); osa01100 Metabolic pathways - Oryza sativa japonica (Japanese rice) (RefSeq); osa01110 Biosynthesis of secondary metabolites - Oryza sativa japonica (Japanese rice) (RefSeq);	PF01477; PF00305	PLAT/LH2 domain; Lipoxygenase				A0A287HGA5	A0A287TVN4	0.402864
Cluster2	A0A287TJ16	L-arabinokinase(predicted) OS=Hordeum vulgare subsp. vulgare OX=112509 PE=4 SV=1	---	0.952	0.799	0.958	1.339	1.391	1.176	1.026	1.083	0.904	0.756	0.801	0.816	1.112	0.25218	1.442	0.0093815	0.608	0.00088088	0.788	0.0153633	mitochondria	GO:0005975 carbohydrate metabolic process; GO:0006793 phosphorus metabolic process; GO:0006796 phosphate-containing compound metabolic process; GO:0008152 metabolic process; GO:0009987 cellular process; GO:0016310 phosphorylation; GO:0044237 cellular metabolic process; GO:0044238 primary metabolic process; GO:0044262 cellular carbohydrate metabolic process; GO:0046835 carbohydrate phosphorylation…	GO:0005622 intracellular; GO:0005623 cell; GO:0005737 cytoplasm; GO:0005829 cytosol; GO:0005911 cell-cell junction; GO:0009506 plasmodesma; GO:0030054 cell junction; GO:0044424 intracellular part; GO:0044444 cytoplasmic part; GO:0044464 cell part; GO:0055044 symplast;	GO:0003824 catalytic activity; GO:0009702 L-arabinokinase activity; GO:0016301 kinase activity; GO:0016740 transferase activity; GO:0016772 transferase activity, transferring phosphorus-containing groups; GO:0016773 phosphotransferase activity, alcohol group as acceptor; GO:0019200 carbohydrate kinase activity;	K12446	E2.7.1.46; L-arabinokinase [EC:2.7.1.46]	osa00520 Amino sugar and nucleotide sugar metabolism - Oryza sativa japonica (Japanese rice) (RefSeq); osa01100 Metabolic pathways - Oryza sativa japonica (Japanese rice) (RefSeq);	PF13528; PF10509	Glycosyl transferase family 1; Galactokinase galactose-binding signature	G	KOG0631	Galactokinase	A0A287LSP7	A0A287TJ16	0.379469
Cluster2	A0A287TH42	Acyltransferase-like protein(predicted) OS=Hordeum vulgare subsp. vulgare OX=112509 PE=4 SV=1	---	1.099	1.129	1.054	1.195	1.269	1.219	0.913	0.965	0.955	0.677	0.768	0.758	0.863	0.0049839	1.122	0.0124205	0.598	0.00029895	0.778	0.0043599	cytoplasm	GO:0006066 alcohol metabolic process; GO:0006629 lipid metabolic process; GO:0006638 neutral lipid metabolic process; GO:0006639 acylglycerol metabolic process; GO:0006641 triglyceride metabolic process; GO:0006720 isoprenoid metabolic process; GO:0006721 terpenoid metabolic process; GO:0008152 metabolic process; GO:0008610 lipid biosynthetic process; GO:0009058 biosynthetic process; GO:0009987 c…	GO:0005622 intracellular; GO:0005623 cell; GO:0005737 cytoplasm; GO:0009507 chloroplast; GO:0009532 plastid stroma; GO:0009536 plastid; GO:0009570 chloroplast stroma; GO:0010287 plastoglobule; GO:0043226 organelle; GO:0043227 membrane-bounded organelle; GO:0043229 intracellular organelle; GO:0043231 intracellular membrane-bounded organelle; GO:0044422 organelle part; GO:0044424 intracellular part…	GO:0003824 catalytic activity; GO:0004144 diacylglycerol O-acyltransferase activity; GO:0008374 O-acyltransferase activity; GO:0016411 acylglycerol O-acyltransferase activity; GO:0016740 transferase activity; GO:0016746 transferase activity, transferring acyl groups; GO:0016747 transferase activity, transferring acyl groups other than amino-acyl groups;									A0A287N0S2	A0A287TH42	0.692592
Cluster2	A0A287T8X2	Catalase OS=Hordeum vulgare subsp. vulgare OX=112509 PE=3 SV=1	---	0.994	0.937	1.002	1.295	1.328	1.373	1.182	1.088	1.101	0.578	0.565	0.555	1.149	0.0141613	1.362	0.00033772	0.425	1.0067e-06	0.504	1.87695e-05	cytoplasm	GO:0000302 response to reactive oxygen species; GO:0006950 response to stress; GO:0006979 response to oxidative stress; GO:0007623 circadian rhythm; GO:0008152 metabolic process; GO:0009056 catabolic process; GO:0009266 response to temperature stimulus; GO:0009409 response to cold; GO:0009410 response to xenobiotic stimulus; GO:0009628 response to abiotic stimulus; GO:0009631 cold acclimation; GO…	GO:0005622 intracellular; GO:0005623 cell; GO:0005737 cytoplasm; GO:0005739 mitochondrion; GO:0005777 peroxisome; GO:0042579 microbody; GO:0043226 organelle; GO:0043227 membrane-bounded organelle; GO:0043229 intracellular organelle; GO:0043231 intracellular membrane-bounded organelle; GO:0044424 intracellular part; GO:0044444 cytoplasmic part; GO:0044464 cell part;	GO:0003824 catalytic activity; GO:0004096 catalase activity; GO:0004601 peroxidase activity; GO:0005488 binding; GO:0016209 antioxidant activity; GO:0016491 oxidoreductase activity; GO:0016684 oxidoreductase activity, acting on peroxide as acceptor; GO:0020037 heme binding; GO:0046906 tetrapyrrole binding; GO:0048037 cofactor binding; GO:0097159 organic cyclic compound binding; GO:1901363 heteroc…	K03781	katE, CAT, catB, srpA; catalase [EC:1.11.1.6]	osa00380 Tryptophan metabolism - Oryza sativa japonica (Japanese rice) (RefSeq); osa00630 Glyoxylate and dicarboxylate metabolism - Oryza sativa japonica (Japanese rice) (RefSeq); osa01100 Metabolic pathways - Oryza sativa japonica (Japanese rice) (RefSeq); osa01110 Biosynthesis of secondary metabolites - Oryza sativa japonica (Japanese rice) (RefSeq); osa01200 Carbon metabolism - Oryza sativa ja…	PF00199	Catalase	P	KOG0047	Catalase	F2D0U3	A0A287T8X2	0.517067
Cluster2	A0A287SXA5	DPP6 N-terminal domain-like protein(predicted) OS=Hordeum vulgare subsp. vulgare OX=112509 PE=4 SV=1	---	1.479	1.429	1.475	1.783	1.799	1.827	0.428	0.439	0.437	0.309	0.299	0.296	0.298	4.6422e-8	1.234	8.4435e-05	0.167	1.4051e-8	0.693	1.86543e-05	chloroplast												M0WV56	A0A287SXA5	0.334599
Cluster2	A0A287SNX7	Chlorophyll a-b binding protein, chloroplastic OS=Hordeum vulgare subsp. vulgare OX=112509 PE=3 SV=1	---	0.184	1.314	1.055	1.143	1.51	1.452	0.748	0.94	0.946	0.804	0.96	0.944	1.032	0.6609	1.608	0.34902	0.66	0.0165623	1.028	0.76682	chloroplast		GO:0005622 intracellular; GO:0005623 cell; GO:0005737 cytoplasm; GO:0009507 chloroplast; GO:0009534 chloroplast thylakoid; GO:0009535 chloroplast thylakoid membrane; GO:0009536 plastid; GO:0009579 thylakoid; GO:0016020 membrane; GO:0031976 plastid thylakoid; GO:0031984 organelle subcompartment; GO:0034357 photosynthetic membrane; GO:0042651 thylakoid membrane; GO:0043226 organelle; GO:0043227 mem…		K08912	LHCB1; light-harvesting complex II chlorophyll a/b binding protein 1	osa00196 Photosynthesis - antenna proteins - Oryza sativa japonica (Japanese rice) (RefSeq); osa01100 Metabolic pathways - Oryza sativa japonica (Japanese rice) (RefSeq);						A0A287JHL3	A0A287SNX7	0.194934
Cluster2	A0A287SNN6	Zn-dependent hydrolases of the beta-lactamase fold(predicted) OS=Hordeum vulgare subsp. vulgare OX=112509 PE=4 SV=1	---	1.143	1.023	1.117	1.38	1.36	0.946	0.929	0.934	0.872	0.766	0.647	0.883	0.833	0.0107431	1.123	0.46892	0.623	0.0378	0.839	0.119896	nucleus							PF13483	Beta-lactamase superfamily domain				A0A287IY62	A0A287SNN6	0.417238
Cluster2	A0A287SJY8	Putative aldehyde oxidase 3(predicted) OS=Hordeum vulgare subsp. vulgare OX=112509 PE=4 SV=1	---	1.495	1.329	1.543	1.437	1.318	1.376	0.888	0.784	0.837	0.261	0.43	0.302	0.575	0.00067557	0.946	0.35516	0.24	0.00065505	0.396	0.0034039	chloroplast	GO:0006066 alcohol metabolic process; GO:0006082 organic acid metabolic process; GO:0006629 lipid metabolic process; GO:0006714 sesquiterpenoid metabolic process; GO:0006720 isoprenoid metabolic process; GO:0006721 terpenoid metabolic process; GO:0006790 sulfur compound metabolic process; GO:0006807 nitrogen compound metabolic process; GO:0008152 metabolic process; GO:0008299 isoprenoid biosynthe…	GO:0005622 intracellular; GO:0005623 cell; GO:0005737 cytoplasm; GO:0005829 cytosol; GO:0044424 intracellular part; GO:0044444 cytoplasmic part; GO:0044464 cell part;	GO:0000166 nucleotide binding; GO:0003824 catalytic activity; GO:0004029 aldehyde dehydrogenase (NAD) activity; GO:0004031 aldehyde oxidase activity; GO:0005488 binding; GO:0005515 protein binding; GO:0010293 abscisic aldehyde oxidase activity; GO:0016491 oxidoreductase activity; GO:0016620 oxidoreductase activity, acting on the aldehyde or oxo group of donors, NAD or NADP as acceptor; GO:0016623…	K11817	AAO1_2; indole-3-acetaldehyde oxidase [EC:1.2.3.7]	osa00380 Tryptophan metabolism - Oryza sativa japonica (Japanese rice) (RefSeq); osa01100 Metabolic pathways - Oryza sativa japonica (Japanese rice) (RefSeq);	PF00111; PF01799; PF03450; PF01315	2Fe-2S iron-sulfur cluster binding domain; [2Fe-2S] binding domain; CO dehydrogenase flavoprotein C-terminal domain; Aldehyde oxidase and xanthine dehydrogenase, a/b hammerhead domain	F	KOG0430	Xanthine dehydrogenase	F2CQR8	A0A287SJY8	0.600021
Cluster2	A0A287SH05	Peptide transporter PTR2(predicted) OS=Hordeum vulgare subsp. vulgare OX=112509 PE=4 SV=1	---	1.087	1.049	1.089	1.167	1.196	1.208	0.979	1.013	1.034	0.743	0.704	0.731	0.938	0.033536	1.107	0.0030583	0.61	1.64405e-05	0.72	0.000124447	plasma membrane									E	KOG1237	H+/oligopeptide symporter	A0A287TBK2	A0A287SH05	0.675057
Cluster2	A0A287S1F1	Protein DETOXIFICATION OS=Hordeum vulgare subsp. vulgare OX=112509 PE=4 SV=1	---	1.246	0.926	1.067	1.201	1.143	1.415	1.092	0.773	0.985	0.754	0.697	0.7	0.88	0.3827	1.161	0.22944	0.572	0.00132349	0.755	0.061604	plasma membrane				K03327	TC.MATE, SLC47A, norM, mdtK, dinF; multidrug resistance protein, MATE family				V	KOG1347	Uncharacterized membrane protein, predicted efflux pump	A0A287VXQ9	A0A287S1F1	0.450943
Cluster2	A0A287RZN1	UDP-glucose 4-epimerase OS=Hordeum vulgare subsp. vulgare OX=112509 PE=3 SV=1	---	1.027	1.011	1.066	1.288	1.273	1.292	0.937	1.006	0.999	0.644	0.65	0.809	0.948	0.122065	1.241	0.000184032	0.546	0.0146012	0.715	0.0119027	cytoplasm	GO:0007275 multicellular organism development; GO:0009555 pollen development; GO:0032501 multicellular organismal process; GO:0032502 developmental process; GO:0048229 gametophyte development; GO:0048856 anatomical structure development;	GO:0005622 intracellular; GO:0005623 cell; GO:0005737 cytoplasm; GO:0005829 cytosol; GO:0005886 plasma membrane; GO:0016020 membrane; GO:0044424 intracellular part; GO:0044444 cytoplasmic part; GO:0044464 cell part; GO:0071944 cell periphery;	GO:0003824 catalytic activity; GO:0003978 UDP-glucose 4-epimerase activity; GO:0016853 isomerase activity; GO:0016854 racemase and epimerase activity; GO:0016857 racemase and epimerase activity, acting on carbohydrates and derivatives; GO:0050373 UDP-arabinose 4-epimerase activity;	K01784	galE, GALE; UDP-glucose 4-epimerase [EC:5.1.3.2]	osa00052 Galactose metabolism - Oryza sativa japonica (Japanese rice) (RefSeq); osa00520 Amino sugar and nucleotide sugar metabolism - Oryza sativa japonica (Japanese rice) (RefSeq); osa01100 Metabolic pathways - Oryza sativa japonica (Japanese rice) (RefSeq);			M	KOG1371	UDP-glucose 4-epimerase/UDP-sulfoquinovose synthase	A0A287KM84	A0A287RZN1	0.607574
Cluster2	A0A287RYP0	C2 NT-type domain-containing protein OS=Hordeum vulgare subsp. vulgare OX=112509 PE=4 SV=1	---	1.039	1.077	1.064	1.322	1.382	1.31	0.88	0.841	0.867	0.715	0.771	0.729	0.814	0.00026311	1.262	0.00028418	0.552	2.4527e-05	0.856	0.0040219	nucleus	GO:0006810 transport; GO:0006928 movement of cell or subcellular component; GO:0006950 response to stress; GO:0006970 response to osmotic stress; GO:0006996 organelle organization; GO:0007097 nuclear migration; GO:0009314 response to radiation; GO:0009416 response to light stimulus; GO:0009628 response to abiotic stimulus; GO:0009637 response to blue light; GO:0009657 plastid organization; GO:000…	GO:0005622 intracellular; GO:0005623 cell; GO:0005737 cytoplasm; GO:0005829 cytosol; GO:0005886 plasma membrane; GO:0016020 membrane; GO:0044424 intracellular part; GO:0044444 cytoplasmic part; GO:0044464 cell part; GO:0071944 cell periphery;										A0A287FC63	A0A287RYP0	0.484088
Cluster2	A0A287RWG3	Beta-glucosidase 31(predicted) OS=Hordeum vulgare subsp. vulgare OX=112509 PE=3 SV=1	---	1.476	1.258	1.234	1.227	0.957	1.021	1.013	1.133	0.902	0.637	0.608	0.533	0.768	0.03814	0.808	0.082341	0.555	0.0030585	0.583	0.0031625	chloroplast	GO:0008152 metabolic process; GO:0009628 response to abiotic stimulus; GO:0009812 flavonoid metabolic process; GO:0042440 pigment metabolic process; GO:0046283 anthocyanin-containing compound metabolic process; GO:0050896 response to stimulus; GO:0071704 organic substance metabolic process; GO:0080167 response to karrikin; GO:1901135 carbohydrate derivative metabolic process; GO:1901657 glycosyl …	GO:0005622 intracellular; GO:0005623 cell; GO:0005737 cytoplasm; GO:0005773 vacuole; GO:0005777 peroxisome; GO:0042579 microbody; GO:0043226 organelle; GO:0043227 membrane-bounded organelle; GO:0043229 intracellular organelle; GO:0043231 intracellular membrane-bounded organelle; GO:0044424 intracellular part; GO:0044444 cytoplasmic part; GO:0044464 cell part;	GO:0003824 catalytic activity; GO:0004553 hydrolase activity, hydrolyzing O-glycosyl compounds; GO:0008422 beta-glucosidase activity; GO:0015926 glucosidase activity; GO:0016787 hydrolase activity; GO:0016798 hydrolase activity, acting on glycosyl bonds;	K01188	E3.2.1.21; beta-glucosidase [EC:3.2.1.21]	osa00460 Cyanoamino acid metabolism - Oryza sativa japonica (Japanese rice) (RefSeq); osa00500 Starch and sucrose metabolism - Oryza sativa japonica (Japanese rice) (RefSeq); osa00940 Phenylpropanoid biosynthesis - Oryza sativa japonica (Japanese rice) (RefSeq); osa01100 Metabolic pathways - Oryza sativa japonica (Japanese rice) (RefSeq); osa01110 Biosynthesis of secondary metabolites - Oryza sat…	PF00232	Glycosyl hydrolase family 1	G	KOG0626	Beta-glucosidase, lactase phlorizinhydrolase, and related proteins	A0A287PMF6	A0A287RWG3	0.432738
Cluster2	A0A287Q486	Germin-like protein OS=Hordeum vulgare subsp. vulgare OX=112509 PE=3 SV=1	---	1.754	1.816	1.81	1.235	1.3	1.378	0.593	0.583	0.627	0.297	0.246	0.36	0.335	7.6609e-7	0.727	0.00067957	0.231	0.00020363	0.501	0.0032993	extracellular	GO:0006950 response to stress; GO:0006970 response to osmotic stress; GO:0009628 response to abiotic stimulus; GO:0009651 response to salt stress; GO:0050896 response to stimulus;	GO:0000325 plant-type vacuole; GO:0005576 extracellular region; GO:0005618 cell wall; GO:0005622 intracellular; GO:0005623 cell; GO:0005737 cytoplasm; GO:0005773 vacuole; GO:0005886 plasma membrane; GO:0016020 membrane; GO:0030312 external encapsulating structure; GO:0031012 extracellular matrix; GO:0043226 organelle; GO:0043227 membrane-bounded organelle; GO:0043229 intracellular organelle; GO:0…					PF00190	Cupin				A0A287MXA5	A0A287Q486	0.45201
Cluster2	A0A287PVF3	PHB domain-containing protein OS=Hordeum vulgare subsp. vulgare OX=112509 PE=4 SV=1	---	1.103	1.096	1.127	1.19	1.217	1.168	0.884	0.898	0.991	0.79	0.744	0.793	0.834	0.007581	1.075	0.007762	0.651	5.7814e-05	0.839	0.0134203	cytoplasm									C	KOG2620	Prohibitins and stomatins of the PID superfamily	A0A287UQJ1	A0A287PVF3	0.674781
Cluster2	A0A287PL36	NADH dehydrogenase [ubiquinone] 1 alpha subcomplex subunit 13-B(predicted) OS=Hordeum vulgare subsp. vulgare OX=112509 PE=4 SV=1	---	0.394	1.145	1.251	1.215	1.17	1.34	1.021	1.045	1.048	0.944	0.638	0.789	1.116	0.60188	1.335	0.391	0.637	0.0183167	0.761	0.128578	cytoplasm	GO:0000003 reproduction; GO:0003006 developmental process involved in reproduction; GO:0007275 multicellular organism development; GO:0008152 metabolic process; GO:0009790 embryo development; GO:0009791 post-embryonic development; GO:0009793 embryo development ending in seed dormancy; GO:0009853 photorespiration; GO:0009987 cellular process; GO:0010154 fruit development; GO:0022414 reproductive p…	GO:0005622 intracellular; GO:0005623 cell; GO:0005737 cytoplasm; GO:0005739 mitochondrion; GO:0005740 mitochondrial envelope; GO:0005743 mitochondrial inner membrane; GO:0005746 mitochondrial respiratory chain; GO:0005747 mitochondrial respiratory chain complex I; GO:0016020 membrane; GO:0019866 organelle inner membrane; GO:0030964 NADH dehydrogenase complex; GO:0031090 organelle membrane; GO:003…		K11353	NDUFA13; NADH dehydrogenase (ubiquinone) 1 alpha subcomplex subunit 13	osa00190 Oxidative phosphorylation - Oryza sativa japonica (Japanese rice) (RefSeq); osa01100 Metabolic pathways - Oryza sativa japonica (Japanese rice) (RefSeq);			CD	KOG3300	NADH:ubiquinone oxidoreductase, B16.6 subunit/cell death-regulatory protein	A0A287FI65	A0A287PL36	0.246071
Cluster2	A0A287MX56	SAM_MPBQ_MSBQ_MT domain-containing protein OS=Hordeum vulgare subsp. vulgare OX=112509 PE=4 SV=1	---	1.36	1.261	1.263	0.862	0.846	0.903	1.113	1.169	1.107	0.682	0.703	0.73	0.873	0.0110002	0.672	0.00023535	0.81	0.00158257	0.624	5.8092e-05	cytoplasm	GO:0006732 coenzyme metabolic process; GO:0006766 vitamin metabolic process; GO:0006775 fat-soluble vitamin metabolic process; GO:0008152 metabolic process; GO:0009058 biosynthetic process; GO:0009108 coenzyme biosynthetic process; GO:0009110 vitamin biosynthetic process; GO:0009987 cellular process; GO:0010189 vitamin E biosynthetic process; GO:0010236 plastoquinone biosynthetic process; GO:0018…	GO:0005622 intracellular; GO:0005623 cell; GO:0005737 cytoplasm; GO:0009507 chloroplast; GO:0009526 plastid envelope; GO:0009528 plastid inner membrane; GO:0009536 plastid; GO:0009706 chloroplast inner membrane; GO:0009941 chloroplast envelope; GO:0016020 membrane; GO:0019866 organelle inner membrane; GO:0031090 organelle membrane; GO:0031967 organelle envelope; GO:0031969 chloroplast membrane; G…	GO:0003824 catalytic activity; GO:0008168 methyltransferase activity; GO:0008757 S-adenosylmethionine-dependent methyltransferase activity; GO:0016740 transferase activity; GO:0016741 transferase activity, transferring one-carbon groups; GO:0051741 2-methyl-6-phytyl-1,4-benzoquinone methyltransferase activity;	K12502	VTE3, APG1; MPBQ/MSBQ methyltransferase [EC:2.1.1.295]	osa00130 Ubiquinone and other terpenoid-quinone biosynthesis - Oryza sativa japonica (Japanese rice) (RefSeq); osa01100 Metabolic pathways - Oryza sativa japonica (Japanese rice) (RefSeq); osa01110 Biosynthesis of secondary metabolites - Oryza sativa japonica (Japanese rice) (RefSeq);	PF13649	Methyltransferase domain	H	KOG1540	Ubiquinone biosynthesis methyltransferase COQ5	A0A287MJ98	A0A287MX56	0.287418
Cluster2	A0A287MJ98	(1-->3)-beta-D-glucan glucanohydrolase isoenzyme GIII(predicted) OS=Hordeum vulgare subsp. vulgare OX=112509 PE=3 SV=1	---	0.844	0.825	0.306	1.605	1.598	1.419	1.386	1.232	0.699	0.617	0.626	0.844	1.679	0.22018	2.34	0.106876	0.452	0.00184387	0.629	0.139038	chloroplast							PF00332	Glycosyl hydrolases family 17				A0A287NRS7	A0A287MJ98	0.243895
Cluster2	A0A287MFF3	Carboxypeptidase OS=Hordeum vulgare subsp. vulgare OX=112509 PE=3 SV=1	---	1.201	1.242	1.281	1.249	1.219	1.211	0.86	0.836	0.813	0.686	0.698	0.704	0.674	8.4754e-05	0.988	0.59884	0.568	6.2223e-7	0.832	0.0005167	chloroplast	GO:0008152 metabolic process; GO:0019748 secondary metabolic process;	GO:0005576 extracellular region; GO:0005622 intracellular; GO:0005623 cell; GO:0005737 cytoplasm; GO:0005773 vacuole; GO:0005777 peroxisome; GO:0042579 microbody; GO:0043226 organelle; GO:0043227 membrane-bounded organelle; GO:0043229 intracellular organelle; GO:0043231 intracellular membrane-bounded organelle; GO:0044424 intracellular part; GO:0044444 cytoplasmic part; GO:0044464 cell part;	GO:0003824 catalytic activity; GO:0016740 transferase activity; GO:0016746 transferase activity, transferring acyl groups; GO:0016747 transferase activity, transferring acyl groups other than amino-acyl groups;	K16296	SCPL-I; serine carboxypeptidase-like clade I [EC:3.4.16.-]		PF00450	Serine carboxypeptidase	O	KOG1282	Serine carboxypeptidases (lysosomal cathepsin A)	A0A287MP90	A0A287MFF3	0.439053
Cluster2	A0A287M0E0	Glyco_hydro_18 domain-containing protein OS=Hordeum vulgare subsp. vulgare OX=112509 PE=3 SV=1	---	1.376	1.389	1.387	1.079	1.068	1.121	0.873	0.839	0.925	0.598	0.634	0.711	0.635	0.0039	0.787	9.517e-05	0.595	0.00059572	0.737	0.0061774	chloroplast				K01183	E3.2.1.14; chitinase [EC:3.2.1.14]	osa00520 Amino sugar and nucleotide sugar metabolism - Oryza sativa japonica (Japanese rice) (RefSeq); osa01100 Metabolic pathways - Oryza sativa japonica (Japanese rice) (RefSeq);	PF00704	Glycosyl hydrolases family 18	G	KOG4701	Chitinase	A0A287PNA7	A0A287M0E0	0.386848
Cluster2	A0A287LNW0	Pentatricopeptide (PPR) repeat protein-like(predicted) OS=Hordeum vulgare subsp. vulgare OX=112509 PE=4 SV=1	---	1.161	1.101	1.024	1.246	1.151	1.236	0.945	0.932	0.922	0.766	0.749	0.767	0.852	0.0127364	1.106	0.084463	0.628	6.0441e-05	0.815	4.0605e-05	cytoplasm				K01455	E3.5.1.49; formamidase [EC:3.5.1.49]	osa00460 Cyanoamino acid metabolism - Oryza sativa japonica (Japanese rice) (RefSeq); osa00630 Glyoxylate and dicarboxylate metabolism - Oryza sativa japonica (Japanese rice) (RefSeq); osa00910 Nitrogen metabolism - Oryza sativa japonica (Japanese rice) (RefSeq); osa01100 Metabolic pathways - Oryza sativa japonica (Japanese rice) (RefSeq); osa01200 Carbon metabolism - Oryza sativa japonica (Japan…						A0A287L9G7	A0A287LNW0	0.662474
Cluster2	A0A287LJN3	Dehydrogenase (Fragment)(predicted) OS=Hordeum vulgare subsp. vulgare OX=112509 PE=4 SV=1	---	1.028	0.861	1.076	1.046	1.254	1.207	1.088	1.206	1.008	0.749	0.911	0.567	1.114	0.26996	1.183	0.125161	0.635	0.033903	0.674	0.049501	chloroplast		GO:0005622 intracellular; GO:0005623 cell; GO:0005737 cytoplasm; GO:0005829 cytosol; GO:0044424 intracellular part; GO:0044444 cytoplasmic part; GO:0044464 cell part;		K00020	mmsB, HIBADH; 3-hydroxyisobutyrate dehydrogenase [EC:1.1.1.31]	osa00280 Valine, leucine and isoleucine degradation - Oryza sativa japonica (Japanese rice) (RefSeq); osa01100 Metabolic pathways - Oryza sativa japonica (Japanese rice) (RefSeq);	PF03446	NAD binding domain of 6-phosphogluconate dehydrogenase	I	KOG0409	Predicted dehydrogenase	A0A287VRA9	A0A287LJN3	0.362318
Cluster2	A0A287KEP7	Abhydrolase_3 domain-containing protein OS=Hordeum vulgare subsp. vulgare OX=112509 PE=4 SV=1	---	0.998	1.061	0.967	1.256	1.46	1.108	0.883	0.962	0.982	0.765	0.739	0.819	0.934	0.182604	1.264	0.053502	0.607	0.0044437	0.822	0.0115042	cytoplasm							PF07859	alpha/beta hydrolase fold	V	KOG1515	Arylacetamide deacetylase	A0A287J9N0	A0A287KEP7	0.483272
Cluster2	A0A287K830	Lipase_3 domain-containing protein OS=Hordeum vulgare subsp. vulgare OX=112509 PE=4 SV=1	---	1.552	1.575	1.498	1.188	1.373	1.147	0.88	0.81	0.577	0.32	0.525	0.558	0.49	0.030361	0.802	0.0171596	0.378	0.0056584	0.619	0.086917	cytoplasm									I	KOG4569	Predicted lipase	A0A287MGA3	A0A287K830	0.405243
Cluster2	A0A287K0F8	ABC transporter domain-containing protein OS=Hordeum vulgare subsp. vulgare OX=112509 PE=4 SV=1	---	0.98	1.068	1.065	1.226	1.257	1.109	0.945	1.028	0.931	0.8	0.771	0.82	0.933	0.170905	1.154	0.040098	0.666	0.00065848	0.823	0.0055775	extracellular	GO:0006810 transport; GO:0051179 localization; GO:0051234 establishment of localization; GO:0055085 transmembrane transport;	GO:0005622 intracellular; GO:0005623 cell; GO:0005737 cytoplasm; GO:0005886 plasma membrane; GO:0009507 chloroplast; GO:0009526 plastid envelope; GO:0009536 plastid; GO:0009941 chloroplast envelope; GO:0016020 membrane; GO:0016021 integral component of membrane; GO:0031224 intrinsic component of membrane; GO:0031967 organelle envelope; GO:0031975 envelope; GO:0043226 organelle; GO:0043227 membran…	GO:0003824 catalytic activity; GO:0005215 transporter activity; GO:0015399 primary active transmembrane transporter activity; GO:0015405 P-P-bond-hydrolysis-driven transmembrane transporter activity; GO:0016462 pyrophosphatase activity; GO:0016787 hydrolase activity; GO:0016817 hydrolase activity, acting on acid anhydrides; GO:0016818 hydrolase activity, acting on acid anhydrides, in phosphorus-c…				PF00005	ABC transporter	Q	KOG0061	Transporter, ABC superfamily (Breast cancer resistance protein)	A0A287S930	A0A287K0F8	0.590382
Cluster2	A0A287JJE7	ABC1 domain-containing protein OS=Hordeum vulgare subsp. vulgare OX=112509 PE=4 SV=1	---	1.204	1.079	1.036	1.372	1.373	1.332	0.915	0.836	0.961	0.699	0.605	0.586	0.817	0.029282	1.228	0.0106952	0.464	0.000155715	0.697	0.0059241	chloroplast		GO:0005622 intracellular; GO:0005623 cell; GO:0005737 cytoplasm; GO:0009507 chloroplast; GO:0009532 plastid stroma; GO:0009536 plastid; GO:0009570 chloroplast stroma; GO:0010287 plastoglobule; GO:0043226 organelle; GO:0043227 membrane-bounded organelle; GO:0043229 intracellular organelle; GO:0043231 intracellular membrane-bounded organelle; GO:0044422 organelle part; GO:0044424 intracellular part…		K08869	ADCK, ABC1; aarF domain-containing kinase				S	KOG1235	Predicted unusual protein kinase	A0A287MCM4	A0A287JJE7	0.645226
Cluster2	A0A287ITT1	OSIGBa0157A06.4 protein(predicted) OS=Hordeum vulgare subsp. vulgare OX=112509 PE=4 SV=1	---	1.185	1.074	1.265	1.334	1.179	1.125	0.782	0.934	0.934	0.728	0.722	0.739	0.752	0.0196247	1.032	0.67458	0.602	0.010138	0.826	0.087723	chloroplast												A0A287X3H7	A0A287ITT1	0.495795
Cluster2	A0A287HRN9	Plasma membrane intrinsic protein(predicted) OS=Hordeum vulgare subsp. vulgare OX=112509 PE=3 SV=1	---	1.116	1.079	1.177	1.205	1.1	1.193	0.819	0.879	1.176	0.714	0.778	0.763	0.852	0.20498	1.037	0.39552	0.645	0.00034477	0.785	0.112463	chloroplast	GO:0006810 transport; GO:0006811 ion transport; GO:0006833 water transport; GO:0009987 cellular process; GO:0016043 cellular component organization; GO:0022607 cellular component assembly; GO:0034220 ion transmembrane transport; GO:0042044 fluid transport; GO:0043933 macromolecular complex subunit organization; GO:0044085 cellular component biogenesis; GO:0051179 localization; GO:0051234 establis…	GO:0005623 cell; GO:0005886 plasma membrane; GO:0005887 integral component of plasma membrane; GO:0016020 membrane; GO:0016021 integral component of membrane; GO:0031224 intrinsic component of membrane; GO:0031226 intrinsic component of plasma membrane; GO:0032991 macromolecular complex; GO:0044425 membrane part; GO:0044459 plasma membrane part; GO:0044464 cell part; GO:0071944 cell periphery;	GO:0005215 transporter activity; GO:0005372 water transmembrane transporter activity; GO:0015250 water channel activity; GO:0015267 channel activity; GO:0015318 inorganic solute uptake transmembrane transporter activity; GO:0022803 passive transmembrane transporter activity; GO:0022838 substrate-specific channel activity; GO:0022857 transmembrane transporter activity;	K09872	PIP; aquaporin PIP				P	KOG0223	Aquaporin (major intrinsic protein family)	A0A287FUT0	A0A287HRN9	0.482959
Cluster2	A0A287HDI0	Carboxypeptidase OS=Hordeum vulgare subsp. vulgare OX=112509 PE=3 SV=1	---	1.057	1.061	1.037	1.3	1.322	1.246	0.875	0.899	0.882	0.786	0.749	0.785	0.842	8.3696e-05	1.226	0.00042481	0.6	2.3692e-05	0.873	0.00159722	chloroplast				K16297	SCPL-II; serine carboxypeptidase-like clade II [EC:3.4.16.-]		PF00450	Serine carboxypeptidase	O	KOG1282	Serine carboxypeptidases (lysosomal cathepsin A)	A0A287Q837	A0A287HDI0	0.501259
Cluster2	A0A287H3Y7	Amine oxidase OS=Hordeum vulgare subsp. vulgare OX=112509 PE=3 SV=1	---	1.157	1.223	1.223	1.414	1.266	1.316	0.77	0.95	0.89	0.632	0.477	0.68	0.724	0.0073238	1.109	0.051022	0.448	0.0019591	0.685	0.036558	cytoplasm	GO:0001101 response to acid chemical; GO:0001505 regulation of neurotransmitter levels; GO:0006807 nitrogen compound metabolic process; GO:0006809 nitric oxide biosynthetic process; GO:0007154 cell communication; GO:0007165 signal transduction; GO:0008152 metabolic process; GO:0009058 biosynthetic process; GO:0009719 response to endogenous stimulus; GO:0009725 response to hormone; GO:0009737 resp…			K00276	AOC3, AOC2, tynA; primary-amine oxidase [EC:1.4.3.21]	osa00260 Glycine, serine and threonine metabolism - Oryza sativa japonica (Japanese rice) (RefSeq); osa00350 Tyrosine metabolism - Oryza sativa japonica (Japanese rice) (RefSeq); osa00360 Phenylalanine metabolism - Oryza sativa japonica (Japanese rice) (RefSeq); osa00410 beta-Alanine metabolism - Oryza sativa japonica (Japanese rice) (RefSeq); osa00950 Isoquinoline alkaloid biosynthesis - Oryza s…	PF02728; PF01179	Copper amine oxidase, N3 domain; Copper amine oxidase, enzyme domain	Q	KOG1186	Copper amine oxidase	A0A287F5K5	A0A287H3Y7	0.621773
Cluster2	A0A287GDG0	Protein kinase domain-containing protein OS=Hordeum vulgare subsp. vulgare OX=112509 PE=4 SV=1	---	1.214	1.2	1.062	1.194	1.193	1.244	0.868	0.892	0.863	0.759	0.753	0.758	0.755	0.0031238	1.045	0.37128	0.625	2.379e-06	0.865	0.0001604	cytoplasm	GO:0006464 cellular protein modification process; GO:0006468 protein phosphorylation; GO:0006793 phosphorus metabolic process; GO:0006796 phosphate-containing compound metabolic process; GO:0006807 nitrogen compound metabolic process; GO:0007623 circadian rhythm; GO:0008152 metabolic process; GO:0009314 response to radiation; GO:0009416 response to light stimulus; GO:0009628 response to abiotic s…	GO:0005622 intracellular; GO:0005623 cell; GO:0005737 cytoplasm; GO:0009507 chloroplast; GO:0009536 plastid; GO:0009579 thylakoid; GO:0016020 membrane; GO:0034357 photosynthetic membrane; GO:0042651 thylakoid membrane; GO:0043226 organelle; GO:0043227 membrane-bounded organelle; GO:0043229 intracellular organelle; GO:0043231 intracellular membrane-bounded organelle; GO:0044424 intracellular part;…	GO:0003824 catalytic activity; GO:0004672 protein kinase activity; GO:0004674 protein serine/threonine kinase activity; GO:0016301 kinase activity; GO:0016740 transferase activity; GO:0016772 transferase activity, transferring phosphorus-containing groups; GO:0016773 phosphotransferase activity, alcohol group as acceptor;				PF00069	Protein kinase domain	T	KOG0594	Protein kinase PCTAIRE and related kinases	F2DY57	A0A287GDG0	0.473464
Cluster2	A0A287FVH3	Pyruvate, phosphate dikinase OS=Hordeum vulgare subsp. vulgare OX=112509 PE=4 SV=1	---	1.223	1.258	1.293	1.334	1.303	1.333	0.81	0.793	0.785	0.612	0.619	0.636	0.633	1.79909e-05	1.052	0.046318	0.47	3.3239e-7	0.782	7.7049e-05	cytoplasm		GO:0005622 intracellular; GO:0005623 cell; GO:0005634 nucleus; GO:0005737 cytoplasm; GO:0005829 cytosol; GO:0009507 chloroplast; GO:0009532 plastid stroma; GO:0009536 plastid; GO:0009570 chloroplast stroma; GO:0043226 organelle; GO:0043227 membrane-bounded organelle; GO:0043229 intracellular organelle; GO:0043231 intracellular membrane-bounded organelle; GO:0044422 organelle part; GO:0044424 intr…		K01006	ppdK; pyruvate, orthophosphate dikinase [EC:2.7.9.1]	osa00620 Pyruvate metabolism - Oryza sativa japonica (Japanese rice) (RefSeq); osa00710 Carbon fixation in photosynthetic organisms - Oryza sativa japonica (Japanese rice) (RefSeq); osa01100 Metabolic pathways - Oryza sativa japonica (Japanese rice) (RefSeq); osa01200 Carbon metabolism - Oryza sativa japonica (Japanese rice) (RefSeq);	PF02896	PEP-utilising enzyme, TIM barrel domain				F2CQ53	A0A287FVH3	0.537821
Cluster2	A0A287FHH7	Xanthine dehydrogenase(predicted) OS=Hordeum vulgare subsp. vulgare OX=112509 PE=4 SV=1	---	1.213	1.333	1.398	1.096	0.983	1.142	1.074	0.984	0.949	0.572	0.643	0.615	0.762	0.0081976	0.817	0.029503	0.568	0.0005569	0.609	0.00058151	plasma membrane	GO:0000302 response to reactive oxygen species; GO:0001101 response to acid chemical; GO:0006139 nucleobase-containing compound metabolic process; GO:0006144 purine nucleobase metabolic process; GO:0006145 purine nucleobase catabolic process; GO:0006725 cellular aromatic compound metabolic process; GO:0006801 superoxide metabolic process; GO:0006807 nitrogen compound metabolic process; GO:0006950…	GO:0005622 intracellular; GO:0005623 cell; GO:0005737 cytoplasm; GO:0005829 cytosol; GO:0044424 intracellular part; GO:0044444 cytoplasmic part; GO:0044464 cell part;	GO:0000166 nucleotide binding; GO:0003824 catalytic activity; GO:0004854 xanthine dehydrogenase activity; GO:0005488 binding; GO:0016491 oxidoreductase activity; GO:0016725 oxidoreductase activity, acting on CH or CH2 groups; GO:0016726 oxidoreductase activity, acting on CH or CH2 groups, NAD or NADP as acceptor; GO:0016903 oxidoreductase activity, acting on the aldehyde or oxo group of donors; G…	K00106	XDH; xanthine dehydrogenase/oxidase [EC:1.17.1.4 1.17.3.2]	osa00230 Purine metabolism - Oryza sativa japonica (Japanese rice) (RefSeq); osa00232 Caffeine metabolism - Oryza sativa japonica (Japanese rice) (RefSeq); osa01100 Metabolic pathways - Oryza sativa japonica (Japanese rice) (RefSeq); osa01110 Biosynthesis of secondary metabolites - Oryza sativa japonica (Japanese rice) (RefSeq); osa04146 Peroxisome - Oryza sativa japonica (Japanese rice) (RefSeq);	PF00111; PF01799; PF03450; PF01315	2Fe-2S iron-sulfur cluster binding domain; [2Fe-2S] binding domain; CO dehydrogenase flavoprotein C-terminal domain; Aldehyde oxidase and xanthine dehydrogenase, a/b hammerhead domain	F	KOG0430	Xanthine dehydrogenase	A0A287GYL8	A0A287FHH7	0.460466
Cluster2	A0A287FFW0	Aldo_ket_red domain-containing protein OS=Hordeum vulgare subsp. vulgare OX=112509 PE=4 SV=1	---	1.123	1.01	1.354	1.103	1.372	1.067	1.078	1.091	0.966	0.618	0.39	0.829	0.899	0.34548	1.016	0.89282	0.519	0.040459	0.586	0.060059	cytoplasm	GO:0006081 cellular aldehyde metabolic process; GO:0006725 cellular aromatic compound metabolic process; GO:0006732 coenzyme metabolic process; GO:0006766 vitamin metabolic process; GO:0006767 water-soluble vitamin metabolic process; GO:0006793 phosphorus metabolic process; GO:0006796 phosphate-containing compound metabolic process; GO:0006807 nitrogen compound metabolic process; GO:0008152 metab…	GO:0005622 intracellular; GO:0005623 cell; GO:0005737 cytoplasm; GO:0009507 chloroplast; GO:0009526 plastid envelope; GO:0009532 plastid stroma; GO:0009534 chloroplast thylakoid; GO:0009535 chloroplast thylakoid membrane; GO:0009536 plastid; GO:0009570 chloroplast stroma; GO:0009579 thylakoid; GO:0009941 chloroplast envelope; GO:0010287 plastoglobule; GO:0016020 membrane; GO:0031967 organelle env…	GO:0000166 nucleotide binding; GO:0003824 catalytic activity; GO:0004033 aldo-keto reductase (NADP) activity; GO:0005488 binding; GO:0016491 oxidoreductase activity; GO:0016614 oxidoreductase activity, acting on CH-OH group of donors; GO:0016616 oxidoreductase activity, acting on the CH-OH group of donors, NAD or NADP as acceptor; GO:0036094 small molecule binding; GO:0043167 ion binding; GO:0043…	K05275	E1.1.1.65; pyridoxine 4-dehydrogenase [EC:1.1.1.65]	osa00750 Vitamin B6 metabolism - Oryza sativa japonica (Japanese rice) (RefSeq); osa01100 Metabolic pathways - Oryza sativa japonica (Japanese rice) (RefSeq);	PF00248	Aldo/keto reductase family	C	KOG1575	Voltage-gated shaker-like K+ channel, subunit beta/KCNAB	A0A287GLQ0	A0A287FFW0	0.431895
Cluster2	A0A287FEE6	AAI domain-containing protein OS=Hordeum vulgare subsp. vulgare OX=112509 PE=4 SV=1	---	1.234	1.27	1.333	1.125	1.233	1.065	0.931	0.94	0.883	0.695	0.662	0.63	0.718	0.00036463	0.892	0.075056	0.58	0.00045522	0.721	0.00068146	extracellular												F2DHV6	A0A287FEE6	0.504283
Cluster2	A0A287FC63	Alpha-galactosidase OS=Hordeum vulgare subsp. vulgare OX=112509 PE=3 SV=1	---	1.251	1.256	1.302	1.203	1.264	1.215	0.827	0.841	0.81	0.655	0.686	0.692	0.651	1.67924e-05	0.967	0.160324	0.552	1.64277e-05	0.82	0.00060398	chloroplast	GO:0007275 multicellular organism development; GO:0009605 response to external stimulus; GO:0009607 response to biotic stimulus; GO:0009620 response to fungus; GO:0009653 anatomical structure morphogenesis; GO:0009909 regulation of flower development; GO:0009911 positive regulation of flower development; GO:0009965 leaf morphogenesis; GO:0010016 shoot system morphogenesis; GO:0032501 multicellula…	GO:0005576 extracellular region; GO:0005618 cell wall; GO:0005623 cell; GO:0009505 plant-type cell wall; GO:0030312 external encapsulating structure; GO:0044464 cell part; GO:0048046 apoplast; GO:0071944 cell periphery;	GO:0003824 catalytic activity; GO:0004553 hydrolase activity, hydrolyzing O-glycosyl compounds; GO:0004557 alpha-galactosidase activity; GO:0015925 galactosidase activity; GO:0016787 hydrolase activity; GO:0016798 hydrolase activity, acting on glycosyl bonds;	K07407	E3.2.1.22B, galA, rafA; alpha-galactosidase [EC:3.2.1.22]	osa00052 Galactose metabolism - Oryza sativa japonica (Japanese rice) (RefSeq); osa00561 Glycerolipid metabolism - Oryza sativa japonica (Japanese rice) (RefSeq); osa00600 Sphingolipid metabolism - Oryza sativa japonica (Japanese rice) (RefSeq); osa00603 Glycosphingolipid biosynthesis - globo and isoglobo series - Oryza sativa japonica (Japanese rice) (RefSeq); osa01100 Metabolic pathways - Oryza…			G	KOG2366	Alpha-D-galactosidase (melibiase)	A0A287UMN5	A0A287FC63	0.422209
Cluster2	A0A287EXY1	Acyl-coenzyme A oxidase 4, peroxisomal(predicted) OS=Hordeum vulgare subsp. vulgare OX=112509 PE=3 SV=1	---	1.053	1.059	1.11	1.17	1.199	1.228	0.93	0.978	0.959	0.705	0.826	0.783	0.89	0.0062952	1.116	0.0071804	0.643	0.00080071	0.807	0.0113971	chloroplast				K00232	E1.3.3.6, ACOX1, ACOX3; acyl-CoA oxidase [EC:1.3.3.6]	osa00071 Fatty acid degradation - Oryza sativa japonica (Japanese rice) (RefSeq); osa00410 beta-Alanine metabolism - Oryza sativa japonica (Japanese rice) (RefSeq); osa00592 alpha-Linolenic acid metabolism - Oryza sativa japonica (Japanese rice) (RefSeq); osa00640 Propanoate metabolism - Oryza sativa japonica (Japanese rice) (RefSeq); osa01040 Biosynthesis of unsaturated fatty acids - Oryza sativ…	PF02771; PF02770; PF00441	Acyl-CoA dehydrogenase, N-terminal domain; Acyl-CoA dehydrogenase, middle domain; Acyl-CoA dehydrogenase, C-terminal domain	E	KOG0138	Glutaryl-CoA dehydrogenase	A0A287MPL4	A0A287EXY1	0.647933
Cluster2	A0A287EVK3	AIG1-type G domain-containing protein OS=Hordeum vulgare subsp. vulgare OX=112509 PE=4 SV=1	---	0.877	0.932	0.9	1.212	1.318	1.402	0.916	0.806	1.082	0.799	0.929	0.826	1.035	0.76806	1.451	0.001257	0.65	0.002262	0.911	0.4135	nucleus							PF04548	AIG1 family				M0WI75	A0A287EVK3	0.315311
Cluster2	A0A287EUP1	Peroxidase OS=Hordeum vulgare subsp. vulgare OX=112509 PE=3 SV=1	---	1.229	1.233	1.263	1.337	1.376	1.271	0.801	0.796	0.806	0.646	0.64	0.603	0.645	6.1424e-7	1.07	0.054224	0.474	1.96355e-05	0.786	0.00038248	Golgi apparatus				K00430	E1.11.1.7; peroxidase [EC:1.11.1.7]	osa00940 Phenylpropanoid biosynthesis - Oryza sativa japonica (Japanese rice) (RefSeq); osa01100 Metabolic pathways - Oryza sativa japonica (Japanese rice) (RefSeq); osa01110 Biosynthesis of secondary metabolites - Oryza sativa japonica (Japanese rice) (RefSeq);	PF00141	Peroxidase				A0A287XA16	A0A287EUP1	0.539742
Cluster3	M0YMJ0	Putative oxidoreductase GLYR1(predicted) OS=Hordeum vulgare subsp. vulgare OX=112509 PE=4 SV=1	---	1.288	1.25	1.358	0.737	0.875	0.632	0.943	0.951	0.879	1.057	1.01	1.02	0.712	0.00061661	0.576	0.0044787	1.376	0.074756	1.113	0.0195041	chloroplast	GO:0008152 metabolic process; GO:0055114 oxidation-reduction process;	GO:0005622 intracellular; GO:0005623 cell; GO:0005737 cytoplasm; GO:0009507 chloroplast; GO:0009532 plastid stroma; GO:0009536 plastid; GO:0009570 chloroplast stroma; GO:0043226 organelle; GO:0043227 membrane-bounded organelle; GO:0043229 intracellular organelle; GO:0043231 intracellular membrane-bounded organelle; GO:0044422 organelle part; GO:0044424 intracellular part; GO:0044434 chloroplast p…	GO:0003824 catalytic activity; GO:0016491 oxidoreductase activity; GO:0016614 oxidoreductase activity, acting on CH-OH group of donors; GO:0016616 oxidoreductase activity, acting on the CH-OH group of donors, NAD or NADP as acceptor; GO:0030267 glyoxylate reductase (NADP) activity;	K18121	GLYR; glyoxylate/succinic semialdehyde reductase [EC:1.1.1.79 1.1.1.-]	osa00630 Glyoxylate and dicarboxylate metabolism - Oryza sativa japonica (Japanese rice) (RefSeq); osa00650 Butanoate metabolism - Oryza sativa japonica (Japanese rice) (RefSeq); osa01100 Metabolic pathways - Oryza sativa japonica (Japanese rice) (RefSeq); osa01200 Carbon metabolism - Oryza sativa japonica (Japanese rice) (RefSeq);	PF03446	NAD binding domain of 6-phosphogluconate dehydrogenase	I	KOG0409	Predicted dehydrogenase		M0YMJ0	0.293517
Cluster3	M0XRY1	GUN4 domain-containing protein OS=Hordeum vulgare subsp. vulgare OX=112509 PE=4 SV=1	---	0.861	0.802	0.881	0.701	0.721	0.685	1.033	1.121	1.125	1.431	1.291	1.347	1.289	0.003076	0.828	0.0041619	1.931	3.9508e-05	1.241	0.0061629	chloroplast	GO:0006725 cellular aromatic compound metabolic process; GO:0006778 porphyrin-containing compound metabolic process; GO:0006779 porphyrin-containing compound biosynthetic process; GO:0006807 nitrogen compound metabolic process; GO:0007154 cell communication; GO:0007165 signal transduction; GO:0008152 metabolic process; GO:0009058 biosynthetic process; GO:0009987 cellular process; GO:0010019 chlor…	GO:0005622 intracellular; GO:0005623 cell; GO:0005737 cytoplasm; GO:0009507 chloroplast; GO:0009536 plastid; GO:0043226 organelle; GO:0043227 membrane-bounded organelle; GO:0043229 intracellular organelle; GO:0043231 intracellular membrane-bounded organelle; GO:0044424 intracellular part; GO:0044444 cytoplasmic part; GO:0044464 cell part;	GO:0005488 binding; GO:0005515 protein binding; GO:0019899 enzyme binding; GO:0046906 tetrapyrrole binding; GO:0097159 organic cyclic compound binding; GO:1901363 heterocyclic compound binding;				PF05419	GUN4-like				A0A287KP21	M0XRY1	0.466006
Cluster3	M0XMD8	Amino_oxidase domain-containing protein OS=Hordeum vulgare subsp. vulgare OX=112509 PE=4 SV=1	---	0.917	0.877	0.912	0.782	0.81	0.747	1.02	1.102	1.173	1.203	1.291	1.166	1.218	0.0102758	0.864	0.0058996	1.565	0.0003015	1.111	0.103859	chloroplast	GO:0006996 organelle organization; GO:0008152 metabolic process; GO:0009657 plastid organization; GO:0009662 etioplast organization; GO:0009987 cellular process; GO:0016043 cellular component organization; GO:0055114 oxidation-reduction process; GO:0071840 cellular component organization or biogenesis;	GO:0005622 intracellular; GO:0005623 cell; GO:0044464 cell part;	GO:0003824 catalytic activity; GO:0016491 oxidoreductase activity; GO:0016853 isomerase activity; GO:0016859 cis-trans isomerase activity; GO:0046608 carotenoid isomerase activity;	K09835	crtISO, crtH; prolycopene isomerase [EC:5.2.1.13]	osa00906 Carotenoid biosynthesis - Oryza sativa japonica (Japanese rice) (RefSeq); osa01100 Metabolic pathways - Oryza sativa japonica (Japanese rice) (RefSeq); osa01110 Biosynthesis of secondary metabolites - Oryza sativa japonica (Japanese rice) (RefSeq);	PF01593	Flavin containing amine oxidoreductase	H	KOG4254	Phytoene desaturase	A0A287TPD0	M0XMD8	0.457589
Cluster3	M0WZB5	Proteasome subunit alpha type OS=Hordeum vulgare subsp. vulgare OX=112509 PE=3 SV=1	---	0.931	1.02	0.918	0.808	0.598	0.947	0.975	1.091	1.072	1.182	1.271	1.189	1.094	0.135981	0.82	0.196538	1.548	0.02942	1.161	0.023476	chloroplast	GO:0010035 response to inorganic substance; GO:0010038 response to metal ion; GO:0042221 response to chemical; GO:0046686 response to cadmium ion; GO:0050896 response to stimulus;	GO:0000502 proteasome complex; GO:0005622 intracellular; GO:0005623 cell; GO:0005737 cytoplasm; GO:0005773 vacuole; GO:0005829 cytosol; GO:0005839 proteasome core complex; GO:0005840 ribosome; GO:0019773 proteasome core complex, alpha-subunit complex; GO:0022626 cytosolic ribosome; GO:0032991 macromolecular complex; GO:0043226 organelle; GO:0043227 membrane-bounded organelle; GO:0043228 non-membr…		K02728	PSMA4; 20S proteasome subunit alpha 3 [EC:3.4.25.1]	osa03050 Proteasome - Oryza sativa japonica (Japanese rice) (RefSeq);	PF10584; PF00227	Proteasome subunit A N-terminal signature; Proteasome subunit	O	KOG0178	20S proteasome, regulatory subunit alpha type PSMA4/PRE9	F2CUY0	M0WZB5	0.446793
Cluster3	M0W5F2	Putative thiamine biosythesis protein ThiC(predicted) OS=Hordeum vulgare subsp. vulgare OX=112509 PE=3 SV=1	---	0.857	0.875	0.897	0.683	0.706	0.707	1.153	1.123	1.154	1.27	1.293	1.283	1.305	7.7641e-05	0.797	0.00019943	1.835	5.2447e-7	1.121	0.00037875	chloroplast	GO:0006725 cellular aromatic compound metabolic process; GO:0006766 vitamin metabolic process; GO:0006767 water-soluble vitamin metabolic process; GO:0006772 thiamine metabolic process; GO:0006790 sulfur compound metabolic process; GO:0006807 nitrogen compound metabolic process; GO:0007584 response to nutrient; GO:0008152 metabolic process; GO:0009058 biosynthetic process; GO:0009110 vitamin bios…	GO:0005622 intracellular; GO:0005623 cell; GO:0005737 cytoplasm; GO:0009507 chloroplast; GO:0009532 plastid stroma; GO:0009536 plastid; GO:0009570 chloroplast stroma; GO:0043226 organelle; GO:0043227 membrane-bounded organelle; GO:0043229 intracellular organelle; GO:0043231 intracellular membrane-bounded organelle; GO:0044422 organelle part; GO:0044424 intracellular part; GO:0044434 chloroplast p…	GO:0003824 catalytic activity; GO:0005488 binding; GO:0005515 protein binding; GO:0016462 pyrophosphatase activity; GO:0016787 hydrolase activity; GO:0016817 hydrolase activity, acting on acid anhydrides; GO:0016818 hydrolase activity, acting on acid anhydrides, in phosphorus-containing anhydrides; GO:0019144 ADP-sugar diphosphatase activity; GO:0019904 protein domain specific binding; GO:0048037…	K03147	thiC; phosphomethylpyrimidine synthase [EC:4.1.99.17]	osa00730 Thiamine metabolism - Oryza sativa japonica (Japanese rice) (RefSeq); osa01100 Metabolic pathways - Oryza sativa japonica (Japanese rice) (RefSeq);	PF01964	ThiC family				A0A287KTA5	M0W5F2	0.571636
Cluster3	M0VZB7	Lipase_GDSL domain-containing protein OS=Hordeum vulgare subsp. vulgare OX=112509 PE=4 SV=1	---	0.843	0.927	0.892	0.67	0.664	0.685	1.235	1.152	1.206	1.177	1.259	1.291	1.35	0.00094028	0.758	0.00069546	1.846	3.5095e-05	1.037	0.35028	extracellular												A0A287I8G7	M0VZB7	0.579917
Cluster3	M0UZP5	Cytochrome P450(predicted) OS=Hordeum vulgare subsp. vulgare OX=112509 PE=3 SV=1	---	0.742	0.846	1.111	0.488	0.574	0.475	1.643	1.381	1.507	0.867	1.252	1.112	1.679	0.0147631	0.569	0.0141583	2.102	0.0039813	0.713	0.043736	chloroplast							PF00067	Cytochrome P450	Q	KOG0156	Cytochrome P450 CYP2 subfamily	A0A287QII5	M0UZP5	0.370748
Cluster3	M0UZ78	20 kDa chaperonin, chloroplastic(predicted) OS=Hordeum vulgare subsp. vulgare OX=112509 PE=3 SV=1	---	0.87	0.878	0.903	0.776	0.837	0.794	0.963	0.944	0.969	1.353	1.342	1.371	1.085	0.003999	0.908	0.0179952	1.689	2.1416e-05	1.414	2.1148e-06	chloroplast	GO:0006457 protein folding; GO:0006458 'de novo' protein folding; GO:0006950 response to stress; GO:0006986 response to unfolded protein; GO:0009266 response to temperature stimulus; GO:0009409 response to cold; GO:0009628 response to abiotic stimulus; GO:0009787 regulation of abscisic acid-activated signaling pathway; GO:0009788 negative regulation of abscisic acid-activated signaling pathway; G…	GO:0005576 extracellular region; GO:0005622 intracellular; GO:0005623 cell; GO:0005737 cytoplasm; GO:0005739 mitochondrion; GO:0005759 mitochondrial matrix; GO:0009507 chloroplast; GO:0009526 plastid envelope; GO:0009532 plastid stroma; GO:0009534 chloroplast thylakoid; GO:0009535 chloroplast thylakoid membrane; GO:0009536 plastid; GO:0009570 chloroplast stroma; GO:0009579 thylakoid; GO:0009941 c…	GO:0005488 binding; GO:0005507 copper ion binding; GO:0005515 protein binding; GO:0043167 ion binding; GO:0043169 cation binding; GO:0046872 metal ion binding; GO:0046914 transition metal ion binding; GO:0051082 unfolded protein binding; GO:0051087 chaperone binding;	K04078	groES, HSPE1; chaperonin GroES		PF00166	Chaperonin 10 Kd subunit	O	KOG1641	Mitochondrial chaperonin	A0A287FYT4	M0UZ78	0.396873
Cluster3	F2E3F5	Predicted protein OS=Hordeum vulgare subsp. vulgare OX=112509 PE=2 SV=1	---	1.101	1.161	1.027	0.695	0.791	0.607	0.966	0.992	0.985	1.223	1.258	1.193	0.895	0.039084	0.636	0.0056244	1.755	0.00188136	1.248	0.00021594	nucleus	GO:0009987 cellular process; GO:0030154 cell differentiation; GO:0032502 developmental process; GO:0048468 cell development; GO:0048856 anatomical structure development; GO:0048863 stem cell differentiation; GO:0048864 stem cell development; GO:0048869 cellular developmental process;	GO:0005622 intracellular; GO:0005623 cell; GO:0005737 cytoplasm; GO:0005844 polysome; GO:0032991 macromolecular complex; GO:0044424 intracellular part; GO:0044464 cell part; GO:1990904 ribonucleoprotein complex;	GO:0003676 nucleic acid binding; GO:0003723 RNA binding; GO:0003727 single-stranded RNA binding; GO:0005488 binding; GO:0008187 poly-pyrimidine tract binding; GO:0008266 poly(U) RNA binding; GO:0097159 organic cyclic compound binding; GO:1901363 heterocyclic compound binding;	K14411	MSI; RNA-binding protein Musashi	osa03015 mRNA surveillance pathway - Oryza sativa japonica (Japanese rice) (RefSeq);	PF00076	RNA recognition motif. (a.k.a. RRM, RBD, or RNP domain)	A	KOG4205	RNA-binding protein musashi/mRNA cleavage and polyadenylation factor I complex, subunit HRP1	Q96565	F2E3F5	0.544823
Cluster3	F2E2F1	Predicted protein OS=Hordeum vulgare subsp. vulgare OX=112509 PE=2 SV=1	---	1.264	0.968	1.058	0.788	0.677	0.711	1.092	1.211	1.241	0.941	1.004	1.045	1.077	0.41812	0.661	0.0105623	1.374	0.0041615	0.844	0.027059	cytoplasm	GO:0006412 translation; GO:0006518 peptide metabolic process; GO:0006807 nitrogen compound metabolic process; GO:0008152 metabolic process; GO:0009058 biosynthetic process; GO:0009059 macromolecule biosynthetic process; GO:0009987 cellular process; GO:0010467 gene expression; GO:0019538 protein metabolic process; GO:0034641 cellular nitrogen compound metabolic process; GO:0034645 cellular macromo…	GO:0005622 intracellular; GO:0005623 cell; GO:0005737 cytoplasm; GO:0005829 cytosol; GO:0005840 ribosome; GO:0015934 large ribosomal subunit; GO:0022625 cytosolic large ribosomal subunit; GO:0022626 cytosolic ribosome; GO:0032991 macromolecular complex; GO:0043226 organelle; GO:0043228 non-membrane-bounded organelle; GO:0043229 intracellular organelle; GO:0043232 intracellular non-membrane-bounde…	GO:0003735 structural constituent of ribosome; GO:0005198 structural molecule activity;	K02889	RP-L21e, RPL21; large subunit ribosomal protein L21e	osa03010 Ribosome - Oryza sativa japonica (Japanese rice) (RefSeq);			J	KOG1732	60S ribosomal protein L21		F2E2F1	0.406557
Cluster3	F2DY57	Predicted protein OS=Hordeum vulgare subsp. vulgare OX=112509 PE=2 SV=1	---	0.742	0.871	0.832	0.589	0.446	0.602	1.027	1.306	1.17	1.454	1.501	1.461	1.433	0.0132824	0.67	0.0192952	2.698	0.0092625	1.261	0.077978	chloroplast	GO:0000902 cell morphogenesis; GO:0000904 cell morphogenesis involved in differentiation; GO:0009653 anatomical structure morphogenesis; GO:0009719 response to endogenous stimulus; GO:0009725 response to hormone; GO:0009735 response to cytokinin; GO:0009888 tissue development; GO:0009987 cellular process; GO:0010026 trichome differentiation; GO:0010033 response to organic substance; GO:0010090 tr…	GO:0005622 intracellular; GO:0005623 cell; GO:0005737 cytoplasm; GO:0009507 chloroplast; GO:0009532 plastid stroma; GO:0009536 plastid; GO:0009570 chloroplast stroma; GO:0043226 organelle; GO:0043227 membrane-bounded organelle; GO:0043229 intracellular organelle; GO:0043231 intracellular membrane-bounded organelle; GO:0044422 organelle part; GO:0044424 intracellular part; GO:0044434 chloroplast p…	GO:0003824 catalytic activity; GO:0004634 phosphopyruvate hydratase activity; GO:0016829 lyase activity; GO:0016835 carbon-oxygen lyase activity; GO:0016836 hydro-lyase activity;	K01689	ENO, eno; enolase [EC:4.2.1.11]	osa00010 Glycolysis / Gluconeogenesis - Oryza sativa japonica (Japanese rice) (RefSeq); osa01100 Metabolic pathways - Oryza sativa japonica (Japanese rice) (RefSeq); osa01110 Biosynthesis of secondary metabolites - Oryza sativa japonica (Japanese rice) (RefSeq); osa01200 Carbon metabolism - Oryza sativa japonica (Japanese rice) (RefSeq); osa01230 Biosynthesis of amino acids - Oryza sativa japonic…	PF03952; PF00113	Enolase, N-terminal domain; Enolase, C-terminal TIM barrel domain	G	KOG2670	Enolase	F2DI93	F2DY57	0.580521
Cluster3	F2DHV6	Predicted protein OS=Hordeum vulgare subsp. vulgare OX=112509 PE=2 SV=1	---	0.979	0.972	0.841	0.817	0.698	0.668	0.836	0.982	0.976	1.231	1.498	1.503	1.001	0.99584	0.782	0.034642	1.939	0.00182062	1.515	0.0080439	cytoplasm	GO:0007275 multicellular organism development; GO:0009888 tissue development; GO:0009893 positive regulation of metabolic process; GO:0009966 regulation of signal transduction; GO:0009968 negative regulation of signal transduction; GO:0010449 root meristem growth; GO:0010468 regulation of gene expression; GO:0010604 positive regulation of macromolecule metabolic process; GO:0010628 positive regul…	GO:0005622 intracellular; GO:0005623 cell; GO:0005634 nucleus; GO:0005737 cytoplasm; GO:0005829 cytosol; GO:0005886 plasma membrane; GO:0005911 cell-cell junction; GO:0009506 plasmodesma; GO:0016020 membrane; GO:0030054 cell junction; GO:0043226 organelle; GO:0043227 membrane-bounded organelle; GO:0043229 intracellular organelle; GO:0043231 intracellular membrane-bounded organelle; GO:0044424 int…					PF04969	CS domain	O	KOG3158	HSP90 co-chaperone p23	M0WAP6	F2DHV6	0.453882
Cluster3	F2DC44	Predicted protein OS=Hordeum vulgare subsp. vulgare OX=112509 PE=2 SV=1	---	1.201	1.263	0.863	0.662	0.319	0.674	0.789	1.114	1.055	1.051	1.829	1.178	0.889	0.5133	0.497	0.054038	2.452	0.036665	1.372	0.21092	chloroplast												A0A287GGY5	F2DC44	0.442893
Cluster3	F2D903	Xyloglucan endotransglucosylase/hydrolase OS=Hordeum vulgare subsp. vulgare OX=112509 PE=2 SV=1	---	1.021	0.673	0.876	0.706	0.577	0.497	1.19	1.284	0.917	1.371	1.431	1.458	1.319	0.150741	0.693	0.083879	2.393	0.00103522	1.256	0.08316	endoplasmic reticulum				K08235	E2.4.1.207; xyloglucan:xyloglucosyl transferase [EC:2.4.1.207]		PF00722	Glycosyl hydrolases family 16				A0A287XFT6	F2D903	0.50344
Cluster3	F2D6Q1	Chlorophyll a-b binding protein, chloroplastic OS=Hordeum vulgare subsp. vulgare OX=112509 PE=2 SV=1	---	1.148	1.188	1.172	0.636	0.696	0.653	1.083	1.072	1.09	1.098	1.113	1.051	0.925	0.0021589	0.566	3.8572e-05	1.643	9.9258e-05	1.005	0.79646	chloroplast				K08912	LHCB1; light-harvesting complex II chlorophyll a/b binding protein 1	osa00196 Photosynthesis - antenna proteins - Oryza sativa japonica (Japanese rice) (RefSeq); osa01100 Metabolic pathways - Oryza sativa japonica (Japanese rice) (RefSeq);						A0A287SWR5	F2D6Q1	0.522801
Cluster3	F2D5Z0	Predicted protein OS=Hordeum vulgare subsp. vulgare OX=112509 PE=2 SV=1	---	0.897	0.935	0.932	0.708	0.755	0.749	1.142	1.158	1.134	1.148	1.209	1.233	1.242	0.00012074	0.8	0.00077659	1.623	7.966e-05	1.045	0.118141	chloroplast				K08678	UXS1, uxs; UDP-glucuronate decarboxylase [EC:4.1.1.35]	osa00520 Amino sugar and nucleotide sugar metabolism - Oryza sativa japonica (Japanese rice) (RefSeq); osa01100 Metabolic pathways - Oryza sativa japonica (Japanese rice) (RefSeq);			GM	KOG1429	dTDP-glucose 4-6-dehydratase/UDP-glucuronic acid decarboxylase	A3FPG3	F2D5Z0	0.632042
Cluster3	F2D5L5	Predicted protein OS=Hordeum vulgare subsp. vulgare OX=112509 PE=2 SV=1	---	0.94	0.982	1.017	0.738	0.846	0.749	1.049	1.064	1.073	1.209	1.215	1.118	1.084	0.0267	0.794	0.0089635	1.518	0.00119862	1.112	0.0192044	cytoplasm				K18883	ROMT; tricin synthase [EC:2.1.1.175]		PF01596	O-methyltransferase	Q	KOG1663	O-methyltransferase	F2CPM8	F2D5L5	0.642668
Cluster3	F2D4L0	Predicted protein OS=Hordeum vulgare subsp. vulgare OX=112509 PE=2 SV=1	---	1.012	0.94	0.953	0.742	0.71	0.869	1.108	1.055	1.074	1.168	1.147	1.221	1.114	0.0154996	0.799	0.025299	1.523	0.0026981	1.092	0.0197567	chloroplast	GO:0001101 response to acid chemical; GO:0002239 response to oomycetes; GO:0002376 immune system process; GO:0006518 peptide metabolic process; GO:0006575 cellular modified amino acid metabolic process; GO:0006749 glutathione metabolic process; GO:0006790 sulfur compound metabolic process; GO:0006807 nitrogen compound metabolic process; GO:0006950 response to stress; GO:0006952 defense response; …	GO:0005576 extracellular region; GO:0005618 cell wall; GO:0005622 intracellular; GO:0005623 cell; GO:0005634 nucleus; GO:0005737 cytoplasm; GO:0005739 mitochondrion; GO:0005773 vacuole; GO:0005774 vacuolar membrane; GO:0005829 cytosol; GO:0005886 plasma membrane; GO:0005911 cell-cell junction; GO:0009506 plasmodesma; GO:0009507 chloroplast; GO:0009526 plastid envelope; GO:0009532 plastid stroma; …	GO:0003824 catalytic activity; GO:0004364 glutathione transferase activity; GO:0005488 binding; GO:0005507 copper ion binding; GO:0005515 protein binding; GO:0008144 drug binding; GO:0016740 transferase activity; GO:0016765 transferase activity, transferring alkyl or aryl (other than methyl) groups; GO:0019904 protein domain specific binding; GO:0033218 amide binding; GO:0042277 peptide binding; …	K00799	GST, gst; glutathione S-transferase [EC:2.5.1.18]	osa00480 Glutathione metabolism - Oryza sativa japonica (Japanese rice) (RefSeq); osa01100 Metabolic pathways - Oryza sativa japonica (Japanese rice) (RefSeq);	PF02798; PF00043	Glutathione S-transferase, N-terminal domain; Glutathione S-transferase, C-terminal domain	O	KOG0867	Glutathione S-transferase	F2DER3	F2D4L0	0.647673
Cluster3	F2D4I4	Delta-aminolevulinic acid dehydratase OS=Hordeum vulgare subsp. vulgare OX=112509 PE=2 SV=1	---	0.914	0.936	0.929	0.717	0.745	0.684	1.048	1.049	1.07	1.32	1.286	1.303	1.14	0.000179701	0.772	0.00054177	1.822	2.0158e-05	1.234	3.5844e-05	chloroplast	GO:0006725 cellular aromatic compound metabolic process; GO:0006778 porphyrin-containing compound metabolic process; GO:0006779 porphyrin-containing compound biosynthetic process; GO:0006783 heme biosynthetic process; GO:0006807 nitrogen compound metabolic process; GO:0008152 metabolic process; GO:0009058 biosynthetic process; GO:0009987 cellular process; GO:0018130 heterocycle biosynthetic proce…	GO:0005622 intracellular; GO:0005623 cell; GO:0005737 cytoplasm; GO:0005829 cytosol; GO:0009507 chloroplast; GO:0009532 plastid stroma; GO:0009536 plastid; GO:0009570 chloroplast stroma; GO:0043226 organelle; GO:0043227 membrane-bounded organelle; GO:0043229 intracellular organelle; GO:0043231 intracellular membrane-bounded organelle; GO:0044422 organelle part; GO:0044424 intracellular part; GO:0…	GO:0003824 catalytic activity; GO:0004655 porphobilinogen synthase activity; GO:0005488 binding; GO:0008270 zinc ion binding; GO:0016829 lyase activity; GO:0016835 carbon-oxygen lyase activity; GO:0016836 hydro-lyase activity; GO:0043167 ion binding; GO:0043169 cation binding; GO:0046872 metal ion binding; GO:0046914 transition metal ion binding;	K01698	hemB, ALAD; porphobilinogen synthase [EC:4.2.1.24]	osa00860 Porphyrin and chlorophyll metabolism - Oryza sativa japonica (Japanese rice) (RefSeq); osa01100 Metabolic pathways - Oryza sativa japonica (Japanese rice) (RefSeq); osa01110 Biosynthesis of secondary metabolites - Oryza sativa japonica (Japanese rice) (RefSeq);	PF00490	Delta-aminolevulinic acid dehydratase	H	KOG2794	Delta-aminolevulinic acid dehydratase	M0X0A5	F2D4I4	0.662116
Cluster3	F2D0U3	Predicted protein OS=Hordeum vulgare subsp. vulgare OX=112509 PE=2 SV=1	---	0.783	1.018	1.049	0.451	0.19	0.487	1.414	1.37	1.542	1.13	1.269	1.297	1.518	0.0129441	0.396	0.034036	3.277	0.053383	0.854	0.04658	cytoplasm				K02958	RP-S15e, RPS15; small subunit ribosomal protein S15e	osa03010 Ribosome - Oryza sativa japonica (Japanese rice) (RefSeq);	PF00203	Ribosomal protein S19	J	KOG0898	40S ribosomal protein S15	A0A287L4T1	F2D0U3	0.511166
Cluster3	F2CUU6	Predicted protein OS=Hordeum vulgare subsp. vulgare OX=112509 PE=2 SV=1	---	1.353	1.208	1.114	0.532	0.586	0.581	1.036	1.077	1.065	1.168	1.01	1.269	0.865	0.06878	0.462	0.00027969	2.029	0.0006623	1.085	0.319	plasma membrane												A0A287K2P3	F2CUU6	0.521842
Cluster3	F2CQ53	Predicted protein OS=Hordeum vulgare subsp. vulgare OX=112509 PE=2 SV=1	---	0.818	0.824	0.816	0.666	0.621	0.612	1.11	1.105	1.188	1.416	1.432	1.393	1.384	0.0052414	0.773	0.0101434	2.233	3.955e-06	1.246	0.00087835	chloroplast	GO:0006091 generation of precursor metabolites and energy; GO:0006725 cellular aromatic compound metabolic process; GO:0006807 nitrogen compound metabolic process; GO:0007275 multicellular organism development; GO:0008152 metabolic process; GO:0009058 biosynthetic process; GO:0009767 photosynthetic electron transport chain; GO:0009791 post-embryonic development; GO:0009889 regulation of biosynthe…	GO:0005622 intracellular; GO:0005623 cell; GO:0005737 cytoplasm; GO:0009507 chloroplast; GO:0009532 plastid stroma; GO:0009534 chloroplast thylakoid; GO:0009536 plastid; GO:0009570 chloroplast stroma; GO:0009579 thylakoid; GO:0031976 plastid thylakoid; GO:0031984 organelle subcompartment; GO:0043226 organelle; GO:0043227 membrane-bounded organelle; GO:0043229 intracellular organelle; GO:0043231 i…	GO:0005488 binding; GO:0005515 protein binding; GO:0043495 protein anchor;									M0VYV1	F2CQ53	0.523263
Cluster3	A0A287XIA8	Inositol polyphosphate multikinase OS=Hordeum vulgare subsp. vulgare OX=112509 PE=3 SV=1	---	0.984	0.899	0.855	0.874	0.563	0.788	1.181	1.101	1.172	1.151	1.292	1.14	1.262	0.0075036	0.813	0.184278	1.61	0.0239	1.037	0.48262	cytoplasm	GO:0000003 reproduction; GO:0000902 cell morphogenesis; GO:0000904 cell morphogenesis involved in differentiation; GO:0003006 developmental process involved in reproduction; GO:0006066 alcohol metabolic process; GO:0006355 regulation of transcription, DNA-templated; GO:0006793 phosphorus metabolic process; GO:0006796 phosphate-containing compound metabolic process; GO:0006935 chemotaxis; GO:00072…	GO:0005622 intracellular; GO:0005623 cell; GO:0005634 nucleus; GO:0005737 cytoplasm; GO:0005829 cytosol; GO:0005886 plasma membrane; GO:0016020 membrane; GO:0042995 cell projection; GO:0043226 organelle; GO:0043227 membrane-bounded organelle; GO:0043229 intracellular organelle; GO:0043231 intracellular membrane-bounded organelle; GO:0044424 intracellular part; GO:0044444 cytoplasmic part; GO:0044…	GO:0000823 inositol-1,4,5-trisphosphate 6-kinase activity; GO:0000824 inositol tetrakisphosphate 3-kinase activity; GO:0003824 catalytic activity; GO:0016301 kinase activity; GO:0016740 transferase activity; GO:0016772 transferase activity, transferring phosphorus-containing groups; GO:0016773 phosphotransferase activity, alcohol group as acceptor; GO:0051765 inositol tetrakisphosphate kinase act…	K00915	IPMK, IPK2; inositol-polyphosphate multikinase [EC:2.7.1.140 2.7.1.151]	osa00562 Inositol phosphate metabolism - Oryza sativa japonica (Japanese rice) (RefSeq); osa01100 Metabolic pathways - Oryza sativa japonica (Japanese rice) (RefSeq); osa04070 Phosphatidylinositol signaling system - Oryza sativa japonica (Japanese rice) (RefSeq);			IKT	KOG1620	Inositol polyphosphate multikinase, component of the ARGR transcription regulatory complex	A0A287LHF7	A0A287XIA8	0.425866
Cluster3	A0A287XF12	Prephenate/arogenate dehydrogenase domain-containing protein OS=Hordeum vulgare subsp. vulgare OX=112509 PE=4 SV=1	---	0.973	0.94	0.911	0.691	0.702	0.593	1.105	1.16	1.225	1.265	1.116	1.319	1.236	0.003937	0.703	0.0034186	1.863	0.00107507	1.06	0.38544	chloroplast				K15227	TYRAAT; arogenate dehydrogenase (NADP+), plant [EC:1.3.1.78]	osa00400 Phenylalanine, tyrosine and tryptophan biosynthesis - Oryza sativa japonica (Japanese rice) (RefSeq); osa01100 Metabolic pathways - Oryza sativa japonica (Japanese rice) (RefSeq); osa01110 Biosynthesis of secondary metabolites - Oryza sativa japonica (Japanese rice) (RefSeq); osa01230 Biosynthesis of amino acids - Oryza sativa japonica (Japanese rice) (RefSeq);			E	KOG2380	Prephenate dehydrogenase (NADP+)	M0YNH1	A0A287XF12	0.649297
Cluster3	A0A287XA16	AAA domain-containing protein OS=Hordeum vulgare subsp. vulgare OX=112509 PE=3 SV=1	---	0.963	0.931	0.947	0.688	0.659	0.757	1.294	1.077	1.042	1.236	1.235	1.171	1.201	0.1194	0.741	0.0020021	1.731	0.00025523	1.067	0.3767	cytoplasm				K03064	PSMC6, RPT4; 26S proteasome regulatory subunit T4	osa03050 Proteasome - Oryza sativa japonica (Japanese rice) (RefSeq);	PF00004	ATPase family associated with various cellular activities (AAA)	O	KOG0651	26S proteasome regulatory complex, ATPase RPT4	A0A287V521	A0A287XA16	0.658613
Cluster3	A0A287X9F8	Thiamine thiazole synthase, chloroplastic(predicted) OS=Hordeum vulgare subsp. vulgare OX=112509 PE=4 SV=1	---	0.905	0.885	0.913	0.797	0.827	0.823	0.988	1.006	1.017	1.264	1.263	1.312	1.114	0.00100008	0.905	0.0025766	1.569	1.6165e-05	1.275	8.4034e-05	cytoplasm	GO:0006725 cellular aromatic compound metabolic process; GO:0006766 vitamin metabolic process; GO:0006767 water-soluble vitamin metabolic process; GO:0006772 thiamine metabolic process; GO:0006790 sulfur compound metabolic process; GO:0006807 nitrogen compound metabolic process; GO:0008152 metabolic process; GO:0009058 biosynthetic process; GO:0009110 vitamin biosynthetic process; GO:0009228 thia…	GO:0005622 intracellular; GO:0005623 cell; GO:0005737 cytoplasm; GO:0005829 cytosol; GO:0044424 intracellular part; GO:0044444 cytoplasmic part; GO:0044464 cell part;	GO:0005488 binding; GO:0005506 iron ion binding; GO:0043167 ion binding; GO:0043169 cation binding; GO:0046872 metal ion binding; GO:0046914 transition metal ion binding;	K03146	THI4, THI1; thiamine thiazole synthase	osa00730 Thiamine metabolism - Oryza sativa japonica (Japanese rice) (RefSeq); osa01100 Metabolic pathways - Oryza sativa japonica (Japanese rice) (RefSeq);			H	KOG2960	Protein involved in thiamine biosynthesis and DNA damage tolerance	A0A287VLT4	A0A287X9F8	0.433338
Cluster3	A0A287X4W3	Cytochrome P450 93A3(predicted) OS=Hordeum vulgare subsp. vulgare OX=112509 PE=3 SV=1	---	0.784	0.64	0.813	0.542	0.526	0.384	1.404	1.496	1.374	1.298	1.34	1.4	1.911	0.0011588	0.649	0.030024	2.781	0.00077756	0.945	0.167741	chloroplast	GO:0008152 metabolic process; GO:0009058 biosynthetic process; GO:0019748 secondary metabolic process; GO:0044550 secondary metabolite biosynthetic process; GO:0055114 oxidation-reduction process;	GO:0016020 membrane;	GO:0003824 catalytic activity; GO:0004497 monooxygenase activity; GO:0016491 oxidoreductase activity; GO:0016705 oxidoreductase activity, acting on paired donors, with incorporation or reduction of molecular oxygen; GO:0016709 oxidoreductase activity, acting on paired donors, with incorporation or reduction of molecular oxygen, NAD(P)H as one donor, and incorporation of one atom of oxygen;	K23135			PF00067	Cytochrome P450	Q	KOG0156	Cytochrome P450 CYP2 subfamily	M0YB36	A0A287X4W3	0.392054
Cluster3	A0A287X3H7	Glycosyltransferase(predicted) OS=Hordeum vulgare subsp. vulgare OX=112509 PE=4 SV=1	---	1.273	1.077	1.143	0.794	0.878	0.639	1.04	1.078	1.039	0.963	1.084	0.994	0.904	0.121361	0.662	0.0166179	1.316	0.048185	0.963	0.36086	chloroplast									CG	KOG1192	UDP-glucuronosyl and UDP-glucosyl transferase		A0A287X3H7	0.364906
Cluster3	A0A287WVA3	Multiple organellar RNA editing factor 9, chloroplastic-like(predicted) OS=Hordeum vulgare subsp. vulgare OX=112509 PE=4 SV=1	---	1.067	1.171	1.005	0.617	0.502	0.515	1.113	1.083	1.013	1.364	1.284	1.266	0.99	0.86768	0.504	0.00094209	2.395	0.00021912	1.22	0.0053152	chloroplast	GO:0006139 nucleobase-containing compound metabolic process; GO:0006725 cellular aromatic compound metabolic process; GO:0006807 nitrogen compound metabolic process; GO:0008152 metabolic process; GO:0009451 RNA modification; GO:0009987 cellular process; GO:0016070 RNA metabolic process; GO:0034641 cellular nitrogen compound metabolic process; GO:0043170 macromolecule metabolic process; GO:0043412…	GO:0005622 intracellular; GO:0005623 cell; GO:0005737 cytoplasm; GO:0009507 chloroplast; GO:0009526 plastid envelope; GO:0009532 plastid stroma; GO:0009536 plastid; GO:0009570 chloroplast stroma; GO:0009941 chloroplast envelope; GO:0031967 organelle envelope; GO:0031975 envelope; GO:0043226 organelle; GO:0043227 membrane-bounded organelle; GO:0043229 intracellular organelle; GO:0043231 intracellu…										A0A287EGT4	A0A287WVA3	0.679299
Cluster3	A0A287WP26	RNA-binding Ras-GAP SH3 binding protein(predicted) OS=Hordeum vulgare subsp. vulgare OX=112509 PE=4 SV=1	---	0.912	0.982	0.881	0.727	0.903	0.704	1.059	1.064	0.954	1.295	1.29	1.229	1.109	0.097699	0.841	0.102436	1.634	0.0034048	1.24	0.0054172	nucleus							PF02136; PF00076	Nuclear transport factor 2 (NTF2) domain; RNA recognition motif. (a.k.a. RRM, RBD, or RNP domain)	A	KOG0116	RasGAP SH3 binding protein rasputin, contains NTF2 and RRM domains	A0A287WPW9	A0A287WP26	0.470327
Cluster3	A0A287WMG4	7,8-dihydroneopterin aldolase OS=Hordeum vulgare subsp. vulgare OX=112509 PE=3 SV=1	---	1.288	1.232	1.041	0.841	0.67	0.807	1.058	0.893	0.968	1.037	1.042	1.122	0.82	0.072339	0.651	0.0107428	1.381	0.0117599	1.097	0.163941	cytoplasm		GO:0005622 intracellular; GO:0005623 cell; GO:0005737 cytoplasm; GO:0005829 cytosol; GO:0044424 intracellular part; GO:0044444 cytoplasmic part; GO:0044464 cell part;	GO:0003824 catalytic activity; GO:0004150 dihydroneopterin aldolase activity; GO:0016829 lyase activity; GO:0016830 carbon-carbon lyase activity; GO:0016832 aldehyde-lyase activity;	K01633	folB; 7,8-dihydroneopterin aldolase/epimerase/oxygenase [EC:4.1.2.25 5.1.99.8 1.13.11.81]	osa00790 Folate biosynthesis - Oryza sativa japonica (Japanese rice) (RefSeq); osa01100 Metabolic pathways - Oryza sativa japonica (Japanese rice) (RefSeq);	PF02152	Dihydroneopterin aldolase					A0A287WMG4	0.369769
Cluster3	A0A287V6Y4	rRNA 2'-O-methyltransferase fibrillarin 1(predicted) OS=Hordeum vulgare subsp. vulgare OX=112509 PE=3 SV=1	---	0.917	1.011	1.065	0.388	0.647	0.596	1.409	1.285	1.235	1.18	1.13	1.139	1.313	0.0097242	0.545	0.0187199	2.115	0.039898	0.878	0.035319	cytoplasm	GO:0000154 rRNA modification; GO:0000494 box C/D snoRNA 3'-end processing; GO:0001510 RNA methylation; GO:0006139 nucleobase-containing compound metabolic process; GO:0006325 chromatin organization; GO:0006364 rRNA processing; GO:0006396 RNA processing; GO:0006464 cellular protein modification process; GO:0006479 protein methylation; GO:0006725 cellular aromatic compound metabolic process; GO:000…	GO:0005622 intracellular; GO:0005623 cell; GO:0005634 nucleus; GO:0005654 nucleoplasm; GO:0005730 nucleolus; GO:0005732 small nucleolar ribonucleoprotein complex; GO:0015030 Cajal body; GO:0016020 membrane; GO:0016592 mediator complex; GO:0016604 nuclear body; GO:0030684 preribosome; GO:0031428 box C/D snoRNP complex; GO:0031974 membrane-enclosed lumen; GO:0031981 nuclear lumen; GO:0032040 small-…	GO:0003676 nucleic acid binding; GO:0003723 RNA binding; GO:0003824 catalytic activity; GO:0004518 nuclease activity; GO:0004540 ribonuclease activity; GO:0005488 binding; GO:0008168 methyltransferase activity; GO:0008170 N-methyltransferase activity; GO:0008173 RNA methyltransferase activity; GO:0008276 protein methyltransferase activity; GO:0008649 rRNA methyltransferase activity; GO:0008757 S-…	K14563	NOP1, FBL; rRNA 2'-O-methyltransferase fibrillarin [EC:2.1.1.-]	osa03008 Ribosome biogenesis in eukaryotes - Oryza sativa japonica (Japanese rice) (RefSeq);	PF01269	Fibrillarin	J	KOG1596	Fibrillarin and related nucleolar RNA-binding proteins	F2DC29	A0A287V6Y4	0.503149
Cluster3	A0A287UMN5	Acetolactate synthase OS=Hordeum vulgare subsp. vulgare OX=112509 PE=3 SV=1	---	0.858	0.863	0.859	0.753	0.721	0.73	1.07	1.037	1.036	1.352	1.365	1.356	1.218	5.5975e-05	0.854	0.0067627	1.848	6.4172e-7	1.296	1.95215e-05	chloroplast	GO:0006082 organic acid metabolic process; GO:0006520 cellular amino acid metabolic process; GO:0006573 valine metabolic process; GO:0006807 nitrogen compound metabolic process; GO:0008152 metabolic process; GO:0008652 cellular amino acid biosynthetic process; GO:0009058 biosynthetic process; GO:0009081 branched-chain amino acid metabolic process; GO:0009082 branched-chain amino acid biosynthetic…	GO:0005622 intracellular; GO:0005623 cell; GO:0005737 cytoplasm; GO:0009507 chloroplast; GO:0009532 plastid stroma; GO:0009536 plastid; GO:0009570 chloroplast stroma; GO:0043226 organelle; GO:0043227 membrane-bounded organelle; GO:0043229 intracellular organelle; GO:0043231 intracellular membrane-bounded organelle; GO:0044422 organelle part; GO:0044424 intracellular part; GO:0044434 chloroplast p…	GO:0003824 catalytic activity; GO:0003984 acetolactate synthase activity; GO:0016740 transferase activity; GO:0016744 transferase activity, transferring aldehyde or ketonic groups;	K01652	E2.2.1.6L, ilvB, ilvG, ilvI; acetolactate synthase I/II/III large subunit [EC:2.2.1.6]	osa00290 Valine, leucine and isoleucine biosynthesis - Oryza sativa japonica (Japanese rice) (RefSeq); osa00650 Butanoate metabolism - Oryza sativa japonica (Japanese rice) (RefSeq); osa00660 C5-Branched dibasic acid metabolism - Oryza sativa japonica (Japanese rice) (RefSeq); osa00770 Pantothenate and CoA biosynthesis - Oryza sativa japonica (Japanese rice) (RefSeq); osa01100 Metabolic pathways …	PF02776; PF00205; PF02775	Thiamine pyrophosphate enzyme, N-terminal TPP binding domain; Thiamine pyrophosphate enzyme, central domain; Thiamine pyrophosphate enzyme, C-terminal TPP binding domain	EH	KOG4166	Thiamine pyrophosphate-requiring enzyme	A0A287RSR4	A0A287UMN5	0.473089
Cluster3	A0A287ULK9	Peptidase A1 domain-containing protein OS=Hordeum vulgare subsp. vulgare OX=112509 PE=3 SV=1	---	1.466	1.333	1.337	0.64	0.645	0.675	1.182	1.075	1.078	0.81	0.885	0.873	0.806	0.0081625	0.474	2.4906e-05	1.31	0.00110208	0.77	0.0032828	chloroplast									O	KOG1339	Aspartyl protease		A0A287ULK9	0.285288
Cluster3	A0A287UK92	Aminotran_1_2 domain-containing protein OS=Hordeum vulgare subsp. vulgare OX=112509 PE=3 SV=1	---	0.96	1.017	1.059	0.704	0.7	0.812	1.134	1.219	1.067	1.072	1.133	1.122	1.126	0.068702	0.73	0.0049215	1.501	0.00136194	0.973	0.565	chloroplast	GO:0000105 histidine biosynthetic process; GO:0006082 organic acid metabolic process; GO:0006520 cellular amino acid metabolic process; GO:0006547 histidine metabolic process; GO:0006725 cellular aromatic compound metabolic process; GO:0006807 nitrogen compound metabolic process; GO:0008152 metabolic process; GO:0008652 cellular amino acid biosynthetic process; GO:0009058 biosynthetic process; GO…	GO:0005622 intracellular; GO:0005623 cell; GO:0005737 cytoplasm; GO:0009507 chloroplast; GO:0009532 plastid stroma; GO:0009536 plastid; GO:0009570 chloroplast stroma; GO:0043226 organelle; GO:0043227 membrane-bounded organelle; GO:0043229 intracellular organelle; GO:0043231 intracellular membrane-bounded organelle; GO:0044422 organelle part; GO:0044424 intracellular part; GO:0044434 chloroplast p…	GO:0003824 catalytic activity; GO:0004400 histidinol-phosphate transaminase activity; GO:0008483 transaminase activity; GO:0016740 transferase activity; GO:0016769 transferase activity, transferring nitrogenous groups;	K00817	hisC; histidinol-phosphate aminotransferase [EC:2.6.1.9]	osa00340 Histidine metabolism - Oryza sativa japonica (Japanese rice) (RefSeq); osa00350 Tyrosine metabolism - Oryza sativa japonica (Japanese rice) (RefSeq); osa00360 Phenylalanine metabolism - Oryza sativa japonica (Japanese rice) (RefSeq); osa00400 Phenylalanine, tyrosine and tryptophan biosynthesis - Oryza sativa japonica (Japanese rice) (RefSeq); osa00960 Tropane, piperidine and pyridine alk…	PF00155	Aminotransferase class I and II	E	KOG0633	Histidinol phosphate aminotransferase	M0Y3W8	A0A287UK92	0.596884
Cluster3	A0A287UGR8	RmlD_sub_bind domain-containing protein OS=Hordeum vulgare subsp. vulgare OX=112509 PE=4 SV=1	---	0.981	0.859	1.01	0.772	0.691	0.775	1.108	1.143	1.254	1.073	1.213	1.121	1.23	0.028724	0.785	0.0182236	1.522	0.00127544	0.972	0.61352	nucleus	GO:0006139 nucleobase-containing compound metabolic process; GO:0006725 cellular aromatic compound metabolic process; GO:0006793 phosphorus metabolic process; GO:0006807 nitrogen compound metabolic process; GO:0006810 transport; GO:0008152 metabolic process; GO:0009058 biosynthetic process; GO:0009225 nucleotide-sugar metabolic process; GO:0009226 nucleotide-sugar biosynthetic process; GO:0009812…	GO:0005622 intracellular; GO:0005623 cell; GO:0005737 cytoplasm; GO:0005829 cytosol; GO:0005911 cell-cell junction; GO:0009506 plasmodesma; GO:0030054 cell junction; GO:0044424 intracellular part; GO:0044444 cytoplasmic part; GO:0044464 cell part; GO:0055044 symplast;	GO:0003824 catalytic activity; GO:0010280 UDP-L-rhamnose synthase activity; GO:0016829 lyase activity; GO:0016835 carbon-oxygen lyase activity; GO:0016836 hydro-lyase activity; GO:0050377 UDP-glucose 4,6-dehydratase activity;	K12451	UER1; 3,5-epimerase/4-reductase [EC:5.1.3.- 1.1.1.-]	osa00520 Amino sugar and nucleotide sugar metabolism - Oryza sativa japonica (Japanese rice) (RefSeq); osa01100 Metabolic pathways - Oryza sativa japonica (Japanese rice) (RefSeq);	PF04321	RmlD substrate binding domain	G	KOG0747	Putative NAD+-dependent epimerases	A0A287MWM4	A0A287UGR8	0.504646
Cluster3	A0A287UBI8	Phenylalanine ammonia-lyase OS=Hordeum vulgare subsp. vulgare OX=112509 PE=3 SV=1	---	1.234	1.279	1.286	0.677	0.697	0.69	0.96	0.958	0.983	1.069	1.102	1.065	0.764	6.0917e-05	0.543	1.2471e-06	1.568	2.6268e-06	1.115	0.0013035	endoplasmic reticulum	GO:0001101 response to acid chemical; GO:0006082 organic acid metabolic process; GO:0006464 cellular protein modification process; GO:0006508 proteolysis; GO:0006511 ubiquitin-dependent protein catabolic process; GO:0006725 cellular aromatic compound metabolic process; GO:0006807 nitrogen compound metabolic process; GO:0006950 response to stress; GO:0006979 response to oxidative stress; GO:000727…	GO:0005622 intracellular; GO:0005623 cell; GO:0005737 cytoplasm; GO:0005829 cytosol; GO:0032991 macromolecular complex; GO:0044424 intracellular part; GO:0044444 cytoplasmic part; GO:0044464 cell part;	GO:0003824 catalytic activity; GO:0016829 lyase activity; GO:0016840 carbon-nitrogen lyase activity; GO:0016841 ammonia-lyase activity; GO:0045548 phenylalanine ammonia-lyase activity;						Q	KOG0222	Phenylalanine and histidine ammonia-lyase	A0A287UZC3	A0A287UBI8	0.403986
Cluster3	A0A287U8Y6	Acetolactate synthase small subunit(predicted) OS=Hordeum vulgare subsp. vulgare OX=112509 PE=4 SV=1	---	0.772	0.812	0.77	0.489	0.521	0.598	1.132	1.137	1.295	1.468	1.498	1.507	1.514	0.00095701	0.683	0.0034172	2.782	0.0033952	1.255	0.0069375	chloroplast	GO:0006082 organic acid metabolic process; GO:0006520 cellular amino acid metabolic process; GO:0006549 isoleucine metabolic process; GO:0006551 leucine metabolic process; GO:0006573 valine metabolic process; GO:0006807 nitrogen compound metabolic process; GO:0008152 metabolic process; GO:0008652 cellular amino acid biosynthetic process; GO:0009058 biosynthetic process; GO:0009081 branched-chain …	GO:0005622 intracellular; GO:0005623 cell; GO:0005737 cytoplasm; GO:0005777 peroxisome; GO:0005829 cytosol; GO:0005948 acetolactate synthase complex; GO:0009507 chloroplast; GO:0009536 plastid; GO:0032991 macromolecular complex; GO:0042579 microbody; GO:0043226 organelle; GO:0043227 membrane-bounded organelle; GO:0043229 intracellular organelle; GO:0043231 intracellular membrane-bounded organelle…	GO:0003824 catalytic activity; GO:0003984 acetolactate synthase activity; GO:0005488 binding; GO:0005515 protein binding; GO:0016740 transferase activity; GO:0016744 transferase activity, transferring aldehyde or ketonic groups; GO:0043621 protein self-association;	K01653	E2.2.1.6S, ilvH, ilvN; acetolactate synthase I/III small subunit [EC:2.2.1.6]	osa00290 Valine, leucine and isoleucine biosynthesis - Oryza sativa japonica (Japanese rice) (RefSeq); osa00650 Butanoate metabolism - Oryza sativa japonica (Japanese rice) (RefSeq); osa00660 C5-Branched dibasic acid metabolism - Oryza sativa japonica (Japanese rice) (RefSeq); osa00770 Pantothenate and CoA biosynthesis - Oryza sativa japonica (Japanese rice) (RefSeq); osa01100 Metabolic pathways …	PF13710	ACT domain	E	KOG2663	Acetolactate synthase, small subunit	A0A287K0E0	A0A287U8Y6	0.573039
Cluster3	A0A287U537	ATP synthase subunit beta, chloroplastic OS=Hordeum vulgare subsp. vulgare OX=112509 GN=4525186 PE=3 SV=1	4525186	1.207	1.485	1.199	0.824	0.657	0.668	0.712	0.979	0.912	1.086	1.114	1.157	0.669	0.027243	0.552	0.0042041	1.562	0.0038796	1.29	0.055379	cytoplasm	GO:0002376 immune system process; GO:0006950 response to stress; GO:0006952 defense response; GO:0006955 immune response; GO:0009266 response to temperature stimulus; GO:0009409 response to cold; GO:0009605 response to external stimulus; GO:0009607 response to biotic stimulus; GO:0009620 response to fungus; GO:0009628 response to abiotic stimulus; GO:0009814 defense response, incompatible interac…	GO:0005618 cell wall; GO:0005622 intracellular; GO:0005623 cell; GO:0005737 cytoplasm; GO:0009507 chloroplast; GO:0009526 plastid envelope; GO:0009532 plastid stroma; GO:0009534 chloroplast thylakoid; GO:0009535 chloroplast thylakoid membrane; GO:0009536 plastid; GO:0009544 chloroplast ATP synthase complex; GO:0009570 chloroplast stroma; GO:0009579 thylakoid; GO:0010287 plastoglobule; GO:0010319 …	GO:0005488 binding; GO:0008270 zinc ion binding; GO:0043167 ion binding; GO:0043169 cation binding; GO:0046872 metal ion binding; GO:0046914 transition metal ion binding;	K02112	ATPF1B, atpD; F-type H+-transporting ATPase subunit beta [EC:3.6.3.14]	osa00190 Oxidative phosphorylation - Oryza sativa japonica (Japanese rice) (RefSeq); osa00195 Photosynthesis - Oryza sativa japonica (Japanese rice) (RefSeq); osa01100 Metabolic pathways - Oryza sativa japonica (Japanese rice) (RefSeq);	PF00006; PF02823; PF00401	ATP synthase alpha/beta family, nucleotide-binding domain; ATP synthase, Delta/Epsilon chain, beta-sandwich domain; ATP synthase, Delta/Epsilon chain, long alpha-helix domain	C	KOG1758	Mitochondrial F1F0-ATP synthase, subunit delta/ATP16	A0A287RTG3	A0A287U537	0.314057
Cluster3	A0A287TTF0	Glyceraldehyde-3-phosphate dehydrogenase OS=Hordeum vulgare subsp. vulgare OX=112509 PE=3 SV=1	---	0.836	0.773	0.858	0.671	0.692	0.567	1.114	1.112	1.103	1.562	1.557	1.154	1.349	0.0108018	0.782	0.023223	2.214	0.0025993	1.284	0.139459	chloroplast	GO:0000003 reproduction; GO:0003006 developmental process involved in reproduction; GO:0005975 carbohydrate metabolic process; GO:0007275 multicellular organism development; GO:0008152 metabolic process; GO:0009555 pollen development; GO:0009719 response to endogenous stimulus; GO:0009725 response to hormone; GO:0009735 response to cytokinin; GO:0009791 post-embryonic development; GO:0009908 flow…	GO:0005622 intracellular; GO:0005623 cell; GO:0005737 cytoplasm; GO:0009536 plastid; GO:0016020 membrane; GO:0043226 organelle; GO:0043227 membrane-bounded organelle; GO:0043229 intracellular organelle; GO:0043231 intracellular membrane-bounded organelle; GO:0044424 intracellular part; GO:0044444 cytoplasmic part; GO:0044464 cell part;	GO:0003824 catalytic activity; GO:0004365 glyceraldehyde-3-phosphate dehydrogenase (NAD+) (phosphorylating) activity; GO:0005488 binding; GO:0005507 copper ion binding; GO:0008270 zinc ion binding; GO:0016491 oxidoreductase activity; GO:0016620 oxidoreductase activity, acting on the aldehyde or oxo group of donors, NAD or NADP as acceptor; GO:0016903 oxidoreductase activity, acting on the aldehyd…	K00134	GAPDH, gapA; glyceraldehyde 3-phosphate dehydrogenase [EC:1.2.1.12]	osa00010 Glycolysis / Gluconeogenesis - Oryza sativa japonica (Japanese rice) (RefSeq); osa00710 Carbon fixation in photosynthetic organisms - Oryza sativa japonica (Japanese rice) (RefSeq); osa01100 Metabolic pathways - Oryza sativa japonica (Japanese rice) (RefSeq); osa01110 Biosynthesis of secondary metabolites - Oryza sativa japonica (Japanese rice) (RefSeq); osa01200 Carbon metabolism - Oryz…	PF00044; PF02800	Glyceraldehyde 3-phosphate dehydrogenase, NAD binding domain; Glyceraldehyde 3-phosphate dehydrogenase, C-terminal domain	G	KOG0657	Glyceraldehyde 3-phosphate dehydrogenase	F2CSC9	A0A287TTF0	0.451743
Cluster3	A0A287THW9	Delta-aminolevulinic acid dehydratase OS=Hordeum vulgare subsp. vulgare OX=112509 PE=3 SV=1	---	1.046	0.977	1.002	0.75	0.732	0.741	0.959	0.98	0.997	1.277	1.272	1.267	0.971	0.26542	0.735	0.000124518	1.717	1.0371e-7	1.3	2.0832e-05	chloroplast	GO:0006725 cellular aromatic compound metabolic process; GO:0006778 porphyrin-containing compound metabolic process; GO:0006779 porphyrin-containing compound biosynthetic process; GO:0006783 heme biosynthetic process; GO:0006807 nitrogen compound metabolic process; GO:0008152 metabolic process; GO:0009058 biosynthetic process; GO:0009987 cellular process; GO:0018130 heterocycle biosynthetic proce…	GO:0005622 intracellular; GO:0005623 cell; GO:0005737 cytoplasm; GO:0005829 cytosol; GO:0009507 chloroplast; GO:0009532 plastid stroma; GO:0009536 plastid; GO:0009570 chloroplast stroma; GO:0043226 organelle; GO:0043227 membrane-bounded organelle; GO:0043229 intracellular organelle; GO:0043231 intracellular membrane-bounded organelle; GO:0044422 organelle part; GO:0044424 intracellular part; GO:0…	GO:0003824 catalytic activity; GO:0004655 porphobilinogen synthase activity; GO:0005488 binding; GO:0008270 zinc ion binding; GO:0016829 lyase activity; GO:0016835 carbon-oxygen lyase activity; GO:0016836 hydro-lyase activity; GO:0043167 ion binding; GO:0043169 cation binding; GO:0046872 metal ion binding; GO:0046914 transition metal ion binding;	K01698	hemB, ALAD; porphobilinogen synthase [EC:4.2.1.24]	osa00860 Porphyrin and chlorophyll metabolism - Oryza sativa japonica (Japanese rice) (RefSeq); osa01100 Metabolic pathways - Oryza sativa japonica (Japanese rice) (RefSeq); osa01110 Biosynthesis of secondary metabolites - Oryza sativa japonica (Japanese rice) (RefSeq);	PF00490	Delta-aminolevulinic acid dehydratase	H	KOG2794	Delta-aminolevulinic acid dehydratase	A0A287FCX7	A0A287THW9	0.620651
Cluster3	A0A287TDE6	Aldo_ket_red domain-containing protein OS=Hordeum vulgare subsp. vulgare OX=112509 PE=4 SV=1	---	1.199	1.187	1.066	0.324	0.612	0.676	1.172	1.183	1.084	1.134	1.205	1.156	0.996	0.94972	0.467	0.0257	2.168	0.070698	1.016	0.64152	cytoplasm				K00011	AKR1B; aldehyde reductase [EC:1.1.1.21]		PF00248	Aldo/keto reductase family	S	KOG1577	Aldo/keto reductase family proteins		A0A287TDE6	0.482117
Cluster3	A0A287SZV1	Nascent polypeptide-associated complex subunit beta OS=Hordeum vulgare subsp. vulgare OX=112509 PE=3 SV=1	---	0.872	1	0.994	0.763	0.807	0.901	0.953	0.955	0.898	1.193	1.317	1.346	0.979	0.70982	0.862	0.08794	1.561	0.00190017	1.374	0.00169543	mitochondria	GO:0006950 response to stress; GO:0006970 response to osmotic stress; GO:0009628 response to abiotic stimulus; GO:0009651 response to salt stress; GO:0050896 response to stimulus;			K01527	EGD1, BTF3; nascent polypeptide-associated complex subunit beta				K	KOG2240	RNA polymerase II general transcription factor BTF3 and related proteins	M0X4P9	A0A287SZV1	0.411698
Cluster3	A0A287SF72	Cucumisin-like serine protease, putative, expressed(predicted) OS=Hordeum vulgare subsp. vulgare OX=112509 PE=3 SV=1	---	0.991	1.222	1.303	0.8	0.423	0.675	1.262	1.321	1.098	1.035	0.754	1.117	1.047	0.64538	0.54	0.036143	1.531	0.118643	0.789	0.135515	extracellular							PF05922; PF00082	Peptidase inhibitor I9; Subtilase family					A0A287SF72	0.346845
Cluster3	A0A287SCQ6	Beta-D-glucan exohydrolase isoenzyme ExoI(predicted) OS=Hordeum vulgare subsp. vulgare OX=112509 PE=4 SV=1	---	1.389	1.39	1.262	0.719	0.756	0.695	1.202	1.217	1.063	0.769	0.795	0.741	0.862	0.049665	0.537	0.00010178	1.062	0.129481	0.662	0.00099899	chloroplast				K01188	E3.2.1.21; beta-glucosidase [EC:3.2.1.21]	osa00460 Cyanoamino acid metabolism - Oryza sativa japonica (Japanese rice) (RefSeq); osa00500 Starch and sucrose metabolism - Oryza sativa japonica (Japanese rice) (RefSeq); osa00940 Phenylpropanoid biosynthesis - Oryza sativa japonica (Japanese rice) (RefSeq); osa01100 Metabolic pathways - Oryza sativa japonica (Japanese rice) (RefSeq); osa01110 Biosynthesis of secondary metabolites - Oryza sat…	PF00933; PF01915	Glycosyl hydrolase family 3 N terminal domain; Glycosyl hydrolase family 3 C-terminal domain					A0A287SCQ6	0.215209
Cluster3	A0A287S9N1	Pyruvate dehydrogenase E1 component subunit beta OS=Hordeum vulgare subsp. vulgare OX=112509 PE=4 SV=1	---	0.9	1.017	0.856	0.493	0.318	0.588	0.572	1.031	1.238	1.679	1.61	1.699	1.025	0.92614	0.505	0.0197979	3.565	0.0192607	1.756	0.11962	cytoplasm	GO:0000003 reproduction; GO:0003006 developmental process involved in reproduction; GO:0006082 organic acid metabolic process; GO:0006629 lipid metabolic process; GO:0006631 fatty acid metabolic process; GO:0006633 fatty acid biosynthetic process; GO:0008152 metabolic process; GO:0008610 lipid biosynthetic process; GO:0009058 biosynthetic process; GO:0009856 pollination; GO:0009987 cellular proce…	GO:0005622 intracellular; GO:0005623 cell; GO:0005737 cytoplasm; GO:0009507 chloroplast; GO:0009526 plastid envelope; GO:0009532 plastid stroma; GO:0009536 plastid; GO:0009570 chloroplast stroma; GO:0009941 chloroplast envelope; GO:0010240 plastid pyruvate dehydrogenase complex; GO:0031967 organelle envelope; GO:0031975 envelope; GO:0032991 macromolecular complex; GO:0043226 organelle; GO:0043227…	GO:0003824 catalytic activity; GO:0004738 pyruvate dehydrogenase activity; GO:0004739 pyruvate dehydrogenase (acetyl-transferring) activity; GO:0005488 binding; GO:0008270 zinc ion binding; GO:0016491 oxidoreductase activity; GO:0016624 oxidoreductase activity, acting on the aldehyde or oxo group of donors, disulfide as acceptor; GO:0016903 oxidoreductase activity, acting on the aldehyde or oxo g…	K00162	PDHB, pdhB; pyruvate dehydrogenase E1 component beta subunit [EC:1.2.4.1]	osa00010 Glycolysis / Gluconeogenesis - Oryza sativa japonica (Japanese rice) (RefSeq); osa00020 Citrate cycle (TCA cycle) - Oryza sativa japonica (Japanese rice) (RefSeq); osa00620 Pyruvate metabolism - Oryza sativa japonica (Japanese rice) (RefSeq); osa01100 Metabolic pathways - Oryza sativa japonica (Japanese rice) (RefSeq); osa01110 Biosynthesis of secondary metabolites - Oryza sativa japonic…	PF02779; PF02780	Transketolase, pyrimidine binding domain; Transketolase, C-terminal domain	C	KOG0524	Pyruvate dehydrogenase E1, beta subunit	A0A287RS44	A0A287S9N1	0.496166
Cluster3	A0A287RSR4	Bifunctional dihydroflavonol 4-reductase/flavanone 4-reductase(predicted) OS=Hordeum vulgare subsp. vulgare OX=112509 PE=4 SV=1	---	0.809	0.952	1.021	0.465	0.56	0.633	1.319	1.511	1.558	1.004	1.041	1.126	1.577	0.0059586	0.596	0.0099972	1.913	0.0023972	0.723	0.006204	cytoplasm									V	KOG1502	Flavonol reductase/cinnamoyl-CoA reductase	A0A287L8S4	A0A287RSR4	0.388377
Cluster3	A0A287R6Y3	TPR_REGION domain-containing protein OS=Hordeum vulgare subsp. vulgare OX=112509 PE=4 SV=1	---	1.008	0.753	0.97	0.751	0.639	0.746	1.174	1.358	1.252	1.174	1.059	1.115	1.386	0.029917	0.782	0.085179	1.567	0.0017369	0.885	0.077983	chloroplast		GO:0005622 intracellular; GO:0005623 cell; GO:0005737 cytoplasm; GO:0005829 cytosol; GO:0044424 intracellular part; GO:0044444 cytoplasmic part; GO:0044464 cell part;							DO	KOG4151	Myosin assembly protein/sexual cycle protein and related proteins	A0A287QRB3	A0A287R6Y3	0.351824
Cluster3	A0A287R221	Chalcone-flavonone isomerase family protein OS=Hordeum vulgare subsp. vulgare OX=112509 PE=3 SV=1	---	1.183	1.157	1.095	0.689	0.706	0.555	1.005	0.996	1.028	1.248	1.183	1.155	0.882	0.0072388	0.568	0.0020196	1.839	0.00153679	1.184	0.0024395	cytoplasm	GO:0008152 metabolic process; GO:0009058 biosynthetic process; GO:0009628 response to abiotic stimulus; GO:0009812 flavonoid metabolic process; GO:0009813 flavonoid biosynthetic process; GO:0050896 response to stimulus; GO:0071704 organic substance metabolic process; GO:0080167 response to karrikin; GO:1901576 organic substance biosynthetic process;	GO:0005622 intracellular; GO:0005623 cell; GO:0005737 cytoplasm; GO:0005783 endoplasmic reticulum; GO:0012505 endomembrane system; GO:0043226 organelle; GO:0043227 membrane-bounded organelle; GO:0043229 intracellular organelle; GO:0043231 intracellular membrane-bounded organelle; GO:0044424 intracellular part; GO:0044444 cytoplasmic part; GO:0044464 cell part;	GO:0003824 catalytic activity; GO:0016853 isomerase activity; GO:0016872 intramolecular lyase activity; GO:0045430 chalcone isomerase activity;	K01859	E5.5.1.6; chalcone isomerase [EC:5.5.1.6]	osa00941 Flavonoid biosynthesis - Oryza sativa japonica (Japanese rice) (RefSeq); osa01100 Metabolic pathways - Oryza sativa japonica (Japanese rice) (RefSeq); osa01110 Biosynthesis of secondary metabolites - Oryza sativa japonica (Japanese rice) (RefSeq);	PF02431	Chalcone-flavanone isomerase				A0A287H7K2	A0A287R221	0.547787
Cluster3	A0A287QM05	Prefoldin subunit 3 OS=Hordeum vulgare subsp. vulgare OX=112509 PE=3 SV=1	---	1.478	0.878	0.965	0.548	0.597	0.655	1.256	1.148	0.774	0.967	1.448	1.286	0.957	0.86908	0.542	0.02496	2.056	0.0055398	1.165	0.4506	extracellular	GO:0007017 microtubule-based process; GO:0007021 tubulin complex assembly; GO:0009987 cellular process; GO:0016043 cellular component organization; GO:0022607 cellular component assembly; GO:0034622 cellular macromolecular complex assembly; GO:0043933 macromolecular complex subunit organization; GO:0044085 cellular component biogenesis; GO:0065003 macromolecular complex assembly; GO:0071840 cellu…	GO:0005622 intracellular; GO:0005623 cell; GO:0005737 cytoplasm; GO:0005829 cytosol; GO:0005844 polysome; GO:0016272 prefoldin complex; GO:0032991 macromolecular complex; GO:0044424 intracellular part; GO:0044444 cytoplasmic part; GO:0044464 cell part; GO:1990904 ribonucleoprotein complex;	GO:0005488 binding; GO:0005515 protein binding; GO:0008092 cytoskeletal protein binding; GO:0015631 tubulin binding;						O	KOG3313	Molecular chaperone Prefoldin, subunit 3	S4Z202	A0A287QM05	0.462087
Cluster3	A0A287Q8Z0	Meth_synt_1 domain-containing protein OS=Hordeum vulgare subsp. vulgare OX=112509 PE=4 SV=1	---	1.142	1.062	0.945	0.655	0.523	0.579	1.262	1.216	1.145	1.162	1.159	1.15	1.151	0.083221	0.558	0.0023754	1.976	0.0089205	0.958	0.27814	cytoplasm	GO:0000096 sulfur amino acid metabolic process; GO:0000097 sulfur amino acid biosynthetic process; GO:0006082 organic acid metabolic process; GO:0006520 cellular amino acid metabolic process; GO:0006555 methionine metabolic process; GO:0006790 sulfur compound metabolic process; GO:0006807 nitrogen compound metabolic process; GO:0008152 metabolic process; GO:0008652 cellular amino acid biosyntheti…	GO:0005576 extracellular region; GO:0005622 intracellular; GO:0005623 cell; GO:0005737 cytoplasm; GO:0005829 cytosol; GO:0044424 intracellular part; GO:0044444 cytoplasmic part; GO:0044464 cell part;	GO:0003824 catalytic activity; GO:0003871 5-methyltetrahydropteroyltriglutamate-homocysteine S-methyltransferase activity; GO:0008168 methyltransferase activity; GO:0008172 S-methyltransferase activity; GO:0008705 methionine synthase activity; GO:0016740 transferase activity; GO:0016741 transferase activity, transferring one-carbon groups; GO:0042084 5-methyltetrahydrofolate-dependent methyltrans…	K00549	metE; 5-methyltetrahydropteroyltriglutamate--homocysteine methyltransferase [EC:2.1.1.14]	osa00270 Cysteine and methionine metabolism - Oryza sativa japonica (Japanese rice) (RefSeq); osa00450 Selenocompound metabolism - Oryza sativa japonica (Japanese rice) (RefSeq); osa01100 Metabolic pathways - Oryza sativa japonica (Japanese rice) (RefSeq); osa01110 Biosynthesis of secondary metabolites - Oryza sativa japonica (Japanese rice) (RefSeq); osa01230 Biosynthesis of amino acids - Oryza …	PF08267	Cobalamin-independent synthase, N-terminal domain	E	KOG2263	Methionine synthase II (cobalamin-independent)	F2ED30	A0A287Q8Z0	0.637036
Cluster3	A0A287Q837	NAD(P)H-quinone oxidoreductase chain 4, chloroplastic OS=Hordeum vulgare subsp. vulgare OX=112509 PE=4 SV=1	---	1.421	1.398	1.262	0.793	0.763	0.667	0.924	1.007	0.899	0.945	0.932	0.989	0.693	0.00192075	0.545	0.00069621	1.289	0.0098352	1.013	0.7442	vacuolar membrane									C	KOG4845	NADH dehydrogenase, subunit 4		A0A287Q837	0.256293
Cluster3	A0A287Q4Q3	Expressed protein(predicted) OS=Hordeum vulgare subsp. vulgare OX=112509 PE=4 SV=1	---	0.939	0.88	0.9	0.65	0.697	0.676	1.096	0.995	1.047	1.374	1.392	1.355	1.154	0.013378	0.744	0.00043963	2.037	2.551e-06	1.313	0.00070306	chloroplast							PF01329	Pterin 4 alpha carbinolamine dehydratase				A0A287M0E0	A0A287Q4Q3	0.638155
Cluster3	A0A287PXJ6	60s ribosomal protein L21 (Fragment)(predicted) OS=Hordeum vulgare subsp. vulgare OX=112509 PE=4 SV=1	---	1.074	1.152	1.028	0.622	0.512	0.621	1.363	1.324	1.106	0.988	1.103	1.108	1.166	0.109743	0.539	0.0010353	1.823	0.00127907	0.843	0.090223	cytoplasm	GO:0006412 translation; GO:0006518 peptide metabolic process; GO:0006807 nitrogen compound metabolic process; GO:0008152 metabolic process; GO:0009058 biosynthetic process; GO:0009059 macromolecule biosynthetic process; GO:0009987 cellular process; GO:0010467 gene expression; GO:0019538 protein metabolic process; GO:0034641 cellular nitrogen compound metabolic process; GO:0034645 cellular macromo…	GO:0005622 intracellular; GO:0005623 cell; GO:0005737 cytoplasm; GO:0005829 cytosol; GO:0005840 ribosome; GO:0015934 large ribosomal subunit; GO:0022625 cytosolic large ribosomal subunit; GO:0022626 cytosolic ribosome; GO:0032991 macromolecular complex; GO:0043226 organelle; GO:0043228 non-membrane-bounded organelle; GO:0043229 intracellular organelle; GO:0043232 intracellular non-membrane-bounde…	GO:0003735 structural constituent of ribosome; GO:0005198 structural molecule activity;	K02889	RP-L21e, RPL21; large subunit ribosomal protein L21e	osa03010 Ribosome - Oryza sativa japonica (Japanese rice) (RefSeq);			J	KOG1732	60S ribosomal protein L21	A0A287JVY4	A0A287PXJ6	0.517161
Cluster3	A0A287PVH4	EF hand family protein, expressed(predicted) OS=Hordeum vulgare subsp. vulgare OX=112509 PE=4 SV=1	---	0.978	0.96	1.076	0.709	0.817	0.493	1.078	1.131	0.874	1.385	1.446	1.054	1.023	0.84746	0.67	0.052681	1.924	0.020783	1.26	0.146643	nucleus	GO:0000147 actin cortical patch assembly; GO:0006810 transport; GO:0006886 intracellular protein transport; GO:0006897 endocytosis; GO:0006996 organelle organization; GO:0007010 cytoskeleton organization; GO:0008104 protein localization; GO:0009987 cellular process; GO:0015031 protein transport; GO:0015833 peptide transport; GO:0016043 cellular component organization; GO:0016192 vesicle-mediated …	GO:0005622 intracellular; GO:0005623 cell; GO:0005737 cytoplasm; GO:0005856 cytoskeleton; GO:0005938 cell cortex; GO:0015629 actin cytoskeleton; GO:0030479 actin cortical patch; GO:0030863 cortical cytoskeleton; GO:0030864 cortical actin cytoskeleton; GO:0043226 organelle; GO:0043228 non-membrane-bounded organelle; GO:0043229 intracellular organelle; GO:0043232 intracellular non-membrane-bounded …	GO:0005488 binding; GO:0005509 calcium ion binding; GO:0043167 ion binding; GO:0043169 cation binding; GO:0046872 metal ion binding;				PF13202	EF hand	TU	KOG0998	Synaptic vesicle protein EHS-1 and related EH domain proteins	A0A287WM51	A0A287PVH4	0.466393
Cluster3	A0A287PGT0	Smr domain-containing protein OS=Hordeum vulgare subsp. vulgare OX=112509 PE=4 SV=1	---	1.043	0.926	1.007	0.581	0.704	0.502	1.388	1.384	1.204	1.154	0.873	1.231	1.336	0.0079417	0.6	0.0075966	1.823	0.0140796	0.819	0.14624	chloroplast	GO:0006139 nucleobase-containing compound metabolic process; GO:0006396 RNA processing; GO:0006417 regulation of translation; GO:0006725 cellular aromatic compound metabolic process; GO:0006807 nitrogen compound metabolic process; GO:0006996 organelle organization; GO:0008152 metabolic process; GO:0009451 RNA modification; GO:0009657 plastid organization; GO:0009658 chloroplast organization; GO:0…	GO:0005622 intracellular; GO:0005623 cell; GO:0005737 cytoplasm; GO:0009507 chloroplast; GO:0009532 plastid stroma; GO:0009536 plastid; GO:0009570 chloroplast stroma; GO:0043226 organelle; GO:0043227 membrane-bounded organelle; GO:0043229 intracellular organelle; GO:0043231 intracellular membrane-bounded organelle; GO:0044422 organelle part; GO:0044424 intracellular part; GO:0044434 chloroplast p…	GO:0003676 nucleic acid binding; GO:0003723 RNA binding; GO:0003729 mRNA binding; GO:0003824 catalytic activity; GO:0004518 nuclease activity; GO:0004519 endonuclease activity; GO:0005488 binding; GO:0016787 hydrolase activity; GO:0016788 hydrolase activity, acting on ester bonds; GO:0097159 organic cyclic compound binding; GO:1901363 heterocyclic compound binding;						GH	KOG4197	FOG: PPR repeat	A0A287RGX3	A0A287PGT0	0.436374
Cluster3	A0A287PCW0	Clp amino terminal domain containing protein, expressed(predicted) OS=Hordeum vulgare subsp. vulgare OX=112509 PE=4 SV=1	---	1.322	0.954	1.315	0.702	0.748	0.811	0.842	0.91	0.784	1.269	1.225	1.117	0.706	0.043477	0.63	0.0172804	1.597	0.00115709	1.424	0.0035221	chloroplast		GO:0005622 intracellular; GO:0005623 cell; GO:0005737 cytoplasm; GO:0009507 chloroplast; GO:0009526 plastid envelope; GO:0009532 plastid stroma; GO:0009536 plastid; GO:0009570 chloroplast stroma; GO:0009579 thylakoid; GO:0009941 chloroplast envelope; GO:0031967 organelle envelope; GO:0031975 envelope; GO:0043226 organelle; GO:0043227 membrane-bounded organelle; GO:0043229 intracellular organelle;…										M0VXX9	A0A287PCW0	0.337684
Cluster3	A0A287P0D0	Expressed protein(predicted) OS=Hordeum vulgare subsp. vulgare OX=112509 PE=4 SV=1	---	0.949	0.944	0.95	0.821	0.878	0.847	0.93	0.946	0.906	1.28	1.295	1.255	0.979	0.22796	0.896	0.029624	1.504	4.2349e-05	1.377	3.6499e-05	chloroplast												A0A287DY20	A0A287P0D0	0.40161
Cluster3	A0A287LLI6	Number of grains 1(predicted) OS=Hordeum vulgare subsp. vulgare OX=112509 PE=3 SV=1	---	1.065	0.853	1.064	0.563	0.894	0.709	1.214	1.099	1.109	1.235	1.109	1.085	1.148	0.152216	0.726	0.095035	1.583	0.026978	1.002	0.97882	cytoplasm				K05605	HIBCH; 3-hydroxyisobutyryl-CoA hydrolase [EC:3.1.2.4]	osa00280 Valine, leucine and isoleucine degradation - Oryza sativa japonica (Japanese rice) (RefSeq); osa00410 beta-Alanine metabolism - Oryza sativa japonica (Japanese rice) (RefSeq); osa00640 Propanoate metabolism - Oryza sativa japonica (Japanese rice) (RefSeq); osa01100 Metabolic pathways - Oryza sativa japonica (Japanese rice) (RefSeq); osa01200 Carbon metabolism - Oryza sativa japonica (Jap…						F2D170	A0A287LLI6	0.439173
Cluster3	A0A287K7S7	PKS_ER domain-containing protein OS=Hordeum vulgare subsp. vulgare OX=112509 PE=4 SV=1	---	0.856	0.972	0.969	0.429	0.497	0.539	1.318	1.34	1.279	1.234	1.256	1.311	1.408	0.0014584	0.524	0.00118222	2.595	0.00015898	0.965	0.19274	cytoplasm									S	KOG1196	Predicted NAD-dependent oxidoreductase	A0A287R189	A0A287K7S7	0.678335
Cluster3	A0A287K336	RAB1-like(predicted) OS=Hordeum vulgare subsp. vulgare OX=112509 PE=4 SV=1	---	1.08	0.995	1.109	0.681	0.703	0.787	1.05	1.112	1.086	1.122	1.203	1.072	1.02	0.60268	0.682	0.0021764	1.565	0.00125522	1.046	0.30494	cytoplasm				K07874	RAB1A; Ras-related protein Rab-1A		PF00071	Ras family	U	KOG0084	GTPase Rab1/YPT1, small G protein superfamily, and related GTP-binding proteins	A0A287T4B0	A0A287K336	0.623792
Cluster3	A0A287JHF7	D-3-phosphoglycerate dehydrogenase OS=Hordeum vulgare subsp. vulgare OX=112509 PE=3 SV=1	---	1.105	1.216	1.021	0.702	0.893	0.544	1.065	1.11	1.004	1.132	1.085	1.123	0.951	0.45424	0.64	0.037756	1.561	0.083423	1.051	0.191476	chloroplast	GO:0000003 reproduction; GO:0003006 developmental process involved in reproduction; GO:0007275 multicellular organism development; GO:0009553 embryo sac development; GO:0009555 pollen development; GO:0009561 megagametogenesis; GO:0009790 embryo development; GO:0009791 post-embryonic development; GO:0009793 embryo development ending in seed dormancy; GO:0010154 fruit development; GO:0022414 reprod…	GO:0005622 intracellular; GO:0005623 cell; GO:0005737 cytoplasm; GO:0005739 mitochondrion; GO:0009507 chloroplast; GO:0009532 plastid stroma; GO:0009536 plastid; GO:0009570 chloroplast stroma; GO:0016020 membrane; GO:0043226 organelle; GO:0043227 membrane-bounded organelle; GO:0043229 intracellular organelle; GO:0043231 intracellular membrane-bounded organelle; GO:0044422 organelle part; GO:00444…	GO:0000166 nucleotide binding; GO:0005488 binding; GO:0005524 ATP binding; GO:0008144 drug binding; GO:0017076 purine nucleotide binding; GO:0030554 adenyl nucleotide binding; GO:0032553 ribonucleotide binding; GO:0032555 purine ribonucleotide binding; GO:0032559 adenyl ribonucleotide binding; GO:0035639 purine ribonucleoside triphosphate binding; GO:0036094 small molecule binding; GO:0043167 ion…	K00058	serA, PHGDH; D-3-phosphoglycerate dehydrogenase / 2-oxoglutarate reductase [EC:1.1.1.95 1.1.1.399]	osa00260 Glycine, serine and threonine metabolism - Oryza sativa japonica (Japanese rice) (RefSeq); osa00270 Cysteine and methionine metabolism - Oryza sativa japonica (Japanese rice) (RefSeq); osa01100 Metabolic pathways - Oryza sativa japonica (Japanese rice) (RefSeq); osa01200 Carbon metabolism - Oryza sativa japonica (Japanese rice) (RefSeq); osa01230 Biosynthesis of amino acids - Oryza sativ…	PF00389; PF02826; PF01842	D-isomer specific 2-hydroxyacid dehydrogenase, catalytic domain; D-isomer specific 2-hydroxyacid dehydrogenase, NAD binding domain; ACT domain	E	KOG0068	D-3-phosphoglycerate dehydrogenase, D-isomer-specific 2-hydroxy acid dehydrogenase superfamily		A0A287JHF7	0.442371
Cluster3	A0A287J4U5	UDP-N-acetylglucosamine diphosphorylase 2(predicted) OS=Hordeum vulgare subsp. vulgare OX=112509 PE=4 SV=1	---	1.018	0.984	0.904	0.692	0.635	0.589	1.391	1.095	1.163	1.11	1.178	1.241	1.256	0.049124	0.659	0.0020354	1.842	0.00041795	0.967	0.72934	chloroplast	GO:0000003 reproduction; GO:0003006 developmental process involved in reproduction; GO:0006011 UDP-glucose metabolic process; GO:0006040 amino sugar metabolic process; GO:0006047 UDP-N-acetylglucosamine metabolic process; GO:0006048 UDP-N-acetylglucosamine biosynthetic process; GO:0006139 nucleobase-containing compound metabolic process; GO:0006725 cellular aromatic compound metabolic process; GO…	GO:0005622 intracellular; GO:0005623 cell; GO:0005737 cytoplasm; GO:0005829 cytosol; GO:0005886 plasma membrane; GO:0016020 membrane; GO:0044424 intracellular part; GO:0044444 cytoplasmic part; GO:0044464 cell part; GO:0071944 cell periphery;	GO:0003824 catalytic activity; GO:0003977 UDP-N-acetylglucosamine diphosphorylase activity; GO:0003983 UTP:glucose-1-phosphate uridylyltransferase activity; GO:0016740 transferase activity; GO:0016772 transferase activity, transferring phosphorus-containing groups; GO:0016779 nucleotidyltransferase activity; GO:0051748 UTP-monosaccharide-1-phosphate uridylyltransferase activity; GO:0052630 UDP-N-…	K00972	UAP1; UDP-N-acetylglucosamine/UDP-N-acetylgalactosamine diphosphorylase [EC:2.7.7.23 2.7.7.83]	osa00520 Amino sugar and nucleotide sugar metabolism - Oryza sativa japonica (Japanese rice) (RefSeq); osa01100 Metabolic pathways - Oryza sativa japonica (Japanese rice) (RefSeq);			M	KOG2388	UDP-N-acetylglucosamine pyrophosphorylase	M0UFI4	A0A287J4U5	0.611568
Cluster3	A0A287J045	HMA domain-containing protein OS=Hordeum vulgare subsp. vulgare OX=112509 PE=4 SV=1	---	0.839	0.889	0.996	0.925	0.595	0.845	1.079	1.039	1.006	1.183	1.303	1.3	1.147	0.062441	0.868	0.33832	1.601	0.024422	1.212	0.0070813	cytoplasm	GO:0006873 cellular ion homeostasis; GO:0006875 cellular metal ion homeostasis; GO:0006878 cellular copper ion homeostasis; GO:0009987 cellular process; GO:0019725 cellular homeostasis; GO:0030003 cellular cation homeostasis; GO:0042592 homeostatic process; GO:0043085 positive regulation of catalytic activity; GO:0044093 positive regulation of molecular function; GO:0046916 cellular transition me…	GO:0005622 intracellular; GO:0005623 cell; GO:0005737 cytoplasm; GO:0009507 chloroplast; GO:0009532 plastid stroma; GO:0009536 plastid; GO:0009570 chloroplast stroma; GO:0043226 organelle; GO:0043227 membrane-bounded organelle; GO:0043229 intracellular organelle; GO:0043231 intracellular membrane-bounded organelle; GO:0044422 organelle part; GO:0044424 intracellular part; GO:0044434 chloroplast p…	GO:0005488 binding; GO:0005507 copper ion binding; GO:0008047 enzyme activator activity; GO:0008270 zinc ion binding; GO:0016530 metallochaperone activity; GO:0016531 copper chaperone activity; GO:0016532 superoxide dismutase copper chaperone activity; GO:0030234 enzyme regulator activity; GO:0043167 ion binding; GO:0043169 cation binding; GO:0046872 metal ion binding; GO:0046914 transition metal…	K04569	CCS; copper chaperone for superoxide dismutase		PF00403; PF00080	Heavy-metal-associated domain; Copper/zinc superoxide dismutase (SODC)	P	KOG4656	Copper chaperone for superoxide dismutase	A0A287H6X8	A0A287J045	0.397647
Cluster3	A0A287ITA6	Polyadenylate-binding protein OS=Hordeum vulgare subsp. vulgare OX=112509 PE=3 SV=1	---	0.827	0.93	0.929	0.772	0.857	0.794	0.996	1.047	1.079	1.219	1.256	1.294	1.162	0.029003	0.902	0.109144	1.556	0.00024112	1.207	0.0028956	cytoplasm	GO:0006412 translation; GO:0006413 translational initiation; GO:0006417 regulation of translation; GO:0006446 regulation of translational initiation; GO:0006518 peptide metabolic process; GO:0006807 nitrogen compound metabolic process; GO:0006950 response to stress; GO:0006970 response to osmotic stress; GO:0008152 metabolic process; GO:0009058 biosynthetic process; GO:0009059 macromolecule biosy…	GO:0005622 intracellular; GO:0005623 cell; GO:0005737 cytoplasm; GO:0005829 cytosol; GO:0044424 intracellular part; GO:0044444 cytoplasmic part; GO:0044464 cell part;	GO:0003676 nucleic acid binding; GO:0003723 RNA binding; GO:0003729 mRNA binding; GO:0003743 translation initiation factor activity; GO:0005488 binding; GO:0008135 translation factor activity, RNA binding; GO:0097159 organic cyclic compound binding; GO:1901363 heterocyclic compound binding;	K13126	PABPC; polyadenylate-binding protein	osa03013 RNA transport - Oryza sativa japonica (Japanese rice) (RefSeq); osa03015 mRNA surveillance pathway - Oryza sativa japonica (Japanese rice) (RefSeq); osa03018 RNA degradation - Oryza sativa japonica (Japanese rice) (RefSeq);	PF00076	RNA recognition motif. (a.k.a. RRM, RBD, or RNP domain)	A	KOG0123	Polyadenylate-binding protein (RRM superfamily)	F2E2F1	A0A287ITA6	0.403921
Cluster3	A0A287ITA2	Protein binding protein(predicted) OS=Hordeum vulgare subsp. vulgare OX=112509 PE=4 SV=1	---	1.16	1.217	1.254	0.748	0.678	0.829	1.139	1.158	1.11	0.897	0.934	0.876	0.938	0.070283	0.621	0.0015396	1.2	0.038221	0.795	0.00050308	mitochondria													A0A287ITA2	0.298463
Cluster3	A0A287ISH2	Ribosomal_L23eN domain-containing protein OS=Hordeum vulgare subsp. vulgare OX=112509 PE=4 SV=2	---	0.662	1.42	1.332	0.922	0.577	1.028	1.399	1.117	1.185	0.809	0.736	0.814	1.084	0.63406	0.74	0.41212	0.934	0.83412	0.637	0.0039584	chloroplast				K02893	RP-L23Ae, RPL23A; large subunit ribosomal protein L23Ae	osa03010 Ribosome - Oryza sativa japonica (Japanese rice) (RefSeq);			J	KOG1751	60s ribosomal protein L23		A0A287ISH2	0.190469
Cluster3	A0A287HQD0	Geranylgeranyl pyrophosphate synthetase, chloroplastic(predicted) OS=Hordeum vulgare subsp. vulgare OX=112509 PE=4 SV=1	---	1.143	1.136	1.003	0.724	0.777	0.689	0.977	0.993	0.992	1.187	1.164	1.215	0.902	0.143099	0.667	0.00183653	1.628	0.000195119	1.204	0.000160461	chloroplast	GO:0000003 reproduction; GO:0003006 developmental process involved in reproduction; GO:0006629 lipid metabolic process; GO:0006720 isoprenoid metabolic process; GO:0007275 multicellular organism development; GO:0008152 metabolic process; GO:0008299 isoprenoid biosynthetic process; GO:0008610 lipid biosynthetic process; GO:0009058 biosynthetic process; GO:0009790 embryo development; GO:0009791 pos…	GO:0005622 intracellular; GO:0005623 cell; GO:0005737 cytoplasm; GO:0005739 mitochondrion; GO:0005783 endoplasmic reticulum; GO:0005829 cytosol; GO:0009507 chloroplast; GO:0009513 etioplast; GO:0009536 plastid; GO:0012505 endomembrane system; GO:0043226 organelle; GO:0043227 membrane-bounded organelle; GO:0043229 intracellular organelle; GO:0043231 intracellular membrane-bounded organelle; GO:004…	GO:0003824 catalytic activity; GO:0004161 dimethylallyltranstransferase activity; GO:0004311 farnesyltranstransferase activity; GO:0004659 prenyltransferase activity; GO:0016740 transferase activity; GO:0016765 transferase activity, transferring alkyl or aryl (other than methyl) groups;	K13789	GGPS; geranylgeranyl diphosphate synthase, type II [EC:2.5.1.1 2.5.1.10 2.5.1.29]	osa00900 Terpenoid backbone biosynthesis - Oryza sativa japonica (Japanese rice) (RefSeq); osa01100 Metabolic pathways - Oryza sativa japonica (Japanese rice) (RefSeq); osa01110 Biosynthesis of secondary metabolites - Oryza sativa japonica (Japanese rice) (RefSeq);	PF00348	Polyprenyl synthetase	H	KOG0776	Geranylgeranyl pyrophosphate synthase/Polyprenyl synthetase	A0A287FAE8	A0A287HQD0	0.567287
Cluster3	A0A287HDF9	DUF3479 domain-containing protein OS=Hordeum vulgare subsp. vulgare OX=112509 PE=4 SV=1	---	0.92	0.864	0.887	0.777	0.777	0.73	1.143	1.124	1.129	1.233	1.199	1.219	1.271	0.00021965	0.855	0.0047826	1.599	3.5121e-05	1.075	0.00162042	chloroplast		GO:0005622 intracellular; GO:0005623 cell; GO:0005737 cytoplasm; GO:0005739 mitochondrion; GO:0009507 chloroplast; GO:0009526 plastid envelope; GO:0009528 plastid inner membrane; GO:0009532 plastid stroma; GO:0009536 plastid; GO:0009570 chloroplast stroma; GO:0009706 chloroplast inner membrane; GO:0009941 chloroplast envelope; GO:0010007 magnesium chelatase complex; GO:0016020 membrane; GO:001986…	GO:0003824 catalytic activity; GO:0016851 magnesium chelatase activity; GO:0016874 ligase activity; GO:0051002 ligase activity, forming nitrogen-metal bonds; GO:0051003 ligase activity, forming nitrogen-metal bonds, forming coordination complexes;	K03403	chlH, bchH; magnesium chelatase subunit H [EC:6.6.1.1]	osa00860 Porphyrin and chlorophyll metabolism - Oryza sativa japonica (Japanese rice) (RefSeq); osa01100 Metabolic pathways - Oryza sativa japonica (Japanese rice) (RefSeq); osa01110 Biosynthesis of secondary metabolites - Oryza sativa japonica (Japanese rice) (RefSeq);						A0A287UBI8	A0A287HDF9	0.454754
Cluster3	A0A287H6X8	FSH1 domain-containing protein OS=Hordeum vulgare subsp. vulgare OX=112509 PE=4 SV=1	---	0.959	0.976	0.947	0.667	0.637	0.612	1.162	1.128	1.153	1.078	1.311	1.37	1.195	0.000140229	0.665	0.000100436	1.962	0.00100067	1.092	0.38156	cytoplasm							PF03959	Serine hydrolase (FSH1)	E	KOG2551	Phospholipase/carboxyhydrolase	A0A287PXJ6	A0A287H6X8	0.731581
Cluster3	A0A287H4P7	FA_desaturase domain-containing protein OS=Hordeum vulgare subsp. vulgare OX=112509 PE=4 SV=1	---	0.892	0.914	0.861	0.648	0.621	0.625	1.177	1.188	1.202	1.279	1.292	1.302	1.337	9.6448e-05	0.71	9.833e-05	2.045	4.6638e-7	1.086	0.00049861	chloroplast				K10257	FAD3, FAD7, FAD8, desB; acyl-lipid omega-3 desaturase [EC:1.14.19.25 1.14.19.35 1.14.19.36]		PF00487	Fatty acid desaturase				A0A287SCQ6	A0A287H4P7	0.727857
Cluster3	A0A287GYR4	Subtilisin-like protease(predicted) OS=Hordeum vulgare subsp. vulgare OX=112509 PE=4 SV=1	---	0.977	1.056	0.937	0.796	0.876	0.812	0.927	0.894	0.915	1.281	1.292	1.239	0.921	0.091461	0.836	0.0173771	1.535	0.000177928	1.393	3.854e-05	chloroplast												A0A287ULK9	A0A287GYR4	0.418662
Cluster3	A0A287G0Y2	DUF1995 domain-containing protein OS=Hordeum vulgare subsp. vulgare OX=112509 PE=4 SV=1	---	1.228	1.255	1.192	0.757	0.669	0.64	1.094	0.972	0.96	1.082	1.143	1.008	0.823	0.0114419	0.562	0.00038174	1.565	0.00193602	1.068	0.29476	chloroplast							PF09353	Domain of unknown function (DUF1995)				F2DC44	A0A287G0Y2	0.432606
Cluster3	A0A287FZE4	Heavy metal transport/detoxification superfamily protein(predicted) OS=Hordeum vulgare subsp. vulgare OX=112509 PE=4 SV=1	---	1.35	1.391	1.195	0.772	0.676	0.765	0.836	0.786	0.797	1.211	1.13	1.089	0.615	0.00063761	0.562	0.00080285	1.55	0.00115711	1.418	0.00065852	chloroplast												F2D903	A0A287FZE4	0.289897
Cluster3	A0A287FUT0	TRANSKETOLASE_1 domain-containing protein OS=Hordeum vulgare subsp. vulgare OX=112509 PE=3 SV=1	---	0.851	0.817	0.761	0.579	0.406	0.503	1.259	1.159	1.22	1.376	1.625	1.444	1.498	0.00057521	0.613	0.0099208	2.987	0.00064444	1.222	0.022561	cytoplasm	GO:0006081 cellular aldehyde metabolic process; GO:0006082 organic acid metabolic process; GO:0006090 pyruvate metabolic process; GO:0006629 lipid metabolic process; GO:0006644 phospholipid metabolic process; GO:0006720 isoprenoid metabolic process; GO:0006725 cellular aromatic compound metabolic process; GO:0006778 porphyrin-containing compound metabolic process; GO:0006779 porphyrin-containing …	GO:0005622 intracellular; GO:0005623 cell; GO:0005737 cytoplasm; GO:0009507 chloroplast; GO:0009536 plastid; GO:0043226 organelle; GO:0043227 membrane-bounded organelle; GO:0043229 intracellular organelle; GO:0043231 intracellular membrane-bounded organelle; GO:0044424 intracellular part; GO:0044444 cytoplasmic part; GO:0044464 cell part;	GO:0003824 catalytic activity; GO:0008661 1-deoxy-D-xylulose-5-phosphate synthase activity; GO:0016740 transferase activity; GO:0016744 transferase activity, transferring aldehyde or ketonic groups;	K01662	dxs; 1-deoxy-D-xylulose-5-phosphate synthase [EC:2.2.1.7]	osa00730 Thiamine metabolism - Oryza sativa japonica (Japanese rice) (RefSeq); osa00900 Terpenoid backbone biosynthesis - Oryza sativa japonica (Japanese rice) (RefSeq); osa01100 Metabolic pathways - Oryza sativa japonica (Japanese rice) (RefSeq); osa01110 Biosynthesis of secondary metabolites - Oryza sativa japonica (Japanese rice) (RefSeq);	PF02779; PF02780	Transketolase, pyrimidine binding domain; Transketolase, C-terminal domain	G	KOG0523	Transketolase	A0A287TTF0	A0A287FUT0	0.664366
Cluster3	A0A287FNB0	Pyruvate kinase OS=Hordeum vulgare subsp. vulgare OX=112509 PE=3 SV=1	---	1.083	0.864	0.798	0.776	0.827	0.661	1.111	1.125	1.104	1.192	1.176	1.284	1.217	0.155103	0.825	0.17118	1.613	0.0025999	1.093	0.033584	cytoskeleton				K00873	PK, pyk; pyruvate kinase [EC:2.7.1.40]	osa00010 Glycolysis / Gluconeogenesis - Oryza sativa japonica (Japanese rice) (RefSeq); osa00230 Purine metabolism - Oryza sativa japonica (Japanese rice) (RefSeq); osa00620 Pyruvate metabolism - Oryza sativa japonica (Japanese rice) (RefSeq); osa01100 Metabolic pathways - Oryza sativa japonica (Japanese rice) (RefSeq); osa01110 Biosynthesis of secondary metabolites - Oryza sativa japonica (Japan…	PF02887	Pyruvate kinase, alpha/beta domain	G	KOG3363	Uncharacterized conserved nuclear protein	A0A287SUL6	A0A287FNB0	0.442088
Cluster3	A0A287FCX7	NADPH-protochlorophyllide oxidoreductase OS=Hordeum vulgare subsp. vulgare OX=112509 PE=3 SV=1	---	0.812	0.782	0.755	0.613	0.5	0.644	1.208	1.208	1.186	1.376	1.444	1.47	1.533	4.019e-05	0.748	0.021101	2.442	0.0003587	1.191	0.00107942	chloroplast		GO:0005622 intracellular; GO:0005623 cell; GO:0005737 cytoplasm; GO:0009507 chloroplast; GO:0009536 plastid; GO:0043226 organelle; GO:0043227 membrane-bounded organelle; GO:0043229 intracellular organelle; GO:0043231 intracellular membrane-bounded organelle; GO:0044424 intracellular part; GO:0044444 cytoplasmic part; GO:0044464 cell part;					PF00106	short chain dehydrogenase	Q	KOG1208	Dehydrogenases with different specificities (related to short-chain alcohol dehydrogenases)	A0A287XF12	A0A287FCX7	0.485925
Cluster3	A0A287FAE8	Nascent polypeptide-associated complex subunit beta OS=Hordeum vulgare subsp. vulgare OX=112509 PE=3 SV=1	---	1.203	1.017	0.968	0.653	0.495	0.779	1.129	1.023	1.028	1.235	1.188	1.282	0.997	0.99134	0.604	0.024898	1.923	0.0074385	1.165	0.0169171	chloroplast				K01527	EGD1, BTF3; nascent polypeptide-associated complex subunit beta				K	KOG2240	RNA polymerase II general transcription factor BTF3 and related proteins	M0VZB7	A0A287FAE8	0.574845
Cluster3	A0A287F5K5	Translin family protein, expressed(predicted) OS=Hordeum vulgare subsp. vulgare OX=112509 PE=4 SV=1	---	1.316	1.156	1.179	0.722	0.465	0.765	0.999	1.078	1.04	1.041	1.041	1.202	0.854	0.026842	0.535	0.0162385	1.682	0.030121	1.054	0.39384	chloroplast		GO:0005622 intracellular; GO:0005623 cell; GO:0005634 nucleus; GO:0043226 organelle; GO:0043227 membrane-bounded organelle; GO:0043229 intracellular organelle; GO:0043231 intracellular membrane-bounded organelle; GO:0044424 intracellular part; GO:0044464 cell part;							S	KOG3067	Translin family protein	F2D4I4	A0A287F5K5	0.430126
Cluster3	A0A287EUR5	Probable 4-hydroxy-tetrahydrodipicolinate reductase 1, chloroplastic(predicted) OS=Hordeum vulgare subsp. vulgare OX=112509 PE=4 SV=1	---	0.933	0.998	0.934	0.918	0.68	0.881	1.023	0.978	0.916	1.198	1.286	1.255	1.018	0.6779	0.865	0.188718	1.508	0.0120995	1.282	0.0028763	nucleus	GO:0006082 organic acid metabolic process; GO:0006520 cellular amino acid metabolic process; GO:0006807 nitrogen compound metabolic process; GO:0008152 metabolic process; GO:0008652 cellular amino acid biosynthetic process; GO:0009058 biosynthetic process; GO:0009987 cellular process; GO:0016053 organic acid biosynthetic process; GO:0019752 carboxylic acid metabolic process; GO:0019877 diaminopim…	GO:0005622 intracellular; GO:0005623 cell; GO:0005737 cytoplasm; GO:0009507 chloroplast; GO:0009532 plastid stroma; GO:0009536 plastid; GO:0009570 chloroplast stroma; GO:0043226 organelle; GO:0043227 membrane-bounded organelle; GO:0043229 intracellular organelle; GO:0043231 intracellular membrane-bounded organelle; GO:0044422 organelle part; GO:0044424 intracellular part; GO:0044434 chloroplast p…	GO:0003824 catalytic activity; GO:0008839 4-hydroxy-tetrahydrodipicolinate reductase; GO:0016491 oxidoreductase activity; GO:0016627 oxidoreductase activity, acting on the CH-CH group of donors; GO:0016628 oxidoreductase activity, acting on the CH-CH group of donors, NAD or NADP as acceptor;	K00215	dapB; 4-hydroxy-tetrahydrodipicolinate reductase [EC:1.17.1.8]	osa00261 Monobactam biosynthesis - Oryza sativa japonica (Japanese rice) (RefSeq); osa00300 Lysine biosynthesis - Oryza sativa japonica (Japanese rice) (RefSeq); osa01100 Metabolic pathways - Oryza sativa japonica (Japanese rice) (RefSeq); osa01110 Biosynthesis of secondary metabolites - Oryza sativa japonica (Japanese rice) (RefSeq); osa01230 Biosynthesis of amino acids - Oryza sativa japonica (…	PF01113; PF05173	Dihydrodipicolinate reductase, N-terminus; Dihydrodipicolinate reductase, C-terminus				A0A287U4U9	A0A287EUR5	0.429124
Cluster3	A0A287E6K3	Tyrosine--tRNA ligase 1, cytoplasmic-like(predicted) OS=Hordeum vulgare subsp. vulgare OX=112509 PE=3 SV=1	---	1.172	0.986	0.891	0.71	0.63	0.742	1.115	1.158	1.166	1.12	1.203	1.107	1.128	0.193961	0.683	0.0158034	1.647	0.00082344	0.997	0.92108	cytoplasm	GO:0006082 organic acid metabolic process; GO:0006139 nucleobase-containing compound metabolic process; GO:0006399 tRNA metabolic process; GO:0006412 translation; GO:0006418 tRNA aminoacylation for protein translation; GO:0006437 tyrosyl-tRNA aminoacylation; GO:0006518 peptide metabolic process; GO:0006520 cellular amino acid metabolic process; GO:0006725 cellular aromatic compound metabolic proc…		GO:0000166 nucleotide binding; GO:0003824 catalytic activity; GO:0004812 aminoacyl-tRNA ligase activity; GO:0004831 tyrosine-tRNA ligase activity; GO:0005488 binding; GO:0005515 protein binding; GO:0005524 ATP binding; GO:0008144 drug binding; GO:0016597 amino acid binding; GO:0016874 ligase activity; GO:0016875 ligase activity, forming carbon-oxygen bonds; GO:0017076 purine nucleotide binding; G…	K01866	YARS, tyrS; tyrosyl-tRNA synthetase [EC:6.1.1.1]	osa00970 Aminoacyl-tRNA biosynthesis - Oryza sativa japonica (Japanese rice) (RefSeq);			J	KOG2144	Tyrosyl-tRNA synthetase, cytoplasmic	A0A287E6K3	A0A287E6K3	0.611911
Cluster3	A0A287E5I8	Abhydrolase_3 domain-containing protein OS=Hordeum vulgare subsp. vulgare OX=112509 PE=4 SV=1	---	1.313	1.211	1.112	0.941	0.69	0.705	0.931	1	0.984	1.073	1.056	0.984	0.802	0.0140963	0.642	0.0153409	1.333	0.045602	1.068	0.128882	chloroplast							PF07859	alpha/beta hydrolase fold	V	KOG1515	Arylacetamide deacetylase		A0A287E5I8	0.331902
Cluster3	A0A287E5H0	Abhydrolase_3 domain-containing protein OS=Hordeum vulgare subsp. vulgare OX=112509 PE=4 SV=1	---	0.995	1.009	1.014	0.716	0.812	0.724	1.123	1.014	1.043	1.186	1.19	1.174	1.054	0.172357	0.746	0.0185033	1.576	0.0077406	1.116	0.068778	cytoplasm	GO:0006091 generation of precursor metabolites and energy; GO:0008152 metabolic process; GO:0009060 aerobic respiration; GO:0009314 response to radiation; GO:0009416 response to light stimulus; GO:0009628 response to abiotic stimulus; GO:0009987 cellular process; GO:0015980 energy derivation by oxidation of organic compounds; GO:0019646 aerobic electron transport chain; GO:0022900 electron transp…	GO:0005622 intracellular; GO:0005623 cell; GO:0005737 cytoplasm; GO:0005739 mitochondrion; GO:0009507 chloroplast; GO:0009532 plastid stroma; GO:0009536 plastid; GO:0009570 chloroplast stroma; GO:0010287 plastoglobule; GO:0043226 organelle; GO:0043227 membrane-bounded organelle; GO:0043229 intracellular organelle; GO:0043231 intracellular membrane-bounded organelle; GO:0044422 organelle part; GO:…	GO:0003824 catalytic activity; GO:0016491 oxidoreductase activity;				PF07859	alpha/beta hydrolase fold	C	KOG2495	NADH-dehydrogenase (ubiquinone)	F2DNM8	A0A287E5H0	0.696417
Cluster3	A0A287DVG9	Thioredoxin domain-containing protein OS=Hordeum vulgare subsp. vulgare OX=112509 PE=4 SV=1	---	0.784	0.779	0.761	0.606	0.562	0.539	1.204	1.267	1.207	1.404	1.42	1.467	1.583	1.85502e-05	0.735	0.00094358	2.514	1.74433e-05	1.167	0.00188484	chloroplast	GO:0000103 sulfate assimilation; GO:0006790 sulfur compound metabolic process; GO:0008152 metabolic process; GO:0009987 cellular process; GO:0019379 sulfate assimilation, phosphoadenylyl sulfate reduction by phosphoadenylyl-sulfate reductase (thioredoxin); GO:0019419 sulfate reduction; GO:0044237 cellular metabolic process; GO:0055114 oxidation-reduction process;	GO:0005622 intracellular; GO:0005623 cell; GO:0005737 cytoplasm; GO:0009507 chloroplast; GO:0009532 plastid stroma; GO:0009536 plastid; GO:0009570 chloroplast stroma; GO:0043226 organelle; GO:0043227 membrane-bounded organelle; GO:0043229 intracellular organelle; GO:0043231 intracellular membrane-bounded organelle; GO:0044422 organelle part; GO:0044424 intracellular part; GO:0044434 chloroplast p…	GO:0003824 catalytic activity; GO:0004604 phosphoadenylyl-sulfate reductase (thioredoxin) activity; GO:0009973 adenylyl-sulfate reductase activity; GO:0016491 oxidoreductase activity; GO:0016667 oxidoreductase activity, acting on a sulfur group of donors; GO:0016671 oxidoreductase activity, acting on a sulfur group of donors, disulfide as acceptor;	K05907	APR; adenylyl-sulfate reductase (glutathione) [EC:1.8.4.9]	osa00920 Sulfur metabolism - Oryza sativa japonica (Japanese rice) (RefSeq); osa01100 Metabolic pathways - Oryza sativa japonica (Japanese rice) (RefSeq);	PF00085	Thioredoxin	EO	KOG0191	Thioredoxin/protein disulfide isomerase	F2D5Z0	A0A287DVG9	0.481312
Cluster4	S4Z202	30S ribosomal protein S19, chloroplastic OS=Hordeum vulgare subsp. vulgare OX=112509 GN=rps19 PE=3 SV=1	rps19	1.331	1.447	1.138	1.111	1.136	1.185	0.862	0.894	0.741	0.77	0.746	0.638	0.638	0.0078575	0.876	0.155481	0.628	0.0015572	0.863	0.144779	cytoplasm	GO:0000028 ribosomal small subunit assembly; GO:0006996 organelle organization; GO:0009987 cellular process; GO:0016043 cellular component organization; GO:0022607 cellular component assembly; GO:0022613 ribonucleoprotein complex biogenesis; GO:0022618 ribonucleoprotein complex assembly; GO:0034622 cellular macromolecular complex assembly; GO:0042254 ribosome biogenesis; GO:0042255 ribosome assem…	GO:0000313 organellar ribosome; GO:0000314 organellar small ribosomal subunit; GO:0005622 intracellular; GO:0005623 cell; GO:0005737 cytoplasm; GO:0005739 mitochondrion; GO:0005759 mitochondrial matrix; GO:0005761 mitochondrial ribosome; GO:0005763 mitochondrial small ribosomal subunit; GO:0005840 ribosome; GO:0009507 chloroplast; GO:0009536 plastid; GO:0015935 small ribosomal subunit; GO:0031974…	GO:0003735 structural constituent of ribosome; GO:0005198 structural molecule activity;	K02965	RP-S19, rpsS; small subunit ribosomal protein S19	osa03010 Ribosome - Oryza sativa japonica (Japanese rice) (RefSeq);	PF00203	Ribosomal protein S19	J	KOG0899	Mitochondrial/chloroplast ribosomal protein S19	A0A287PZE8	S4Z202	0.436899
Cluster4	S4YYJ7	NAD(P)H-quinone oxidoreductase subunit K, chloroplastic OS=Hordeum vulgare subsp. vulgare OX=112509 GN=ndhK PE=3 SV=1	ndhK	1.28	1.311	1.247	1.102	0.89	1.11	0.8	0.758	0.768	0.879	0.913	0.942	0.606	2.0514e-05	0.808	0.042055	0.881	0.18114	1.175	0.0033154	nucleus		GO:0005622 intracellular; GO:0005623 cell; GO:0005737 cytoplasm; GO:0009507 chloroplast; GO:0009536 plastid; GO:0043226 organelle; GO:0043227 membrane-bounded organelle; GO:0043229 intracellular organelle; GO:0043231 intracellular membrane-bounded organelle; GO:0044424 intracellular part; GO:0044444 cytoplasmic part; GO:0044464 cell part;		K05582	ndhK; NAD(P)H-quinone oxidoreductase subunit K [EC:1.6.5.3]	osa00190 Oxidative phosphorylation - Oryza sativa japonica (Japanese rice) (RefSeq); osa01100 Metabolic pathways - Oryza sativa japonica (Japanese rice) (RefSeq);			C	KOG1687	NADH-ubiquinone oxidoreductase, NUFS7/PSST/20 kDa subunit	A0A287T5W3	S4YYJ7	0.463796
Cluster4	M0Z9D1	Peroxidase OS=Hordeum vulgare subsp. vulgare OX=112509 PE=3 SV=1	---	1.346	1.276	1.254	1.112	1.17	1.071	0.86	0.854	0.816	0.722	0.78	0.74	0.653	9.6433e-05	0.865	0.0120969	0.669	0.00030083	0.886	0.0125751	chloroplast				K00430	E1.11.1.7; peroxidase [EC:1.11.1.7]	osa00940 Phenylpropanoid biosynthesis - Oryza sativa japonica (Japanese rice) (RefSeq); osa01100 Metabolic pathways - Oryza sativa japonica (Japanese rice) (RefSeq); osa01110 Biosynthesis of secondary metabolites - Oryza sativa japonica (Japanese rice) (RefSeq);	PF00141	Peroxidase				A0A287H1S6	M0Z9D1	0.523509
Cluster4	M0YNU2	Lipoxygenase OS=Hordeum vulgare subsp. vulgare OX=112509 PE=3 SV=1	---	1.206	1.191	1.19	1.221	1.254	1.174	0.833	0.834	0.836	0.734	0.762	0.763	0.698	6.9876e-8	1.017	0.4405	0.619	3.5599e-05	0.903	0.0150556	chloroplast				K15718	LOX1_5; linoleate 9S-lipoxygenase [EC:1.13.11.58]	osa00591 Linoleic acid metabolism - Oryza sativa japonica (Japanese rice) (RefSeq);	PF00305	Lipoxygenase				A0A287XMI9	M0YNU2	0.38916
Cluster4	M0YMB3	Auxin transport protein like(predicted) OS=Hordeum vulgare subsp. vulgare OX=112509 PE=4 SV=1	---	1.356	1.169	1.225	1.273	1.111	1.206	0.714	0.702	0.769	0.871	0.727	0.877	0.583	0.00048416	0.957	0.50456	0.689	0.0068834	1.133	0.145643	chloroplast												F2CWX3	M0YMB3	0.469096
Cluster4	M0YET8	NmrA domain-containing protein OS=Hordeum vulgare subsp. vulgare OX=112509 PE=4 SV=1	---	1.443	1.444	1.406	0.97	0.986	0.968	0.842	0.769	0.824	0.787	0.752	0.809	0.567	3.9327e-05	0.681	1.6913e-06	0.803	0.00057618	0.964	0.3566	cytoplasm	GO:0006950 response to stress; GO:0007154 cell communication; GO:0009267 cellular response to starvation; GO:0009605 response to external stimulus; GO:0009987 cellular process; GO:0009991 response to extracellular stimulus; GO:0010438 cellular response to sulfur starvation; GO:0031667 response to nutrient levels; GO:0031668 cellular response to extracellular stimulus; GO:0031669 cellular response…	GO:0005622 intracellular; GO:0005623 cell; GO:0005737 cytoplasm; GO:0044424 intracellular part; GO:0044464 cell part;	GO:0000166 nucleotide binding; GO:0005488 binding; GO:0036094 small molecule binding; GO:0043167 ion binding; GO:0043168 anion binding; GO:0048037 cofactor binding; GO:0050661 NADP binding; GO:0050662 coenzyme binding; GO:0070402 NADPH binding; GO:0097159 organic cyclic compound binding; GO:1901265 nucleoside phosphate binding; GO:1901363 heterocyclic compound binding;									A0A287GFX8	M0YET8	0.477623
Cluster4	M0XXR9	Glutathione S-transferase(predicted) OS=Hordeum vulgare subsp. vulgare OX=112509 PE=3 SV=1	---	1.413	1.472	1.407	1.346	1.438	1.287	0.527	0.534	0.571	0.632	0.708	0.664	0.38	2.3099e-06	0.949	0.20278	0.492	0.000101897	1.228	0.007636	nucleus				K00799	GST, gst; glutathione S-transferase [EC:2.5.1.18]	osa00480 Glutathione metabolism - Oryza sativa japonica (Japanese rice) (RefSeq); osa01100 Metabolic pathways - Oryza sativa japonica (Japanese rice) (RefSeq);	PF02798; PF00043	Glutathione S-transferase, N-terminal domain; Glutathione S-transferase, C-terminal domain	O	KOG0867	Glutathione S-transferase	A0A287V018	M0XXR9	0.486437
Cluster4	M0WSH7	Pectinesterase OS=Hordeum vulgare subsp. vulgare OX=112509 PE=4 SV=1	---	1.4	1.343	1.338	0.974	1.082	1.118	0.812	0.847	0.844	0.713	0.769	0.759	0.613	1.80426e-05	0.778	0.0045629	0.706	0.00189882	0.895	0.0146803	cytoplasm							PF04043	Plant invertase/pectin methylesterase inhibitor				A0A287MI89	M0WSH7	0.513738
Cluster4	M0VXX9	Light-harvesting complex-like protein OHP2, chloroplastic(predicted) OS=Hordeum vulgare subsp. vulgare OX=112509 PE=4 SV=1	---	1.191	1.213	1.202	1.247	1.151	0.979	0.679	0.784	0.728	1.019	0.926	0.882	0.608	0.0069372	0.936	0.4269	0.837	0.102783	1.29	0.0127186	chloroplast	GO:0009314 response to radiation; GO:0009416 response to light stimulus; GO:0009628 response to abiotic stimulus; GO:0009642 response to light intensity; GO:0050896 response to stimulus;	GO:0005622 intracellular; GO:0005623 cell; GO:0005737 cytoplasm; GO:0009507 chloroplast; GO:0009534 chloroplast thylakoid; GO:0009535 chloroplast thylakoid membrane; GO:0009536 plastid; GO:0009579 thylakoid; GO:0016020 membrane; GO:0031976 plastid thylakoid; GO:0031984 organelle subcompartment; GO:0034357 photosynthetic membrane; GO:0042651 thylakoid membrane; GO:0043226 organelle; GO:0043227 mem…										A0A287ENK2	M0VXX9	0.393116
Cluster4	M0VG34	TPR_REGION domain-containing protein OS=Hordeum vulgare subsp. vulgare OX=112509 PE=4 SV=1	---	1.057	1.205	1.291	1.479	1.038	1.251	0.718	0.742	0.802	1.008	0.962	0.447	0.637	0.002602	1.061	0.6833	0.641	0.154141	1.069	0.98726	chloroplast		GO:0005622 intracellular; GO:0005623 cell; GO:0005737 cytoplasm; GO:0009507 chloroplast; GO:0009534 chloroplast thylakoid; GO:0009535 chloroplast thylakoid membrane; GO:0009536 plastid; GO:0009579 thylakoid; GO:0016020 membrane; GO:0031976 plastid thylakoid; GO:0031984 organelle subcompartment; GO:0034357 photosynthetic membrane; GO:0042651 thylakoid membrane; GO:0043226 organelle; GO:0043227 mem…										A0A287VYW6	M0VG34	0.314251
Cluster4	M0UMD3	Indole-3-glycerol phosphate lyase (Fragment)(predicted) OS=Hordeum vulgare subsp. vulgare OX=112509 PE=3 SV=1	---	1.313	1.221	1.222	1.156	1.139	1.167	0.758	0.775	0.765	0.794	0.847	0.841	0.612	3.9618e-05	0.922	0.032078	0.717	0.000101973	1.08	0.023283	chloroplast	GO:0000162 tryptophan biosynthetic process; GO:0006082 organic acid metabolic process; GO:0006520 cellular amino acid metabolic process; GO:0006568 tryptophan metabolic process; GO:0006576 cellular biogenic amine metabolic process; GO:0006586 indolalkylamine metabolic process; GO:0006725 cellular aromatic compound metabolic process; GO:0006807 nitrogen compound metabolic process; GO:0006950 respo…	GO:0005622 intracellular; GO:0005623 cell; GO:0005737 cytoplasm; GO:0009507 chloroplast; GO:0009532 plastid stroma; GO:0009536 plastid; GO:0009570 chloroplast stroma; GO:0043226 organelle; GO:0043227 membrane-bounded organelle; GO:0043229 intracellular organelle; GO:0043231 intracellular membrane-bounded organelle; GO:0044422 organelle part; GO:0044424 intracellular part; GO:0044434 chloroplast p…	GO:0003824 catalytic activity; GO:0004834 tryptophan synthase activity; GO:0016829 lyase activity; GO:0016830 carbon-carbon lyase activity; GO:0016832 aldehyde-lyase activity; GO:0016835 carbon-oxygen lyase activity; GO:0016836 hydro-lyase activity; GO:0033984 indole-3-glycerol-phosphate lyase activity;	K13222	BX1, IGL; indole-3-glycerol-phosphate lyase [EC:4.1.2.8]	osa01100 Metabolic pathways - Oryza sativa japonica (Japanese rice) (RefSeq);	PF00290	Tryptophan synthase alpha chain	E	KOG4175	Tryptophan synthase alpha chain	A0A287UZ57	M0UMD3	0.63831
Cluster4	M0UF06	30S ribosomal protein S21(predicted) OS=Hordeum vulgare subsp. vulgare OX=112509 PE=4 SV=1	---	1.244	1.15	1.339	1.168	0.969	1.187	0.795	0.748	0.789	0.905	0.806	0.902	0.625	0.00061597	0.89	0.20664	0.786	0.034362	1.12	0.057358	chloroplast												A0A287PWE6	M0UF06	0.495284
Cluster4	F2DNC4	Predicted protein OS=Hordeum vulgare subsp. vulgare OX=112509 PE=2 SV=1	---	1.404	1.508	1.598	0.917	0.662	0.711	0.824	0.873	0.739	0.861	0.96	0.942	0.54	0.00055841	0.508	0.002902	1.207	0.132783	1.134	0.098419	chloroplast									O	KOG0552	FKBP-type peptidyl-prolyl cis-trans isomerase	A0A287LB74	F2DNC4	0.273451
Cluster4	F2DEI9	Predicted protein OS=Hordeum vulgare subsp. vulgare OX=112509 PE=2 SV=1	---	1.313	1.222	1.2	1.082	1.134	1.256	0.717	0.868	0.921	0.697	0.727	0.863	0.671	0.0073616	0.93	0.22592	0.659	0.0059626	0.913	0.41752	chloroplast							PF04863; PF04864	Alliinase EGF-like domain; Allinase				M0UFC7	F2DEI9	0.425663
Cluster4	F2CRC1	Chlorophyll a-b binding protein, chloroplastic OS=Hordeum vulgare subsp. vulgare OX=112509 PE=2 SV=1	---	1.205	1.253	1.26	1.318	1.264	1.247	0.758	0.771	0.761	0.702	0.721	0.741	0.616	2.7046e-06	1.03	0.2495	0.565	1.76113e-05	0.945	0.025881	chloroplast				K08910	LHCA4; light-harvesting complex I chlorophyll a/b binding protein 4	osa00196 Photosynthesis - antenna proteins - Oryza sativa japonica (Japanese rice) (RefSeq); osa01100 Metabolic pathways - Oryza sativa japonica (Japanese rice) (RefSeq);						A0A287KHA5	F2CRC1	0.434795
Cluster4	A0A287Y0I9	Sucrose synthase OS=Hordeum vulgare subsp. vulgare OX=112509 PE=3 SV=1	---	1.294	1.609	1.552	1.428	1.106	1.473	0.505	0.646	0.559	0.522	0.734	0.573	0.384	0.00061939	0.899	0.38764	0.456	0.004477	1.07	0.64484	cytoplasm				K00695	E2.4.1.13; sucrose synthase [EC:2.4.1.13]	osa00500 Starch and sucrose metabolism - Oryza sativa japonica (Japanese rice) (RefSeq); osa01100 Metabolic pathways - Oryza sativa japonica (Japanese rice) (RefSeq);			M	KOG0853	Glycosyltransferase	A0A287LZW5	A0A287Y0I9	0.529839
Cluster4	A0A287WM51	Chlorophyll a-b binding protein, chloroplastic OS=Hordeum vulgare subsp. vulgare OX=112509 PE=3 SV=1	---	1.225	1.354	1.232	1.107	1.024	1.02	0.814	0.818	0.754	0.922	0.922	0.809	0.626	0.00036185	0.827	0.0106637	0.842	0.027536	1.112	0.108578	chloroplast				K08912	LHCB1; light-harvesting complex II chlorophyll a/b binding protein 1	osa00196 Photosynthesis - antenna proteins - Oryza sativa japonica (Japanese rice) (RefSeq); osa01100 Metabolic pathways - Oryza sativa japonica (Japanese rice) (RefSeq);						M0UW32	A0A287WM51	0.517456
Cluster4	A0A287W6L1	SOUL heme-binding protein(predicted) OS=Hordeum vulgare subsp. vulgare OX=112509 PE=4 SV=1	---	1.354	1.329	1.262	1.488	0.825	1.598	0.709	0.715	0.688	0.662	0.698	0.672	0.535	1.65585e-05	0.991	0.8383	0.52	0.099725	0.962	0.119584	chloroplast												A0A287PUD3	A0A287W6L1	0.40969
Cluster4	A0A287VRA9	Putative UPF0481 protein(predicted) OS=Hordeum vulgare subsp. vulgare OX=112509 PE=4 SV=1	---	1.261	1.333	1.491	1.29	1.142	1.394	0.724	0.651	0.574	0.81	0.613	0.717	0.477	0.00087783	0.937	0.43236	0.559	0.0041817	1.098	0.43228	cytoplasm												A0A287HJI7	A0A287VRA9	0.491289
Cluster4	A0A287VMY6	Expressed protein(predicted) OS=Hordeum vulgare subsp. vulgare OX=112509 PE=4 SV=1	---	1.296	1.269	1.23	1.191	1.109	1.114	0.742	0.697	0.761	0.866	0.862	0.862	0.58	5.7592e-05	0.9	0.0184204	0.759	0.0069587	1.177	0.02454	chloroplast	GO:0000018 regulation of DNA recombination; GO:0006139 nucleobase-containing compound metabolic process; GO:0006259 DNA metabolic process; GO:0006281 DNA repair; GO:0006355 regulation of transcription, DNA-templated; GO:0006725 cellular aromatic compound metabolic process; GO:0006807 nitrogen compound metabolic process; GO:0006950 response to stress; GO:0006952 defense response; GO:0006974 cellul…	GO:0000229 cytoplasmic chromosome; GO:0005622 intracellular; GO:0005623 cell; GO:0005694 chromosome; GO:0005737 cytoplasm; GO:0009295 nucleoid; GO:0009507 chloroplast; GO:0009508 plastid chromosome; GO:0009532 plastid stroma; GO:0009536 plastid; GO:0009570 chloroplast stroma; GO:0042646 plastid nucleoid; GO:0043226 organelle; GO:0043227 membrane-bounded organelle; GO:0043228 non-membrane-bounded …	GO:0003676 nucleic acid binding; GO:0003677 DNA binding; GO:0003697 single-stranded DNA binding; GO:0003700 transcription factor activity, sequence-specific DNA binding; GO:0003723 RNA binding; GO:0003729 mRNA binding; GO:0005488 binding; GO:0042162 telomeric DNA binding; GO:0043565 sequence-specific DNA binding; GO:0097159 organic cyclic compound binding; GO:1901363 heterocyclic compound binding;				PF08536	Whirly transcription factor				A0A287M1N6	A0A287VMY6	0.539069
Cluster4	A0A287UR13	Photosynthetic NDH subunit of subcomplex B 4 chloroplastic(predicted) OS=Hordeum vulgare subsp. vulgare OX=112509 PE=4 SV=1	---	1.358	1.265	1.176	1.147	1.185	1.136	0.616	0.757	0.902	0.785	0.916	0.758	0.599	0.0113218	0.913	0.108257	0.709	0.0043181	1.081	0.52632	chloroplast	GO:0006091 generation of precursor metabolites and energy; GO:0008152 metabolic process; GO:0009767 photosynthetic electron transport chain; GO:0009773 photosynthetic electron transport in photosystem I; GO:0009987 cellular process; GO:0015979 photosynthesis; GO:0019684 photosynthesis, light reaction; GO:0022900 electron transport chain; GO:0044237 cellular metabolic process; GO:0055114 oxidation…	GO:0005622 intracellular; GO:0005623 cell; GO:0005737 cytoplasm; GO:0009507 chloroplast; GO:0009534 chloroplast thylakoid; GO:0009535 chloroplast thylakoid membrane; GO:0009536 plastid; GO:0009579 thylakoid; GO:0010598 NAD(P)H dehydrogenase complex (plastoquinone); GO:0016020 membrane; GO:0031976 plastid thylakoid; GO:0031984 organelle subcompartment; GO:0032991 macromolecular complex; GO:0034357…										F2DGW2	A0A287UR13	0.457645
Cluster4	A0A287TMY0	Ubiquitin1(predicted) OS=Hordeum vulgare subsp. vulgare OX=112509 PE=4 SV=1	---	2.162	2.022	2.126	1.366	1.05	0.764	0.304	0.399	0.474	0.46	0.454	0.418	0.187	0.0059029	0.504	0.052005	0.419	0.0078028	1.132	0.35344	cytoplasm				K08770	UBC; ubiquitin C		PF00240	Ubiquitin family	O	KOG0001	Ubiquitin and ubiquitin-like proteins	M0YMY2	A0A287TMY0	0.569068
Cluster4	A0A287T8X6	NAD(P)-bd_dom domain-containing protein OS=Hordeum vulgare subsp. vulgare OX=112509 PE=4 SV=1	---	1.244	1.34	1.228	0.891	1.11	1.014	0.762	0.845	0.79	0.994	0.962	0.82	0.629	0.00033886	0.791	0.026519	0.921	0.40008	1.158	0.096679	chloroplast							PF13460	NADH(P)-binding				A0A287G734	A0A287T8X6	0.418073
Cluster4	A0A287SXP4	Amino_oxidase domain-containing protein OS=Hordeum vulgare subsp. vulgare OX=112509 PE=4 SV=1	---	1.21	1.236	1.26	1.174	1.221	1.181	0.815	0.803	0.838	0.784	0.71	0.768	0.663	1.88916e-05	0.965	0.102204	0.633	0.000143819	0.921	0.063981	endoplasmic reticulum							PF01593	Flavin containing amine oxidoreductase	H	KOG4254	Phytoene desaturase	A0A287J9G3	A0A287SXP4	0.515958
Cluster4	A0A287SHI7	Photosystem I reaction center subunit III, chloroplastic(predicted) OS=Hordeum vulgare subsp. vulgare OX=112509 PE=4 SV=1	---	1.271	1.248	1.199	1.136	1.131	1.201	0.803	0.843	0.828	0.789	0.756	0.797	0.665	5.6514e-05	0.933	0.054535	0.675	9.9689e-05	0.947	0.06332	mitochondria		GO:0005622 intracellular; GO:0005623 cell; GO:0005737 cytoplasm; GO:0009507 chloroplast; GO:0009534 chloroplast thylakoid; GO:0009536 plastid; GO:0009543 chloroplast thylakoid lumen; GO:0009579 thylakoid; GO:0031976 plastid thylakoid; GO:0031977 thylakoid lumen; GO:0031978 plastid thylakoid lumen; GO:0031984 organelle subcompartment; GO:0043226 organelle; GO:0043227 membrane-bounded organelle; GO…		K02694	psaF; photosystem I subunit III	osa00195 Photosynthesis - Oryza sativa japonica (Japanese rice) (RefSeq); osa01100 Metabolic pathways - Oryza sativa japonica (Japanese rice) (RefSeq);						S4Z0K2	A0A287SHI7	0.62424
Cluster4	A0A287SGW4	HAD superfamily hydrolase, 5'-Nucleotidase containing protein, expressed(predicted) OS=Hordeum vulgare subsp. vulgare OX=112509 PE=4 SV=1	---	1.263	1.298	1.263	1.15	1.244	1.284	0.767	0.815	0.8	0.753	0.703	0.66	0.623	1.96876e-05	0.962	0.30568	0.575	0.00038306	0.888	0.046859	chloroplast,mitochondria									F	KOG2469	IMP-GMP specific 5'-nucleotidase	A0A287WGI2	A0A287SGW4	0.484231
Cluster4	A0A287SCI5	Beta-D-glucan exohydrolase, isoenzyme ExoII(predicted) OS=Hordeum vulgare subsp. vulgare OX=112509 PE=4 SV=1	---	1.309	1.308	1.332	0.867	0.891	0.865	0.96	0.987	0.997	0.81	0.859	0.816	0.746	2.0578e-05	0.664	1.6821e-06	0.947	0.0592	0.844	0.00143605	chloroplast	GO:0000272 polysaccharide catabolic process; GO:0005975 carbohydrate metabolic process; GO:0005976 polysaccharide metabolic process; GO:0008152 metabolic process; GO:0009056 catabolic process; GO:0009057 macromolecule catabolic process; GO:0009251 glucan catabolic process; GO:0016052 carbohydrate catabolic process; GO:0043170 macromolecule metabolic process; GO:0044042 glucan metabolic process; G…	GO:0005623 cell; GO:0005886 plasma membrane; GO:0016020 membrane; GO:0042597 periplasmic space; GO:0044464 cell part; GO:0071944 cell periphery;	GO:0003824 catalytic activity; GO:0004553 hydrolase activity, hydrolyzing O-glycosyl compounds; GO:0008422 beta-glucosidase activity; GO:0015926 glucosidase activity; GO:0016787 hydrolase activity; GO:0016798 hydrolase activity, acting on glycosyl bonds;	K05349	bglX; beta-glucosidase [EC:3.2.1.21]	osa00460 Cyanoamino acid metabolism - Oryza sativa japonica (Japanese rice) (RefSeq); osa00500 Starch and sucrose metabolism - Oryza sativa japonica (Japanese rice) (RefSeq); osa00940 Phenylpropanoid biosynthesis - Oryza sativa japonica (Japanese rice) (RefSeq); osa01100 Metabolic pathways - Oryza sativa japonica (Japanese rice) (RefSeq); osa01110 Biosynthesis of secondary metabolites - Oryza sat…	PF00933; PF01915	Glycosyl hydrolase family 3 N terminal domain; Glycosyl hydrolase family 3 C-terminal domain					A0A287SCI5	0.292333
Cluster4	A0A287RSR0	NAD(P)-bd_dom domain-containing protein OS=Hordeum vulgare subsp. vulgare OX=112509 PE=4 SV=1	---	1.314	1.279	1.277	1.188	1.204	1.154	0.78	0.766	0.758	0.766	0.752	0.761	0.595	1.0026e-06	0.916	0.0049387	0.643	2.6997e-06	0.989	0.33598	chloroplast		GO:0005622 intracellular; GO:0005623 cell; GO:0005737 cytoplasm; GO:0009507 chloroplast; GO:0009526 plastid envelope; GO:0009534 chloroplast thylakoid; GO:0009535 chloroplast thylakoid membrane; GO:0009536 plastid; GO:0009579 thylakoid; GO:0009941 chloroplast envelope; GO:0016020 membrane; GO:0031967 organelle envelope; GO:0031975 envelope; GO:0031976 plastid thylakoid; GO:0031984 organelle subco…					PF13460	NADH(P)-binding	G	KOG1203	Predicted dehydrogenase	A0A287HJK1	A0A287RSR0	0.705654
Cluster4	A0A287RJL0	NAD(P)H-quinone oxidoreductase subunit 1, chloroplastic(predicted) OS=Hordeum vulgare subsp. vulgare OX=112509 PE=3 SV=1	---	1.229	1.31	1.373	1.188	1.113	1.213	0.674	0.996	0.685	0.735	0.703	0.783	0.602	0.0164188	0.898	0.060581	0.632	0.00034448	0.943	0.7615	vacuolar membrane	GO:0006091 generation of precursor metabolites and energy; GO:0008152 metabolic process; GO:0009987 cellular process; GO:0015979 photosynthesis; GO:0015980 energy derivation by oxidation of organic compounds; GO:0044237 cellular metabolic process; GO:0045333 cellular respiration; GO:0055114 oxidation-reduction process;	GO:0005622 intracellular; GO:0005623 cell; GO:0005737 cytoplasm; GO:0005739 mitochondrion; GO:0005740 mitochondrial envelope; GO:0005743 mitochondrial inner membrane; GO:0005746 mitochondrial respiratory chain; GO:0005747 mitochondrial respiratory chain complex I; GO:0009507 chloroplast; GO:0009536 plastid; GO:0016020 membrane; GO:0019866 organelle inner membrane; GO:0030964 NADH dehydrogenase co…	GO:0003824 catalytic activity; GO:0016491 oxidoreductase activity; GO:0016651 oxidoreductase activity, acting on NAD(P)H;	K05572	ndhA; NAD(P)H-quinone oxidoreductase subunit 1 [EC:1.6.5.3]	osa00190 Oxidative phosphorylation - Oryza sativa japonica (Japanese rice) (RefSeq); osa01100 Metabolic pathways - Oryza sativa japonica (Japanese rice) (RefSeq);			C	KOG4770	NADH dehydrogenase subunit 1	A0A287TEE6	A0A287RJL0	0.46983
Cluster4	A0A287RGX3	Chlorophyll a-b binding protein, chloroplastic OS=Hordeum vulgare subsp. vulgare OX=112509 PE=3 SV=1	---	1.303	1.293	1.205	1.248	1.029	1.168	0.78	0.766	0.771	0.837	0.839	0.761	0.61	4.0653e-05	0.906	0.178057	0.707	0.0061446	1.052	0.20318	mitochondria	GO:0006091 generation of precursor metabolites and energy; GO:0008152 metabolic process; GO:0009314 response to radiation; GO:0009416 response to light stimulus; GO:0009628 response to abiotic stimulus; GO:0009637 response to blue light; GO:0009639 response to red or far red light; GO:0009765 photosynthesis, light harvesting; GO:0009768 photosynthesis, light harvesting in photosystem I; GO:000998…	GO:0005622 intracellular; GO:0005623 cell; GO:0005737 cytoplasm; GO:0009507 chloroplast; GO:0009526 plastid envelope; GO:0009532 plastid stroma; GO:0009534 chloroplast thylakoid; GO:0009535 chloroplast thylakoid membrane; GO:0009536 plastid; GO:0009570 chloroplast stroma; GO:0009579 thylakoid; GO:0009941 chloroplast envelope; GO:0010287 plastoglobule; GO:0016020 membrane; GO:0031967 organelle env…	GO:0005488 binding; GO:0016168 chlorophyll binding; GO:0031409 pigment binding; GO:0043167 ion binding; GO:0043168 anion binding; GO:0046906 tetrapyrrole binding; GO:0048037 cofactor binding; GO:0097159 organic cyclic compound binding; GO:1901363 heterocyclic compound binding;	K08908	LHCA2; light-harvesting complex I chlorophyll a/b binding protein 2	osa00196 Photosynthesis - antenna proteins - Oryza sativa japonica (Japanese rice) (RefSeq); osa01100 Metabolic pathways - Oryza sativa japonica (Japanese rice) (RefSeq);						F2CWI6	A0A287RGX3	0.595091
Cluster4	A0A287QXL1	DUF3700 domain-containing protein OS=Hordeum vulgare subsp. vulgare OX=112509 PE=4 SV=1	---	1.217	1.364	1.403	0.78	0.92	0.905	1.036	0.942	0.9	0.923	0.793	0.818	0.722	0.0056553	0.654	0.0033557	0.973	0.71842	0.88	0.109035	cytoplasm							PF12481	Aluminium induced protein					A0A287QXL1	0.286751
Cluster4	A0A287QRB3	Dicarboxylate transporter 1, chloroplastic(predicted) OS=Hordeum vulgare subsp. vulgare OX=112509 PE=4 SV=1	---	1.27	1.208	1.146	1.181	1.107	1.249	0.707	0.752	0.878	0.841	0.841	0.82	0.645	0.0033787	0.976	0.61906	0.707	0.00065667	1.071	0.38138	chloroplast	GO:0006082 organic acid metabolic process; GO:0006520 cellular amino acid metabolic process; GO:0006536 glutamate metabolic process; GO:0006541 glutamine metabolic process; GO:0006807 nitrogen compound metabolic process; GO:0006810 transport; GO:0006811 ion transport; GO:0006820 anion transport; GO:0006835 dicarboxylic acid transport; GO:0008152 metabolic process; GO:0009064 glutamine family amin…	GO:0005622 intracellular; GO:0005623 cell; GO:0005737 cytoplasm; GO:0005739 mitochondrion; GO:0009507 chloroplast; GO:0009526 plastid envelope; GO:0009534 chloroplast thylakoid; GO:0009536 plastid; GO:0009579 thylakoid; GO:0009941 chloroplast envelope; GO:0016020 membrane; GO:0031967 organelle envelope; GO:0031975 envelope; GO:0031976 plastid thylakoid; GO:0031984 organelle subcompartment; GO:004…	GO:0005215 transporter activity; GO:0005310 dicarboxylic acid transmembrane transporter activity; GO:0005342 organic acid transmembrane transporter activity; GO:0008509 anion transmembrane transporter activity; GO:0008514 organic anion transmembrane transporter activity; GO:0015075 ion transmembrane transporter activity; GO:0015131 oxaloacetate transmembrane transporter activity; GO:0015139 alpha…									A0A287GNF7	A0A287QRB3	0.470041
Cluster4	A0A287PV82	Glutathione S-transferase GSTF14 (Fragment)(predicted) OS=Hordeum vulgare subsp. vulgare OX=112509 PE=3 SV=1	---	1.499	1.422	1.491	1.382	1.321	1.415	0.533	0.526	0.534	0.629	0.593	0.656	0.361	2.5614e-7	0.933	0.057884	0.456	2.2416e-05	1.179	0.0052591	chloroplast				K00799	GST, gst; glutathione S-transferase [EC:2.5.1.18]	osa00480 Glutathione metabolism - Oryza sativa japonica (Japanese rice) (RefSeq); osa01100 Metabolic pathways - Oryza sativa japonica (Japanese rice) (RefSeq);	PF02798; PF00043	Glutathione S-transferase, N-terminal domain; Glutathione S-transferase, C-terminal domain	O	KOG0867	Glutathione S-transferase	M0UF06	A0A287PV82	0.55787
Cluster4	A0A287PUC3	Glutathione S-transferase 6, chloroplastic(predicted) OS=Hordeum vulgare subsp. vulgare OX=112509 PE=3 SV=1	---	1.444	1.515	1.499	1.212	1.244	1.236	0.655	0.588	0.597	0.647	0.675	0.689	0.413	1.87665e-05	0.828	0.00033913	0.545	3.5667e-06	1.093	0.080181	nucleus				K00799	GST, gst; glutathione S-transferase [EC:2.5.1.18]	osa00480 Glutathione metabolism - Oryza sativa japonica (Japanese rice) (RefSeq); osa01100 Metabolic pathways - Oryza sativa japonica (Japanese rice) (RefSeq);	PF13417; PF00043	Glutathione S-transferase, N-terminal domain; Glutathione S-transferase, C-terminal domain	O	KOG0867	Glutathione S-transferase	A0A287EDY9	A0A287PUC3	0.685633
Cluster4	A0A287PI54	Fn3_like domain-containing protein OS=Hordeum vulgare subsp. vulgare OX=112509 PE=4 SV=1	---	1.479	1.415	1.454	0.817	0.839	0.844	0.932	0.907	0.93	0.788	0.758	0.838	0.637	4.2114e-06	0.575	2.2482e-06	0.954	0.192998	0.861	0.007839	chloroplast							PF00933; PF01915	Glycosyl hydrolase family 3 N terminal domain; Glycosyl hydrolase family 3 C-terminal domain				M0UMD3	A0A287PI54	0.3122
Cluster4	A0A287NRS7	Inositol-1-monophosphatase OS=Hordeum vulgare subsp. vulgare OX=112509 PE=3 SV=1	---	1.413	1.387	1.187	0.956	1.086	0.727	0.784	0.832	0.616	1.019	1.065	0.928	0.56	0.0054781	0.695	0.045385	1.088	0.48528	1.349	0.038083	cytoplasm	GO:0005975 carbohydrate metabolic process; GO:0005996 monosaccharide metabolic process; GO:0006020 inositol metabolic process; GO:0006021 inositol biosynthetic process; GO:0006066 alcohol metabolic process; GO:0006082 organic acid metabolic process; GO:0006732 coenzyme metabolic process; GO:0006766 vitamin metabolic process; GO:0006767 water-soluble vitamin metabolic process; GO:0006793 phosphoru…	GO:0005622 intracellular; GO:0005623 cell; GO:0005737 cytoplasm; GO:0005829 cytosol; GO:0005886 plasma membrane; GO:0016020 membrane; GO:0044424 intracellular part; GO:0044444 cytoplasmic part; GO:0044464 cell part; GO:0071944 cell periphery;	GO:0000287 magnesium ion binding; GO:0003824 catalytic activity; GO:0005488 binding; GO:0008934 inositol monophosphate 1-phosphatase activity; GO:0010347 L-galactose-1-phosphate phosphatase activity; GO:0016787 hydrolase activity; GO:0016788 hydrolase activity, acting on ester bonds; GO:0016791 phosphatase activity; GO:0019203 carbohydrate phosphatase activity; GO:0042578 phosphoric ester hydrola…	K10047	VTC4; inositol-phosphate phosphatase / L-galactose 1-phosphate phosphatase [EC:3.1.3.25 3.1.3.93]	osa00053 Ascorbate and aldarate metabolism - Oryza sativa japonica (Japanese rice) (RefSeq); osa00562 Inositol phosphate metabolism - Oryza sativa japonica (Japanese rice) (RefSeq); osa01100 Metabolic pathways - Oryza sativa japonica (Japanese rice) (RefSeq); osa01110 Biosynthesis of secondary metabolites - Oryza sativa japonica (Japanese rice) (RefSeq); osa04070 Phosphatidylinositol signaling sy…			G	KOG2951	Inositol monophosphatase	A0A287UR13	A0A287NRS7	0.310727
Cluster4	A0A287N2I1	PAP_fibrillin domain-containing protein OS=Hordeum vulgare subsp. vulgare OX=112509 PE=4 SV=1	---	1.236	1.227	1.28	1.243	1.285	1.267	0.771	0.742	0.756	0.743	0.739	0.71	0.606	4.0672e-06	1.014	0.44046	0.578	2.9147e-06	0.966	0.128556	chloroplast		GO:0005622 intracellular; GO:0005623 cell; GO:0005737 cytoplasm; GO:0009507 chloroplast; GO:0009532 plastid stroma; GO:0009534 chloroplast thylakoid; GO:0009535 chloroplast thylakoid membrane; GO:0009536 plastid; GO:0009570 chloroplast stroma; GO:0009579 thylakoid; GO:0010287 plastoglobule; GO:0016020 membrane; GO:0031976 plastid thylakoid; GO:0031984 organelle subcompartment; GO:0034357 photosyn…										A0A287VMY6	A0A287N2I1	0.472182
Cluster4	A0A287MD16	Putative mitochondrial import receptor subunit TOM20(predicted) OS=Hordeum vulgare subsp. vulgare OX=112509 PE=4 SV=1	---	1.29	1.115	1.287	1.077	1.059	1.216	0.647	0.638	0.623	0.984	0.922	1.142	0.517	0.000182288	0.908	0.2126	0.909	0.27462	1.597	0.00194321	chloroplast												F2DWH9	A0A287MD16	0.347109
Cluster4	A0A287M953	NAD(P)H-quinone oxidoreductase subunit N, chloroplastic(predicted) OS=Hordeum vulgare subsp. vulgare OX=112509 PE=4 SV=1	---	1.359	1.326	1.348	1.098	1.022	1.128	0.726	0.725	0.725	0.844	0.859	0.838	0.54	0.00013894	0.805	0.0020041	0.782	0.00128315	1.168	0.0022563	mitochondria	GO:0002376 immune system process; GO:0006950 response to stress; GO:0006952 defense response; GO:0006955 immune response; GO:0009605 response to external stimulus; GO:0009607 response to biotic stimulus; GO:0009620 response to fungus; GO:0009814 defense response, incompatible interaction; GO:0009817 defense response to fungus, incompatible interaction; GO:0009987 cellular process; GO:0010257 NADH…	GO:0005622 intracellular; GO:0005623 cell; GO:0005737 cytoplasm; GO:0009507 chloroplast; GO:0009526 plastid envelope; GO:0009534 chloroplast thylakoid; GO:0009535 chloroplast thylakoid membrane; GO:0009536 plastid; GO:0009579 thylakoid; GO:0009941 chloroplast envelope; GO:0010598 NAD(P)H dehydrogenase complex (plastoquinone); GO:0016020 membrane; GO:0031967 organelle envelope; GO:0031975 envelope…										F2DNC4	A0A287M953	0.578186
Cluster4	A0A287M050	Subtilisin-like protease(predicted) OS=Hordeum vulgare subsp. vulgare OX=112509 PE=3 SV=1	---	1.351	1.289	1.359	1.257	1.326	1.222	0.682	0.645	0.778	0.69	0.696	0.705	0.526	0.00037703	0.951	0.161997	0.55	1.86966e-05	0.993	0.95466	chloroplast							PF05922; PF00082	Peptidase inhibitor I9; Subtilase family				A0A287W6L1	A0A287M050	0.567454
Cluster4	A0A287L9G7	tRNA-methyltransferase(predicted) OS=Hordeum vulgare subsp. vulgare OX=112509 PE=4 SV=1	---	1.704	1.239	1.287	1.105	1.135	0.966	0.738	0.615	0.753	0.716	0.813	0.928	0.498	0.0044207	0.758	0.074364	0.766	0.040237	1.167	0.197161	chloroplast												A0A287PUC3	A0A287L9G7	0.460646
Cluster4	A0A287KM84	Peptidyl-prolyl cis-trans isomerase OS=Hordeum vulgare subsp. vulgare OX=112509 PE=3 SV=1	---	1.175	1.221	1.209	0.958	1.128	1.112	0.79	0.751	0.806	0.944	0.959	0.945	0.651	5.8535e-05	0.887	0.084101	0.891	0.163599	1.213	0.00085894	chloroplast		GO:0005622 intracellular; GO:0005623 cell; GO:0005737 cytoplasm; GO:0009507 chloroplast; GO:0009532 plastid stroma; GO:0009536 plastid; GO:0009570 chloroplast stroma; GO:0043226 organelle; GO:0043227 membrane-bounded organelle; GO:0043229 intracellular organelle; GO:0043231 intracellular membrane-bounded organelle; GO:0044422 organelle part; GO:0044424 intracellular part; GO:0044434 chloroplast p…		K03768	PPIB, ppiB; peptidyl-prolyl cis-trans isomerase B (cyclophilin B) [EC:5.2.1.8]		PF00160	Cyclophilin type peptidyl-prolyl cis-trans isomerase/CLD	O	KOG0880	Peptidyl-prolyl cis-trans isomerase	A0A287TEN9	A0A287KM84	0.43033
Cluster4	A0A287JHL3	OSJNBb0059K02.12 protein(predicted) OS=Hordeum vulgare subsp. vulgare OX=112509 PE=4 SV=1	---	1.251	1.306	1.243	1.026	1.058	0.931	0.795	0.925	0.808	1.001	0.887	0.769	0.665	0.00125569	0.793	0.0049977	0.881	0.2006	1.051	0.63408	extracellular	GO:0009987 cellular process; GO:0010190 cytochrome b6f complex assembly; GO:0016043 cellular component organization; GO:0017004 cytochrome complex assembly; GO:0022607 cellular component assembly; GO:0034622 cellular macromolecular complex assembly; GO:0043933 macromolecular complex subunit organization; GO:0044085 cellular component biogenesis; GO:0065003 macromolecular complex assembly; GO:0071…	GO:0005622 intracellular; GO:0005623 cell; GO:0005737 cytoplasm; GO:0009507 chloroplast; GO:0009536 plastid; GO:0043226 organelle; GO:0043227 membrane-bounded organelle; GO:0043229 intracellular organelle; GO:0043231 intracellular membrane-bounded organelle; GO:0044424 intracellular part; GO:0044444 cytoplasmic part; GO:0044464 cell part;										A0A287INW2	A0A287JHL3	0.433699
Cluster4	A0A287JHB0	Asparaginase(predicted) OS=Hordeum vulgare subsp. vulgare OX=112509 PE=4 SV=1	---	1.516	1.323	1.645	0.874	1.04	0.959	0.597	0.636	0.632	0.962	0.972	0.844	0.416	0.000197779	0.641	0.0054036	0.967	0.65028	1.49	0.00133675	cytoplasm				K13051	iaaA, ASRGL1; beta-aspartyl-peptidase (threonine type) [EC:3.4.19.5]	osa00250 Alanine, aspartate and glutamate metabolism - Oryza sativa japonica (Japanese rice) (RefSeq); osa00460 Cyanoamino acid metabolism - Oryza sativa japonica (Japanese rice) (RefSeq); osa01100 Metabolic pathways - Oryza sativa japonica (Japanese rice) (RefSeq); osa01110 Biosynthesis of secondary metabolites - Oryza sativa japonica (Japanese rice) (RefSeq);	PF01112	Asparaginase	E	KOG1592	Asparaginase	M0Y3R7	A0A287JHB0	0.404117
Cluster4	A0A287IBQ1	NAD(P)-bd_dom domain-containing protein OS=Hordeum vulgare subsp. vulgare OX=112509 PE=4 SV=1	---	1.177	1.161	1.233	1.016	1.095	1.27	0.736	0.927	0.715	0.871	0.894	0.905	0.666	0.0079839	0.947	0.4371	0.79	0.025237	1.123	0.27738	cytoplasm							PF13460	NADH(P)-binding	G	KOG1203	Predicted dehydrogenase	A0A287E5I8	A0A287IBQ1	0.4214
Cluster4	A0A287HUJ6	Oxygen-evolving enhancer protein 3-1, chloroplastic(predicted) OS=Hordeum vulgare subsp. vulgare OX=112509 PE=4 SV=1	---	0.943	1.159	1.259	1.072	0.739	1.416	0.602	0.546	0.784	0.885	1.136	1.458	0.575	0.0155437	0.96	0.75874	1.078	0.72604	1.801	0.032378	chloroplast		GO:0005576 extracellular region; GO:0005622 intracellular; GO:0005623 cell; GO:0005737 cytoplasm; GO:0009507 chloroplast; GO:0009532 plastid stroma; GO:0009534 chloroplast thylakoid; GO:0009535 chloroplast thylakoid membrane; GO:0009536 plastid; GO:0009570 chloroplast stroma; GO:0009579 thylakoid; GO:0016020 membrane; GO:0031976 plastid thylakoid; GO:0031977 thylakoid lumen; GO:0031984 organelle …		K01177	E3.2.1.2; beta-amylase [EC:3.2.1.2]	osa00500 Starch and sucrose metabolism - Oryza sativa japonica (Japanese rice) (RefSeq); osa01100 Metabolic pathways - Oryza sativa japonica (Japanese rice) (RefSeq);						A0A287PCW0	A0A287HUJ6	0.252678
Cluster4	A0A287H7K2	Hydroxyproline-rich glycoprotein family protein(predicted) OS=Hordeum vulgare subsp. vulgare OX=112509 PE=4 SV=1	---	1.201	1.174	1.199	1.061	1.156	1.045	0.767	0.792	0.746	0.954	0.976	0.929	0.645	1.99242e-05	0.913	0.045918	0.876	0.0191362	1.24	0.00065704	chloroplast												A0A287QM05	A0A287H7K2	0.426497
Cluster4	A0A287H7K0	Hydroxyproline-rich glycoprotein family protein(predicted) OS=Hordeum vulgare subsp. vulgare OX=112509 PE=4 SV=1	---	1.38	1.275	1.225	0.854	0.845	0.902	0.829	0.869	0.832	1.001	0.992	0.995	0.652	0.00036186	0.67	0.00059537	1.149	0.020837	1.181	0.00041562	chloroplast												A0A287SF72	A0A287H7K0	0.291417
Cluster4	A0A287H1C9	Peptidase A1 domain-containing protein OS=Hordeum vulgare subsp. vulgare OX=112509 PE=3 SV=1	---	1.286	1.209	1.244	1.051	1.149	1.078	0.827	0.766	0.775	0.933	0.842	0.839	0.633	0.000102525	0.877	0.0145027	0.797	0.0065953	1.104	0.080523	chloroplast									O	KOG1339	Aspartyl protease	A0A287S9N1	A0A287H1C9	0.555951
Cluster4	A0A287H1C1	PEROXIDASE_4 domain-containing protein OS=Hordeum vulgare subsp. vulgare OX=112509 PE=3 SV=1	---	1.109	1.556	1.914	1.112	1.064	1.119	0.576	0.664	0.718	0.682	0.753	0.733	0.428	0.00846	0.72	0.196879	0.658	0.00023797	1.107	0.21256	chloroplast	GO:0000302 response to reactive oxygen species; GO:0006950 response to stress; GO:0006979 response to oxidative stress; GO:0008152 metabolic process; GO:0009056 catabolic process; GO:0009636 response to toxic substance; GO:0009987 cellular process; GO:0016999 antibiotic metabolic process; GO:0017001 antibiotic catabolic process; GO:0017144 drug metabolic process; GO:0033554 cellular response to s…	GO:0005622 intracellular; GO:0005623 cell; GO:0005737 cytoplasm; GO:0009507 chloroplast; GO:0009536 plastid; GO:0043226 organelle; GO:0043227 membrane-bounded organelle; GO:0043229 intracellular organelle; GO:0043231 intracellular membrane-bounded organelle; GO:0044424 intracellular part; GO:0044444 cytoplasmic part; GO:0044464 cell part;	GO:0003824 catalytic activity; GO:0004130 cytochrome-c peroxidase activity; GO:0004601 peroxidase activity; GO:0016209 antioxidant activity; GO:0016491 oxidoreductase activity; GO:0016684 oxidoreductase activity, acting on peroxide as acceptor;	K00434	E1.11.1.11; L-ascorbate peroxidase [EC:1.11.1.11]	osa00053 Ascorbate and aldarate metabolism - Oryza sativa japonica (Japanese rice) (RefSeq); osa00480 Glutathione metabolism - Oryza sativa japonica (Japanese rice) (RefSeq); osa01100 Metabolic pathways - Oryza sativa japonica (Japanese rice) (RefSeq);	PF00141	Peroxidase				A0A287WVA3	A0A287H1C1	0.495344
Cluster4	A0A287GNF7	PDZ domain-containing protein OS=Hordeum vulgare subsp. vulgare OX=112509 PE=4 SV=1	---	1.31	1.243	1.219	1.195	0.975	1.109	0.823	0.785	0.801	0.844	0.838	0.857	0.639	6.0744e-05	0.869	0.086245	0.774	0.051823	1.054	0.025695	chloroplast	GO:0006091 generation of precursor metabolites and energy; GO:0006508 proteolysis; GO:0006807 nitrogen compound metabolic process; GO:0008152 metabolic process; GO:0009056 catabolic process; GO:0009057 macromolecule catabolic process; GO:0009719 response to endogenous stimulus; GO:0009725 response to hormone; GO:0009735 response to cytokinin; GO:0009765 photosynthesis, light harvesting; GO:000998…	GO:0005622 intracellular; GO:0005623 cell; GO:0005634 nucleus; GO:0005737 cytoplasm; GO:0009507 chloroplast; GO:0009534 chloroplast thylakoid; GO:0009535 chloroplast thylakoid membrane; GO:0009536 plastid; GO:0009579 thylakoid; GO:0016020 membrane; GO:0031976 plastid thylakoid; GO:0031977 thylakoid lumen; GO:0031984 organelle subcompartment; GO:0034357 photosynthetic membrane; GO:0042651 thylakoi…	GO:0003824 catalytic activity; GO:0004175 endopeptidase activity; GO:0004252 serine-type endopeptidase activity; GO:0005488 binding; GO:0005515 protein binding; GO:0008233 peptidase activity; GO:0008236 serine-type peptidase activity; GO:0016787 hydrolase activity; GO:0017171 serine hydrolase activity; GO:0042802 identical protein binding; GO:0070011 peptidase activity, acting on L-amino acid pep…				PF13365; PF13180	Trypsin-like peptidase domain; PDZ domain	O	KOG1320	Serine protease	F2DVR7	A0A287GNF7	0.578667
Cluster4	A0A287FI65	mitochondrial carnitine/acylcarnitine carrier-like protein(predicted) OS=Hordeum vulgare subsp. vulgare OX=112509 PE=3 SV=1	---	1.237	1.275	1.314	1.112	1.265	1.186	0.763	0.782	0.8	0.746	0.732	0.788	0.613	2.2427e-05	0.931	0.15334	0.636	0.00047816	0.966	0.2542	chloroplast	GO:0003333 amino acid transmembrane transport; GO:0006810 transport; GO:0006811 ion transport; GO:0006812 cation transport; GO:0006820 anion transport; GO:0006839 mitochondrial transport; GO:0006855 drug transmembrane transport; GO:0006865 amino acid transport; GO:0015711 organic anion transport; GO:0015807 L-amino acid transport; GO:0015822 ornithine transport; GO:0015849 organic acid transport;…	GO:0005622 intracellular; GO:0005623 cell; GO:0005737 cytoplasm; GO:0005739 mitochondrion; GO:0005740 mitochondrial envelope; GO:0005743 mitochondrial inner membrane; GO:0009507 chloroplast; GO:0009536 plastid; GO:0016020 membrane; GO:0016021 integral component of membrane; GO:0019866 organelle inner membrane; GO:0031090 organelle membrane; GO:0031224 intrinsic component of membrane; GO:0031966 m…	GO:0000064 L-ornithine transmembrane transporter activity; GO:0005215 transporter activity; GO:0005342 organic acid transmembrane transporter activity; GO:0008324 cation transmembrane transporter activity; GO:0008509 anion transmembrane transporter activity; GO:0008514 organic anion transmembrane transporter activity; GO:0015075 ion transmembrane transporter activity; GO:0015171 amino acid transm…	K15109	SLC25A20_29, CACT, CACL, CRC1; solute carrier family 25 (mitochondrial carnitine/acylcarnitine transporter), member 20/29				C	KOG0758	Mitochondrial carnitine-acylcarnitine carrier protein	A0A287Q4Q3	A0A287FI65	0.603157
Cluster4	A0A287E0A9	PAP_fibrillin domain-containing protein OS=Hordeum vulgare subsp. vulgare OX=112509 PE=4 SV=1	---	1.354	1.365	1.296	1.149	1.134	1.071	0.793	0.808	0.768	0.727	0.754	0.781	0.59	1.87991e-05	0.835	0.0026003	0.674	0.000195808	0.955	0.142142	chloroplast	GO:0001101 response to acid chemical; GO:0006950 response to stress; GO:0009266 response to temperature stimulus; GO:0009314 response to radiation; GO:0009409 response to cold; GO:0009414 response to water deprivation; GO:0009415 response to water; GO:0009416 response to light stimulus; GO:0009628 response to abiotic stimulus; GO:0009642 response to light intensity; GO:0009644 response to high li…	GO:0005622 intracellular; GO:0005623 cell; GO:0005634 nucleus; GO:0005737 cytoplasm; GO:0005739 mitochondrion; GO:0009507 chloroplast; GO:0009526 plastid envelope; GO:0009532 plastid stroma; GO:0009534 chloroplast thylakoid; GO:0009535 chloroplast thylakoid membrane; GO:0009536 plastid; GO:0009570 chloroplast stroma; GO:0009579 thylakoid; GO:0010287 plastoglobule; GO:0010319 stromule; GO:0016020 …										A0A287HQD0	A0A287E0A9	0.642046
Cluster4	A0A287DY20	Beta-galactosidase OS=Hordeum vulgare subsp. vulgare OX=112509 PE=3 SV=1	---	1.435	1.321	1.413	0.97	1.197	0.879	0.831	0.809	0.872	0.774	0.754	0.746	0.603	0.000116267	0.731	0.027235	0.747	0.090396	0.905	0.0155387	chloroplast		GO:0005618 cell wall; GO:0005622 intracellular; GO:0005623 cell; GO:0005737 cytoplasm; GO:0005773 vacuole; GO:0030312 external encapsulating structure; GO:0043226 organelle; GO:0043227 membrane-bounded organelle; GO:0043229 intracellular organelle; GO:0043231 intracellular membrane-bounded organelle; GO:0044424 intracellular part; GO:0044444 cytoplasmic part; GO:0044464 cell part; GO:0071944 cell…	GO:0003824 catalytic activity; GO:0004553 hydrolase activity, hydrolyzing O-glycosyl compounds; GO:0004565 beta-galactosidase activity; GO:0015925 galactosidase activity; GO:0016787 hydrolase activity; GO:0016798 hydrolase activity, acting on glycosyl bonds;				PF01301; PF02140	Glycosyl hydrolases family 35; Galactose binding lectin domain	G	KOG0496	Beta-galactosidase	A0A287WL38	A0A287DY20	0.44076
Cluster5	S4Z8A5	Photosystem II reaction center protein H OS=Hordeum vulgare subsp. vulgare OX=112509 GN=psbH PE=3 SV=1	psbH	1.257	1.198	1.239	1.292	1.299	1.233	0.691	0.706	0.7	0.756	0.755	0.874	0.568	1.7006e-06	1.035	0.189138	0.624	0.000761	1.137	0.123101	nucleus		GO:0005622 intracellular; GO:0005623 cell; GO:0005737 cytoplasm; GO:0009507 chloroplast; GO:0009521 photosystem; GO:0009523 photosystem II; GO:0009534 chloroplast thylakoid; GO:0009535 chloroplast thylakoid membrane; GO:0009536 plastid; GO:0009579 thylakoid; GO:0009654 photosystem II oxygen evolving complex; GO:0016020 membrane; GO:0031976 plastid thylakoid; GO:0031984 organelle subcompartment; G…		K02709	psbH; photosystem II PsbH protein	osa00195 Photosynthesis - Oryza sativa japonica (Japanese rice) (RefSeq);						A0A287IF33	S4Z8A5	0.580752
Cluster5	S4Z1Z4	Photosystem II CP47 reaction center protein OS=Hordeum vulgare subsp. vulgare OX=112509 GN=psbB PE=3 SV=1	psbB	1.163	1.129	1.151	1.276	1.295	1.234	0.785	0.76	0.782	0.804	0.799	0.822	0.676	4.0852e-06	1.105	0.0039417	0.637	1.55789e-05	1.042	0.036544	plasma membrane				K02704	psbB; photosystem II CP47 chlorophyll apoprotein	osa00195 Photosynthesis - Oryza sativa japonica (Japanese rice) (RefSeq); osa01100 Metabolic pathways - Oryza sativa japonica (Japanese rice) (RefSeq);						A0A287VC78	S4Z1Z4	0.845454
Cluster5	S4Z199	Cytochrome b559 subunit alpha OS=Hordeum vulgare subsp. vulgare OX=112509 GN=psbE PE=3 SV=1	psbE	1.2	1.2	1.187	1.288	1.279	1.289	0.705	0.707	0.737	0.802	0.803	0.804	0.599	2.0748e-06	1.075	7.9935e-05	0.625	2.7102e-9	1.121	0.0154009	nucleus				K02707	psbE; photosystem II cytochrome b559 subunit alpha	osa00195 Photosynthesis - Oryza sativa japonica (Japanese rice) (RefSeq); osa01100 Metabolic pathways - Oryza sativa japonica (Japanese rice) (RefSeq);						F2CWD2	S4Z199	0.778521
Cluster5	S4Z0K2	NAD(P)H-quinone oxidoreductase subunit 5, chloroplastic OS=Hordeum vulgare subsp. vulgare OX=112509 GN=ndhF PE=3 SV=1	ndhF	1.229	1.154	1.166	1.187	1.33	1.261	0.76	0.792	0.797	0.744	0.806	0.775	0.662	7.671e-05	1.065	0.180885	0.615	0.00027503	0.99	0.71996	chloroplast		GO:0005622 intracellular; GO:0005623 cell; GO:0005737 cytoplasm; GO:0009507 chloroplast; GO:0009536 plastid; GO:0043226 organelle; GO:0043227 membrane-bounded organelle; GO:0043229 intracellular organelle; GO:0043231 intracellular membrane-bounded organelle; GO:0044424 intracellular part; GO:0044444 cytoplasmic part; GO:0044464 cell part;							C	KOG4668	NADH dehydrogenase subunits 2, 5, and related proteins	M0WVM3	S4Z0K2	0.535155
Cluster5	S4Z0F5	Cytochrome f OS=Hordeum vulgare subsp. vulgare OX=112509 GN=petA PE=3 SV=1	petA	1.134	1.12	1.134	1.265	1.286	1.26	0.775	0.776	0.785	0.799	0.837	0.83	0.689	1.7862e-7	1.125	9.8271e-05	0.647	4.9031e-06	1.056	0.022142	nucleus	GO:0006091 generation of precursor metabolites and energy; GO:0008152 metabolic process; GO:0009767 photosynthetic electron transport chain; GO:0009987 cellular process; GO:0015979 photosynthesis; GO:0019684 photosynthesis, light reaction; GO:0022900 electron transport chain; GO:0044237 cellular metabolic process; GO:0055114 oxidation-reduction process;	GO:0005622 intracellular; GO:0005623 cell; GO:0005737 cytoplasm; GO:0009507 chloroplast; GO:0009512 cytochrome b6f complex; GO:0009534 chloroplast thylakoid; GO:0009535 chloroplast thylakoid membrane; GO:0009536 plastid; GO:0009579 thylakoid; GO:0016020 membrane; GO:0031976 plastid thylakoid; GO:0031984 organelle subcompartment; GO:0032991 macromolecular complex; GO:0034357 photosynthetic membran…		K02634	petA; apocytochrome f	osa00195 Photosynthesis - Oryza sativa japonica (Japanese rice) (RefSeq); osa01100 Metabolic pathways - Oryza sativa japonica (Japanese rice) (RefSeq);	PF01333	Apocytochrome F, C-terminal				A0A287N1U5	S4Z0F5	0.90331
Cluster5	Q7YMR6	Ribulose bisphosphate carboxylase large chain OS=Hordeum vulgare subsp. vulgare OX=112509 GN=rbcL PE=3 SV=1	rbcL	1.061	1.084	1.093	1.227	1.297	1.248	0.824	0.815	0.84	0.831	0.827	0.854	0.766	2.4203e-05	1.165	0.00121965	0.666	2.4796e-05	1.013	0.37844	cytoplasm		GO:0005622 intracellular; GO:0005623 cell; GO:0005737 cytoplasm; GO:0009507 chloroplast; GO:0009536 plastid; GO:0043226 organelle; GO:0043227 membrane-bounded organelle; GO:0043229 intracellular organelle; GO:0043231 intracellular membrane-bounded organelle; GO:0044424 intracellular part; GO:0044444 cytoplasmic part; GO:0044464 cell part;		K01601	rbcL; ribulose-bisphosphate carboxylase large chain [EC:4.1.1.39]	osa00630 Glyoxylate and dicarboxylate metabolism - Oryza sativa japonica (Japanese rice) (RefSeq); osa00710 Carbon fixation in photosynthetic organisms - Oryza sativa japonica (Japanese rice) (RefSeq); osa01100 Metabolic pathways - Oryza sativa japonica (Japanese rice) (RefSeq); osa01110 Biosynthesis of secondary metabolites - Oryza sativa japonica (Japanese rice) (RefSeq); osa01200 Carbon metabo…	PF02788; PF00016	Ribulose bisphosphate carboxylase large chain, N-terminal domain; Ribulose bisphosphate carboxylase large chain, catalytic domain				A0A287NDK7	Q7YMR6	0.755818
Cluster5	M0XWI0	golgin subfamily A member 2-like(predicted) OS=Hordeum vulgare subsp. vulgare OX=112509 PE=4 SV=1	---	1.151	1.073	1.058	1.32	1.222	1.361	0.83	0.654	0.657	0.944	0.886	0.844	0.652	0.0064196	1.189	0.0138395	0.685	0.00115638	1.249	0.055559	chloroplast												A0A287SHW0	M0XWI0	0.526647
Cluster5	M0WY87	Protein CHUP1, chloroplastic(predicted) OS=Hordeum vulgare subsp. vulgare OX=112509 PE=4 SV=1	---	1.185	1.202	1.16	1.421	1.426	1.396	0.707	0.707	0.667	0.652	0.743	0.734	0.587	1.85655e-05	1.196	0.000123517	0.502	0.0037016	1.023	0.66482	chloroplast	GO:0006996 organelle organization; GO:0009657 plastid organization; GO:0009658 chloroplast organization; GO:0009902 chloroplast relocation; GO:0009987 cellular process; GO:0016043 cellular component organization; GO:0019750 chloroplast localization; GO:0051179 localization; GO:0051234 establishment of localization; GO:0051640 organelle localization; GO:0051641 cellular localization; GO:0051644 pl…	GO:0005622 intracellular; GO:0005623 cell; GO:0005737 cytoplasm; GO:0009507 chloroplast; GO:0009526 plastid envelope; GO:0009527 plastid outer membrane; GO:0009536 plastid; GO:0009707 chloroplast outer membrane; GO:0009941 chloroplast envelope; GO:0016020 membrane; GO:0019867 outer membrane; GO:0031090 organelle membrane; GO:0031967 organelle envelope; GO:0031968 organelle outer membrane; GO:0031…										A0A287PYR1	M0WY87	0.748305
Cluster5	M0WC93	Thylakoid lumenal 15 kDa protein 1 chloroplastic-like(predicted) OS=Hordeum vulgare subsp. vulgare OX=112509 PE=4 SV=1	---	1.145	1.097	1.126	1.284	1.404	1.308	0.729	0.706	0.711	0.826	0.836	0.828	0.637	4.5038e-06	1.186	0.004705	0.623	0.0033633	1.16	0.000139312	chloroplast		GO:0005622 intracellular; GO:0005623 cell; GO:0005737 cytoplasm; GO:0009507 chloroplast; GO:0009534 chloroplast thylakoid; GO:0009535 chloroplast thylakoid membrane; GO:0009536 plastid; GO:0009543 chloroplast thylakoid lumen; GO:0009579 thylakoid; GO:0016020 membrane; GO:0031976 plastid thylakoid; GO:0031977 thylakoid lumen; GO:0031978 plastid thylakoid lumen; GO:0031984 organelle subcompartment;…										A0A287FF64	M0WC93	0.811703
Cluster5	M0WC90	Rhodanese domain-containing protein OS=Hordeum vulgare subsp. vulgare OX=112509 PE=4 SV=1	---	1.5	1.522	1.58	1.686	1.725	1.724	0.361	0.365	0.369	0.39	0.366	0.414	0.238	5.514e-8	1.116	0.0030993	0.228	1.0885e-06	1.068	0.146355	chloroplast							PF00581	Rhodanese-like domain	P	KOG1530	Rhodanese-related sulfurtransferase	A0A287GWK2	M0WC90	0.553952
Cluster5	F2EJP2	Predicted protein OS=Hordeum vulgare subsp. vulgare OX=112509 PE=2 SV=1	---	1.119	1.116	1.116	1.284	1.313	1.261	0.781	0.775	0.803	0.797	0.798	0.836	0.704	0.00094362	1.151	0.0068615	0.63	1.95829e-05	1.031	0.191396	chloroplast		GO:0005622 intracellular; GO:0005623 cell; GO:0005737 cytoplasm; GO:0009507 chloroplast; GO:0009534 chloroplast thylakoid; GO:0009535 chloroplast thylakoid membrane; GO:0009536 plastid; GO:0009579 thylakoid; GO:0016020 membrane; GO:0031976 plastid thylakoid; GO:0031984 organelle subcompartment; GO:0034357 photosynthetic membrane; GO:0042651 thylakoid membrane; GO:0043226 organelle; GO:0043227 mem…		K02692	psaD; photosystem I subunit II	osa00195 Photosynthesis - Oryza sativa japonica (Japanese rice) (RefSeq); osa01100 Metabolic pathways - Oryza sativa japonica (Japanese rice) (RefSeq);						F2DF21	F2EJP2	0.843386
Cluster5	F2ED30	Predicted protein OS=Hordeum vulgare subsp. vulgare OX=112509 PE=2 SV=1	---	1.072	1.119	1.12	1.344	1.333	1.336	0.751	0.714	0.642	0.894	0.928	0.747	0.636	0.00072075	1.212	0.000197164	0.64	0.021435	1.219	0.07368	chloroplast												M0WV50	F2ED30	0.600003
Cluster5	F2E463	Predicted protein OS=Hordeum vulgare subsp. vulgare OX=112509 PE=2 SV=1	---	0.616	1.066	1.475	1.566	1.667	1.784	0.617	0.349	0.605	0.801	0.723	0.731	0.498	0.101703	1.589	0.179181	0.449	8.373e-05	1.435	0.106923	cytoplasm	GO:0009987 cellular process; GO:0016043 cellular component organization; GO:0022607 cellular component assembly; GO:0043933 macromolecular complex subunit organization; GO:0044085 cellular component biogenesis; GO:0051259 protein oligomerization; GO:0051260 protein homooligomerization; GO:0065003 macromolecular complex assembly; GO:0071840 cellular component organization or biogenesis;	GO:0005622 intracellular; GO:0005623 cell; GO:0005737 cytoplasm; GO:0009507 chloroplast; GO:0009536 plastid; GO:0043226 organelle; GO:0043227 membrane-bounded organelle; GO:0043229 intracellular organelle; GO:0043231 intracellular membrane-bounded organelle; GO:0044424 intracellular part; GO:0044444 cytoplasmic part; GO:0044464 cell part;		K13993	HSP20; HSP20 family protein	osa04141 Protein processing in endoplasmic reticulum - Oryza sativa japonica (Japanese rice) (RefSeq);			O	KOG0710	Molecular chaperone (small heat-shock protein Hsp26/Hsp42)	A0A287PYU0	F2E463	0.427892
Cluster5	F2E2Z7	Predicted protein OS=Hordeum vulgare subsp. vulgare OX=112509 PE=2 SV=1	---	1.13	1.027	1.169	1.352	1.367	1.37	0.696	0.738	0.805	0.734	0.687	0.925	0.673	0.0023034	1.229	0.033381	0.574	0.02468	1.048	0.70732	cytoplasm				K18883	ROMT; tricin synthase [EC:2.1.1.175]		PF01596	O-methyltransferase	Q	KOG1663	O-methyltransferase	A0A287HTV0	F2E2Z7	0.553002
Cluster5	F2DWH9	Predicted protein OS=Hordeum vulgare subsp. vulgare OX=112509 PE=2 SV=1	---	1.273	1.261	1.225	1.334	1.375	1.284	0.68	0.732	0.666	0.748	0.777	0.646	0.553	4.1685e-05	1.062	0.058703	0.544	0.00050467	1.045	0.54714	chloroplast	GO:0006950 response to stress; GO:0006979 response to oxidative stress; GO:0050896 response to stimulus;	GO:0005622 intracellular; GO:0005623 cell; GO:0005737 cytoplasm; GO:0009507 chloroplast; GO:0009534 chloroplast thylakoid; GO:0009535 chloroplast thylakoid membrane; GO:0009536 plastid; GO:0009579 thylakoid; GO:0016020 membrane; GO:0031976 plastid thylakoid; GO:0031984 organelle subcompartment; GO:0034357 photosynthetic membrane; GO:0042651 thylakoid membrane; GO:0043226 organelle; GO:0043227 mem…										M0YIA7	F2DWH9	0.52329
Cluster5	F2DE22	Predicted protein OS=Hordeum vulgare subsp. vulgare OX=112509 PE=2 SV=1	---	1.247	1.272	1.232	1.395	1.551	1.518	0.599	0.539	0.548	0.661	0.693	0.743	0.449	1.97186e-05	1.19	0.0067836	0.47	8.3418e-05	1.244	0.0098787	chloroplast	GO:0006091 generation of precursor metabolites and energy; GO:0006139 nucleobase-containing compound metabolic process; GO:0006725 cellular aromatic compound metabolic process; GO:0006732 coenzyme metabolic process; GO:0006733 oxidoreduction coenzyme metabolic process; GO:0006739 NADP metabolic process; GO:0006740 NADPH regeneration; GO:0006753 nucleoside phosphate metabolic process; GO:0006793 p…	GO:0005622 intracellular; GO:0005623 cell; GO:0005737 cytoplasm; GO:0009507 chloroplast; GO:0009521 photosystem; GO:0009522 photosystem I; GO:0009526 plastid envelope; GO:0009534 chloroplast thylakoid; GO:0009535 chloroplast thylakoid membrane; GO:0009536 plastid; GO:0009579 thylakoid; GO:0009941 chloroplast envelope; GO:0016020 membrane; GO:0030093 chloroplast photosystem I; GO:0031967 organelle…		K08905	psaG; photosystem I subunit V	osa00195 Photosynthesis - Oryza sativa japonica (Japanese rice) (RefSeq);						Q40077	F2DE22	0.797696
Cluster5	F2D1J5	Predicted protein OS=Hordeum vulgare subsp. vulgare OX=112509 PE=2 SV=1	---	1.171	1.185	1.132	1.259	1.179	1.278	0.765	0.741	0.754	0.867	0.839	0.831	0.648	1.62408e-05	1.065	0.090375	0.683	0.000162985	1.123	0.00186127	chloroplast									S	KOG2914	Predicted haloacid-halidohydrolase and related hydrolases	A0A287XI88	F2D1J5	0.677522
Cluster5	F2CWI6	Predicted protein OS=Hordeum vulgare subsp. vulgare OX=112509 PE=2 SV=1	---	1.155	1.148	1.158	1.316	1.385	1.254	0.758	0.724	0.757	0.786	0.78	0.779	0.647	4.522e-06	1.143	0.04408	0.593	0.0030382	1.047	0.038782	chloroplast		GO:0005622 intracellular; GO:0005623 cell; GO:0005737 cytoplasm; GO:0009507 chloroplast; GO:0009532 plastid stroma; GO:0009534 chloroplast thylakoid; GO:0009536 plastid; GO:0009570 chloroplast stroma; GO:0009579 thylakoid; GO:0031976 plastid thylakoid; GO:0031977 thylakoid lumen; GO:0031984 organelle subcompartment; GO:0043226 organelle; GO:0043227 membrane-bounded organelle; GO:0043229 intracell…					PF01789	PsbP				M0YCI8	F2CWI6	0.836898
Cluster5	F2CVB4	Predicted protein OS=Hordeum vulgare subsp. vulgare OX=112509 PE=2 SV=1	---	1.537	1.491	1.427	1.89	1.84	1.886	0.355	0.365	0.342	0.246	0.257	0.364	0.238	4.7622e-7	1.261	0.00056148	0.154	0.0043206	0.816	0.22364	cytoskeleton	GO:0006725 cellular aromatic compound metabolic process; GO:0006778 porphyrin-containing compound metabolic process; GO:0006790 sulfur compound metabolic process; GO:0006807 nitrogen compound metabolic process; GO:0008152 metabolic process; GO:0009987 cellular process; GO:0010035 response to inorganic substance; GO:0010477 response to sulfur dioxide; GO:0015994 chlorophyll metabolic process; GO:0…	GO:0005622 intracellular; GO:0005623 cell; GO:0005737 cytoplasm; GO:0005739 mitochondrion; GO:0005777 peroxisome; GO:0042579 microbody; GO:0043226 organelle; GO:0043227 membrane-bounded organelle; GO:0043229 intracellular organelle; GO:0043231 intracellular membrane-bounded organelle; GO:0044424 intracellular part; GO:0044444 cytoplasmic part; GO:0044464 cell part;	GO:0003824 catalytic activity; GO:0008482 sulfite oxidase activity; GO:0016491 oxidoreductase activity; GO:0016667 oxidoreductase activity, acting on a sulfur group of donors; GO:0016670 oxidoreductase activity, acting on a sulfur group of donors, oxygen as acceptor;	K00387	SUOX; sulfite oxidase [EC:1.8.3.1]	osa00920 Sulfur metabolism - Oryza sativa japonica (Japanese rice) (RefSeq); osa01100 Metabolic pathways - Oryza sativa japonica (Japanese rice) (RefSeq);	PF00174; PF03404	Oxidoreductase molybdopterin binding domain; Mo-co oxidoreductase dimerisation domain	C	KOG0535	Sulfite oxidase, molybdopterin-binding component	A0A287U3X4	F2CVB4	0.430622
Cluster5	F2CQR8	Chlorophyll a-b binding protein, chloroplastic OS=Hordeum vulgare subsp. vulgare OX=112509 PE=2 SV=1	---	1.159	1.231	1.148	1.255	1.276	1.292	0.802	0.766	0.778	0.761	0.781	0.753	0.663	8.4748e-05	1.081	0.029219	0.6	1.5634e-06	0.978	0.27416	chloroplast				K08917	LHCB6; light-harvesting complex II chlorophyll a/b binding protein 6	osa00196 Photosynthesis - antenna proteins - Oryza sativa japonica (Japanese rice) (RefSeq); osa01100 Metabolic pathways - Oryza sativa japonica (Japanese rice) (RefSeq);						A0A287KXN1	F2CQR8	0.567483
Cluster5	A0A287Y2C2	Nuclear protein(predicted) OS=Hordeum vulgare subsp. vulgare OX=112509 PE=4 SV=1	---	1.08	1.109	1.116	1.258	1.273	1.229	0.829	0.81	0.818	0.809	0.834	0.837	0.743	1.81993e-05	1.138	0.00086117	0.66	4.9422e-06	1.009	0.50734	chloroplast												A0A287GN16	A0A287Y2C2	0.789326
Cluster5	A0A287XHH4	PPIase cyclophilin-type domain-containing protein OS=Hordeum vulgare subsp. vulgare OX=112509 PE=4 SV=1	---	1.209	1.154	1.174	1.296	1.246	1.293	0.758	0.755	0.769	0.774	0.79	0.781	0.645	3.77e-06	1.084	0.012236	0.611	1.9905e-06	1.028	0.028664	chloroplast	GO:0000413 protein peptidyl-prolyl isomerization; GO:0006457 protein folding; GO:0006464 cellular protein modification process; GO:0006807 nitrogen compound metabolic process; GO:0008152 metabolic process; GO:0009987 cellular process; GO:0018193 peptidyl-amino acid modification; GO:0018208 peptidyl-proline modification; GO:0019538 protein metabolic process; GO:0036211 protein modification process…	GO:0005622 intracellular; GO:0005623 cell; GO:0005737 cytoplasm; GO:0009507 chloroplast; GO:0009536 plastid; GO:0009579 thylakoid; GO:0031977 thylakoid lumen; GO:0032991 macromolecular complex; GO:0043226 organelle; GO:0043227 membrane-bounded organelle; GO:0043229 intracellular organelle; GO:0043231 intracellular membrane-bounded organelle; GO:0044424 intracellular part; GO:0044436 thylakoid par…	GO:0003755 peptidyl-prolyl cis-trans isomerase activity; GO:0003824 catalytic activity; GO:0005488 binding; GO:0008144 drug binding; GO:0016018 cyclosporin A binding; GO:0016853 isomerase activity; GO:0016859 cis-trans isomerase activity; GO:0033218 amide binding; GO:0042277 peptide binding; GO:0044877 macromolecular complex binding;	K03768	PPIB, ppiB; peptidyl-prolyl cis-trans isomerase B (cyclophilin B) [EC:5.2.1.8]		PF00160	Cyclophilin type peptidyl-prolyl cis-trans isomerase/CLD	O	KOG0865	Cyclophilin type peptidyl-prolyl cis-trans isomerase	A0A287WHM1	A0A287XHH4	0.718402
Cluster5	A0A287X6N5	Peptidylprolyl isomerase OS=Hordeum vulgare subsp. vulgare OX=112509 PE=4 SV=1	---	1.113	1.268	1.058	1.088	1.308	1.194	0.772	0.849	0.658	0.839	0.841	1.012	0.663	0.0107633	1.044	0.59978	0.75	0.02412	1.181	0.15776	chloroplast	GO:0000413 protein peptidyl-prolyl isomerization; GO:0006091 generation of precursor metabolites and energy; GO:0006457 protein folding; GO:0006464 cellular protein modification process; GO:0006807 nitrogen compound metabolic process; GO:0008152 metabolic process; GO:0009987 cellular process; GO:0010207 photosystem II assembly; GO:0015979 photosynthesis; GO:0016043 cellular component organization…	GO:0005622 intracellular; GO:0005623 cell; GO:0005737 cytoplasm; GO:0009507 chloroplast; GO:0009536 plastid; GO:0009579 thylakoid; GO:0031977 thylakoid lumen; GO:0043226 organelle; GO:0043227 membrane-bounded organelle; GO:0043229 intracellular organelle; GO:0043231 intracellular membrane-bounded organelle; GO:0044424 intracellular part; GO:0044436 thylakoid part; GO:0044444 cytoplasmic part; GO:…	GO:0003755 peptidyl-prolyl cis-trans isomerase activity; GO:0003824 catalytic activity; GO:0005488 binding; GO:0005527 macrolide binding; GO:0005528 FK506 binding; GO:0008144 drug binding; GO:0016491 oxidoreductase activity; GO:0016853 isomerase activity; GO:0016859 cis-trans isomerase activity; GO:0097159 organic cyclic compound binding; GO:1901363 heterocyclic compound binding;				PF00254	FKBP-type peptidyl-prolyl cis-trans isomerase				F2D5L3	A0A287X6N5	0.419927
Cluster5	A0A287WPK6	PPIase cyclophilin-type domain-containing protein OS=Hordeum vulgare subsp. vulgare OX=112509 PE=4 SV=1	---	1.135	1.116	1.121	1.28	1.321	1.303	0.756	0.771	0.727	0.822	0.819	0.831	0.668	2.1758e-05	1.158	0.000144689	0.633	7.1926e-7	1.097	0.0065227	chloroplast	GO:0006950 response to stress; GO:0006952 defense response; GO:0009605 response to external stimulus; GO:0009607 response to biotic stimulus; GO:0009617 response to bacterium; GO:0042742 defense response to bacterium; GO:0043207 response to external biotic stimulus; GO:0050896 response to stimulus; GO:0051704 multi-organism process; GO:0051707 response to other organism; GO:0098542 defense respon…	GO:0005622 intracellular; GO:0005623 cell; GO:0005737 cytoplasm; GO:0009507 chloroplast; GO:0009532 plastid stroma; GO:0009534 chloroplast thylakoid; GO:0009535 chloroplast thylakoid membrane; GO:0009536 plastid; GO:0009570 chloroplast stroma; GO:0009579 thylakoid; GO:0016020 membrane; GO:0031976 plastid thylakoid; GO:0031977 thylakoid lumen; GO:0031984 organelle subcompartment; GO:0034357 photos…					PF00160	Cyclophilin type peptidyl-prolyl cis-trans isomerase/CLD				A0A287NU21	A0A287WPK6	0.876223
Cluster5	A0A287WNP2	Carboxypeptidase OS=Hordeum vulgare subsp. vulgare OX=112509 PE=3 SV=1	---	0.943	0.918	1.024	1.199	1.513	1.242	0.826	0.875	0.965	0.767	0.87	0.859	0.924	0.227	1.371	0.0173766	0.631	0.0052768	0.936	0.3408	chloroplast				K09646	SCPEP1; serine carboxypeptidase 1 [EC:3.4.16.-]		PF00450	Serine carboxypeptidase	O	KOG1283	Serine carboxypeptidases	M0X6H9	A0A287WNP2	0.339282
Cluster5	A0A287WHA8	PEROXIDASE_4 domain-containing protein OS=Hordeum vulgare subsp. vulgare OX=112509 PE=3 SV=1	---	1.128	1.069	1.076	1.402	1.307	1.186	0.786	0.804	0.736	0.803	0.858	0.845	0.711	0.0004029	1.19	0.02866	0.643	0.00111813	1.077	0.087376	chloroplast	GO:0000003 reproduction; GO:0000302 response to reactive oxygen species; GO:0003006 developmental process involved in reproduction; GO:0006950 response to stress; GO:0006979 response to oxidative stress; GO:0007275 multicellular organism development; GO:0008152 metabolic process; GO:0009056 catabolic process; GO:0009636 response to toxic substance; GO:0009791 post-embryonic development; GO:000984…	GO:0005622 intracellular; GO:0005623 cell; GO:0005737 cytoplasm; GO:0005829 cytosol; GO:0044424 intracellular part; GO:0044444 cytoplasmic part; GO:0044464 cell part;	GO:0003824 catalytic activity; GO:0004130 cytochrome-c peroxidase activity; GO:0004601 peroxidase activity; GO:0016209 antioxidant activity; GO:0016491 oxidoreductase activity; GO:0016684 oxidoreductase activity, acting on peroxide as acceptor;	K00434	E1.11.1.11; L-ascorbate peroxidase [EC:1.11.1.11]	osa00053 Ascorbate and aldarate metabolism - Oryza sativa japonica (Japanese rice) (RefSeq); osa00480 Glutathione metabolism - Oryza sativa japonica (Japanese rice) (RefSeq); osa01100 Metabolic pathways - Oryza sativa japonica (Japanese rice) (RefSeq);	PF00141	Peroxidase				A0A287N7Q0	A0A287WHA8	0.658014
Cluster5	A0A287WGI2	PsbP domain-containing protein OS=Hordeum vulgare subsp. vulgare OX=112509 PE=4 SV=1	---	1.118	1.16	1.128	1.276	1.264	1.185	0.755	0.74	0.75	0.894	0.874	0.856	0.659	2.4764e-06	1.094	0.025856	0.704	0.000183766	1.169	0.00035814	nucleus		GO:0005622 intracellular; GO:0005623 cell; GO:0005737 cytoplasm; GO:0009507 chloroplast; GO:0009534 chloroplast thylakoid; GO:0009535 chloroplast thylakoid membrane; GO:0009536 plastid; GO:0009579 thylakoid; GO:0016020 membrane; GO:0031976 plastid thylakoid; GO:0031977 thylakoid lumen; GO:0031984 organelle subcompartment; GO:0034357 photosynthetic membrane; GO:0042651 thylakoid membrane; GO:00432…					PF01789	PsbP				A0A287NPY9	A0A287WGI2	0.705305
Cluster5	A0A287WFY0	PsbP domain-containing protein OS=Hordeum vulgare subsp. vulgare OX=112509 PE=4 SV=1	---	1.087	1.103	1.061	1.305	1.313	1.252	0.786	0.757	0.774	0.876	0.819	0.866	0.713	2.3738e-05	1.19	0.00074315	0.662	8.3116e-05	1.105	0.0131246	chloroplast							PF01789	PsbP				A0A287KUM9	A0A287WFY0	0.771717
Cluster5	A0A287WCF0	Chlorophyll a-b binding protein, chloroplastic OS=Hordeum vulgare subsp. vulgare OX=112509 PE=3 SV=1	---	1.182	1.207	1.189	1.245	1.302	1.331	0.709	0.719	0.77	0.765	0.825	0.757	0.614	4.4665e-05	1.084	0.0177034	0.605	0.000117312	1.068	0.1531	chloroplast	GO:0006091 generation of precursor metabolites and energy; GO:0006950 response to stress; GO:0008152 metabolic process; GO:0009266 response to temperature stimulus; GO:0009314 response to radiation; GO:0009409 response to cold; GO:0009416 response to light stimulus; GO:0009628 response to abiotic stimulus; GO:0009637 response to blue light; GO:0009639 response to red or far red light; GO:0009642 …	GO:0005622 intracellular; GO:0005623 cell; GO:0005737 cytoplasm; GO:0009507 chloroplast; GO:0009526 plastid envelope; GO:0009532 plastid stroma; GO:0009534 chloroplast thylakoid; GO:0009535 chloroplast thylakoid membrane; GO:0009536 plastid; GO:0009570 chloroplast stroma; GO:0009579 thylakoid; GO:0009941 chloroplast envelope; GO:0010287 plastoglobule; GO:0016020 membrane; GO:0031967 organelle env…	GO:0005488 binding; GO:0005515 protein binding; GO:0016168 chlorophyll binding; GO:0019904 protein domain specific binding; GO:0031409 pigment binding; GO:0043167 ion binding; GO:0043168 anion binding; GO:0046906 tetrapyrrole binding; GO:0048037 cofactor binding; GO:0097159 organic cyclic compound binding; GO:1901363 heterocyclic compound binding;	K08907	LHCA1; light-harvesting complex I chlorophyll a/b binding protein 1	osa00196 Photosynthesis - antenna proteins - Oryza sativa japonica (Japanese rice) (RefSeq); osa01100 Metabolic pathways - Oryza sativa japonica (Japanese rice) (RefSeq);						A0A287Q1S2	A0A287WCF0	0.71156
Cluster5	A0A287VXQ9	Glutathione peroxidase OS=Hordeum vulgare subsp. vulgare OX=112509 PE=3 SV=1	---	1.214	1.117	1.202	1.089	1.301	1.377	0.813	0.729	0.763	0.787	0.792	0.815	0.652	0.00048159	1.066	0.47132	0.636	0.024479	1.039	0.31028	chloroplast	GO:0009628 response to abiotic stimulus; GO:0050896 response to stimulus; GO:0080167 response to karrikin;	GO:0005622 intracellular; GO:0005623 cell; GO:0005737 cytoplasm; GO:0009507 chloroplast; GO:0009526 plastid envelope; GO:0009532 plastid stroma; GO:0009534 chloroplast thylakoid; GO:0009535 chloroplast thylakoid membrane; GO:0009536 plastid; GO:0009570 chloroplast stroma; GO:0009579 thylakoid; GO:0009941 chloroplast envelope; GO:0016020 membrane; GO:0031967 organelle envelope; GO:0031975 envelope…							O	KOG1651	Glutathione peroxidase	F2DCE8	A0A287VXQ9	0.514728
Cluster5	A0A287VDG0	Ferredoxin--NADP reductase, chloroplastic OS=Hordeum vulgare subsp. vulgare OX=112509 PE=4 SV=1	---	1.171	1.173	1.227	1.36	1.26	1.234	0.781	0.763	0.751	0.805	0.807	0.667	0.643	2.0248e-05	1.079	0.085483	0.591	0.00162091	0.993	0.87486	cytoplasm		GO:0005622 intracellular; GO:0005623 cell; GO:0005737 cytoplasm; GO:0009507 chloroplast; GO:0009534 chloroplast thylakoid; GO:0009535 chloroplast thylakoid membrane; GO:0009536 plastid; GO:0009579 thylakoid; GO:0016020 membrane; GO:0031976 plastid thylakoid; GO:0031984 organelle subcompartment; GO:0032991 macromolecular complex; GO:0034357 photosynthetic membrane; GO:0042651 thylakoid membrane; G…		K02641	petH; ferredoxin--NADP+ reductase [EC:1.18.1.2]	osa00195 Photosynthesis - Oryza sativa japonica (Japanese rice) (RefSeq); osa01100 Metabolic pathways - Oryza sativa japonica (Japanese rice) (RefSeq);	PF00175	Oxidoreductase NAD-binding domain	C	KOG1158	NADP/FAD dependent oxidoreductase	M0Y5F0	A0A287VDG0	0.473816
Cluster5	A0A287UQJ1	Peptidylprolyl isomerase OS=Hordeum vulgare subsp. vulgare OX=112509 PE=4 SV=1	---	1.049	1.01	1.336	1.169	1.324	1.468	0.754	0.607	0.761	0.808	0.808	0.906	0.625	0.0151194	1.167	0.22346	0.637	0.004141	1.189	0.100983	chloroplast	GO:0000413 protein peptidyl-prolyl isomerization; GO:0006457 protein folding; GO:0006464 cellular protein modification process; GO:0006807 nitrogen compound metabolic process; GO:0008152 metabolic process; GO:0009987 cellular process; GO:0018193 peptidyl-amino acid modification; GO:0018208 peptidyl-proline modification; GO:0019538 protein metabolic process; GO:0036211 protein modification process…	GO:0005622 intracellular; GO:0005623 cell; GO:0005737 cytoplasm; GO:0009507 chloroplast; GO:0009534 chloroplast thylakoid; GO:0009535 chloroplast thylakoid membrane; GO:0009536 plastid; GO:0009579 thylakoid; GO:0016020 membrane; GO:0031976 plastid thylakoid; GO:0031984 organelle subcompartment; GO:0034357 photosynthetic membrane; GO:0042651 thylakoid membrane; GO:0043226 organelle; GO:0043227 mem…	GO:0003755 peptidyl-prolyl cis-trans isomerase activity; GO:0003824 catalytic activity; GO:0005488 binding; GO:0005527 macrolide binding; GO:0005528 FK506 binding; GO:0008144 drug binding; GO:0016853 isomerase activity; GO:0016859 cis-trans isomerase activity; GO:0097159 organic cyclic compound binding; GO:1901363 heterocyclic compound binding;	K01802	E5.2.1.8; peptidylprolyl isomerase [EC:5.2.1.8]		PF00254	FKBP-type peptidyl-prolyl cis-trans isomerase	O	KOG0549	FKBP-type peptidyl-prolyl cis-trans isomerase	A0A287VJQ7	A0A287UQJ1	0.508935
Cluster5	A0A287TW23	DUF3119 family protein(predicted) OS=Hordeum vulgare subsp. vulgare OX=112509 PE=4 SV=1	---	1.154	1.089	1.194	1.195	1.19	1.303	0.76	0.833	0.851	0.807	0.811	0.813	0.711	0.00147534	1.073	0.153177	0.659	0.0050411	0.995	0.91592	mitochondria												A0A287HG55	A0A287TW23	0.528218
Cluster5	A0A287TUT5	Chlorophyll a-b binding protein, chloroplastic OS=Hordeum vulgare subsp. vulgare OX=112509 PE=3 SV=1	---	1.172	1.149	1.179	1.289	1.282	1.319	0.757	0.756	0.773	0.772	0.774	0.777	0.653	1.1502e-06	1.111	0.00083593	0.597	2.6833e-7	1.016	0.096479	chloroplast				K08909	LHCA3; light-harvesting complex I chlorophyll a/b binding protein 3	osa00196 Photosynthesis - antenna proteins - Oryza sativa japonica (Japanese rice) (RefSeq); osa01100 Metabolic pathways - Oryza sativa japonica (Japanese rice) (RefSeq);						A0A287X674	A0A287TUT5	0.780864
Cluster5	A0A287TN02	Pterin-binding domain-containing protein OS=Hordeum vulgare subsp. vulgare OX=112509 PE=4 SV=1	---	1.189	1.196	1.2	1.171	1.236	1.197	0.76	0.748	0.753	0.842	0.853	0.856	0.631	5.4071e-8	1.005	0.76702	0.708	3.528e-05	1.128	5.988e-05	chloroplast	GO:0006950 response to stress; GO:0008152 metabolic process; GO:0009266 response to temperature stimulus; GO:0009409 response to cold; GO:0009628 response to abiotic stimulus; GO:0050896 response to stimulus; GO:0055114 oxidation-reduction process;	GO:0005576 extracellular region; GO:0005622 intracellular; GO:0005623 cell; GO:0005737 cytoplasm; GO:0009507 chloroplast; GO:0009526 plastid envelope; GO:0009532 plastid stroma; GO:0009536 plastid; GO:0009570 chloroplast stroma; GO:0009579 thylakoid; GO:0009941 chloroplast envelope; GO:0010319 stromule; GO:0031967 organelle envelope; GO:0031975 envelope; GO:0043226 organelle; GO:0043227 membrane-…	GO:0003824 catalytic activity; GO:0016491 oxidoreductase activity; GO:0016627 oxidoreductase activity, acting on the CH-CH group of donors; GO:0016628 oxidoreductase activity, acting on the CH-CH group of donors, NAD or NADP as acceptor; GO:0035671 enone reductase activity; GO:0035798 2-alkenal reductase (NADP+) activity;	K18980	EO, FaQR; 2-methylene-furan-3-one reductase [EC:1.3.1.105]		PF08240; PF13602	Alcohol dehydrogenase GroES-like domain; Zinc-binding dehydrogenase	C	KOG1198	Zinc-binding oxidoreductase	M0ZCR9	A0A287TN02	0.550247
Cluster5	A0A287TEE6	Alpha/beta-Hydrolases superfamily protein(predicted) OS=Hordeum vulgare subsp. vulgare OX=112509 PE=4 SV=1	---	1.175	1.171	1.193	1.295	1.326	1.18	0.751	0.818	0.725	0.846	0.795	0.727	0.648	0.0068962	1.074	0.123419	0.623	0.00111637	1.032	0.6126	chloroplast												M0Y075	A0A287TEE6	0.538843
Cluster5	A0A287TE59	DUF1995 domain-containing protein OS=Hordeum vulgare subsp. vulgare OX=112509 PE=3 SV=1	---	1.102	1.058	1.129	1.241	1.281	1.374	0.757	0.836	0.752	0.782	0.792	0.897	0.713	0.00097817	1.185	0.0089798	0.634	0.00100385	1.054	0.40588	cytoplasm	GO:0006139 nucleobase-containing compound metabolic process; GO:0006725 cellular aromatic compound metabolic process; GO:0006753 nucleoside phosphate metabolic process; GO:0006793 phosphorus metabolic process; GO:0006796 phosphate-containing compound metabolic process; GO:0006807 nitrogen compound metabolic process; GO:0008152 metabolic process; GO:0009058 biosynthetic process; GO:0009117 nucleot…	GO:0005622 intracellular; GO:0005623 cell; GO:0005737 cytoplasm; GO:0009507 chloroplast; GO:0009526 plastid envelope; GO:0009534 chloroplast thylakoid; GO:0009535 chloroplast thylakoid membrane; GO:0009536 plastid; GO:0009579 thylakoid; GO:0009941 chloroplast envelope; GO:0016020 membrane; GO:0031967 organelle envelope; GO:0031975 envelope; GO:0031976 plastid thylakoid; GO:0031984 organelle subco…	GO:0003824 catalytic activity; GO:0004017 adenylate kinase activity; GO:0016301 kinase activity; GO:0016740 transferase activity; GO:0016772 transferase activity, transferring phosphorus-containing groups; GO:0016776 phosphotransferase activity, phosphate group as acceptor; GO:0019205 nucleobase-containing compound kinase activity; GO:0050145 nucleoside phosphate kinase activity;	K00939	adk, AK; adenylate kinase [EC:2.7.4.3]	osa00230 Purine metabolism - Oryza sativa japonica (Japanese rice) (RefSeq); osa00730 Thiamine metabolism - Oryza sativa japonica (Japanese rice) (RefSeq); osa01100 Metabolic pathways - Oryza sativa japonica (Japanese rice) (RefSeq); osa01110 Biosynthesis of secondary metabolites - Oryza sativa japonica (Japanese rice) (RefSeq);	PF00406; PF09353	Adenylate kinase; Domain of unknown function (DUF1995)	F	KOG3078	Adenylate kinase	M0XYS7	A0A287TE59	0.647704
Cluster5	A0A287TBK2	Translation initiation factor IF-2(predicted) OS=Hordeum vulgare subsp. vulgare OX=112509 PE=4 SV=1	---	1.123	1.107	1.135	1.315	1.519	1.315	0.691	0.765	0.762	0.766	0.751	0.751	0.659	0.00025667	1.233	0.050904	0.547	0.0064405	1.023	0.5292	chloroplast												A0A287NAS7	A0A287TBK2	0.707069
Cluster5	A0A287T9E1	DUF1995 domain-containing protein OS=Hordeum vulgare subsp. vulgare OX=112509 PE=4 SV=1	---	1.108	1.161	1.132	1.298	1.363	1.231	0.774	0.756	0.769	0.807	0.797	0.804	0.676	1.67835e-05	1.144	0.0143155	0.619	0.0038019	1.047	0.004276	chloroplast	GO:0009719 response to endogenous stimulus; GO:0009725 response to hormone; GO:0009735 response to cytokinin; GO:0010033 response to organic substance; GO:0042221 response to chemical; GO:0050896 response to stimulus;	GO:0005622 intracellular; GO:0005623 cell; GO:0005737 cytoplasm; GO:0009507 chloroplast; GO:0009532 plastid stroma; GO:0009536 plastid; GO:0009570 chloroplast stroma; GO:0043226 organelle; GO:0043227 membrane-bounded organelle; GO:0043229 intracellular organelle; GO:0043231 intracellular membrane-bounded organelle; GO:0044422 organelle part; GO:0044424 intracellular part; GO:0044434 chloroplast p…					PF09353	Domain of unknown function (DUF1995)				A0A287VCA9	A0A287T9E1	0.830379
Cluster5	A0A287T458	2-Hacid_dh_C domain-containing protein OS=Hordeum vulgare subsp. vulgare OX=112509 PE=4 SV=1	---	1.137	1.136	1.17	1.258	1.236	1.27	0.768	0.786	0.793	0.837	0.803	0.807	0.682	4.7233e-06	1.093	0.0020608	0.65	4.7381e-06	1.043	0.061837	cytoplasm	GO:0001101 response to acid chemical; GO:0006950 response to stress; GO:0007154 cell communication; GO:0008152 metabolic process; GO:0009314 response to radiation; GO:0009414 response to water deprivation; GO:0009415 response to water; GO:0009416 response to light stimulus; GO:0009605 response to external stimulus; GO:0009628 response to abiotic stimulus; GO:0009853 photorespiration; GO:0009854 o…	GO:0005576 extracellular region; GO:0005622 intracellular; GO:0005623 cell; GO:0005737 cytoplasm; GO:0005777 peroxisome; GO:0005829 cytosol; GO:0009507 chloroplast; GO:0009536 plastid; GO:0042579 microbody; GO:0043226 organelle; GO:0043227 membrane-bounded organelle; GO:0043229 intracellular organelle; GO:0043231 intracellular membrane-bounded organelle; GO:0044424 intracellular part; GO:0044444 …	GO:0003676 nucleic acid binding; GO:0003723 RNA binding; GO:0003727 single-stranded RNA binding; GO:0003824 catalytic activity; GO:0005488 binding; GO:0008187 poly-pyrimidine tract binding; GO:0008266 poly(U) RNA binding; GO:0008465 glycerate dehydrogenase activity; GO:0016491 oxidoreductase activity; GO:0016614 oxidoreductase activity, acting on CH-OH group of donors; GO:0016616 oxidoreductase a…	K15893	HPR1; hydroxypyruvate reductase 1	osa00260 Glycine, serine and threonine metabolism - Oryza sativa japonica (Japanese rice) (RefSeq); osa00630 Glyoxylate and dicarboxylate metabolism - Oryza sativa japonica (Japanese rice) (RefSeq); osa01100 Metabolic pathways - Oryza sativa japonica (Japanese rice) (RefSeq); osa01110 Biosynthesis of secondary metabolites - Oryza sativa japonica (Japanese rice) (RefSeq); osa01200 Carbon metabolis…	PF02826	D-isomer specific 2-hydroxyacid dehydrogenase, NAD binding domain	C	KOG0069	Glyoxylate/hydroxypyruvate reductase (D-isomer-specific 2-hydroxy acid dehydrogenase superfamily)	A0A287F0B7	A0A287T458	0.811039
Cluster5	A0A287T1I8	Ribosom_S30AE_C domain-containing protein OS=Hordeum vulgare subsp. vulgare OX=112509 PE=4 SV=1	---	1.12	1.069	1.149	1.377	1.513	1.451	0.733	0.704	0.685	0.701	0.757	0.743	0.636	9.8172e-05	1.3	0.00159937	0.507	4.2632e-05	1.037	0.29682	chloroplast												M0YGY9	A0A287T1I8	0.746069
Cluster5	A0A287SSS3	Photosystem I reaction center subunit IV, chloroplastic(predicted) OS=Hordeum vulgare subsp. vulgare OX=112509 PE=4 SV=1	---	1.025	1.072	1.09	1.283	1.35	1.32	0.738	0.735	0.774	0.852	0.877	0.884	0.705	0.000143045	1.24	0.0007849	0.661	2.1829e-05	1.163	0.00165704	chloroplast				K02693	psaE; photosystem I subunit IV	osa00195 Photosynthesis - Oryza sativa japonica (Japanese rice) (RefSeq); osa01100 Metabolic pathways - Oryza sativa japonica (Japanese rice) (RefSeq);	PF02427	Photosystem I reaction centre subunit IV / PsaE				A0A287IBQ1	A0A287SSS3	0.703179
Cluster5	A0A287SQE0	Glycosyltransferase OS=Hordeum vulgare subsp. vulgare OX=112509 PE=3 SV=1	---	1.109	1.138	1.23	1.184	1.244	1.201	0.844	0.858	0.803	0.797	0.789	0.803	0.72	0.00089843	1.044	0.27444	0.658	1.5697e-05	0.954	0.083998	mitochondria									G	KOG1192	UDP-glucuronosyl and UDP-glucosyl transferase	A0A287SHI7	A0A287SQE0	0.414591
Cluster5	A0A287SNY4	Putative glyoxalase I (Fragment)(predicted) OS=Hordeum vulgare subsp. vulgare OX=112509 PE=4 SV=1	---	1.023	1.191	1.188	1.228	1.374	1.224	0.717	0.737	0.807	0.782	0.85	0.878	0.665	0.0027212	1.125	0.133264	0.656	0.00120015	1.11	0.102938	chloroplast	GO:0006081 cellular aldehyde metabolic process; GO:0006082 organic acid metabolic process; GO:0006089 lactate metabolic process; GO:0006950 response to stress; GO:0008152 metabolic process; GO:0009056 catabolic process; GO:0009266 response to temperature stimulus; GO:0009409 response to cold; GO:0009438 methylglyoxal metabolic process; GO:0009628 response to abiotic stimulus; GO:0009987 cellular …	GO:0005622 intracellular; GO:0005623 cell; GO:0005737 cytoplasm; GO:0009507 chloroplast; GO:0009526 plastid envelope; GO:0009532 plastid stroma; GO:0009536 plastid; GO:0009570 chloroplast stroma; GO:0009579 thylakoid; GO:0010319 stromule; GO:0031967 organelle envelope; GO:0031975 envelope; GO:0031977 thylakoid lumen; GO:0043226 organelle; GO:0043227 membrane-bounded organelle; GO:0043229 intracel…	GO:0003824 catalytic activity; GO:0004462 lactoylglutathione lyase activity; GO:0016829 lyase activity; GO:0016846 carbon-sulfur lyase activity;	K01759	GLO1, gloA; lactoylglutathione lyase [EC:4.4.1.5]	osa00620 Pyruvate metabolism - Oryza sativa japonica (Japanese rice) (RefSeq); osa01100 Metabolic pathways - Oryza sativa japonica (Japanese rice) (RefSeq);	PF00903	Glyoxalase/Bleomycin resistance protein/Dioxygenase superfamily	G	KOG2943	Predicted glyoxalase	A0A287SNY4	A0A287SNY4	0.635092
Cluster5	A0A287SHQ9	ADF-H domain-containing protein OS=Hordeum vulgare subsp. vulgare OX=112509 PE=3 SV=1	---	1.155	1.293	1.26	1.452	1.586	1.247	0.598	0.49	0.455	0.8	0.782	0.881	0.416	0.00056367	1.156	0.145483	0.575	0.0022559	1.596	0.0061216	nucleus				K05765	CFL; cofilin		PF00241	Cofilin/tropomyosin-type actin-binding protein	Z	KOG1735	Actin depolymerizing factor	A0A287SXP4	A0A287SHQ9	0.524662
Cluster5	A0A287S930	MBD domain-containing protein OS=Hordeum vulgare subsp. vulgare OX=112509 PE=4 SV=1	---	0.659	0.837	0.799	1.398	1.267	1.315	0.991	0.881	0.82	0.983	0.996	1.054	1.173	0.152518	1.734	0.002122	0.762	0.00162085	1.127	0.10866	nucleus							PF01429	Methyl-CpG binding domain				M0WV50	A0A287S930	0.225279
Cluster5	A0A287S876	31 kDa ribonucleoprotein, chloroplastic(predicted) OS=Hordeum vulgare subsp. vulgare OX=112509 PE=4 SV=1	---	1.001	1.025	1.047	1.315	1.349	1.294	0.806	0.766	0.782	0.888	0.873	0.855	0.766	0.000175747	1.288	0.000140324	0.661	1.71885e-05	1.111	0.0045587	chloroplast							PF00076	RNA recognition motif. (a.k.a. RRM, RBD, or RNP domain)	A	KOG0118	FOG: RRM domain	A0A287TUT5	A0A287S876	0.628586
Cluster5	A0A287S6A0	PDZ domain-containing protein OS=Hordeum vulgare subsp. vulgare OX=112509 PE=4 SV=1	---	1.072	1.012	1.087	1.226	1.318	1.301	0.814	0.812	0.81	0.865	0.823	0.86	0.768	0.0068756	1.213	0.0035005	0.663	0.000116266	1.046	0.105258	chloroplast	GO:0006508 proteolysis; GO:0006807 nitrogen compound metabolic process; GO:0008152 metabolic process; GO:0019538 protein metabolic process; GO:0043170 macromolecule metabolic process; GO:0044238 primary metabolic process; GO:0071704 organic substance metabolic process; GO:1901564 organonitrogen compound metabolic process;	GO:0005622 intracellular; GO:0005623 cell; GO:0005737 cytoplasm; GO:0005739 mitochondrion; GO:0009579 thylakoid; GO:0031977 thylakoid lumen; GO:0043226 organelle; GO:0043227 membrane-bounded organelle; GO:0043229 intracellular organelle; GO:0043231 intracellular membrane-bounded organelle; GO:0044424 intracellular part; GO:0044436 thylakoid part; GO:0044444 cytoplasmic part; GO:0044464 cell part;	GO:0003824 catalytic activity; GO:0004175 endopeptidase activity; GO:0008233 peptidase activity; GO:0016787 hydrolase activity; GO:0070011 peptidase activity, acting on L-amino acid peptides;	K03797	E3.4.21.102, prc, ctpA; carboxyl-terminal processing protease [EC:3.4.21.102]							M0Z9D1	A0A287S6A0	0.689043
Cluster5	A0A287S2W4	X8 domain-containing protein OS=Hordeum vulgare subsp. vulgare OX=112509 PE=3 SV=1	---	0.988	1.583	0.667	2.112	1.076	1.367	0.622	0.797	0.658	0.76	0.624	0.746	0.641	0.2116	1.407	0.31704	0.468	0.024985	1.026	0.79586	endoplasmic reticulum							PF00332; PF07983	Glycosyl hydrolases family 17; X8 domain				M0XWI0	A0A287S2W4	0.320644
Cluster5	A0A287RY92	60S ribosomal protein L5(predicted) OS=Hordeum vulgare subsp. vulgare OX=112509 PE=4 SV=1	---	1.168	1.156	1.219	1.306	1.301	1.335	0.699	0.711	0.704	0.813	0.795	0.794	0.597	3.4855e-06	1.113	0.004135	0.609	7.5838e-7	1.136	0.000155827	chloroplast												A0A287L5I7	A0A287RY92	0.836052
Cluster5	A0A287R189	ADF-H domain-containing protein OS=Hordeum vulgare subsp. vulgare OX=112509 PE=3 SV=1	---	0.46	0.431	0.458	1.406	1.531	1.487	0.383	0.415	0.38	2.169	1.445	1.435	0.873	0.0180176	3.279	1.7067e-06	1.141	0.45998	4.286	0.00050015	chloroplast				K05765	CFL; cofilin		PF00241	Cofilin/tropomyosin-type actin-binding protein	Z	KOG1735	Actin depolymerizing factor		A0A287R189	0.208637
Cluster5	A0A287QW66	J domain-containing protein OS=Hordeum vulgare subsp. vulgare OX=112509 PE=4 SV=1	---	1.233	1.207	1.201	1.262	1.195	1.206	0.69	0.722	0.742	0.833	0.867	0.843	0.592	2.0279e-05	1.006	0.77172	0.694	5.9965e-05	1.181	0.0023785	chloroplast		GO:0005622 intracellular; GO:0005623 cell; GO:0005737 cytoplasm; GO:0009507 chloroplast; GO:0009534 chloroplast thylakoid; GO:0009535 chloroplast thylakoid membrane; GO:0009536 plastid; GO:0009579 thylakoid; GO:0010598 NAD(P)H dehydrogenase complex (plastoquinone); GO:0016020 membrane; GO:0031976 plastid thylakoid; GO:0031984 organelle subcompartment; GO:0032991 macromolecular complex; GO:0034357…		K23052			PF00226	DnaJ domain				A0A287VDG0	A0A287QW66	0.51589
Cluster5	A0A287QA48	Protease Do-like 5, chloroplastic(predicted) OS=Hordeum vulgare subsp. vulgare OX=112509 PE=4 SV=1	---	1.086	1.112	1.099	1.278	1.261	1.353	0.791	0.777	0.808	0.797	0.799	0.837	0.721	1.78397e-05	1.18	0.00186231	0.625	6.1269e-05	1.024	0.29378	cytoplasm	GO:0006091 generation of precursor metabolites and energy; GO:0006807 nitrogen compound metabolic process; GO:0008152 metabolic process; GO:0009765 photosynthesis, light harvesting; GO:0009987 cellular process; GO:0010206 photosystem II repair; GO:0015979 photosynthesis; GO:0019538 protein metabolic process; GO:0019684 photosynthesis, light reaction; GO:0030091 protein repair; GO:0043170 macromol…	GO:0005622 intracellular; GO:0005623 cell; GO:0005737 cytoplasm; GO:0009507 chloroplast; GO:0009534 chloroplast thylakoid; GO:0009536 plastid; GO:0009543 chloroplast thylakoid lumen; GO:0009579 thylakoid; GO:0031976 plastid thylakoid; GO:0031977 thylakoid lumen; GO:0031978 plastid thylakoid lumen; GO:0031984 organelle subcompartment; GO:0043226 organelle; GO:0043227 membrane-bounded organelle; GO…					PF13365	Trypsin-like peptidase domain	O	KOG1320	Serine protease	A0A287PI54	A0A287QA48	0.757929
Cluster5	A0A287PNA7	SHSP domain-containing protein OS=Hordeum vulgare subsp. vulgare OX=112509 PE=3 SV=1	---	1.382	1.036	1.315	1.479	1.129	1.408	0.629	0.711	0.668	0.8	0.65	0.793	0.538	0.0030407	1.076	0.57568	0.559	0.0056418	1.117	0.23274	chloroplast									O	KOG0710	Molecular chaperone (small heat-shock protein Hsp26/Hsp42)	A0A287FZE4	A0A287PNA7	0.442186
Cluster5	A0A287PMF6	Expressed protein(predicted) OS=Hordeum vulgare subsp. vulgare OX=112509 PE=4 SV=1	---	1.131	1.17	1.171	1.261	1.327	1.273	0.734	0.758	0.766	0.789	0.797	0.823	0.65	1.75768e-05	1.112	0.005442	0.624	1.99347e-05	1.067	0.023123	chloroplast	GO:0006091 generation of precursor metabolites and energy; GO:0008152 metabolic process; GO:0009767 photosynthetic electron transport chain; GO:0009773 photosynthetic electron transport in photosystem I; GO:0009987 cellular process; GO:0015979 photosynthesis; GO:0019684 photosynthesis, light reaction; GO:0022900 electron transport chain; GO:0044237 cellular metabolic process; GO:0055114 oxidation…	GO:0005622 intracellular; GO:0005623 cell; GO:0005737 cytoplasm; GO:0009507 chloroplast; GO:0009534 chloroplast thylakoid; GO:0009535 chloroplast thylakoid membrane; GO:0009536 plastid; GO:0009579 thylakoid; GO:0010598 NAD(P)H dehydrogenase complex (plastoquinone); GO:0016020 membrane; GO:0031976 plastid thylakoid; GO:0031984 organelle subcompartment; GO:0032991 macromolecular complex; GO:0034357…										A0A287WCF0	A0A287PMF6	0.87347
Cluster5	A0A287PAB0	50S ribosomal protein L4, chloroplastic(predicted) OS=Hordeum vulgare subsp. vulgare OX=112509 PE=4 SV=1	---	0.757	0.727	0.747	1.396	1.413	1.451	0.843	0.826	0.866	0.99	0.973	1.011	1.136	0.0021436	1.909	1.2606e-06	0.698	2.1358e-05	1.173	0.0008193	chloroplast	GO:0006412 translation; GO:0006518 peptide metabolic process; GO:0006807 nitrogen compound metabolic process; GO:0008152 metabolic process; GO:0009058 biosynthetic process; GO:0009059 macromolecule biosynthetic process; GO:0009987 cellular process; GO:0010467 gene expression; GO:0019538 protein metabolic process; GO:0034641 cellular nitrogen compound metabolic process; GO:0034645 cellular macromo…	GO:0000311 plastid large ribosomal subunit; GO:0000313 organellar ribosome; GO:0000315 organellar large ribosomal subunit; GO:0005622 intracellular; GO:0005623 cell; GO:0005634 nucleus; GO:0005737 cytoplasm; GO:0005829 cytosol; GO:0005840 ribosome; GO:0009507 chloroplast; GO:0009532 plastid stroma; GO:0009534 chloroplast thylakoid; GO:0009535 chloroplast thylakoid membrane; GO:0009536 plastid; GO…	GO:0003676 nucleic acid binding; GO:0003723 RNA binding; GO:0003727 single-stranded RNA binding; GO:0003735 structural constituent of ribosome; GO:0005198 structural molecule activity; GO:0005488 binding; GO:0008187 poly-pyrimidine tract binding; GO:0008266 poly(U) RNA binding; GO:0097159 organic cyclic compound binding; GO:1901363 heterocyclic compound binding;	K02926	RP-L4, MRPL4, rplD; large subunit ribosomal protein L4	osa03010 Ribosome - Oryza sativa japonica (Japanese rice) (RefSeq);			J	KOG1624	Mitochondrial/chloroplast ribosomal protein L4		A0A287PAB0	0.256663
Cluster5	A0A287P6G9	PEROXIDASE_4 domain-containing protein OS=Hordeum vulgare subsp. vulgare OX=112509 PE=3 SV=1	---	1.087	1.093	1.041	1.236	1.281	1.251	0.856	0.823	0.859	0.839	0.832	0.802	0.788	0.00032074	1.17	0.00109554	0.656	1.86053e-05	0.974	0.25406	cytoplasm	GO:0000302 response to reactive oxygen species; GO:0006950 response to stress; GO:0006979 response to oxidative stress; GO:0008152 metabolic process; GO:0009056 catabolic process; GO:0009636 response to toxic substance; GO:0009987 cellular process; GO:0016999 antibiotic metabolic process; GO:0017001 antibiotic catabolic process; GO:0017144 drug metabolic process; GO:0033554 cellular response to s…	GO:0005622 intracellular; GO:0005623 cell; GO:0005737 cytoplasm; GO:0009507 chloroplast; GO:0009536 plastid; GO:0043226 organelle; GO:0043227 membrane-bounded organelle; GO:0043229 intracellular organelle; GO:0043231 intracellular membrane-bounded organelle; GO:0044424 intracellular part; GO:0044444 cytoplasmic part; GO:0044464 cell part;	GO:0003824 catalytic activity; GO:0004130 cytochrome-c peroxidase activity; GO:0004601 peroxidase activity; GO:0016209 antioxidant activity; GO:0016491 oxidoreductase activity; GO:0016684 oxidoreductase activity, acting on peroxide as acceptor; GO:0016688 L-ascorbate peroxidase activity;	K00434	E1.11.1.11; L-ascorbate peroxidase [EC:1.11.1.11]	osa00053 Ascorbate and aldarate metabolism - Oryza sativa japonica (Japanese rice) (RefSeq); osa00480 Glutathione metabolism - Oryza sativa japonica (Japanese rice) (RefSeq); osa01100 Metabolic pathways - Oryza sativa japonica (Japanese rice) (RefSeq);	PF00141	Peroxidase				S4YYJ7	A0A287P6G9	0.593114
Cluster5	A0A287P2H1	Thioredoxin domain-containing protein OS=Hordeum vulgare subsp. vulgare OX=112509 PE=4 SV=1	---	1.155	1.178	1.177	1.226	1.249	1.244	0.834	0.836	0.826	0.749	0.768	0.759	0.711	6.6848e-7	1.06	0.0025012	0.612	3.6531e-7	0.912	0.00034045	chloroplast	GO:0009314 response to radiation; GO:0009416 response to light stimulus; GO:0009628 response to abiotic stimulus; GO:0010196 nonphotochemical quenching; GO:0050896 response to stimulus; GO:1990066 energy quenching;	GO:0005622 intracellular; GO:0005623 cell; GO:0005737 cytoplasm; GO:0009507 chloroplast; GO:0009532 plastid stroma; GO:0009534 chloroplast thylakoid; GO:0009536 plastid; GO:0009570 chloroplast stroma; GO:0009579 thylakoid; GO:0016020 membrane; GO:0031976 plastid thylakoid; GO:0031984 organelle subcompartment; GO:0034357 photosynthetic membrane; GO:0042651 thylakoid membrane; GO:0043226 organelle;…					PF13905	Thioredoxin-like	O	KOG2914	Predicted haloacid-halidohydrolase and related hydrolases	A0A287N2I1	A0A287P2H1	0.349867
Cluster5	A0A287NIL2	Elongation factor P(predicted) OS=Hordeum vulgare subsp. vulgare OX=112509 PE=3 SV=1	---	1.121	1.18	1.19	1.188	1.236	1.24	0.744	0.732	0.739	0.865	0.865	0.899	0.634	1.95317e-05	1.05	0.104599	0.718	6.0463e-05	1.187	0.00023757	chloroplast				K02356	efp; elongation factor P		PF08207; PF01132; PF09285	Elongation factor P (EF-P) KOW-like domain; Elongation factor P (EF-P) OB domain; Elongation factor P, C-terminal				A0A287RSR0	A0A287NIL2	0.635211
Cluster5	A0A287NAF4	Photosynthetic NDH subunit of subcomplex B 1, chloroplastic(predicted) OS=Hordeum vulgare subsp. vulgare OX=112509 PE=4 SV=1	---	1.158	1.188	1.194	1.218	1.245	1.217	0.795	0.77	0.785	0.795	0.802	0.833	0.664	3.2795e-06	1.04	0.032265	0.66	1.67982e-05	1.034	0.12248	chloroplast	GO:0006091 generation of precursor metabolites and energy; GO:0008152 metabolic process; GO:0009767 photosynthetic electron transport chain; GO:0009773 photosynthetic electron transport in photosystem I; GO:0009987 cellular process; GO:0015979 photosynthesis; GO:0019684 photosynthesis, light reaction; GO:0022900 electron transport chain; GO:0044237 cellular metabolic process; GO:0055114 oxidation…	GO:0005622 intracellular; GO:0005623 cell; GO:0005737 cytoplasm; GO:0009507 chloroplast; GO:0009534 chloroplast thylakoid; GO:0009535 chloroplast thylakoid membrane; GO:0009536 plastid; GO:0009579 thylakoid; GO:0010598 NAD(P)H dehydrogenase complex (plastoquinone); GO:0016020 membrane; GO:0031976 plastid thylakoid; GO:0031984 organelle subcompartment; GO:0032991 macromolecular complex; GO:0034357…										A0A287E0A9	A0A287NAF4	0.629085
Cluster5	A0A287MQ83	Thioredoxin OS=Hordeum vulgare subsp. vulgare OX=112509 PE=3 SV=1	---	1.135	1.115	1.165	1.201	1.166	1.258	0.735	0.747	0.782	0.889	0.905	0.901	0.663	5.6412e-05	1.061	0.080557	0.743	0.00020056	1.19	0.00083541	chloroplast	GO:0006950 response to stress; GO:0006979 response to oxidative stress; GO:0008152 metabolic process; GO:0009314 response to radiation; GO:0009416 response to light stimulus; GO:0009628 response to abiotic stimulus; GO:0009636 response to toxic substance; GO:0009987 cellular process; GO:0019725 cellular homeostasis; GO:0033554 cellular response to stress; GO:0034599 cellular response to oxidative…	GO:0005622 intracellular; GO:0005623 cell; GO:0005737 cytoplasm; GO:0009507 chloroplast; GO:0009532 plastid stroma; GO:0009536 plastid; GO:0009570 chloroplast stroma; GO:0043226 organelle; GO:0043227 membrane-bounded organelle; GO:0043229 intracellular organelle; GO:0043231 intracellular membrane-bounded organelle; GO:0044422 organelle part; GO:0044424 intracellular part; GO:0044434 chloroplast p…	GO:0003824 catalytic activity; GO:0004791 thioredoxin-disulfide reductase activity; GO:0008047 enzyme activator activity; GO:0015035 protein disulfide oxidoreductase activity; GO:0015036 disulfide oxidoreductase activity; GO:0016209 antioxidant activity; GO:0016491 oxidoreductase activity; GO:0016651 oxidoreductase activity, acting on NAD(P)H; GO:0016667 oxidoreductase activity, acting on a sulfu…				PF00085	Thioredoxin	O	KOG0910	Thioredoxin-like protein	M0XKB2	A0A287MQ83	0.609182
Cluster5	A0A287MP90	NAD(P)H-quinone oxidoreductase subunit O, chloroplastic(predicted) OS=Hordeum vulgare subsp. vulgare OX=112509 PE=4 SV=1	---	1.372	1.01	1.118	1.302	1.283	1.2	0.637	0.524	0.779	0.821	0.982	0.973	0.554	0.0150434	1.081	0.41036	0.733	0.0078585	1.431	0.045643	extracellular	GO:0009987 cellular process; GO:0010257 NADH dehydrogenase complex assembly; GO:0010258 NADH dehydrogenase complex (plastoquinone) assembly; GO:0016043 cellular component organization; GO:0022607 cellular component assembly; GO:0034622 cellular macromolecular complex assembly; GO:0043933 macromolecular complex subunit organization; GO:0044085 cellular component biogenesis; GO:0065003 macromolecul…	GO:0005622 intracellular; GO:0005623 cell; GO:0005737 cytoplasm; GO:0009507 chloroplast; GO:0009534 chloroplast thylakoid; GO:0009535 chloroplast thylakoid membrane; GO:0009536 plastid; GO:0009579 thylakoid; GO:0010598 NAD(P)H dehydrogenase complex (plastoquinone); GO:0016020 membrane; GO:0031976 plastid thylakoid; GO:0031984 organelle subcompartment; GO:0032991 macromolecular complex; GO:0034357…										A0A287X9B0	A0A287MP90	0.414447
Cluster5	A0A287MM18	Glycine/D-amino acid oxidases-like(predicted) OS=Hordeum vulgare subsp. vulgare OX=112509 PE=4 SV=1	---	1.19	1.069	1.218	1.394	1.278	1.148	0.821	0.858	0.776	0.728	0.853	0.669	0.706	0.0021847	1.099	0.25126	0.589	0.0042383	0.916	0.3001	chloroplast												S4Z8A5	A0A287MM18	0.339871
Cluster5	A0A287LT76	Protein CHLOROPLAST ENHANCING STRESS TOLERANCE, chloroplastic(predicted) OS=Hordeum vulgare subsp. vulgare OX=112509 PE=4 SV=1	---	0.937	1.235	1.54	1.947	1.027	1.51	0.41	0.745	0.344	0.983	0.83	0.492	0.404	0.026358	1.208	0.49612	0.514	0.073658	1.538	0.22688	chloroplast	GO:0001101 response to acid chemical; GO:0006091 generation of precursor metabolites and energy; GO:0006950 response to stress; GO:0006970 response to osmotic stress; GO:0006972 hyperosmotic response; GO:0006979 response to oxidative stress; GO:0006996 organelle organization; GO:0008152 metabolic process; GO:0009266 response to temperature stimulus; GO:0009408 response to heat; GO:0009414 respons…	GO:0005622 intracellular; GO:0005623 cell; GO:0005737 cytoplasm; GO:0009507 chloroplast; GO:0009534 chloroplast thylakoid; GO:0009535 chloroplast thylakoid membrane; GO:0009536 plastid; GO:0009579 thylakoid; GO:0016020 membrane; GO:0031976 plastid thylakoid; GO:0031984 organelle subcompartment; GO:0034357 photosynthetic membrane; GO:0042651 thylakoid membrane; GO:0043226 organelle; GO:0043227 mem…										A0A287MD16	A0A287LT76	0.364488
Cluster5	A0A287LEJ5	Protein plastid transcriptionally active 16, chloroplastic(predicted) OS=Hordeum vulgare subsp. vulgare OX=112509 PE=4 SV=1	---	1.181	1.109	1.11	1.235	1.264	1.262	0.741	0.77	0.753	0.863	0.85	0.861	0.666	6.3429e-05	1.106	0.0101986	0.684	8.8723e-7	1.137	0.00044235	chloroplast	GO:0007623 circadian rhythm; GO:0048511 rhythmic process;	GO:0000229 cytoplasmic chromosome; GO:0005622 intracellular; GO:0005623 cell; GO:0005694 chromosome; GO:0005737 cytoplasm; GO:0009295 nucleoid; GO:0009507 chloroplast; GO:0009508 plastid chromosome; GO:0009526 plastid envelope; GO:0009532 plastid stroma; GO:0009534 chloroplast thylakoid; GO:0009535 chloroplast thylakoid membrane; GO:0009536 plastid; GO:0009570 chloroplast stroma; GO:0009579 thyla…							G	KOG1203	Predicted dehydrogenase	A0A287PM39	A0A287LEJ5	0.782382
Cluster5	A0A287L8S4	50S ribosomal protein L12-2, chloroplastic(predicted) OS=Hordeum vulgare subsp. vulgare OX=112509 PE=3 SV=1	---	1.111	1.17	1.162	1.125	1.12	1.106	0.737	0.732	0.765	0.971	0.966	1.036	0.649	3.7175e-05	0.973	0.18958	0.887	0.0064826	1.331	0.00041606	chloroplast				K02935	RP-L7, MRPL12, rplL; large subunit ribosomal protein L7/L12	osa03010 Ribosome - Oryza sativa japonica (Japanese rice) (RefSeq);	PF00542	Ribosomal protein L7/L12 C-terminal domain	J	KOG1715	Mitochondrial/chloroplast ribosomal protein L12	M0Y240	A0A287L8S4	0.390349
Cluster5	A0A287L5I7	Carbonic anhydrase OS=Hordeum vulgare subsp. vulgare OX=112509 PE=3 SV=1	---	0.96	1.048	1.055	1.458	1.353	1.484	0.659	0.692	0.639	0.926	0.852	0.874	0.65	0.0003568	1.402	0.00124013	0.617	0.0002161	1.333	0.00105905	chloroplast	GO:0002376 immune system process; GO:0006950 response to stress; GO:0006952 defense response; GO:0006955 immune response; GO:0008152 metabolic process; GO:0009266 response to temperature stimulus; GO:0009409 response to cold; GO:0009605 response to external stimulus; GO:0009607 response to biotic stimulus; GO:0009617 response to bacterium; GO:0009620 response to fungus; GO:0009628 response to abi…	GO:0005576 extracellular region; GO:0005622 intracellular; GO:0005623 cell; GO:0005737 cytoplasm; GO:0005829 cytosol; GO:0005886 plasma membrane; GO:0009507 chloroplast; GO:0009526 plastid envelope; GO:0009532 plastid stroma; GO:0009534 chloroplast thylakoid; GO:0009535 chloroplast thylakoid membrane; GO:0009536 plastid; GO:0009570 chloroplast stroma; GO:0009579 thylakoid; GO:0009941 chloroplast …	GO:0003824 catalytic activity; GO:0004089 carbonate dehydratase activity; GO:0016829 lyase activity; GO:0016835 carbon-oxygen lyase activity; GO:0016836 hydro-lyase activity;	K01673	cynT, can; carbonic anhydrase [EC:4.2.1.1]	osa00910 Nitrogen metabolism - Oryza sativa japonica (Japanese rice) (RefSeq); osa01100 Metabolic pathways - Oryza sativa japonica (Japanese rice) (RefSeq);	PF00484	Carbonic anhydrase	P	KOG1578	Predicted carbonic anhydrase involved in protection against oxidative damage	A0A287Y0I9	A0A287L5I7	0.554134
Cluster5	A0A287KJ16	ABC transmembrane type-1 domain-containing protein OS=Hordeum vulgare subsp. vulgare OX=112509 PE=4 SV=1	---	1.127	1.145	1.137	1.438	1.407	1.356	0.75	0.831	0.731	0.7	0.687	0.692	0.678	0.0100796	1.232	0.00029949	0.495	1.278e-06	0.899	0.117943	chloroplast		GO:0005622 intracellular; GO:0005623 cell; GO:0005737 cytoplasm; GO:0009507 chloroplast; GO:0009536 plastid; GO:0043226 organelle; GO:0043227 membrane-bounded organelle; GO:0043229 intracellular organelle; GO:0043231 intracellular membrane-bounded organelle; GO:0044424 intracellular part; GO:0044444 cytoplasmic part; GO:0044464 cell part;					PF00005	ABC transporter	Q	KOG0060	Long-chain acyl-CoA transporter, ABC superfamily (involved in peroxisome organization and biogenesis)	M0WC90	A0A287KJ16	0.456718
Cluster5	A0A287K6P0	Serine/threonine-protein phosphatase OS=Hordeum vulgare subsp. vulgare OX=112509 PE=4 SV=1	---	1.198	1.19	1.281	1.706	1.715	1.682	0.454	0.447	0.466	0.626	0.602	0.632	0.373	1.5464e-06	1.391	0.000163718	0.364	1.8759e-7	1.361	8.4266e-05	chloroplast	GO:0007623 circadian rhythm; GO:0009314 response to radiation; GO:0009416 response to light stimulus; GO:0009628 response to abiotic stimulus; GO:0009987 cellular process; GO:0048511 rhythmic process; GO:0050896 response to stimulus; GO:0051716 cellular response to stimulus; GO:0071214 cellular response to abiotic stimulus; GO:0071478 cellular response to radiation; GO:0071482 cellular response t…	GO:0005622 intracellular; GO:0005623 cell; GO:0005737 cytoplasm; GO:0009507 chloroplast; GO:0009526 plastid envelope; GO:0009532 plastid stroma; GO:0009534 chloroplast thylakoid; GO:0009535 chloroplast thylakoid membrane; GO:0009536 plastid; GO:0009570 chloroplast stroma; GO:0009579 thylakoid; GO:0009941 chloroplast envelope; GO:0016020 membrane; GO:0031967 organelle envelope; GO:0031975 envelope…										A0A287IQB8	A0A287K6P0	0.85454
Cluster5	A0A287K274	PB1 domain-containing protein OS=Hordeum vulgare subsp. vulgare OX=112509 PE=4 SV=1	---	0.901	0.734	0.773	1.043	1.401	1.315	0.702	0.825	0.896	1.238	0.996	1.176	1.006	0.96042	1.561	0.0153793	0.907	0.44602	1.407	0.02434	nucleus							PF00564	PB1 domain					A0A287K274	0.225378
Cluster5	A0A287JVY4	Peptidyl-prolyl cis-trans isomerase OS=Hordeum vulgare subsp. vulgare OX=112509 PE=3 SV=1	---	1.149	1.175	1.178	1.267	1.352	1.254	0.737	0.741	0.727	0.793	0.817	0.811	0.63	5.8839e-7	1.106	0.0157002	0.625	4.4459e-05	1.098	0.00091947	chloroplast	GO:0000413 protein peptidyl-prolyl isomerization; GO:0006464 cellular protein modification process; GO:0006807 nitrogen compound metabolic process; GO:0007275 multicellular organism development; GO:0008152 metabolic process; GO:0009987 cellular process; GO:0018193 peptidyl-amino acid modification; GO:0018208 peptidyl-proline modification; GO:0019538 protein metabolic process; GO:0022622 root syst…	GO:0005622 intracellular; GO:0005623 cell; GO:0005737 cytoplasm; GO:0005783 endoplasmic reticulum; GO:0005911 cell-cell junction; GO:0009506 plasmodesma; GO:0009507 chloroplast; GO:0009536 plastid; GO:0012505 endomembrane system; GO:0030054 cell junction; GO:0043226 organelle; GO:0043227 membrane-bounded organelle; GO:0043229 intracellular organelle; GO:0043231 intracellular membrane-bounded orga…	GO:0003755 peptidyl-prolyl cis-trans isomerase activity; GO:0003824 catalytic activity; GO:0016853 isomerase activity; GO:0016859 cis-trans isomerase activity;	K03768	PPIB, ppiB; peptidyl-prolyl cis-trans isomerase B (cyclophilin B) [EC:5.2.1.8]		PF00160	Cyclophilin type peptidyl-prolyl cis-trans isomerase/CLD	O	KOG0865	Cyclophilin type peptidyl-prolyl cis-trans isomerase	A0A287G4N5	A0A287JVY4	0.857116
Cluster5	A0A287IY62	NAD(P)H-quinone oxidoreductase subunit M, chloroplastic(predicted) OS=Hordeum vulgare subsp. vulgare OX=112509 PE=4 SV=1	---	1.086	1.092	1.149	1.265	1.295	1.32	0.737	0.735	0.742	0.835	0.859	0.886	0.665	0.00198369	1.166	0.0021041	0.665	4.0981e-05	1.165	0.00091968	nucleus	GO:0009987 cellular process; GO:0010257 NADH dehydrogenase complex assembly; GO:0010258 NADH dehydrogenase complex (plastoquinone) assembly; GO:0016043 cellular component organization; GO:0022607 cellular component assembly; GO:0034622 cellular macromolecular complex assembly; GO:0043933 macromolecular complex subunit organization; GO:0044085 cellular component biogenesis; GO:0065003 macromolecul…	GO:0005622 intracellular; GO:0005623 cell; GO:0005737 cytoplasm; GO:0009507 chloroplast; GO:0009534 chloroplast thylakoid; GO:0009535 chloroplast thylakoid membrane; GO:0009536 plastid; GO:0009579 thylakoid; GO:0010598 NAD(P)H dehydrogenase complex (plastoquinone); GO:0016020 membrane; GO:0031976 plastid thylakoid; GO:0031984 organelle subcompartment; GO:0032991 macromolecular complex; GO:0034357…										A0A287SCI5	A0A287IY62	0.77933
Cluster5	A0A287IRV5	PsbP domain-containing protein OS=Hordeum vulgare subsp. vulgare OX=112509 PE=4 SV=1	---	1.078	1.082	1.081	1.277	1.297	1.297	0.787	0.784	0.796	0.815	0.841	0.865	0.73	1.4931e-7	1.194	2.362e-06	0.651	1.90981e-05	1.065	0.024284	chloroplast		GO:0005622 intracellular; GO:0005623 cell; GO:0005737 cytoplasm; GO:0009507 chloroplast; GO:0009532 plastid stroma; GO:0009534 chloroplast thylakoid; GO:0009536 plastid; GO:0009570 chloroplast stroma; GO:0009579 thylakoid; GO:0031976 plastid thylakoid; GO:0031977 thylakoid lumen; GO:0031984 organelle subcompartment; GO:0043226 organelle; GO:0043227 membrane-bounded organelle; GO:0043229 intracell…					PF01789	PsbP				A0A287LNB4	A0A287IRV5	0.811476
Cluster5	A0A287IQB8	Ribulose bisphosphate carboxylase large chain (Fragment)(predicted) OS=Hordeum vulgare subsp. vulgare OX=112509 PE=4 SV=1	---	0.587	0.548	0.592	1.739	1.769	1.741	0.499	0.25	0.535	1.187	1.275	1.279	0.743	0.28848	3.039	7.7161e-7	0.713	0.000175296	2.914	0.044162	chloroplast		GO:0005622 intracellular; GO:0005623 cell; GO:0005737 cytoplasm; GO:0009507 chloroplast; GO:0009536 plastid; GO:0043226 organelle; GO:0043227 membrane-bounded organelle; GO:0043229 intracellular organelle; GO:0043231 intracellular membrane-bounded organelle; GO:0044424 intracellular part; GO:0044444 cytoplasmic part; GO:0044464 cell part;		K01601	rbcL; ribulose-bisphosphate carboxylase large chain [EC:4.1.1.39]	osa00630 Glyoxylate and dicarboxylate metabolism - Oryza sativa japonica (Japanese rice) (RefSeq); osa00710 Carbon fixation in photosynthetic organisms - Oryza sativa japonica (Japanese rice) (RefSeq); osa01100 Metabolic pathways - Oryza sativa japonica (Japanese rice) (RefSeq); osa01110 Biosynthesis of secondary metabolites - Oryza sativa japonica (Japanese rice) (RefSeq); osa01200 Carbon metabo…	PF02788; PF00016	Ribulose bisphosphate carboxylase large chain, N-terminal domain; Ribulose bisphosphate carboxylase large chain, catalytic domain					A0A287IQB8	0.276994
Cluster5	A0A287ILM1	Protease Do-like 8, chloroplastic(predicted) OS=Hordeum vulgare subsp. vulgare OX=112509 PE=4 SV=1	---	1.287	1.177	0.834	1.451	1.957	1.228	0.803	0.918	0.254	0.473	1.101	0.517	0.599	0.21188	1.406	0.149378	0.451	0.046916	1.059	0.81628	chloroplast	GO:0006091 generation of precursor metabolites and energy; GO:0006508 proteolysis; GO:0006807 nitrogen compound metabolic process; GO:0008152 metabolic process; GO:0009765 photosynthesis, light harvesting; GO:0009987 cellular process; GO:0010206 photosystem II repair; GO:0015979 photosynthesis; GO:0019538 protein metabolic process; GO:0019684 photosynthesis, light reaction; GO:0030091 protein rep…	GO:0005622 intracellular; GO:0005623 cell; GO:0005737 cytoplasm; GO:0009507 chloroplast; GO:0009534 chloroplast thylakoid; GO:0009536 plastid; GO:0009543 chloroplast thylakoid lumen; GO:0009579 thylakoid; GO:0031976 plastid thylakoid; GO:0031977 thylakoid lumen; GO:0031978 plastid thylakoid lumen; GO:0031984 organelle subcompartment; GO:0043226 organelle; GO:0043227 membrane-bounded organelle; GO…	GO:0003824 catalytic activity; GO:0008233 peptidase activity; GO:0016787 hydrolase activity;				PF13365	Trypsin-like peptidase domain	O	KOG1320	Serine protease	A0A287J4U5	A0A287ILM1	0.312495
Cluster5	A0A287IHY4	PsbP domain-containing protein OS=Hordeum vulgare subsp. vulgare OX=112509 PE=4 SV=1	---	1.068	1.104	1.114	1.24	1.362	1.306	0.747	0.759	0.759	0.882	0.857	0.8	0.689	1.57593e-05	1.189	0.0045185	0.65	0.00040326	1.121	0.018262	chloroplast							PF01789	PsbP				A0A287TVF2	A0A287IHY4	0.757649
Cluster5	A0A287I564	Photosystem I reaction center subunit psaK, chloroplastic OS=Hordeum vulgare subsp. vulgare OX=112509 PE=4 SV=1	---	1.157	1.157	1.203	1.26	1.382	1.399	0.756	0.717	0.816	0.77	0.78	0.604	0.651	0.00041527	1.149	0.0177392	0.533	0.0020829	0.941	0.509	chloroplast												A0A287JHF7	A0A287I564	0.439653
Cluster5	A0A287I476	Tetratricopeptide repeat containing protein(predicted) OS=Hordeum vulgare subsp. vulgare OX=112509 PE=4 SV=1	---	1.072	1.098	1.071	1.273	1.327	1.277	0.78	0.748	0.808	0.848	0.834	0.864	0.721	0.000159694	1.196	0.00033627	0.657	1.75832e-05	1.09	0.024321	chloroplast	GO:0006091 generation of precursor metabolites and energy; GO:0006807 nitrogen compound metabolic process; GO:0006950 response to stress; GO:0008152 metabolic process; GO:0009314 response to radiation; GO:0009416 response to light stimulus; GO:0009611 response to wounding; GO:0009628 response to abiotic stimulus; GO:0009642 response to light intensity; GO:0009644 response to high light intensity;…	GO:0005622 intracellular; GO:0005623 cell; GO:0005737 cytoplasm; GO:0009507 chloroplast; GO:0009509 chromoplast; GO:0009526 plastid envelope; GO:0009532 plastid stroma; GO:0009534 chloroplast thylakoid; GO:0009535 chloroplast thylakoid membrane; GO:0009536 plastid; GO:0009570 chloroplast stroma; GO:0009575 chromoplast stroma; GO:0009579 thylakoid; GO:0009941 chloroplast envelope; GO:0016020 membr…										F2E3F5	A0A287I476	0.78677
Cluster5	A0A287HS45	PPIase cyclophilin-type domain-containing protein OS=Hordeum vulgare subsp. vulgare OX=112509 PE=4 SV=1	---	1.118	1.109	1.128	1.26	1.308	1.269	0.776	0.759	0.773	0.843	0.803	0.853	0.688	7.6348e-7	1.144	0.00042161	0.651	3.9487e-05	1.083	0.0158644	chloroplast	GO:0000413 protein peptidyl-prolyl isomerization; GO:0006464 cellular protein modification process; GO:0006807 nitrogen compound metabolic process; GO:0008152 metabolic process; GO:0009987 cellular process; GO:0018193 peptidyl-amino acid modification; GO:0018208 peptidyl-proline modification; GO:0019538 protein metabolic process; GO:0036211 protein modification process; GO:0043170 macromolecule m…	GO:0005622 intracellular; GO:0005623 cell; GO:0005737 cytoplasm; GO:0009507 chloroplast; GO:0009534 chloroplast thylakoid; GO:0009535 chloroplast thylakoid membrane; GO:0009536 plastid; GO:0009579 thylakoid; GO:0016020 membrane; GO:0031976 plastid thylakoid; GO:0031977 thylakoid lumen; GO:0031984 organelle subcompartment; GO:0034357 photosynthetic membrane; GO:0042651 thylakoid membrane; GO:00432…	GO:0003755 peptidyl-prolyl cis-trans isomerase activity; GO:0003824 catalytic activity; GO:0016853 isomerase activity; GO:0016859 cis-trans isomerase activity;				PF00160	Cyclophilin type peptidyl-prolyl cis-trans isomerase/CLD				M0VY36	A0A287HS45	0.882573
Cluster5	A0A287HNS2	Putative mitochondrial saccharopine dehydrogenase-like oxidoreductase(predicted) OS=Hordeum vulgare subsp. vulgare OX=112509 PE=4 SV=1	---	1.002	1.189	1.121	1.378	1.084	1.323	0.474	1.033	0.986	0.738	0.709	0.965	0.753	0.25772	1.143	0.21834	0.637	0.020279	0.968	0.95854	plasma membrane		GO:0005622 intracellular; GO:0005623 cell; GO:0005737 cytoplasm; GO:0005739 mitochondrion; GO:0005773 vacuole; GO:0005774 vacuolar membrane; GO:0005886 plasma membrane; GO:0009507 chloroplast; GO:0009526 plastid envelope; GO:0009536 plastid; GO:0009941 chloroplast envelope; GO:0016020 membrane; GO:0031090 organelle membrane; GO:0031967 organelle envelope; GO:0031975 envelope; GO:0043226 organelle…							S	KOG2733	Uncharacterized membrane protein	A0A287EVI4	A0A287HNS2	0.288775
Cluster5	A0A287HLL3	Glyceraldehyde-3-phosphate dehydrogenase A(predicted) OS=Hordeum vulgare subsp. vulgare OX=112509 PE=4 SV=1	---	1.062	1.091	1.091	1.326	1.289	1.337	0.716	0.74	0.738	0.858	0.879	0.872	0.676	4.7028e-06	1.218	0.000158858	0.66	3.0064e-06	1.189	0.000164508	nucleus												M0YMJ0	A0A287HLL3	0.720113
Cluster5	A0A287HJK1	Cytochrome c oxidase subunit 6B(predicted) OS=Hordeum vulgare subsp. vulgare OX=112509 PE=4 SV=1	---	1.089	1.102	1.071	1.326	1.254	1.312	0.693	0.711	0.714	0.917	0.897	0.914	0.649	2.0738e-06	1.193	0.00075564	0.701	4.1445e-05	1.288	2.2981e-05	mitochondria				K02267	COX6B; cytochrome c oxidase subunit 6b	osa00190 Oxidative phosphorylation - Oryza sativa japonica (Japanese rice) (RefSeq); osa01100 Metabolic pathways - Oryza sativa japonica (Japanese rice) (RefSeq);			C	KOG3057	Cytochrome c oxidase, subunit VIb/COX12	A0A287XKD7	A0A287HJK1	0.608636
Cluster5	A0A287HIL4	Amino_oxidase domain-containing protein OS=Hordeum vulgare subsp. vulgare OX=112509 PE=4 SV=1	---	1.239	1.227	1.217	1.282	1.325	1.24	0.668	0.728	0.719	0.737	0.803	0.815	0.574	3.7324e-05	1.045	0.094736	0.612	0.000180329	1.113	0.060178	chloroplast							PF01593	Flavin containing amine oxidoreductase				F2D6Q1	A0A287HIL4	0.617969
Cluster5	A0A287HEY1	Abhydrolase_3 domain-containing protein OS=Hordeum vulgare subsp. vulgare OX=112509 PE=4 SV=1	---	1.193	1.442	1.188	1.392	1.321	1.402	0.636	0.76	0.687	0.678	0.519	0.782	0.545	0.00180002	1.076	0.30964	0.481	0.025575	0.95	0.65686	cytoplasm	GO:0000003 reproduction; GO:0000902 cell morphogenesis; GO:0000904 cell morphogenesis involved in differentiation; GO:0003006 developmental process involved in reproduction; GO:0008152 metabolic process; GO:0009056 catabolic process; GO:0009653 anatomical structure morphogenesis; GO:0009826 unidimensional cell growth; GO:0009856 pollination; GO:0009860 pollen tube growth; GO:0009932 cell tip grow…		GO:0003824 catalytic activity; GO:0016787 hydrolase activity; GO:0016788 hydrolase activity, acting on ester bonds; GO:0052689 carboxylic ester hydrolase activity;				PF07859	alpha/beta hydrolase fold	V	KOG1515	Arylacetamide deacetylase	A0A287V6Y4	A0A287HEY1	0.365515
Cluster5	A0A287H208	Ribulose bisphosphate carboxylase small chain OS=Hordeum vulgare subsp. vulgare OX=112509 PE=3 SV=1	---	1.123	1.132	1.085	1.232	1.277	1.255	0.814	0.826	0.813	0.812	0.819	0.812	0.734	2.2452e-05	1.127	0.00198116	0.649	1.1421e-06	0.996	0.52476	chloroplast		GO:0005622 intracellular; GO:0005623 cell; GO:0005737 cytoplasm; GO:0009507 chloroplast; GO:0009536 plastid; GO:0043226 organelle; GO:0043227 membrane-bounded organelle; GO:0043229 intracellular organelle; GO:0043231 intracellular membrane-bounded organelle; GO:0044424 intracellular part; GO:0044444 cytoplasmic part; GO:0044464 cell part;		K01602	rbcS; ribulose-bisphosphate carboxylase small chain [EC:4.1.1.39]	osa00630 Glyoxylate and dicarboxylate metabolism - Oryza sativa japonica (Japanese rice) (RefSeq); osa00710 Carbon fixation in photosynthetic organisms - Oryza sativa japonica (Japanese rice) (RefSeq); osa01100 Metabolic pathways - Oryza sativa japonica (Japanese rice) (RefSeq); osa01110 Biosynthesis of secondary metabolites - Oryza sativa japonica (Japanese rice) (RefSeq); osa01200 Carbon metabo…	PF00101	Ribulose bisphosphate carboxylase, small chain				A0A287N3Z1	A0A287H208	0.738628
Cluster5	A0A287GWE7	PEROXIDASE_4 domain-containing protein OS=Hordeum vulgare subsp. vulgare OX=112509 PE=3 SV=1	---	1.101	1.051	1.097	1.344	1.33	1.291	0.731	0.752	0.74	0.856	0.856	0.85	0.684	2.2019e-05	1.22	0.00048254	0.646	1.8662e-06	1.152	7.8146e-05	cytoplasm	GO:0000302 response to reactive oxygen species; GO:0006950 response to stress; GO:0006979 response to oxidative stress; GO:0007154 cell communication; GO:0007165 signal transduction; GO:0008152 metabolic process; GO:0009056 catabolic process; GO:0009266 response to temperature stimulus; GO:0009409 response to cold; GO:0009628 response to abiotic stimulus; GO:0009631 cold acclimation; GO:0009636 r…	GO:0005622 intracellular; GO:0005623 cell; GO:0005737 cytoplasm; GO:0005739 mitochondrion; GO:0009507 chloroplast; GO:0009532 plastid stroma; GO:0009534 chloroplast thylakoid; GO:0009535 chloroplast thylakoid membrane; GO:0009536 plastid; GO:0009570 chloroplast stroma; GO:0009579 thylakoid; GO:0016020 membrane; GO:0031976 plastid thylakoid; GO:0031984 organelle subcompartment; GO:0034357 photosyn…	GO:0003824 catalytic activity; GO:0004130 cytochrome-c peroxidase activity; GO:0004601 peroxidase activity; GO:0016209 antioxidant activity; GO:0016491 oxidoreductase activity; GO:0016684 oxidoreductase activity, acting on peroxide as acceptor;	K00434	E1.11.1.11; L-ascorbate peroxidase [EC:1.11.1.11]	osa00053 Ascorbate and aldarate metabolism - Oryza sativa japonica (Japanese rice) (RefSeq); osa00480 Glutathione metabolism - Oryza sativa japonica (Japanese rice) (RefSeq); osa01100 Metabolic pathways - Oryza sativa japonica (Japanese rice) (RefSeq);	PF00141	Peroxidase				A0A287TDE6	A0A287GWE7	0.758842
Cluster5	A0A287G4N5	Cold-regulated protein(predicted) OS=Hordeum vulgare subsp. vulgare OX=112509 PE=4 SV=1	---	0.895	0.913	0.91	1.473	1.438	1.57	0.681	0.73	0.722	0.852	0.895	0.923	0.785	0.0004164	1.649	4.4857e-05	0.596	0.000121327	1.252	0.0021162	cytoplasm							PF01161	Phosphatidylethanolamine-binding protein				A0A287URU8	A0A287G4N5	0.445896
Cluster5	A0A287FW14	TPM_phosphatase domain-containing protein OS=Hordeum vulgare subsp. vulgare OX=112509 PE=4 SV=1	---	1.116	1.126	1.132	1.27	1.328	1.314	0.765	0.764	0.777	0.779	0.808	0.82	0.683	3.1004e-7	1.159	0.00046399	0.615	1.91284e-05	1.044	0.057781	chloroplast	GO:0006091 generation of precursor metabolites and energy; GO:0006793 phosphorus metabolic process; GO:0006796 phosphate-containing compound metabolic process; GO:0006807 nitrogen compound metabolic process; GO:0008152 metabolic process; GO:0009765 photosynthesis, light harvesting; GO:0009987 cellular process; GO:0010206 photosystem II repair; GO:0015979 photosynthesis; GO:0016311 dephosphorylati…	GO:0005622 intracellular; GO:0005623 cell; GO:0005737 cytoplasm; GO:0009507 chloroplast; GO:0009534 chloroplast thylakoid; GO:0009535 chloroplast thylakoid membrane; GO:0009536 plastid; GO:0009579 thylakoid; GO:0016020 membrane; GO:0031976 plastid thylakoid; GO:0031977 thylakoid lumen; GO:0031984 organelle subcompartment; GO:0034357 photosynthetic membrane; GO:0042651 thylakoid membrane; GO:00432…	GO:0003824 catalytic activity; GO:0003993 acid phosphatase activity; GO:0016787 hydrolase activity; GO:0016788 hydrolase activity, acting on ester bonds; GO:0016791 phosphatase activity; GO:0042578 phosphoric ester hydrolase activity;				PF04536	Repair protein				A0A287T052	A0A287FW14	0.874776
Cluster5	A0A287FIJ0	PAP_fibrillin domain-containing protein OS=Hordeum vulgare subsp. vulgare OX=112509 PE=4 SV=1	---	1.094	1.058	1.066	1.273	1.312	1.254	0.846	0.806	0.811	0.795	0.848	0.837	0.765	0.000123491	1.193	0.0004582	0.646	5.5698e-05	1.007	0.80042	nucleus												A0A287H4P7	A0A287FIJ0	0.681436
Cluster5	A0A287FDI6	BnaA10g06770D protein(predicted) OS=Hordeum vulgare subsp. vulgare OX=112509 PE=4 SV=1	---	1.041	1.035	1.051	1.356	1.412	1.391	0.727	0.723	0.742	0.813	0.853	0.856	0.701	1.2681e-06	1.33	2.1411e-05	0.606	1.81897e-05	1.151	0.00160054	chloroplast												A0A287PVH4	A0A287FDI6	0.679164
Cluster5	A0A287EUD7	Fe2OG dioxygenase domain-containing protein OS=Hordeum vulgare subsp. vulgare OX=112509 PE=3 SV=1	---	0.757	0.665	0.689	1.275	1.442	1.279	0.606	0.674	1.143	1.012	1.406	1.054	1.148	0.64638	1.893	0.00033934	0.869	0.24866	1.433	0.154359	cytoplasm				K05933	E1.14.17.4; aminocyclopropanecarboxylate oxidase [EC:1.14.17.4]	osa00270 Cysteine and methionine metabolism - Oryza sativa japonica (Japanese rice) (RefSeq); osa01100 Metabolic pathways - Oryza sativa japonica (Japanese rice) (RefSeq); osa01110 Biosynthesis of secondary metabolites - Oryza sativa japonica (Japanese rice) (RefSeq);	PF03171	2OG-Fe(II) oxygenase superfamily	Q	KOG0143	Iron/ascorbate family oxidoreductases		A0A287EUD7	0.208619
Cluster5	A0A287ERJ8	Germin-like protein OS=Hordeum vulgare subsp. vulgare OX=112509 PE=3 SV=1	---	1.116	1.203	1.157	1.108	1.302	1.388	0.737	0.761	0.921	0.777	0.857	0.672	0.696	0.0072999	1.093	0.29586	0.607	0.0068416	0.953	0.6546	chloroplast	GO:0006810 transport; GO:0009987 cellular process; GO:0010496 intercellular transport; GO:0010497 plasmodesmata-mediated intercellular transport; GO:0050789 regulation of biological process; GO:0050793 regulation of developmental process; GO:0051179 localization; GO:0051234 establishment of localization; GO:0051239 regulation of multicellular organismal process; GO:0065007 biological regulation; …	GO:0005618 cell wall; GO:0005623 cell; GO:0005911 cell-cell junction; GO:0009505 plant-type cell wall; GO:0009506 plasmodesma; GO:0030054 cell junction; GO:0030312 external encapsulating structure; GO:0044464 cell part; GO:0055044 symplast; GO:0071944 cell periphery;					PF00190	Cupin				A0A287THW9	A0A287ERJ8	0.374877
Cluster5	A0A287EDY9	Putative 20S proteasome subunit beta-4(predicted) OS=Hordeum vulgare subsp. vulgare OX=112509 PE=4 SV=1	---	1.021	1.212	1.079	1.246	1.569	1.242	0.757	0.664	0.629	0.97	0.843	0.767	0.619	0.0030045	1.225	0.097221	0.636	0.0119241	1.259	0.059677	chloroplast												A0A287E549	A0A287EDY9	0.522555
Cluster5	A0A287E155	FMN_dh domain-containing protein OS=Hordeum vulgare subsp. vulgare OX=112509 PE=4 SV=1	---	1.169	1.15	1.149	1.229	1.25	1.19	0.732	0.691	0.716	0.892	0.948	0.883	0.617	1.53442e-05	1.058	0.022199	0.742	0.00035596	1.273	0.00097696	mitochondria	GO:0008152 metabolic process; GO:0009853 photorespiration; GO:0009987 cellular process; GO:0010109 regulation of photosynthesis; GO:0016032 viral process; GO:0019048 modulation by virus of host morphology or physiology; GO:0019222 regulation of metabolic process; GO:0031323 regulation of cellular metabolic process; GO:0035821 modification of morphology or physiology of other organism; GO:0043094 …	GO:0005622 intracellular; GO:0005623 cell; GO:0005737 cytoplasm; GO:0005777 peroxisome; GO:0042579 microbody; GO:0043226 organelle; GO:0043227 membrane-bounded organelle; GO:0043229 intracellular organelle; GO:0043231 intracellular membrane-bounded organelle; GO:0044424 intracellular part; GO:0044444 cytoplasmic part; GO:0044464 cell part;	GO:0003824 catalytic activity; GO:0003973 (S)-2-hydroxy-acid oxidase activity; GO:0008891 glycolate oxidase activity; GO:0016491 oxidoreductase activity; GO:0016614 oxidoreductase activity, acting on CH-OH group of donors; GO:0016899 oxidoreductase activity, acting on the CH-OH group of donors, oxygen as acceptor;				PF01070	FMN-dependent dehydrogenase	C	KOG0538	Glycolate oxidase	A0A287HPR5	A0A287E155	0.553555
Cluster6	Q96565	3-aminomethylindole N-methyltransferase OS=Hordeum vulgare subsp. vulgare OX=112509 PE=1 SV=1	---	0.645	0.644	0.684	0.776	0.765	0.725	1.345	1.309	1.358	1.198	1.272	1.278	2.033	3.1026e-06	1.149	0.0084625	1.654	6.3934e-05	0.934	0.043899	chloroplast	GO:0006725 cellular aromatic compound metabolic process; GO:0008152 metabolic process; GO:0009058 biosynthetic process; GO:0009698 phenylpropanoid metabolic process; GO:0009699 phenylpropanoid biosynthetic process; GO:0009808 lignin metabolic process; GO:0009809 lignin biosynthetic process; GO:0009812 flavonoid metabolic process; GO:0009813 flavonoid biosynthetic process; GO:0009987 cellular proc…	GO:0005622 intracellular; GO:0005623 cell; GO:0005634 nucleus; GO:0005737 cytoplasm; GO:0005886 plasma membrane; GO:0005911 cell-cell junction; GO:0009506 plasmodesma; GO:0016020 membrane; GO:0030054 cell junction; GO:0043226 organelle; GO:0043227 membrane-bounded organelle; GO:0043229 intracellular organelle; GO:0043231 intracellular membrane-bounded organelle; GO:0044424 intracellular part; GO:…	GO:0003824 catalytic activity; GO:0008168 methyltransferase activity; GO:0008171 O-methyltransferase activity; GO:0008757 S-adenosylmethionine-dependent methyltransferase activity; GO:0016740 transferase activity; GO:0016741 transferase activity, transferring one-carbon groups; GO:0030744 luteolin O-methyltransferase activity; GO:0030755 quercetin 3-O-methyltransferase activity; GO:0033799 myrice…				PF08100; PF00891	Dimerisation domain; O-methyltransferase	S	KOG3178	Hydroxyindole-O-methyltransferase and related SAM-dependent methyltransferases	M0X4B4	Q96565	0.525603
Cluster6	Q70DK2	Blue copper binding protein OS=Hordeum vulgare subsp. vulgare OX=112509 GN=bcb PE=2 SV=1	bcb	0.66	0.62	0.616	1.058	1.163	1.126	1.142	1.137	1.09	1.108	1.088	1.192	1.777	2.3423e-05	1.765	8.4229e-05	1.012	0.77282	1.006	0.88058	vacuolar membrane							PF02298	Plastocyanin-like domain				A0A287Q7Z9	Q70DK2	0.348418
Cluster6	M0YNH1	PKS_ER domain-containing protein OS=Hordeum vulgare subsp. vulgare OX=112509 PE=3 SV=1	---	0.796	0.71	0.714	0.933	0.884	0.989	1.278	1.188	1.308	1.135	1.085	0.98	1.7	0.00035716	1.264	0.0089411	1.14	0.073583	0.848	0.033558	cytoplasm				K00083	E1.1.1.195; cinnamyl-alcohol dehydrogenase [EC:1.1.1.195]	osa00940 Phenylpropanoid biosynthesis - Oryza sativa japonica (Japanese rice) (RefSeq); osa01100 Metabolic pathways - Oryza sativa japonica (Japanese rice) (RefSeq); osa01110 Biosynthesis of secondary metabolites - Oryza sativa japonica (Japanese rice) (RefSeq);	PF08240	Alcohol dehydrogenase GroES-like domain	Q	KOG0023	Alcohol dehydrogenase, class V	A0A287KEC5	M0YNH1	0.511619
Cluster6	M0YIA7	Isocitrate dehydrogenase [NADP] OS=Hordeum vulgare subsp. vulgare OX=112509 PE=3 SV=1	---	0.642	0.635	0.648	0.746	0.779	0.783	1.281	1.264	1.288	1.304	1.313	1.318	1.991	5.7189e-8	1.199	0.00038202	1.705	2.2149e-06	1.027	0.0147826	chloroplast				K00031	IDH1, IDH2, icd; isocitrate dehydrogenase [EC:1.1.1.42]	osa00020 Citrate cycle (TCA cycle) - Oryza sativa japonica (Japanese rice) (RefSeq); osa00480 Glutathione metabolism - Oryza sativa japonica (Japanese rice) (RefSeq); osa01100 Metabolic pathways - Oryza sativa japonica (Japanese rice) (RefSeq); osa01110 Biosynthesis of secondary metabolites - Oryza sativa japonica (Japanese rice) (RefSeq); osa01200 Carbon metabolism - Oryza sativa japonica (Japan…	PF00180	Isocitrate/isopropylmalate dehydrogenase	C	KOG1526	NADP-dependent isocitrate dehydrogenase	A0A287GGJ8	M0YIA7	0.452925
Cluster6	M0YGY9	Cysteine synthase OS=Hordeum vulgare subsp. vulgare OX=112509 PE=3 SV=1	---	0.767	0.8	0.806	0.933	0.907	0.906	1.178	1.197	1.199	1.122	1.098	1.086	1.506	1.76808e-05	1.157	0.00130075	1.204	0.000162746	0.925	0.0021646	mitochondria	GO:0000096 sulfur amino acid metabolic process; GO:0000097 sulfur amino acid biosynthetic process; GO:0002376 immune system process; GO:0006082 organic acid metabolic process; GO:0006520 cellular amino acid metabolic process; GO:0006534 cysteine metabolic process; GO:0006535 cysteine biosynthetic process from serine; GO:0006563 L-serine metabolic process; GO:0006790 sulfur compound metabolic proc…	GO:0005622 intracellular; GO:0005623 cell; GO:0005737 cytoplasm; GO:0005739 mitochondrion; GO:0009507 chloroplast; GO:0009509 chromoplast; GO:0009532 plastid stroma; GO:0009536 plastid; GO:0009570 chloroplast stroma; GO:0043226 organelle; GO:0043227 membrane-bounded organelle; GO:0043229 intracellular organelle; GO:0043231 intracellular membrane-bounded organelle; GO:0044422 organelle part; GO:00…	GO:0003824 catalytic activity; GO:0004124 cysteine synthase activity; GO:0005488 binding; GO:0005507 copper ion binding; GO:0008144 drug binding; GO:0016740 transferase activity; GO:0016765 transferase activity, transferring alkyl or aryl (other than methyl) groups; GO:0016829 lyase activity; GO:0016846 carbon-sulfur lyase activity; GO:0019842 vitamin binding; GO:0030170 pyridoxal phosphate bindi…	K13034	ATCYSC1; L-3-cyanoalanine synthase/ cysteine synthase [EC:2.5.1.47 4.4.1.9]	osa00270 Cysteine and methionine metabolism - Oryza sativa japonica (Japanese rice) (RefSeq); osa00460 Cyanoamino acid metabolism - Oryza sativa japonica (Japanese rice) (RefSeq); osa00920 Sulfur metabolism - Oryza sativa japonica (Japanese rice) (RefSeq); osa01100 Metabolic pathways - Oryza sativa japonica (Japanese rice) (RefSeq); osa01110 Biosynthesis of secondary metabolites - Oryza sativa ja…			E	KOG1252	Cystathionine beta-synthase and related enzymes	A0A287LTT9	M0YGY9	0.600359
Cluster6	M0YB36	MAR-binding filament-like protein 1(predicted) OS=Hordeum vulgare subsp. vulgare OX=112509 PE=4 SV=1	---	0.597	0.673	0.699	1.164	1.074	1.148	1.121	1.083	1.114	1.076	1.161	1.088	1.685	0.00042167	1.72	0.00053651	0.982	0.62542	1.002	0.9523	nucleus		GO:0005622 intracellular; GO:0005623 cell; GO:0005634 nucleus; GO:0005737 cytoplasm; GO:0009295 nucleoid; GO:0009507 chloroplast; GO:0009532 plastid stroma; GO:0009534 chloroplast thylakoid; GO:0009535 chloroplast thylakoid membrane; GO:0009536 plastid; GO:0009579 thylakoid; GO:0016020 membrane; GO:0016363 nuclear matrix; GO:0031974 membrane-enclosed lumen; GO:0031976 plastid thylakoid; GO:003198…	GO:0003676 nucleic acid binding; GO:0003677 DNA binding; GO:0005488 binding; GO:0097159 organic cyclic compound binding; GO:1901363 heterocyclic compound binding;									A0A287F382	M0YB36	0.335319
Cluster6	M0Y3W8	Peroxidase OS=Hordeum vulgare subsp. vulgare OX=112509 PE=3 SV=1	---	0.747	0.924	0.812	1.051	1.017	1.117	1.293	1.204	1.419	1.088	0.611	0.717	1.577	0.0042378	1.283	0.020399	0.759	0.22092	0.617	0.045716	extracellular				K00430	E1.11.1.7; peroxidase [EC:1.11.1.7]	osa00940 Phenylpropanoid biosynthesis - Oryza sativa japonica (Japanese rice) (RefSeq); osa01100 Metabolic pathways - Oryza sativa japonica (Japanese rice) (RefSeq); osa01110 Biosynthesis of secondary metabolites - Oryza sativa japonica (Japanese rice) (RefSeq);	PF00141	Peroxidase				M0USB1	M0Y3W8	0.228341
Cluster6	M0Y075	Bowman-Birk type trypsin inhibitor OS=Hordeum vulgare subsp. vulgare OX=112509 PE=3 SV=1	---	0.772	0.831	0.804	0.831	0.843	0.818	1.337	1.13	1.206	1.111	1.179	1.137	1.526	0.0014019	1.035	0.20192	1.375	7.9955e-05	0.933	0.26526	extracellular							PF00228	Bowman-Birk serine protease inhibitor family				A0A287SIW8	M0Y075	0.461299
Cluster6	M0XYS7	Putative acyl transferase 4(predicted) OS=Hordeum vulgare subsp. vulgare OX=112509 PE=4 SV=1	---	0.824	0.828	0.813	0.807	0.814	0.873	1.261	1.251	1.244	1.077	1.107	1.101	1.524	1.9627e-7	1.012	0.68558	1.317	0.00046189	0.875	0.000136693	cytoplasm			GO:0003824 catalytic activity; GO:0016410 N-acyltransferase activity; GO:0016740 transferase activity; GO:0016746 transferase activity, transferring acyl groups; GO:0016747 transferase activity, transferring acyl groups other than amino-acyl groups;									A0A287EG36	M0XYS7	0.55298
Cluster6	M0X6H9	Probable monogalactosyldiacylglycerol synthase 1, chloroplastic(predicted) OS=Hordeum vulgare subsp. vulgare OX=112509 PE=4 SV=1	---	0.727	0.55	0.822	1.133	1.034	0.939	1.102	1.163	1.206	1.014	1.071	1.24	1.654	0.0132766	1.48	0.036863	1.071	0.45164	0.958	0.52188	cytoplasm	GO:0000003 reproduction; GO:0003006 developmental process involved in reproduction; GO:0006629 lipid metabolic process; GO:0006643 membrane lipid metabolic process; GO:0006664 glycolipid metabolic process; GO:0006996 organelle organization; GO:0007275 multicellular organism development; GO:0008152 metabolic process; GO:0008610 lipid biosynthetic process; GO:0009058 biosynthetic process; GO:000924…	GO:0005622 intracellular; GO:0005623 cell; GO:0005737 cytoplasm; GO:0009507 chloroplast; GO:0009526 plastid envelope; GO:0009528 plastid inner membrane; GO:0009536 plastid; GO:0009706 chloroplast inner membrane; GO:0009941 chloroplast envelope; GO:0016020 membrane; GO:0019866 organelle inner membrane; GO:0031090 organelle membrane; GO:0031967 organelle envelope; GO:0031969 chloroplast membrane; G…	GO:0003824 catalytic activity; GO:0008194 UDP-glycosyltransferase activity; GO:0008378 galactosyltransferase activity; GO:0016740 transferase activity; GO:0016757 transferase activity, transferring glycosyl groups; GO:0016758 transferase activity, transferring hexosyl groups; GO:0035250 UDP-galactosyltransferase activity; GO:0046509 1,2-diacylglycerol 3-beta-galactosyltransferase activity;	K03715	MGD; 1,2-diacylglycerol 3-beta-galactosyltransferase [EC:2.4.1.46]	osa00561 Glycerolipid metabolism - Oryza sativa japonica (Japanese rice) (RefSeq); osa01100 Metabolic pathways - Oryza sativa japonica (Japanese rice) (RefSeq);	PF04101	Glycosyltransferase family 28 C-terminal domain				A0A287RL62	M0X6H9	0.36109
Cluster6	M0X4P9	5-oxoprolinase(predicted) OS=Hordeum vulgare subsp. vulgare OX=112509 PE=4 SV=1	---	0.821	1	0.853	0.907	0.969	0.838	1.352	1.351	1.318	1	0.9	0.691	1.504	0.021242	1.015	0.83056	0.955	0.6569	0.644	0.054855	cytoplasm	GO:0006518 peptide metabolic process; GO:0006575 cellular modified amino acid metabolic process; GO:0006749 glutathione metabolic process; GO:0006751 glutathione catabolic process; GO:0006790 sulfur compound metabolic process; GO:0006807 nitrogen compound metabolic process; GO:0008152 metabolic process; GO:0009056 catabolic process; GO:0009987 cellular process; GO:0034641 cellular nitrogen compou…	GO:0005622 intracellular; GO:0005623 cell; GO:0005737 cytoplasm; GO:0005829 cytosol; GO:0005911 cell-cell junction; GO:0009506 plasmodesma; GO:0030054 cell junction; GO:0044424 intracellular part; GO:0044444 cytoplasmic part; GO:0044464 cell part; GO:0055044 symplast;	GO:0003824 catalytic activity; GO:0016787 hydrolase activity; GO:0016810 hydrolase activity, acting on carbon-nitrogen (but not peptide) bonds; GO:0016812 hydrolase activity, acting on carbon-nitrogen (but not peptide) bonds, in cyclic amides; GO:0017168 5-oxoprolinase (ATP-hydrolyzing) activity;	K01469	OPLAH, OXP1, oplAH; 5-oxoprolinase (ATP-hydrolysing) [EC:3.5.2.9]	osa00480 Glutathione metabolism - Oryza sativa japonica (Japanese rice) (RefSeq); osa01100 Metabolic pathways - Oryza sativa japonica (Japanese rice) (RefSeq);			E	KOG1939	Oxoprolinase	S4Z187	M0X4P9	0.29792
Cluster6	M0WVM3	Lipoxygenase OS=Hordeum vulgare subsp. vulgare OX=112509 PE=3 SV=1	---	0.674	0.719	0.688	0.613	0.593	0.703	1.642	1.418	1.631	1.062	1.156	1.102	2.254	9.7407e-05	0.917	0.185164	1.739	0.00064269	0.708	0.0030592	cytoplasm				K15718	LOX1_5; linoleate 9S-lipoxygenase [EC:1.13.11.58]	osa00591 Linoleic acid metabolism - Oryza sativa japonica (Japanese rice) (RefSeq);	PF01477; PF00305	PLAT/LH2 domain; Lipoxygenase				A0A287X1U8	M0WVM3	0.464674
Cluster6	M0WV56	Annexin OS=Hordeum vulgare subsp. vulgare OX=112509 PE=3 SV=1	---	0.673	0.952	0.828	0.9	0.793	0.973	1.22	1.193	1.268	0.998	1.08	1.12	1.501	0.0153236	1.087	0.48598	1.2	0.054924	0.869	0.021144	cytoplasm	GO:0001101 response to acid chemical; GO:0006950 response to stress; GO:0006970 response to osmotic stress; GO:0009266 response to temperature stimulus; GO:0009408 response to heat; GO:0009409 response to cold; GO:0009414 response to water deprivation; GO:0009415 response to water; GO:0009628 response to abiotic stimulus; GO:0009651 response to salt stress; GO:0010035 response to inorganic substa…	GO:0005622 intracellular; GO:0005623 cell; GO:0005737 cytoplasm; GO:0005773 vacuole; GO:0043226 organelle; GO:0043227 membrane-bounded organelle; GO:0043229 intracellular organelle; GO:0043231 intracellular membrane-bounded organelle; GO:0044424 intracellular part; GO:0044444 cytoplasmic part; GO:0044464 cell part;		K17098	ANNAT; annexin D				U	KOG0819	Annexin	A0A287HKK2	M0WV56	0.437324
Cluster6	M0WV50	Annexin D4(predicted) OS=Hordeum vulgare subsp. vulgare OX=112509 PE=4 SV=1	---	0.672	0.67	0.659	0.742	0.769	0.758	1.375	1.363	1.371	1.205	1.213	1.204	2.053	2.1223e-8	1.134	0.00047755	1.596	8.0204e-7	0.881	1.7526e-06	cytoplasm	GO:0001101 response to acid chemical; GO:0006950 response to stress; GO:0006970 response to osmotic stress; GO:0009266 response to temperature stimulus; GO:0009408 response to heat; GO:0009409 response to cold; GO:0009414 response to water deprivation; GO:0009415 response to water; GO:0009628 response to abiotic stimulus; GO:0009651 response to salt stress; GO:0009719 response to endogenous stimu…	GO:0005911 cell-cell junction; GO:0009506 plasmodesma; GO:0030054 cell junction; GO:0055044 symplast;	GO:0003676 nucleic acid binding; GO:0003723 RNA binding; GO:0003729 mRNA binding; GO:0005488 binding; GO:0097159 organic cyclic compound binding; GO:1901363 heterocyclic compound binding;	K17098	ANNAT; annexin D				U	KOG0819	Annexin	A0A287SPP3	M0WV50	0.615625
Cluster6	M0WPG8	Putative MO25-like protein(predicted) OS=Hordeum vulgare subsp. vulgare OX=112509 PE=4 SV=1	---	0.706	0.895	0.82	0.782	1.14	0.815	1.377	1.116	1.688	0.894	0.851	0.916	1.727	0.0177176	1.131	0.45996	0.972	0.9143	0.636	0.022581	chloroplast		GO:0005623 cell; GO:0005886 plasma membrane; GO:0016020 membrane; GO:0044464 cell part; GO:0071944 cell periphery;		K08272	CAB39, MO25; calcium binding protein 39				S	KOG1566	Conserved protein Mo25	A0A287R987	M0WPG8	0.337589
Cluster6	M0VYV1	Amino_oxidase domain-containing protein OS=Hordeum vulgare subsp. vulgare OX=112509 PE=4 SV=1	---	0.8	0.808	0.806	0.807	0.849	0.81	1.429	1.426	1.454	0.912	0.939	0.961	1.785	5.8517e-8	1.022	0.2735	1.14	0.004137	0.653	1.63808e-05	chloroplast	GO:0006576 cellular biogenic amine metabolic process; GO:0006595 polyamine metabolic process; GO:0006598 polyamine catabolic process; GO:0006807 nitrogen compound metabolic process; GO:0008152 metabolic process; GO:0009056 catabolic process; GO:0009308 amine metabolic process; GO:0009310 amine catabolic process; GO:0009987 cellular process; GO:0034641 cellular nitrogen compound metabolic process;…		GO:0000166 nucleotide binding; GO:0003824 catalytic activity; GO:0005488 binding; GO:0016491 oxidoreductase activity; GO:0016645 oxidoreductase activity, acting on the CH-NH group of donors; GO:0016647 oxidoreductase activity, acting on the CH-NH group of donors, oxygen as acceptor; GO:0036094 small molecule binding; GO:0043167 ion binding; GO:0043168 anion binding; GO:0046592 polyamine oxidase a…	K13366	MPAO, PAO1; polyamine oxidase [EC:1.5.3.14 1.5.3.16 1.5.3.-]	osa00330 Arginine and proline metabolism - Oryza sativa japonica (Japanese rice) (RefSeq); osa00410 beta-Alanine metabolism - Oryza sativa japonica (Japanese rice) (RefSeq); osa01100 Metabolic pathways - Oryza sativa japonica (Japanese rice) (RefSeq);	PF01593	Flavin containing amine oxidoreductase	Q	KOG0029	Amine oxidase	A0A287XW61	M0VYV1	0.447781
Cluster6	M0UW32	Dehydrin 8(predicted) OS=Hordeum vulgare subsp. vulgare OX=112509 PE=3 SV=1	---	0.612	0.642	0.688	0.937	0.986	0.958	1.083	1.048	1.082	1.316	1.301	1.347	1.654	0.000142384	1.484	0.00043828	1.376	5.9374e-05	1.234	0.000142889	nucleus	GO:0001101 response to acid chemical; GO:0006950 response to stress; GO:0009266 response to temperature stimulus; GO:0009409 response to cold; GO:0009414 response to water deprivation; GO:0009415 response to water; GO:0009628 response to abiotic stimulus; GO:0009631 cold acclimation; GO:0009719 response to endogenous stimulus; GO:0009725 response to hormone; GO:0009737 response to abscisic acid; …	GO:0005622 intracellular; GO:0005623 cell; GO:0005737 cytoplasm; GO:0005829 cytosol; GO:0016020 membrane; GO:0044424 intracellular part; GO:0044444 cytoplasmic part; GO:0044464 cell part;										A0A287X237	M0UW32	0.36781
Cluster6	F2EHA8	Predicted protein OS=Hordeum vulgare subsp. vulgare OX=112509 PE=2 SV=1	---	0.82	0.715	0.66	1.043	1.092	0.755	1.268	1.222	1.248	1.058	0.986	1.134	1.703	0.00112381	1.317	0.114539	1.1	0.43592	0.85	0.0172181	extracellular												M0YUD2	F2EHA8	0.416177
Cluster6	F2EAD0	Predicted protein OS=Hordeum vulgare subsp. vulgare OX=112509 PE=2 SV=1	---	0.693	0.727	0.692	0.817	0.873	0.95	1.107	1.28	1.249	1.19	1.273	1.149	1.722	0.00034185	1.25	0.008921	1.368	0.0040422	0.993	0.92318	cytoplasm							PF00168	C2 domain				A0A287L247	F2EAD0	0.486528
Cluster6	F2DP49	Predicted protein OS=Hordeum vulgare subsp. vulgare OX=112509 PE=2 SV=1	---	0.822	0.805	0.838	0.836	0.858	0.894	1.276	1.263	1.313	1.054	1.074	0.968	1.563	1.54397e-05	1.05	0.099878	1.196	0.008858	0.804	0.0029778	chloroplast	GO:0000003 reproduction; GO:0000302 response to reactive oxygen species; GO:0001101 response to acid chemical; GO:0002218 activation of innate immune response; GO:0002252 immune effector process; GO:0002253 activation of immune response; GO:0002376 immune system process; GO:0002682 regulation of immune system process; GO:0002684 positive regulation of immune system process; GO:0003006 development…	GO:0005622 intracellular; GO:0005623 cell; GO:0005737 cytoplasm; GO:0005886 plasma membrane; GO:0009507 chloroplast; GO:0009536 plastid; GO:0016020 membrane; GO:0043226 organelle; GO:0043227 membrane-bounded organelle; GO:0043229 intracellular organelle; GO:0043231 intracellular membrane-bounded organelle; GO:0044424 intracellular part; GO:0044444 cytoplasmic part; GO:0044464 cell part; GO:007194…	GO:0003824 catalytic activity; GO:0009975 cyclase activity; GO:0016853 isomerase activity; GO:0016860 intramolecular oxidoreductase activity; GO:0046423 allene-oxide cyclase activity;	K10525	AOC; allene oxide cyclase [EC:5.3.99.6]	osa00592 alpha-Linolenic acid metabolism - Oryza sativa japonica (Japanese rice) (RefSeq); osa01100 Metabolic pathways - Oryza sativa japonica (Japanese rice) (RefSeq); osa01110 Biosynthesis of secondary metabolites - Oryza sativa japonica (Japanese rice) (RefSeq);						A0A287VPE5	F2DP49	0.553995
Cluster6	F2DHN0	Predicted protein OS=Hordeum vulgare subsp. vulgare OX=112509 PE=2 SV=1	---	0.742	1.05	0.945	0.894	1.013	0.692	1.414	1.282	1.41	0.688	0.702	1.168	1.5	0.0182757	0.95	0.74188	0.984	0.8733	0.623	0.045956	cytoplasm	GO:0006518 peptide metabolic process; GO:0006807 nitrogen compound metabolic process; GO:0006950 response to stress; GO:0007154 cell communication; GO:0008152 metabolic process; GO:0009058 biosynthetic process; GO:0009237 siderophore metabolic process; GO:0009267 cellular response to starvation; GO:0009605 response to external stimulus; GO:0009987 cellular process; GO:0009991 response to extracel…		GO:0003824 catalytic activity; GO:0016491 oxidoreductase activity; GO:0016614 oxidoreductase activity, acting on CH-OH group of donors; GO:0016616 oxidoreductase activity, acting on the CH-OH group of donors, NAD or NADP as acceptor; GO:0033707 3''-deamino-3''-oxonicotianamine reductase activity;	K22374			PF00248	Aldo/keto reductase family	S	KOG1577	Aldo/keto reductase family proteins	A0A287JHB0	F2DHN0	0.261777
Cluster6	F2DF21	Predicted protein OS=Hordeum vulgare subsp. vulgare OX=112509 PE=2 SV=1	---	0.598	0.617	0.647	0.741	0.752	0.774	1.277	1.307	1.289	1.351	1.326	1.32	2.08	3.3512e-06	1.218	0.00167799	1.763	1.3239e-06	1.032	0.032383	chloroplast	GO:0006950 response to stress; GO:0009266 response to temperature stimulus; GO:0009409 response to cold; GO:0009628 response to abiotic stimulus; GO:0010035 response to inorganic substance; GO:0010038 response to metal ion; GO:0042221 response to chemical; GO:0046686 response to cadmium ion; GO:0050896 response to stimulus;	GO:0005622 intracellular; GO:0005623 cell; GO:0005737 cytoplasm; GO:0005739 mitochondrion; GO:0009507 chloroplast; GO:0009526 plastid envelope; GO:0009532 plastid stroma; GO:0009536 plastid; GO:0009570 chloroplast stroma; GO:0010319 stromule; GO:0031967 organelle envelope; GO:0031975 envelope; GO:0043226 organelle; GO:0043227 membrane-bounded organelle; GO:0043229 intracellular organelle; GO:0043…	GO:0000166 nucleotide binding; GO:0005488 binding; GO:0005524 ATP binding; GO:0008144 drug binding; GO:0017076 purine nucleotide binding; GO:0030554 adenyl nucleotide binding; GO:0032553 ribonucleotide binding; GO:0032555 purine ribonucleotide binding; GO:0032559 adenyl ribonucleotide binding; GO:0035639 purine ribonucleoside triphosphate binding; GO:0036094 small molecule binding; GO:0043167 ion…	K08232	E1.6.5.4; monodehydroascorbate reductase (NADH) [EC:1.6.5.4]	osa00053 Ascorbate and aldarate metabolism - Oryza sativa japonica (Japanese rice) (RefSeq); osa01100 Metabolic pathways - Oryza sativa japonica (Japanese rice) (RefSeq);	PF07992	Pyridine nucleotide-disulphide oxidoreductase	S	KOG1336	Monodehydroascorbate/ferredoxin reductase	A0A287PUV6	F2DF21	0.452623
[truncated: 64 more rows]
