# Supplementary material for: Abscisic Acid Regulates Carbohydrate Metabolism, Redox Homeostasis and Hormonal Regulation to Enhance Cold Tolerance in Spring Barley
Source: Int J Mol Sci. 2023 Jul 12;24(14):11348. doi: 10.3390/ijms241411348 (PMC10379442; doi:10.3390/ijms241411348)
Supplement: Supplementary file 1 [file ijms-24-11348-s001.zip › Table S4.xlsx]

## Sheet: sheet1
Table S4 List all of the expression differently abundant proteins in key metabolism pathway
metabolism pathway	Protein accession	Protein description	WT_OT_1	WT_OT_2	WT_OT_3	WT_LT_1	WT_LT_2	WT_LT_3	Az34_OT_1	Az34_OT_2	Az34_OT_3	Az34_LT_1	Az34_LT_2	Az34_LT_3
abscisic acid pathway	M0WV50	Annexin D4(predicted) OS=Hordeum vulgare subsp. vulgare OX=112509 PE=4 SV=1	0.672	0.67	0.659	0.742	0.769	0.758	1.375	1.363	1.371	1.205	1.213	1.204
	M0UZ78	20 kDa chaperonin, chloroplastic(predicted) OS=Hordeum vulgare subsp. vulgare OX=112509 PE=3 SV=1	0.87	0.878	0.903	0.776	0.837	0.794	0.963	0.944	0.969	1.353	1.342	1.371
	M0UW32	Dehydrin 8(predicted) OS=Hordeum vulgare subsp. vulgare OX=112509 PE=3 SV=1	0.612	0.642	0.688	0.937	0.986	0.958	1.083	1.048	1.082	1.316	1.301	1.347
	F2DP49	Predicted protein OS=Hordeum vulgare subsp. vulgare OX=112509 PE=2 SV=1	0.822	0.805	0.838	0.836	0.858	0.894	1.276	1.263	1.313	1.054	1.074	0.968
	F2DNM8	Predicted protein OS=Hordeum vulgare subsp. vulgare OX=112509 PE=2 SV=1	0.745	0.65	0.725	0.919	0.803	0.833	1.103	0.933	1.079	1.341	1.246	1.622
	A0A287T0X1	Arf-GAP domain-containing protein OS=Hordeum vulgare subsp. vulgare OX=112509 PE=4 SV=1	0.692	0.705	0.856	0.727	0.799	0.817	1.158	1.257	1.188	1.299	1.221	1.28
	A0A287SJY8	Putative aldehyde oxidase 3(predicted) OS=Hordeum vulgare subsp. vulgare OX=112509 PE=4 SV=1	1.495	1.329	1.543	1.437	1.318	1.376	0.888	0.784	0.837	0.261	0.43	0.302
	A0A287RYP0	C2 NT-type domain-containing protein OS=Hordeum vulgare subsp. vulgare OX=112509 PE=4 SV=1	1.039	1.077	1.064	1.322	1.382	1.31	0.88	0.841	0.867	0.715	0.771	0.729
	A0A287LHF7	HABP4_PAI-RBP1 domain-containing protein OS=Hordeum vulgare subsp. vulgare OX=112509 PE=4 SV=1	0.64	0.639	0.654	0.772	0.784	0.776	0.985	1.237	1.09	1.498	1.429	1.495
	A0A287K2I6	Non-specific lipid-transfer protein OS=Hordeum vulgare subsp. vulgare OX=112509 PE=3 SV=1	0.695	0.873	0.85	0.598	0.733	0.651	1.32	1.563	1.474	0.997	1.095	1.151
	A0A287H3Y7	Amine oxidase OS=Hordeum vulgare subsp. vulgare OX=112509 PE=3 SV=1	1.157	1.223	1.223	1.414	1.266	1.316	0.77	0.95	0.89	0.632	0.477	0.68
	A0A287GFX8	6-phosphogluconate dehydrogenase, decarboxylating OS=Hordeum vulgare subsp. vulgare OX=112509 PE=3 SV=1	0.516	0.513	0.47	0.547	0.578	0.558	1.493	1.462	1.526	1.43	1.468	1.438
	A0A287FYT4	Cold shock protein-1(predicted) OS=Hordeum vulgare subsp. vulgare OX=112509 PE=4 SV=1	0.654	0.626	0.621	0.694	0.672	0.671	1.392	1.356	1.322	1.299	1.323	1.371
	A0A287E0A9	PAP_fibrillin domain-containing protein OS=Hordeum vulgare subsp. vulgare OX=112509 PE=4 SV=1	1.354	1.365	1.296	1.149	1.134	1.071	0.793	0.808	0.768	0.727	0.754	0.781
starch and sucrose metabolism	M0YNW0	Alpha-1,4 glucan phosphorylase OS=Hordeum vulgare subsp. vulgare OX=112509 PE=3 SV=1	0.91	0.845	0.865	0.741	0.811	0.803	1.126	1.245	1.113	1.243	1.159	1.14
	A0A287Y0I9	Sucrose synthase OS=Hordeum vulgare subsp. vulgare OX=112509 PE=3 SV=1	1.294	1.609	1.552	1.428	1.106	1.473	0.505	0.646	0.559	0.522	0.734	0.573
	A0A287VYW6	Sucrose synthase OS=Hordeum vulgare subsp. vulgare OX=112509 PE=3 SV=1	0.663	0.645	0.667	0.719	0.713	0.729	1.419	1.406	1.436	1.19	1.19	1.224
	A0A287RWG3	Beta-glucosidase 31(predicted) OS=Hordeum vulgare subsp. vulgare OX=112509 PE=3 SV=1	1.476	1.258	1.234	1.227	0.957	1.021	1.013	1.133	0.902	0.637	0.608	0.533
	A0A287PZE8	Cell wall invertase(predicted) OS=Hordeum vulgare subsp. vulgare OX=112509 PE=3 SV=1	0.684	0.728	0.723	0.847	0.9	0.798	1.305	1.325	1.394	1.105	1.089	1.103
	A0A287M1N6	Alpha-1,4 glucan phosphorylase OS=Hordeum vulgare subsp. vulgare OX=112509 PE=3 SV=1	0.811	0.812	0.841	0.775	0.802	0.737	1.344	1.308	1.313	1.07	1.137	1.05
	A0A287LL26	Glyco_transf_20 domain-containing protein OS=Hordeum vulgare subsp. vulgare OX=112509 PE=4 SV=1	0.823	0.72	0.674	1.165	1.013	1.312	1.098	1.19	1.214	1.139	0.618	1.034
	A0A287HUJ6	Oxygen-evolving enhancer protein 3-1, chloroplastic(predicted) OS=Hordeum vulgare subsp. vulgare OX=112509 PE=4 SV=1	0.943	1.159	1.259	1.072	0.739	1.416	0.602	0.546	0.784	0.885	1.136	1.458
	A0A287GGJ8	Starch synthase, chloroplastic/amyloplastic OS=Hordeum vulgare subsp. vulgare OX=112509 PE=3 SV=1	0.652	0.511	0.51	0.375	0.513	0.559	1.718	1.692	1.815	1.192	1.305	1.158
carbon metabolism	Q7YMR6	Ribulose bisphosphate carboxylase large chain OS=Hordeum vulgare subsp. vulgare OX=112509 GN=rbcL PE=3 SV=1	1.061	1.084	1.093	1.227	1.297	1.248	0.824	0.815	0.84	0.831	0.827	0.854
	M0Z6C2	Malate dehydrogenase, chloroplastic(predicted) OS=Hordeum vulgare subsp. vulgare OX=112509 PE=3 SV=1	0.451	0.447	0.443	0.477	0.485	0.441	1.474	1.408	1.473	1.652	1.716	1.532
	M0YIA7	Isocitrate dehydrogenase [NADP] OS=Hordeum vulgare subsp. vulgare OX=112509 PE=3 SV=1	0.642	0.635	0.648	0.746	0.779	0.783	1.281	1.264	1.288	1.304	1.313	1.318
	M0YGY9	Cysteine synthase OS=Hordeum vulgare subsp. vulgare OX=112509 PE=3 SV=1	0.767	0.8	0.806	0.933	0.907	0.906	1.178	1.197	1.199	1.122	1.098	1.086
	F2DY57	Predicted protein OS=Hordeum vulgare subsp. vulgare OX=112509 PE=2 SV=1	0.742	0.871	0.832	0.589	0.446	0.602	1.027	1.306	1.17	1.454	1.501	1.461
	F2DDP7	Predicted protein OS=Hordeum vulgare subsp. vulgare OX=112509 PE=2 SV=1	0.675	0.71	0.729	0.762	0.763	0.757	1.306	1.316	1.323	1.229	1.204	1.225
	A0A287X237	Phosphoenolpyruvate carboxylase (Fragment)(predicted) OS=Hordeum vulgare subsp. vulgare OX=112509 PE=4 SV=1	0.664	0.675	0.669	0.644	0.656	0.618	1.405	1.413	1.423	1.294	1.244	1.295
	A0A287X1U8	Phosphoenolpyruvate carboxylase 1(predicted) OS=Hordeum vulgare subsp. vulgare OX=112509 PE=4 SV=1	0.611	0.644	0.63	0.584	0.542	0.53	1.527	1.482	1.433	1.393	1.338	1.286
	A0A287V7D1	Aconitate hydratase OS=Hordeum vulgare subsp. vulgare OX=112509 PE=3 SV=1	0.667	0.665	0.664	0.72	0.7	0.692	1.277	1.301	1.306	1.322	1.347	1.34
	A0A287V521	S-(hydroxymethyl)glutathione dehydrogenase(predicted) OS=Hordeum vulgare subsp. vulgare OX=112509 PE=4 SV=1	0.754	0.741	0.775	0.925	1.007	0.961	1.263	1.27	1.318	0.977	1.01	0.998
	A0A287U3X4	Phosphoenolpyruvate carboxylase(predicted) OS=Hordeum vulgare subsp. vulgare OX=112509 PE=3 SV=1	0.742	0.803	0.77	0.688	0.649	0.611	1.396	1.356	1.414	1.205	1.188	1.177
	A0A287TTF0	Glyceraldehyde-3-phosphate dehydrogenase OS=Hordeum vulgare subsp. vulgare OX=112509 PE=3 SV=1	0.836	0.773	0.858	0.671	0.692	0.567	1.114	1.112	1.103	1.562	1.557	1.154
	A0A287T8X2	Catalase OS=Hordeum vulgare subsp. vulgare OX=112509 PE=3 SV=1	0.994	0.937	1.002	1.295	1.328	1.373	1.182	1.088	1.101	0.578	0.565	0.555
	A0A287T458	2-Hacid_dh_C domain-containing protein OS=Hordeum vulgare subsp. vulgare OX=112509 PE=4 SV=1	1.137	1.136	1.17	1.258	1.236	1.27	0.768	0.786	0.793	0.837	0.803	0.807
	A0A287S9N1	Pyruvate dehydrogenase E1 component subunit beta OS=Hordeum vulgare subsp. vulgare OX=112509 PE=4 SV=1	0.9	1.017	0.856	0.493	0.318	0.588	0.572	1.031	1.238	1.679	1.61	1.699
	A0A287Q8X7	Cysteine synthase OS=Hordeum vulgare subsp. vulgare OX=112509 PE=3 SV=1	0.782	0.785	0.797	0.814	0.764	0.818	1.224	1.24	1.229	1.183	1.172	1.193
	A0A287LNW0	Pentatricopeptide (PPR) repeat protein-like(predicted) OS=Hordeum vulgare subsp. vulgare OX=112509 PE=4 SV=1	1.161	1.101	1.024	1.246	1.151	1.236	0.945	0.932	0.922	0.766	0.749	0.767
	A0A287LLI6	Number of grains 1(predicted) OS=Hordeum vulgare subsp. vulgare OX=112509 PE=3 SV=1	1.065	0.853	1.064	0.563	0.894	0.709	1.214	1.099	1.109	1.235	1.109	1.085
	A0A287H208	Ribulose bisphosphate carboxylase small chain OS=Hordeum vulgare subsp. vulgare OX=112509 PE=3 SV=1	1.123	1.132	1.085	1.232	1.277	1.255	0.814	0.826	0.813	0.812	0.819	0.812
	A0A287H1S6	Glucose-6-phosphate 1-dehydrogenase OS=Hordeum vulgare subsp. vulgare OX=112509 PE=3 SV=1	0.308	0.283	0.287	0.271	0.306	0.314	1.443	1.587	1.569	1.818	1.852	1.962
	A0A287GFX8	6-phosphogluconate dehydrogenase, decarboxylating OS=Hordeum vulgare subsp. vulgare OX=112509 PE=3 SV=1	0.516	0.513	0.47	0.547	0.578	0.558	1.493	1.462	1.526	1.43	1.468	1.438
	A0A287FVH3	Pyruvate, phosphate dikinase OS=Hordeum vulgare subsp. vulgare OX=112509 PE=4 SV=1	1.223	1.258	1.293	1.334	1.303	1.333	0.81	0.793	0.785	0.612	0.619	0.636
	A0A287FNB0	Pyruvate kinase OS=Hordeum vulgare subsp. vulgare OX=112509 PE=3 SV=1	1.083	0.864	0.798	0.776	0.827	0.661	1.111	1.125	1.104	1.192	1.176	1.284
	A0A287EXY1	Acyl-coenzyme A oxidase 4, peroxisomal(predicted) OS=Hordeum vulgare subsp. vulgare OX=112509 PE=3 SV=1	1.053	1.059	1.11	1.17	1.199	1.228	0.93	0.978	0.959	0.705	0.826	0.783
redox regulation	F2CPX2	Ferredoxin OS=Hordeum vulgare subsp. vulgare OX=112509 PE=2 SV=1	0.62	0.738	0.751	0.745	0.727	0.862	1.103	1.17	1.115	1.333	1.362	1.473
	A0A287WPW9	Glutaredoxin domain-containing protein OS=Hordeum vulgare subsp. vulgare OX=112509 PE=4 SV=1	0.574	0.58	0.606	1.275	1.068	2.54	0.983	0.877	1.056	0.771	0.99	0.682
	A0A287VDG0	Ferredoxin--NADP reductase, chloroplastic OS=Hordeum vulgare subsp. vulgare OX=112509 PE=4 SV=1	1.171	1.173	1.227	1.36	1.26	1.234	0.781	0.763	0.751	0.805	0.807	0.667
	A0A287UW51	Ferredoxin-nitrate reductase(predicted) OS=Hordeum vulgare subsp. vulgare OX=112509 PE=4 SV=1	0.642	0.646	0.629	0.717	0.69	0.696	1.283	1.27	1.292	1.358	1.375	1.403
	A0A287SIW8	Ferredoxin--NADP reductase, chloroplastic OS=Hordeum vulgare subsp. vulgare OX=112509 PE=3 SV=1	0.498	0.519	0.51	0.527	0.548	0.555	1.466	1.402	1.433	1.524	1.514	1.502
	A0A287P2H1	Thioredoxin domain-containing protein OS=Hordeum vulgare subsp. vulgare OX=112509 PE=4 SV=1	1.155	1.178	1.177	1.226	1.249	1.244	0.834	0.836	0.826	0.749	0.768	0.759
	A0A287MQ83	Thioredoxin OS=Hordeum vulgare subsp. vulgare OX=112509 PE=3 SV=1	1.135	1.115	1.165	1.201	1.166	1.258	0.735	0.747	0.782	0.889	0.905	0.901
	A0A287DVG9	Thioredoxin domain-containing protein OS=Hordeum vulgare subsp. vulgare OX=112509 PE=4 SV=1	0.784	0.779	0.761	0.606	0.562	0.539	1.204	1.267	1.207	1.404	1.42	1.467
glutathione metabolism	M0YIA7	Isocitrate dehydrogenase [NADP] OS=Hordeum vulgare subsp. vulgare OX=112509 PE=3 SV=1	0.642	0.635	0.648	0.746	0.779	0.783	1.281	1.264	1.288	1.304	1.313	1.318
	M0XXR9	Glutathione S-transferase(predicted) OS=Hordeum vulgare subsp. vulgare OX=112509 PE=3 SV=1	1.413	1.472	1.407	1.346	1.438	1.287	0.527	0.534	0.571	0.632	0.708	0.664
	M0X4P9	5-oxoprolinase(predicted) OS=Hordeum vulgare subsp. vulgare OX=112509 PE=4 SV=1	0.821	1	0.853	0.907	0.969	0.838	1.352	1.351	1.318	1	0.9	0.691
	F2D4L0	Predicted protein OS=Hordeum vulgare subsp. vulgare OX=112509 PE=2 SV=1	1.012	0.94	0.953	0.742	0.71	0.869	1.108	1.055	1.074	1.168	1.147	1.221
	A0A287WPW9	Glutaredoxin domain-containing protein OS=Hordeum vulgare subsp. vulgare OX=112509 PE=4 SV=1	0.574	0.58	0.606	1.275	1.068	2.54	0.983	0.877	1.056	0.771	0.99	0.682
	A0A287WHA8	PEROXIDASE_4 domain-containing protein OS=Hordeum vulgare subsp. vulgare OX=112509 PE=3 SV=1	1.128	1.069	1.076	1.402	1.307	1.186	0.786	0.804	0.736	0.803	0.858	0.845
	A0A287VXQ9	Glutathione peroxidase OS=Hordeum vulgare subsp. vulgare OX=112509 PE=3 SV=1	1.214	1.117	1.202	1.089	1.301	1.377	0.813	0.729	0.763	0.787	0.792	0.815
	A0A287V521	S-(hydroxymethyl)glutathione dehydrogenase(predicted) OS=Hordeum vulgare subsp. vulgare OX=112509 PE=4 SV=1	0.754	0.741	0.775	0.925	1.007	0.961	1.263	1.27	1.318	0.977	1.01	0.998
	A0A287SNY4	Putative glyoxalase I (Fragment)(predicted) OS=Hordeum vulgare subsp. vulgare OX=112509 PE=4 SV=1	1.023	1.191	1.188	1.228	1.374	1.224	0.717	0.737	0.807	0.782	0.85	0.878
	A0A287PV82	Glutathione S-transferase GSTF14 (Fragment)(predicted) OS=Hordeum vulgare subsp. vulgare OX=112509 PE=3 SV=1	1.499	1.422	1.491	1.382	1.321	1.415	0.533	0.526	0.534	0.629	0.593	0.656
	A0A287PUC3	Glutathione S-transferase 6, chloroplastic(predicted) OS=Hordeum vulgare subsp. vulgare OX=112509 PE=3 SV=1	1.444	1.515	1.499	1.212	1.244	1.236	0.655	0.588	0.597	0.647	0.675	0.689
	A0A287P6G9	PEROXIDASE_4 domain-containing protein OS=Hordeum vulgare subsp. vulgare OX=112509 PE=3 SV=1	1.087	1.093	1.041	1.236	1.281	1.251	0.856	0.823	0.859	0.839	0.832	0.802
	A0A287KTA5	Putative glutamyl-tRNA synthetase, cytoplasmic(predicted) OS=Hordeum vulgare subsp. vulgare OX=112509 PE=3 SV=1	0.826	0.76	0.532	0.964	0.735	0.802	1.523	1.569	1.589	0.96	0.849	0.892
	A0A287IHS1	PEROXIDASE_4 domain-containing protein OS=Hordeum vulgare subsp. vulgare OX=112509 PE=3 SV=1	0.532	0.519	0.541	0.652	0.658	0.669	1.378	1.362	1.438	1.48	1.308	1.463
	A0A287H1S6	Glucose-6-phosphate 1-dehydrogenase OS=Hordeum vulgare subsp. vulgare OX=112509 PE=3 SV=1	0.308	0.283	0.287	0.271	0.306	0.314	1.443	1.587	1.569	1.818	1.852	1.962
	A0A287H1C1	PEROXIDASE_4 domain-containing protein OS=Hordeum vulgare subsp. vulgare OX=112509 PE=3 SV=1	1.109	1.556	1.914	1.112	1.064	1.119	0.576	0.664	0.718	0.682	0.753	0.733
	A0A287GWE7	PEROXIDASE_4 domain-containing protein OS=Hordeum vulgare subsp. vulgare OX=112509 PE=3 SV=1	1.101	1.051	1.097	1.344	1.33	1.291	0.731	0.752	0.74	0.856	0.856	0.85
	A0A287GFX8	6-phosphogluconate dehydrogenase, decarboxylating OS=Hordeum vulgare subsp. vulgare OX=112509 PE=3 SV=1	0.516	0.513	0.47	0.547	0.578	0.558	1.493	1.462	1.526	1.43	1.468	1.438
	A0A287DVG9	Thioredoxin domain-containing protein OS=Hordeum vulgare subsp. vulgare OX=112509 PE=4 SV=1	0.784	0.779	0.761	0.606	0.562	0.539	1.204	1.267	1.207	1.404	1.42	1.467
photosynthesis	S4Z8A5	Photosystem II reaction center protein H OS=Hordeum vulgare subsp. vulgare OX=112509 GN=psbH PE=3 SV=1	1.257	1.198	1.239	1.292	1.299	1.233	0.691	0.706	0.7	0.756	0.755	0.874
	S4Z1Z4	Photosystem II CP47 reaction center protein OS=Hordeum vulgare subsp. vulgare OX=112509 GN=psbB PE=3 SV=1	1.163	1.129	1.151	1.276	1.295	1.234	0.785	0.76	0.782	0.804	0.799	0.822
	S4Z1V8	Photosystem II protein D1 OS=Hordeum vulgare subsp. vulgare OX=112509 GN=psbA PE=3 SV=1	1.182	1.174	1.207	1.169	1.232	1.156	0.859	0.858	0.872	0.737	0.757	0.796
	S4Z199	Cytochrome b559 subunit alpha OS=Hordeum vulgare subsp. vulgare OX=112509 GN=psbE PE=3 SV=1	1.2	1.2	1.187	1.288	1.279	1.289	0.705	0.707	0.737	0.802	0.803	0.804
	S4Z0F5	Cytochrome f OS=Hordeum vulgare subsp. vulgare OX=112509 GN=petA PE=3 SV=1	1.134	1.12	1.134	1.265	1.286	1.26	0.775	0.776	0.785	0.799	0.837	0.83
	F2EJP2	Predicted protein OS=Hordeum vulgare subsp. vulgare OX=112509 PE=2 SV=1	1.119	1.116	1.116	1.284	1.313	1.261	0.781	0.775	0.803	0.797	0.798	0.836
	F2DE22	Predicted protein OS=Hordeum vulgare subsp. vulgare OX=112509 PE=2 SV=1	1.247	1.272	1.232	1.395	1.551	1.518	0.599	0.539	0.548	0.661	0.693	0.743
	F2D6Q1	Chlorophyll a-b binding protein, chloroplastic OS=Hordeum vulgare subsp. vulgare OX=112509 PE=2 SV=1	1.148	1.188	1.172	0.636	0.696	0.653	1.083	1.072	1.09	1.098	1.113	1.051
	F2CRC1	Chlorophyll a-b binding protein, chloroplastic OS=Hordeum vulgare subsp. vulgare OX=112509 PE=2 SV=1	1.205	1.253	1.26	1.318	1.264	1.247	0.758	0.771	0.761	0.702	0.721	0.741
	F2CQR8	Chlorophyll a-b binding protein, chloroplastic OS=Hordeum vulgare subsp. vulgare OX=112509 PE=2 SV=1	1.159	1.231	1.148	1.255	1.276	1.292	0.802	0.766	0.778	0.761	0.781	0.753
	F2CQ53	Predicted protein OS=Hordeum vulgare subsp. vulgare OX=112509 PE=2 SV=1	0.818	0.824	0.816	0.666	0.621	0.612	1.11	1.105	1.188	1.416	1.432	1.393
	F2CPX2	Ferredoxin OS=Hordeum vulgare subsp. vulgare OX=112509 PE=2 SV=1	0.62	0.738	0.751	0.745	0.727	0.862	1.103	1.17	1.115	1.333	1.362	1.473
	A0A287XMI9	Carbonic anhydrase(predicted) OS=Hordeum vulgare subsp. vulgare OX=112509 PE=4 SV=1	0.452	0.425	0.376	0.349	0.383	0.424	1.669	1.573	1.472	1.572	1.485	1.821
	A0A287X6N5	Peptidylprolyl isomerase OS=Hordeum vulgare subsp. vulgare OX=112509 PE=4 SV=1	1.113	1.268	1.058	1.088	1.308	1.194	0.772	0.849	0.658	0.839	0.841	1.012
	A0A287WM51	Chlorophyll a-b binding protein, chloroplastic OS=Hordeum vulgare subsp. vulgare OX=112509 PE=3 SV=1	1.225	1.354	1.232	1.107	1.024	1.02	0.814	0.818	0.754	0.922	0.922	0.809
	A0A287WCF0	Chlorophyll a-b binding protein, chloroplastic OS=Hordeum vulgare subsp. vulgare OX=112509 PE=3 SV=1	1.182	1.207	1.189	1.245	1.302	1.331	0.709	0.719	0.77	0.765	0.825	0.757
	A0A287VDG0	Ferredoxin--NADP reductase, chloroplastic OS=Hordeum vulgare subsp. vulgare OX=112509 PE=4 SV=1	1.171	1.173	1.227	1.36	1.26	1.234	0.781	0.763	0.751	0.805	0.807	0.667
	A0A287UR13	Photosynthetic NDH subunit of subcomplex B 4 chloroplastic(predicted) OS=Hordeum vulgare subsp. vulgare OX=112509 PE=4 SV=1	1.358	1.265	1.176	1.147	1.185	1.136	0.616	0.757	0.902	0.785	0.916	0.758
	A0A287U537	ATP synthase subunit beta, chloroplastic OS=Hordeum vulgare subsp. vulgare OX=112509 GN=4525186 PE=3 SV=1	1.207	1.485	1.199	0.824	0.657	0.668	0.712	0.979	0.912	1.086	1.114	1.157
	A0A287TUT5	Chlorophyll a-b binding protein, chloroplastic OS=Hordeum vulgare subsp. vulgare OX=112509 PE=3 SV=1	1.172	1.149	1.179	1.289	1.282	1.319	0.757	0.756	0.773	0.772	0.774	0.777
	A0A287SSS3	Photosystem I reaction center subunit IV, chloroplastic(predicted) OS=Hordeum vulgare subsp. vulgare OX=112509 PE=4 SV=1	1.025	1.072	1.09	1.283	1.35	1.32	0.738	0.735	0.774	0.852	0.877	0.884
	A0A287SNX7	Chlorophyll a-b binding protein, chloroplastic OS=Hordeum vulgare subsp. vulgare OX=112509 PE=3 SV=1	0.184	1.314	1.055	1.143	1.51	1.452	0.748	0.94	0.946	0.804	0.96	0.944
	A0A287SIW8	Ferredoxin--NADP reductase, chloroplastic OS=Hordeum vulgare subsp. vulgare OX=112509 PE=3 SV=1	0.498	0.519	0.51	0.527	0.548	0.555	1.466	1.402	1.433	1.524	1.514	1.502
	A0A287SHI7	Photosystem I reaction center subunit III, chloroplastic(predicted) OS=Hordeum vulgare subsp. vulgare OX=112509 PE=4 SV=1	1.271	1.248	1.199	1.136	1.131	1.201	0.803	0.843	0.828	0.789	0.756	0.797
	A0A287RJL0	NAD(P)H-quinone oxidoreductase subunit 1, chloroplastic(predicted) OS=Hordeum vulgare subsp. vulgare OX=112509 PE=3 SV=1	1.229	1.31	1.373	1.188	1.113	1.213	0.674	0.996	0.685	0.735	0.703	0.783
	A0A287RGX3	Chlorophyll a-b binding protein, chloroplastic OS=Hordeum vulgare subsp. vulgare OX=112509 PE=3 SV=1	1.303	1.293	1.205	1.248	1.029	1.168	0.78	0.766	0.771	0.837	0.839	0.761
	A0A287QA48	Protease Do-like 5, chloroplastic(predicted) OS=Hordeum vulgare subsp. vulgare OX=112509 PE=4 SV=1	1.086	1.112	1.099	1.278	1.261	1.353	0.791	0.777	0.808	0.797	0.799	0.837
	A0A287PMF6	Expressed protein(predicted) OS=Hordeum vulgare subsp. vulgare OX=112509 PE=4 SV=1	1.131	1.17	1.171	1.261	1.327	1.273	0.734	0.758	0.766	0.789	0.797	0.823
	A0A287NAF4	Photosynthetic NDH subunit of subcomplex B 1, chloroplastic(predicted) OS=Hordeum vulgare subsp. vulgare OX=112509 PE=4 SV=1	1.158	1.188	1.194	1.218	1.245	1.217	0.795	0.77	0.785	0.795	0.802	0.833
	A0A287LT76	Protein CHLOROPLAST ENHANCING STRESS TOLERANCE, chloroplastic(predicted) OS=Hordeum vulgare subsp. vulgare OX=112509 PE=4 SV=1	0.937	1.235	1.54	1.947	1.027	1.51	0.41	0.745	0.344	0.983	0.83	0.492
	A0A287L5I7	Carbonic anhydrase OS=Hordeum vulgare subsp. vulgare OX=112509 PE=3 SV=1	0.96	1.048	1.055	1.458	1.353	1.484	0.659	0.692	0.639	0.926	0.852	0.874
	A0A287ILM1	Protease Do-like 8, chloroplastic(predicted) OS=Hordeum vulgare subsp. vulgare OX=112509 PE=4 SV=1	1.287	1.177	0.834	1.451	1.957	1.228	0.803	0.918	0.254	0.473	1.101	0.517
	A0A287I476	Tetratricopeptide repeat containing protein(predicted) OS=Hordeum vulgare subsp. vulgare OX=112509 PE=4 SV=1	1.072	1.098	1.071	1.273	1.327	1.277	0.78	0.748	0.808	0.848	0.834	0.864
	A0A287GNF7	PDZ domain-containing protein OS=Hordeum vulgare subsp. vulgare OX=112509 PE=4 SV=1	1.31	1.243	1.219	1.195	0.975	1.109	0.823	0.785	0.801	0.844	0.838	0.857
	A0A287GDG0	Protein kinase domain-containing protein OS=Hordeum vulgare subsp. vulgare OX=112509 PE=4 SV=1	1.214	1.2	1.062	1.194	1.193	1.244	0.868	0.892	0.863	0.759	0.753	0.758
	A0A287FW14	TPM_phosphatase domain-containing protein OS=Hordeum vulgare subsp. vulgare OX=112509 PE=4 SV=1	1.116	1.126	1.132	1.27	1.328	1.314	0.765	0.764	0.777	0.779	0.808	0.82
	A0A287E155	FMN_dh domain-containing protein OS=Hordeum vulgare subsp. vulgare OX=112509 PE=4 SV=1	1.169	1.15	1.149	1.229	1.25	1.19	0.732	0.691	0.716	0.892	0.948	0.883
	A0A287E0A9	PAP_fibrillin domain-containing protein OS=Hordeum vulgare subsp. vulgare OX=112509 PE=4 SV=1	1.354	1.365	1.296	1.149	1.134	1.071	0.793	0.808	0.768	0.727	0.754	0.781
